# Supplementary material for: Contribution à l'étude d'un problème de mortalité infantile au sein d'un groupe de babouins de Guinée (Papio papio) en captivité au Parc zoologique de Paris : analyse du contexte épidémiologique : étude du comportement alimentaire et du comportement maternel des femelles
Source: Royal Society of Chemistry journal article supplement (doi:10.1039/c6cc09925d), 2003-01-01
Supplement: c6cc09925d1.pdf [file c6cc09925d1.pdf]

# **An Enyne Cycloisomerization/[5+1] Reaction Sequence to Synthesize Tetrahydroisoquinolinones from Enyne-Enes and CO**

Zhe Zhuang, Chen-Long Li, Yu Xiang, Yu-Hao Wang, and Zhi-Xiang Yu\*

*Beijing National Laboratory of Molecular Sciences (BNLMS), Key Laboratory of Bioorganic Chemistry and Molecular Engineering, College of Chemistry, Peking University, Beijing, 100871, China*

*E-mail: yuzx@pku.edu.cn*

## **Contents**

|       |                                                                                     |          |
|-------|-------------------------------------------------------------------------------------|----------|
| I.    | General Information                                                                 | Page S2  |
| II.   | Preparation of Substrates                                                           | Page S4  |
| III.  | Reaction Condition Screening                                                        | Page S15 |
| IV.   | General Procedure and Experimental Details of Au(I)-Catalyzed Cycloisomerization    | Page S17 |
| V.    | General Procedure and Experimental Details of Rh(I)-Catalyzed [5+1] Cycloaddition   | Page S25 |
| VI.   | General Procedure and Experimental Details of Rh(I)-Catalyzed Rearrangement of VCPs | Page S32 |
| VII.  | General Procedure of One-pot Cycloisomerization/[5+1] Reaction Sequence             | Page S37 |
| VIII. | General Procedure of One-pot Cycloisomerization/Rearrangement Sequence              | Page S39 |
| IX.   | General Procedure of Pauson-Khand Cycloaddition                                     | Page S40 |
| X.    | General Procedure of Synthetic Transformation                                       | Page S41 |
| XI.   | References                                                                          | Page S44 |
| XII.  | NMR Spectra                                                                         | Page S45 |

## I. General Information

Air and moisture sensitive reactions were carried out in oven and flame-dried glassware sealed with rubber septa under a positive pressure of dry nitrogen or argon. Similarly, sensitive liquids and solutions were transferred via syringe. Reactions were stirred using Teflon-coated magnetic stir bars. Elevated temperatures were maintained using Thermostat-controlled silicone oil baths. Organic solutions were concentrated using a Büchi rotary evaporator with a desktop vacuum pump. DCE was superdry (water  $\leq$  30 ppm), which could be purchased from J&K. Synthetic reagents were purchased from J&K and Acros, and used without further purification, unless otherwise indicated. Analytical TLC was performed with 0.25 mm silica gel G plates with a 254 nm fluorescent indicator. The TLC plates were visualized by ultraviolet light and treatment with phosphomolybdic acid stain or  $\text{KMnO}_4$  stain followed by gentle heating. Purification of products was accomplished by flash chromatography on silica gel and the purified compounds show a single spot by analytical TLC.

NMR spectra were measured on Bruker ARX 400 ( $^1\text{H}$  at 400 MHz,  $^{13}\text{C}$  at 100 MHz) and Bruker AVANCE III ( $^1\text{H}$  at 500 MHz,  $^{13}\text{C}$  at 125 MHz) nuclear magnetic resonance spectrometers. Data for  $^1\text{H}$  NMR spectra are reported as follows: chemical shift (ppm, referenced to residual solvent peak ( $\text{CDCl}_3 = \delta$  7.26 ppm,  $\text{CD}_2\text{Cl}_2 = \delta$  5.32 ppm; s = singlet, d = doublet, t = triplet, q = quartet, dd = doublet of doublets, dt = doublet of triplets, ddd = doublet of doublet of doublets, ddt = doublet of doublet of triplets, dm = doublet of multiplet, m = multiplet), coupling constant (Hz), and integration. Data for  $^{13}\text{C}$  NMR are reported in terms of chemical shift (ppm) relative to residual solvent peak ( $\text{CDCl}_3 = \delta$  77.16 ppm,  $\text{CD}_2\text{Cl}_2 = \delta$  53.84 ppm). Infrared spectra were recorded on a Mettler-Toledo ReactIR iC10 system with a SiComp probe and are reported in wavenumbers ( $\text{cm}^{-1}$ ). High-resolution mass spectra (HRMS) were recorded on a Bruker Apex IV FTMS mass spectrometer (ESI or EI) with an FT-ICR analyzer.

### Abbreviations:

Ar = argon

Bn = benzyl

Boc = *t*-butoxycarbonyl

DCE = 1,2-dichloroethane

DCM = dichloromethane

DIAD = diisopropyl azodiformate

DIBAL-H = diisobutyl aluminium hydride

DIPA = diisopropylamine

DMF = *N,N*-dimethylformamide

dppp = 1,3-bis(diphenylphosphino) propane

EA = ethyl acetate

IPr = 1,3-bis(2,6-diisopropylphenyl) imidazole-2-ylidene

JohnPhos = 2-(di-*t*-butylphosphino)biphenyl

MS = molecular sieve

$\text{N}_2$  = nitrogen

*o*-Ns = *o*-nitrobenzenesulfonyl

PE = petroleum ether

rt = room temperature

TBS = *t*-butyldimethylsilyl

Tf = trifluoromethanesulfonyl

THF = tetrahydrofuran

TLC = thin layer chromatography

TMS = trimethylsilyl

Ts = *p*-toluenesulfonyl

## II. Preparation of Substrates

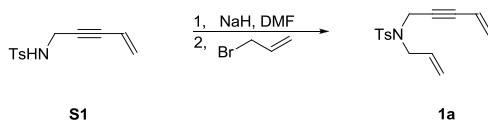

To a suspension of NaH (239.7 mg, 6.0 mmol, 60%) in DMF (20 mL) was added **S1**<sup>1</sup> (704.4 mg, 3.0 mmol) at 0 °C. After stirred for 15 min, a solution of allyl bromide (0.51 mL, 6.0 mmol) in DMF (10 mL) was added at 0 °C and the reaction mixture was stirred at the same temperature. The reaction was monitored by TLC and stirred for 1.5 h. Upon completion, saturated NH<sub>4</sub>Cl solution was added to quench the reaction. The resulting mixture was extracted with ether (3×150 mL), and the combined organic phase was washed with brine, then dried over Na<sub>2</sub>SO<sub>4</sub>, then filtered and concentrated. The crude product was purified by flash column chromatography on silica gel (eluted with PE/EA 50:1) to afford **1a** (804.7 mg, 98%).

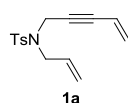

Colorless oil, TLC  $R_f$  = 0.54 (EA/PE = 1/5). <sup>1</sup>H NMR (400 MHz, CDCl<sub>3</sub>)  $\delta$  7.73 (d,  $J$  = 8.2 Hz, 2H), 7.28 (d,  $J$  = 8.2 Hz, 2H), 5.80 – 5.67 (m, 1H), 5.56 – 5.43 (m, 1H), 5.40 – 5.19 (m, 4H), 4.19 (d,  $J$  = 1.5 Hz, 2H), 3.80 (d,  $J$  = 6.4 Hz, 2H), 2.40 (s, 3H). <sup>13</sup>C NMR (100 MHz, CDCl<sub>3</sub>)  $\delta$  143.5, 136.1, 132.2, 129.6, 127.9, 127.4, 120.0, 116.4, 84.4, 82.6, 49.3, 36.7, 21.6. IR (neat): 2923, 1349, 1162, 1092 cm<sup>-1</sup>. HRMS (ESI): calcd. for C<sub>15</sub>H<sub>18</sub>NO<sub>2</sub>S ([M+H]<sup>+</sup>): 276.1053, found 276.1049.

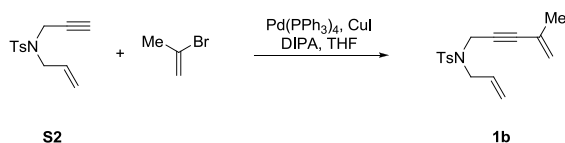

CuI (15.2 mg, 0.08 mmol) and Pd(PPh<sub>3</sub>)<sub>4</sub> (34.8 mg, 0.03 mmol) were dissolved in DIPA (1.6 mL). 2-bromoprop-1-ene (483.2 mg, 4.0 mmol) was added to the resulting solution at 0 °C. After stirred for 5 min, **S2**<sup>2</sup> (497.2 mg, 2.0 mmol) in DIPA (3.2 mL) and THF (2.0 mL) was added to the solution at 0 °C. The reaction was gradually allowed to warm to room temperature overnight. The reaction was monitored by TLC and stirred for 16 h. Upon completion, 2M HCl solution (15 mL) was added to quench the reaction. The resulting mixture was extracted with ether (3×20 mL), and the combined organic phase was washed with brine, then dried over Na<sub>2</sub>SO<sub>4</sub>, then filtered and concentrated. The crude product was purified by flash column chromatography on silica gel (eluted with PE/EA 50:1) to afford **1b** (183.6 mg, 32%).

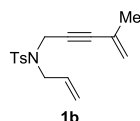

Yellow oil, TLC  $R_f$  = 0.50 (EA/PE = 1/5). <sup>1</sup>H NMR (500 MHz, CDCl<sub>3</sub>)  $\delta$  7.74 (d,  $J$  = 8.2 Hz, 2H), 7.28 (d,  $J$  = 8.2 Hz, 2H), 5.76 (ddt,  $J$  = 16.9, 10.1, 6.4 Hz, 1H), 5.29 (dd,  $J$  = 16.9, 1.3 Hz, 1H), 5.23 (dd,  $J$  = 10.1, 1.3 Hz, 1H), 5.12 – 5.08 (m, 1H), 4.97 (s, 1H), 4.20 (s, 2H), 3.81 (d,  $J$  = 6.4 Hz, 2H), 2.40 (s, 3H), 1.66 – 1.62 (m, 3H). <sup>13</sup>C NMR (125 MHz, CDCl<sub>3</sub>)  $\delta$  143.5, 136.2, 132.2, 129.6, 127.9, 126.1, 122.1, 119.9, 87.0, 80.9, 49.3, 36.7, 23.1, 21.6. IR (neat): 2955, 2922, 1351, 1163,

1093 cm<sup>-1</sup>. HRMS (ESI): calcd. for C<sub>16</sub>H<sub>19</sub>NaNO<sub>2</sub>S ([M+Na]<sup>+</sup>): 312.1029, found 312.1037.

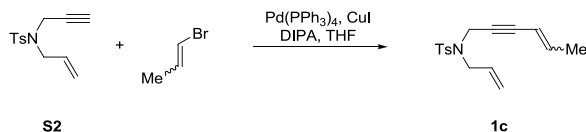

CuI (15.2 mg, 0.08 mmol) and Pd(PPh<sub>3</sub>)<sub>4</sub> (34.9 mg, 0.03 mmol) were dissolved in DIPA (1.6 mL). 1-bromoprop-1-ene (cis- and trans- mixture, 487.1 mg, 4.0 mmol) was added to the resulting solution at 0 °C. After stirred for 5 min, **S2**<sup>2</sup> (498.9 mg, 2.0 mmol) in DIPA (3.2 mL) and THF (2.0 mL) was added to the solution at 0 °C. The reaction was gradually allowed to warm to room temperature overnight. The reaction was monitored by TLC and stirred for 16 h. Upon completion, 2M HCl solution (15 ml) was added to quench the reaction. The resulting mixture was extracted with ether (3×20 mL), and the combined organic phase was washed with brine, then dried over Na<sub>2</sub>SO<sub>4</sub>, then filtered and concentrated. The crude product was purified by flash column chromatography on silica gel (eluted with PE/EA 50:1) to afford **1c** (203.3 mg, *Z/E* = 1/3.5, 35%).

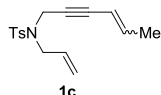

Light yellow oil, TLC *R*<sub>f</sub> = 0.53 (EA/PE = 1/5). (**Z**)-**1c**: <sup>1</sup>H NMR (400 MHz, CDCl<sub>3</sub>) δ 7.73 (d, *J* = 8.3 Hz, 2H), 7.29 (d, *J* = 8.3 Hz, 2H), 5.91 – 5.69 (m, 2H), 5.32 – 5.17 (m, 3H), 4.17 (d, *J* = 1.3 Hz, 2H), 3.80 (d, *J* = 6.5 Hz, 2H), 2.42 (s, 3H), 1.71 (dd, *J* = 6.8, 1.7 Hz, 3H). (**E**)-**1c**: <sup>1</sup>H NMR (400 MHz, CDCl<sub>3</sub>) δ 7.73 (d, *J* = 8.3 Hz, 2H × 3.5), 7.27 (d, *J* = 8.3 Hz, 2H × 3.5), 5.91 – 5.69 (m, 2H × 3.5), 5.32 – 5.17 (m, 3H × 3.5), 4.25 (d, *J* = 1.6 Hz, 2H × 3.5), 3.83 (d, *J* = 6.4 Hz, 2H × 3.5), 2.40 (s, 3H × 3.5), 1.62 (dd, *J* = 6.8, 1.6 Hz, 3H × 3.5). <sup>13</sup>C NMR (100 MHz, CDCl<sub>3</sub>) δ 143.5, 143.4, 140.3, 138.9, 136.2, 136.1, 132.2, 129.5, 127.94, 127.87, 119.91, 119.88, 109.9, 109.3, 86.4, 84.4, 82.4, 80.0, 49.20, 49.19, 36.9, 36.8, 21.6, 18.7, 15.9. IR (neat): 1440, 1348, 1161, 1119, 1092, 1056 cm<sup>-1</sup>. HRMS (ESI): calcd. for C<sub>16</sub>H<sub>19</sub>NaNO<sub>2</sub>S ([M+Na]<sup>+</sup>): 312.1029, found 312.1033.

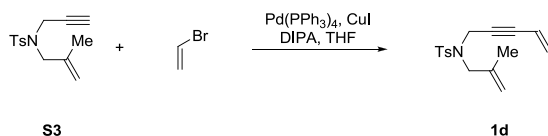

CuI (15.2 mg, 0.08 mmol) and Pd(PPh<sub>3</sub>)<sub>4</sub> (35.0 mg, 0.03 mmol) were dissolved in DIPA (2 mL). bromoethene (4.0 mL, 1.0 M in THF) was added to the resulting solution at 0 °C. After stirred for 5 min, **S3**<sup>3</sup> (524.6 mg, 2.0 mmol) in DIPA (8 mL) and THF (2 mL) was added to the solution at 0 °C. The reaction was gradually allowed to warm to room temperature overnight. The reaction was monitored by TLC and stirred for 12 h. Upon completion, 2M HCl solution (30 ml) was added to quench the reaction. The resulting mixture was extracted with ether (3×15 mL), and the combined organic phase was washed with brine, then dried over Na<sub>2</sub>SO<sub>4</sub>, then filtered and concentrated. The crude product was purified by flash column chromatography on silica gel (eluted with PE/EA 50:1) to afford **1d** (483.4 mg, 84%).

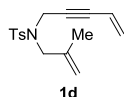

Light yellow oil, TLC  $R_f$  = 0.65 (EA/PE = 1/5).  $^1\text{H}$  NMR (500 MHz,  $\text{CDCl}_3$ )  $\delta$  7.74 (d,  $J$  = 8.2 Hz, 2H), 7.28 (d,  $J$  = 8.2 Hz, 2H), 5.47 (ddt,  $J$  = 17.3, 11.2, 1.7 Hz, 1H), 5.34 (dd,  $J$  = 11.2, 2.2 Hz, 1H), 5.28 (dd,  $J$  = 17.3, 2.2 Hz, 1H), 5.02 – 4.93 (m, 2H), 4.15 (d,  $J$  = 1.7 Hz, 2H), 3.71 (s, 2H), 2.41 (s, 3H), 1.77 (s, 3H).  $^{13}\text{C}$  NMR (125 MHz,  $\text{CDCl}_3$ )  $\delta$  143.5, 139.5, 136.2, 129.5, 128.0, 127.2, 116.4, 115.5, 84.1, 82.3, 52.8, 36.4, 21.6, 19.8. IR (neat): 2924, 1350, 1163, 1097  $\text{cm}^{-1}$ . HRMS (ESI): calcd. for  $\text{C}_{16}\text{H}_{20}\text{NO}_2\text{S}$  ( $[\text{M}+\text{H}]^+$ ): 290.1209, found 290.1214.

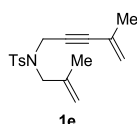

**1e**<sup>4</sup> is a known substrate.

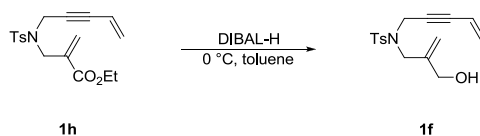

To a solution of **1h** (526.1 mg, 1.51 mmol) (for the synthesis of **1h**, see below) in toluene (15 mL) was added DIBAL-H (3.8 mL, 1.0 M in hexane, 3.8 mmol) under Ar at 0 °C. The reaction was gradually allowed to warm to room temperature, monitored by TLC, and stirred for 2 h. Upon completion, the reaction mixture was added saturated potassium sodium tartrate solution (30 mL) and stirred for further 30 min. The resulting mixture was extracted with ether (3×30 mL), and the combined organic phase was washed with brine, then dried over  $\text{Na}_2\text{SO}_4$ , then filtered and concentrated. The crude product was purified by flash column chromatography on silica gel (eluted with PE/EA 3:1) to afford **1f** (346.5 mg, 75%).

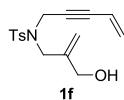

Colorless oil, TLC  $R_f$  = 0.49 (EA/PE = 1/2).  $^1\text{H}$  NMR (400 MHz,  $\text{CDCl}_3$ )  $\delta$  7.76 (d,  $J$  = 8.2 Hz, 2H), 7.29 (d,  $J$  = 8.2 Hz, 2H), 5.50 (ddt,  $J$  = 17.2, 11.2, 1.8 Hz, 1H), 5.37 (dd,  $J$  = 11.2, 2.4 Hz, 1H), 5.32 (dd,  $J$  = 17.2, 2.4 Hz, 1H), 5.23 (s, 1H), 5.10 (s, 1H), 4.18 (s, 4H), 3.83 (s, 2H), 2.41 (s, 3H), 2.30 – 2.11 (br. s, 1H).  $^{13}\text{C}$  NMR (100 MHz,  $\text{CDCl}_3$ )  $\delta$  143.8, 142.8, 135.7, 129.6, 128.0, 127.6, 116.3, 115.9, 84.6, 82.4, 63.5, 48.8, 36.7, 21.7. IR (neat): 2953, 2921, 1461, 1349, 1162, 1095  $\text{cm}^{-1}$ . HRMS (ESI): calcd. for  $\text{C}_{16}\text{H}_{20}\text{NO}_3\text{S}$  ( $[\text{M}+\text{H}]^+$ ): 306.1158, found 306.1161.

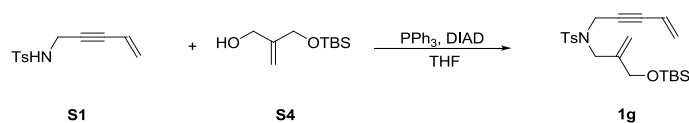

To a stirred solution of **S1**<sup>1</sup> (282.3 mg, 1.2 mmol) and  $\text{PPh}_3$  (475.2 mg, 1.8 mmol) in THF (11 mL) was added DIAD (365.6 mg, 1.8 mmol) at 0 °C. After stirring for 5 min, the solution was added **S4**<sup>5</sup>

(270.7 mg, 1.3 mmol) in THF (5 mL). The reaction was gradually allowed to warm to room temperature, monitored by TLC, and stirred for 3 h. Upon completion, the reaction mixture was concentrated and the crude product was purified by flash column chromatography on silica gel (eluted with PE/EA 50:1) to afford **1g** (466.2 mg, 93%).

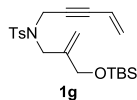

Colorless oil, TLC  $R_f$  = 0.70 (EA/PE = 1/5).  $^1\text{H}$  NMR (400 MHz,  $\text{CDCl}_3$ )  $\delta$  7.74 (d,  $J$  = 8.1 Hz, 2H), 7.28 (d,  $J$  = 8.1 Hz, 2H), 5.47 (dd,  $J$  = 17.2, 11.2 Hz, 1H), 5.38 – 5.22 (m, 3H), 5.11 (s, 1H), 4.17 (s, 2H), 4.15 (s, 2H), 3.78 (s, 2H), 2.41 (s, 3H), 0.91 (s, 9H), 0.07 (s, 6H).  $^{13}\text{C}$  NMR (100 MHz,  $\text{CDCl}_3$ )  $\delta$  143.5, 142.3, 135.9, 129.5, 128.0, 127.3, 116.4, 114.2, 84.6, 82.4, 63.7, 49.0, 36.6, 26.0, 21.6, 18.5, -5.3. IR (neat): 2953, 2928, 2856, 1463, 1351, 1257, 1094  $\text{cm}^{-1}$ . HRMS (ESI): calcd. for  $\text{C}_{22}\text{H}_{34}\text{NO}_3\text{Si}$  ( $[\text{M}+\text{H}]^+$ ): 420.2023, found 420.2030.

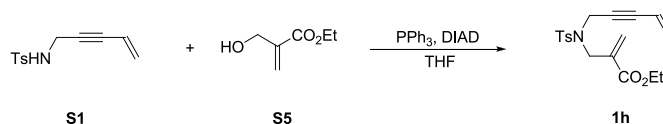

To a stirred solution of **S1**<sup>1</sup> (934.5 mg, 3.97 mmol),  $\text{PPh}_3$  (1.5630 g, 5.96 mmol) in THF (39 mL) was added DIAD (1.2023 g, 5.95 mmol) at 0 °C. After stirring for 5 min, the solution was added **S5**<sup>6</sup> (621.8 mg, 4.78 mmol) in THF (13 mL). The reaction was gradually allowed to warm to room temperature, monitored by TLC, and stirred for 3 h. Upon completion, the reaction mixture was concentrated and the crude product was purified by flash column chromatography on silica gel (eluted with PE/EA 20:1) to afford **1h** (1.1513 g, 83%).

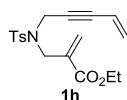

Yellow oil, TLC  $R_f$  = 0.42 (EA/PE = 1/5).  $^1\text{H}$  NMR (400 MHz,  $\text{CDCl}_3$ )  $\delta$  7.76 (d,  $J$  = 8.2 Hz, 2H), 7.29 (d,  $J$  = 8.2 Hz, 2H), 6.39 (d,  $J$  = 1.0 Hz, 1H), 5.93 (d,  $J$  = 1.0 Hz, 1H), 5.56 – 5.42 (m, 1H), 5.39 – 5.28 (m, 2H), 4.26 – 4.18 (m, 4H), 4.07 (s, 2H), 2.41 (s, 3H), 1.31 (t,  $J$  = 7.1 Hz, 3H).  $^{13}\text{C}$  NMR (100 MHz,  $\text{CDCl}_3$ )  $\delta$  165.9, 143.7, 136.0, 135.3, 129.6, 127.9, 127.6, 127.4, 116.3, 84.6, 82.6, 61.2, 47.0, 37.8, 21.6, 14.3. IR (neat): 2956, 2924, 2852, 1721, 1352, 1163, 1094  $\text{cm}^{-1}$ . HRMS (ESI): calcd. for  $\text{C}_{18}\text{H}_{22}\text{NO}_4\text{S}$  ( $[\text{M}+\text{H}]^+$ ): 348.1264, found 348.1271.

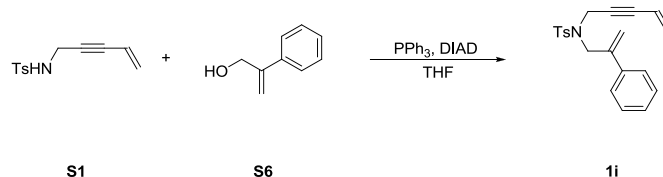

To a stirred solution of **S1**<sup>1</sup> (285.9 mg, 1.22 mmol),  $\text{PPh}_3$  (479.1 mg, 1.83 mmol) in THF (12 mL) was added DIAD (369.4 mg, 1.83 mmol) at 0 °C. After stirring for 5 min, the solution was added **S6**<sup>7</sup> (195.8 mg, 1.46 mmol) in THF (4 mL). The reaction was gradually allowed to warm to room

temperature, monitored by TLC, and stirred for 2 h. Upon completion, the reaction mixture was concentrated and the crude product was purified by flash column chromatography on silica gel (eluted with PE/EA 50:1) to afford **1i** (405.4 mg, 95%).

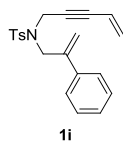

Light yellow solid, TLC  $R_f$  = 0.58 (EA/PE = 1/5), m.p. = 113-116 °C.  $^1\text{H}$  NMR (400 MHz,  $\text{CDCl}_3$ )  $\delta$  7.79 – 7.73 (m, 2H), 7.57 – 7.52 (m, 2H), 7.38 – 7.29 (m, 5H), 5.58 (s, 1H), 5.52 – 5.42 (m, 1H), 5.38 – 5.24 (m, 3H), 4.24 (s, 2H), 4.09 (d,  $J$  = 1.7 Hz, 2H), 2.42 (s, 3H).  $^{13}\text{C}$  NMR (100 MHz,  $\text{CDCl}_3$ )  $\delta$  143.6, 141.5, 137.8, 135.6, 129.5, 128.6, 128.3, 128.1, 127.3, 126.5, 117.3, 116.3, 84.8, 82.3, 50.3, 36.4, 21.6. IR (neat): 2917, 2849, 1462, 1350, 1162, 1094  $\text{cm}^{-1}$ . HRMS (ESI): calcd. for  $\text{C}_{21}\text{H}_{22}\text{NO}_2\text{S}$  ( $[\text{M}+\text{H}]^+$ ): 352.1366, found 352.1365.

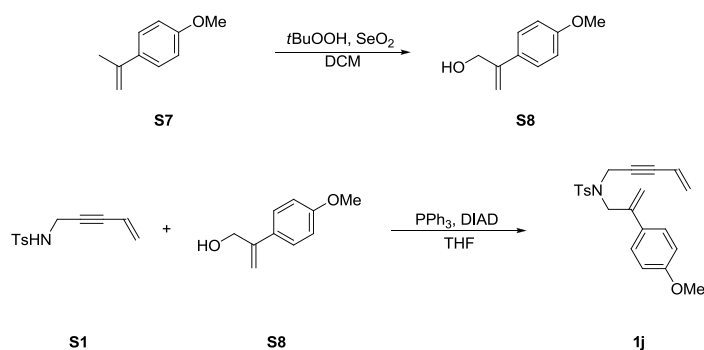

To a stirred solution of  $\text{SeO}_2$  (7.70 g, 69.0 mmol) in DCM (30 mL) was added  $t\text{BuOOH}$  (8.90 g, 69.0 mmol, 70% solution in  $\text{H}_2\text{O}$ ) at 0 °C. After stirring for 10 min, the solution was added **S7**<sup>8</sup> (6.75 g, 46.0 mmol) in DCM (30 mL) at 0 °C. After stirred for 1.5 h, the reaction was quenched by saturated  $\text{NaHCO}_3$  (100 mL) at 0 °C. The reaction mixture was extracted with DCM (3×100 mL) and the combined organic phase was dried over  $\text{Na}_2\text{SO}_4$  and concentrated. The crude product was purified by flash column chromatography on silica gel (eluted with PE/EA 4:1) to afford **S8** (2.94 g, 48%). **S8**<sup>9</sup> is a known substrate.

To a stirred solution of **S1**<sup>1</sup> (235.8 mg, 1.0 mmol) and  $\text{PPh}_3$  (394.1 mg, 1.5 mmol) in THF (10 mL) was added DIAD (305.4 mg, 1.5 mmol) at 0 °C. After stirring for 5 min, the solution was added **S8** (172.4 mg, 1.0 mmol) in THF (4 mL). The reaction was gradually allowed to warm to room temperature, monitored by TLC, and stirred for 3 h. Upon completion, the reaction mixture was concentrated and the crude product was purified by flash column chromatography on silica gel (eluted with PE/EA 20:1) to afford **1j** (262.2 mg, 69%).

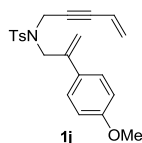

Light yellow solid, TLC  $R_f$  = 0.40 (EA/PE = 1/5), m.p. = 162-163 °C.  $^1\text{H}$  NMR (400 MHz,  $\text{CDCl}_3$ )  $\delta$  7.76 (d,  $J$  = 8.2 Hz, 2H), 7.54 – 7.48 (m, 2H), 7.30 (d,  $J$  = 8.2 Hz, 2H), 6.91 – 6.86 (m, 2H), 5.50 (s, 1H), 5.48 – 5.41 (m, 1H), 5.35 (dd,  $J$  = 11.2, 2.5 Hz, 1H), 5.26 (dd,  $J$  = 17.2, 2.5 Hz, 1H), 5.22 (d,  $J$  = 0.8 Hz, 1H), 4.21 (s, 2H), 4.07 (d,  $J$  = 1.5 Hz, 2H), 3.82 (s, 3H), 2.42 (s, 3H).  $^{13}\text{C}$  NMR (100 MHz,  $\text{CDCl}_3$ )  $\delta$  159.7, 143.6, 140.6, 135.6, 130.1, 129.5, 128.2, 127.7, 127.3, 116.4, 115.7, 113.9, 84.7, 82.3, 55.4, 50.5, 36.3, 21.6. IR (neat): 2955, 2922, 1515, 1349, 1253, 1185, 1163, 1091  $\text{cm}^{-1}$ . HRMS (ESI): calcd. for  $\text{C}_{22}\text{H}_{24}\text{NO}_3\text{S}$  ( $[\text{M}+\text{H}]^+$ ): 382.1471, found 382.1480.

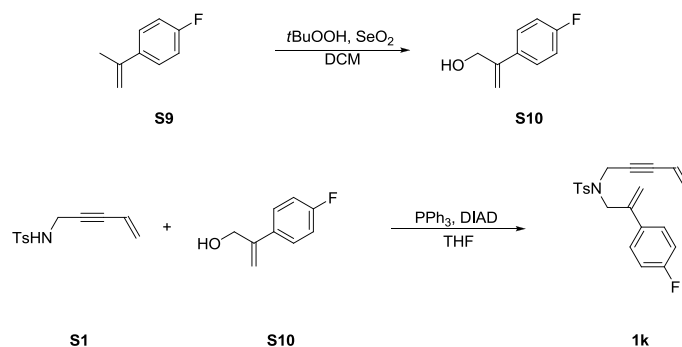

To a stirred solution of  $\text{SeO}_2$  (735.2 mg, 6.6 mmol) in DCM (4 mL) was added  $t\text{BuOOH}$  (856.4 mg, 6.7 mmol, 70% solution in  $\text{H}_2\text{O}$ ) at 0 °C. After stirring for 10 min, the solution was added **S9**<sup>8</sup> (602.5 mg, 4.4 mmol) in DCM (4 mL) at 0 °C. After stirred for 3 h at room temperature, the reaction was quenched by saturated  $\text{NaHCO}_3$  at 0 °C. The reaction mixture was extracted with DCM (3×10 mL) and the combined organic phase was washed with saturated  $\text{Na}_2\text{SO}_3$ , saturated  $\text{NaHCO}_3$  and brine, then dried over  $\text{Na}_2\text{SO}_4$ , then filtered and concentrated. The crude product was purified by flash column chromatography on silica gel (eluted with PE/EA 10:1) to afford **S10** (270.1 mg, 40%). **S10**<sup>10</sup> is a known substrate.

To a stirred solution of **S1**<sup>1</sup> (378.0 mg, 1.61 mmol) and  $\text{PPh}_3$  (633.2 mg, 2.41 mmol) in THF (16 mL) was added DIAD (489.3 mg, 2.42 mmol) at 0 °C. After stirring for 5 min, the solution was added **S10** (270.1 mg, 1.77 mmol) in THF (5 mL). The reaction was gradually allowed to warm to room temperature, monitored by TLC, and stirred for 7 h. Upon completion, the reaction mixture was concentrated and the crude product was purified by flash column chromatography on silica gel (eluted with PE/EA 50:1) to afford **1k** (521.7 mg, 88%).

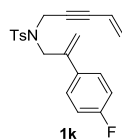

White solid, TLC  $R_f$  = 0.60 (EA/PE = 1/5), m.p. = 97-98 °C.  $^1\text{H}$  NMR (400 MHz,  $\text{CDCl}_3$ )  $\delta$  7.75 (d,  $J$  = 8.3 Hz, 2H), 7.60 – 7.47 (m, 2H), 7.30 (d,  $J$  = 8.0 Hz, 2H), 7.10 – 6.95 (m, 2H), 5.52 (s, 1H), 5.51 – 5.40 (m, 1H), 5.39 – 5.32 (m, 1H), 5.32 – 5.22 (m, 2H), 4.21 (s, 2H), 4.07 (d,  $J$  = 1.4 Hz, 2H), 2.42 (s, 3H).  $^{13}\text{C}$  NMR (100 MHz,  $\text{CDCl}_3$ )  $\delta$  162.9 (d,  $J$  = 247.6 Hz), 143.7, 140.5, 135.6, 133.8 (d,  $J$  = 3.2 Hz), 129.6, 128.3 (d,  $J$  = 8.1 Hz), 128.5, 127.7, 117.3, 116.3, 115.5 (d,  $J$  = 21.5 Hz), 84.9, 82.2, 50.5, 36.4, 21.7. IR (neat): 2955, 2924, 2852, 1351, 1164, 1093  $\text{cm}^{-1}$ . HRMS (ESI): calcd. for  $\text{C}_{21}\text{H}_{21}\text{FNO}_2\text{S}$  ( $[\text{M}+\text{H}]^+$ ): 370.1272, found 370.1275.

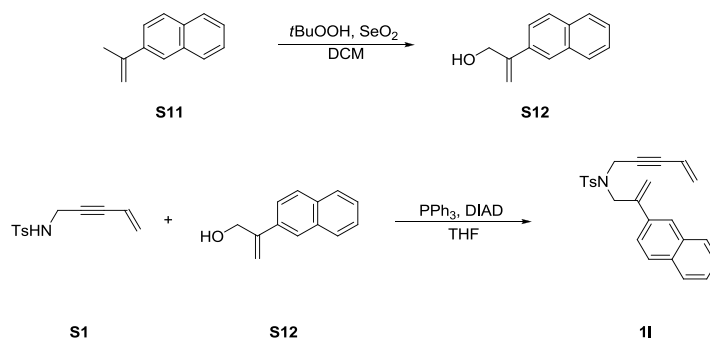

To a stirred solution of  $\text{SeO}_2$  (1.5016 g, 13.5 mmol) in DCM (8 mL) was added  $t\text{BuOOH}$  (1.7453 g, 13.6 mmol, 70% solution in  $\text{H}_2\text{O}$ ) at  $0^\circ\text{C}$ . After stirring for 10 min, the solution was added **S11**<sup>8</sup> (1.5179 g, 9.02 mmol) in DCM (8 mL) at  $0^\circ\text{C}$ . After stirred for 2 h at room temperature, the reaction was quenched by saturated  $\text{NaHCO}_3$  (30 mL) at  $0^\circ\text{C}$ . The reaction mixture was extracted with DCM (3×20 mL) and the combined organic phase was washed with saturated  $\text{Na}_2\text{SO}_3$ , saturated  $\text{NaHCO}_3$  and brine, then dried over  $\text{Na}_2\text{SO}_4$ , then filtered and concentrated. The crude product was purified by flash column chromatography on silica gel (eluted with PE/EA 10:1) to afford **S12** (751.0 mg, 45%). **S12**<sup>11</sup> is a known substrate.

To a stirred solution of **S1**<sup>1</sup> (447.6 mg, 1.90 mmol) and  $\text{PPh}_3$  (748.5 mg, 2.85 mmol) in THF (18 mL) was added DIAD (575.1 mg, 2.84 mmol) at  $0^\circ\text{C}$ . After stirring for 5 min, the solution was added **S12** (386.3 mg, 2.10 mmol) in THF (7 mL). The reaction was gradually allowed to warm to room temperature, monitored by TLC, and stirred for 3 h. Upon completion, the reaction mixture was concentrated and the crude product was purified by flash column chromatography on silica gel (eluted with PE/EA 20:1) to afford **11** (729.9 mg, 96%).

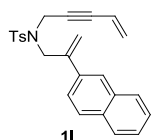

Light yellow solid, TLC  $R_f$  = 0.46 (EA/PE = 1/5), m.p. = 146-149  $^\circ\text{C}$ .  $^1\text{H}$  NMR (400 MHz,  $\text{CDCl}_3$ )  $\delta$  8.03 (s, 1H), 7.93 – 7.72 (m, 5H), 7.66 (d,  $J$  = 8.6 Hz, 1H), 7.51 – 7.43 (m, 2H), 7.29 (d,  $J$  = 8.0 Hz, 2H), 5.72 (s, 1H), 5.57 – 5.25 (m, 4H), 4.36 (s, 2H), 4.12 (s, 2H), 2.42 (s, 3H).  $^{13}\text{C}$  NMR (100 MHz,  $\text{CDCl}_3$ )  $\delta$  143.6, 141.5, 135.8, 135.1, 133.5, 133.3, 129.6, 128.7, 128.18, 128.15, 127.6, 127.4, 126.36, 126.35, 125.8, 124.5, 117.8, 116.4, 84.8, 82.5, 50.5, 36.6, 21.7. IR (neat): 2959, 2928, 2856, 1163, 1092  $\text{cm}^{-1}$ . HRMS (ESI): calcd. for  $\text{C}_{25}\text{H}_{24}\text{NO}_2\text{S}$  ( $[\text{M}+\text{H}]^+$ ): 402.1522, found 402.1525.

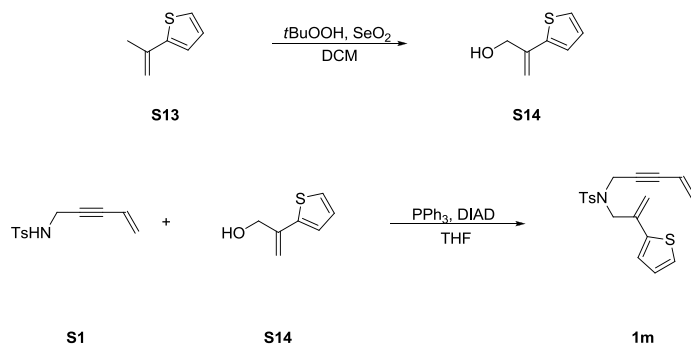

To a stirred solution of  $\text{SeO}_2$  (3.3131 g, 29.9 mmol) in DCM (12 mL) was added  $t\text{BuOOH}$  (3.8445 g, 29.9 mmol, 70% solution in  $\text{H}_2\text{O}$ ) at 0 °C. After stirring for 10 min, the solution was added **S13**<sup>12</sup> (2.4706 g, 19.9 mmol) in DCM (12 mL) at 0 °C. After stirred for 1 h, the reaction was quenched by saturated  $\text{NaHCO}_3$  (40 mL) at 0 °C. The reaction mixture was extracted with DCM (3×20 mL) and the combined organic phase was washed with saturated  $\text{Na}_2\text{SO}_3$ , saturated  $\text{NaHCO}_3$  and brine, then dried over  $\text{Na}_2\text{SO}_4$ , then filtered and concentrated. The crude product was purified by flash column chromatography on silica gel (eluted with PE/EA 10:1) to afford **S14** (408.7 mg, 15%). **S14**<sup>12</sup> is a known substrate.

To a stirred solution of **S1**<sup>1</sup> (492.1 mg, 2.09 mmol) and  $\text{PPh}_3$  (822.9 mg, 3.14 mmol) in THF (20 mL) was added DIAD (635.0 mg, 3.14 mmol) at 0 °C. After stirring for 5 min, the solution was added **S14** (352.4 mg, 2.51 mmol) in THF (7 mL). The reaction was gradually allowed to warm to room temperature, monitored by TLC, and stirred for 5 h. Upon completion, the reaction mixture was concentrated and the crude product was purified by flash column chromatography on silica gel (eluted with PE/EA 50:1) to afford **1m** (711.4 mg, 95%).

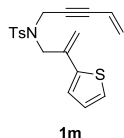

White solid, TLC  $R_f$  = 0.51 (EA/PE = 1/5), m.p. = 68-69 °C.  $^1\text{H}$  NMR (400 MHz,  $\text{CDCl}_3$ )  $\delta$  7.78 (d,  $J$  = 8.1 Hz, 2H), 7.40 (d,  $J$  = 3.5 Hz, 1H), 7.32 (d,  $J$  = 8.1 Hz, 2H), 7.19 (d,  $J$  = 5.1 Hz, 1H), 7.05 – 6.97 (m, 1H), 5.59 (s, 1H), 5.46 (dd,  $J$  = 17.2, 11.2 Hz, 1H), 5.35 (dd,  $J$  = 11.2, 2.3 Hz, 1H), 5.26 (dd,  $J$  = 17.2, 2.3 Hz, 1H), 5.19 (s, 1H), 4.18 (s, 4H), 2.43 (s, 3H).  $^{13}\text{C}$  NMR (100 MHz,  $\text{CDCl}_3$ )  $\delta$  143.7, 141.6, 135.6, 135.2, 129.6, 128.2, 128.0, 127.4, 125.7, 125.0, 116.3, 115.9, 85.0, 82.2, 50.6, 36.5, 21.7. IR (neat): 2952, 2922, 2854, 1351, 1163, 1094  $\text{cm}^{-1}$ . HRMS (ESI): calcd. for  $\text{C}_{19}\text{H}_{20}\text{NO}_2\text{S}_2$  ( $[\text{M}+\text{H}]^+$ ): 358.0930, found 358.0939.

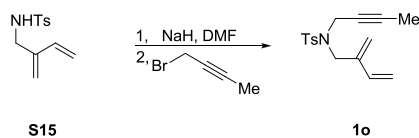

To a suspension of NaH (30.2 mg, 0.76 mmol, 60%) in DMF (1.0 mL) was added **S15**<sup>13</sup> (58.8 mg, 0.25 mmol) in DMF (1.5 mL) at 0 °C. After stirred for 30 min, a solution of 1-bromobut-2-yne (60  $\mu\text{L}$ , 0.67 mmol) was added at 0 °C and the reaction mixture was allowed to warm to room

temperature. The reaction was monitored by TLC and stirred for 2 h. Upon completion, saturated  $\text{NH}_4\text{Cl}$  (2 mL) was added to quench the reaction. The resulting mixture was extracted with ether (3×10 mL) and the combined organic phase was washed with saturated  $\text{NaCl}$ , dried over  $\text{Na}_2\text{SO}_4$ , filtered, and concentrated. The crude product was purified by flash column chromatography on silica gel (eluted with PE/EA 20:1) to afford **1o** (56.4 mg, 79%).

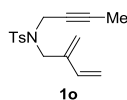

Colorless oil, TLC  $R_f$  = 0.49 (EA/PE = 1/5).  $^1\text{H}$  NMR (400 MHz,  $\text{CDCl}_3$ )  $\delta$  7.76 (d,  $J$  = 8.2 Hz, 2H), 7.31 (d,  $J$  = 8.2 Hz, 2H), 6.35 (dd,  $J$  = 17.7, 11.1 Hz, 1H), 5.62 (d,  $J$  = 17.7 Hz, 1H), 5.23 (s, 1H), 5.22 (s, 1H), 5.17 (d,  $J$  = 11.1 Hz, 1H), 4.06 – 3.96 (m, 2H), 3.95 (s, 2H), 2.43 (s, 3H), 1.52 – 1.42 (m, 3H).  $^{13}\text{C}$  NMR (100 MHz,  $\text{CDCl}_3$ )  $\delta$  143.4, 139.6, 135.82, 135.78, 129.2, 128.1, 119.8, 116.2, 81.9, 71.4, 47.8, 36.2, 21.5, 3.2. IR (neat): 1597, 1347, 1306, 1162, 1094  $\text{cm}^{-1}$ . HRMS (ESI): calcd. for  $\text{C}_{16}\text{H}_{19}\text{NaNO}_2\text{S}$  ( $[\text{M}+\text{Na}]^+$ ): 312.1029, found 312.1026.

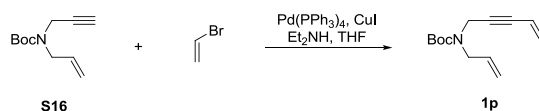

$\text{CuI}$  (30.6 mg, 0.16 mmol) and  $\text{Pd(PPh}_3)_4$  (69.2 mg, 0.06 mmol) were dissolved in  $\text{Et}_2\text{NH}$  (2.0 mL). **S16**<sup>14</sup> (783.0 mg, 4.0 mmol) in THF (6.0 mL) and bromoethene (8.0 mL, 1.0 M in THF) was added to the solution at 0 °C. The reaction was gradually allowed to warm to room temperature, and was continued for another 13 h (TLC indicated that the reaction was completed). The reaction solution was then added to water (50 mL) at 0 °C. The resulting mixture was extracted with ether (3×30 mL), and the combined organic phase was washed with brine, dried over  $\text{Na}_2\text{SO}_4$ , filtered and concentrated. The crude product was purified by flash column chromatography on silica gel (eluted with PE/EA 50:1) to afford **1p** (775.0 mg, 87%).

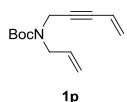

Light yellow oil, TLC  $R_f$  = 0.53 (EA/PE = 1/10).  $^1\text{H}$  NMR (400 MHz,  $\text{CD}_2\text{Cl}_2$ )  $\delta$  5.85 – 5.74 (m, 2H), 5.61 (dd,  $J$  = 17.6, 2.2 Hz, 1H), 5.47 (dd,  $J$  = 11.1, 2.2 Hz, 1H), 5.20 – 5.12 (m, 2H), 4.12 (s, 2H), 3.91 (d,  $J$  = 5.7 Hz, 2H), 1.44 (s, 9H).  $^{13}\text{C}$  NMR (100 MHz,  $\text{CD}_2\text{Cl}_2$ )  $\delta$  155.1, 134.0, 127.3, 117.2, 116.9, 86.3, 82.0, 80.3, 48.9, 36.4, 28.4. IR (neat): 2978, 2923, 1699, 1453, 1404, 1366, 1246, 1170, 1144, 920  $\text{cm}^{-1}$ . HRMS (ESI): calcd. for  $\text{C}_{13}\text{H}_{20}\text{NO}_2$  ( $[\text{M}+\text{H}]^+$ ): 222.1489, found 222.1482.

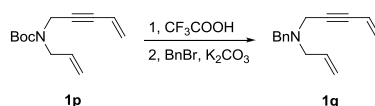

**1p** (190.6 mg, 0.86 mmol) was dissolved in DCM (1.5 mL), then  $\text{CF}_3\text{COOH}$  (0.25 mL, 3.4 mmol) was added to the solution at 0 °C. The reaction was gradually allowed to warm to room temperature. The reaction was monitored by TLC and stirred for 2 h. Upon completion, the reaction was quenched by saturated  $\text{NaHCO}_3$  (10 mL). The resulting mixture was extracted with DCM (3×5 mL), and the

combined organic phase was washed with brine, dried over Na<sub>2</sub>SO<sub>4</sub>, filtered and concentrated. The crude product was used in the next step directly.

The crude product was dissolved in CH<sub>3</sub>CN (4.0 mL), then K<sub>2</sub>CO<sub>3</sub> (238.1 mg, 1.7 mmol) and BnBr (0.12 mL, 1.0 mmol) were added to the solution at room temperature. The reaction was monitored by TLC and stirred for 3 h at room temperature. Upon completion, the solution was added to water (40 mL). The resulting mixture was extracted with ether (3×20 mL), and the combined organic phase was washed with brine, dried over Na<sub>2</sub>SO<sub>4</sub>, filtered and concentrated. The crude product was purified by flash column chromatography on silica gel (eluted with PE/EA 50:1) to afford **1q** (115.8 mg, 64%).

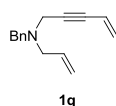

Colorless oil, TLC  $R_f$  = 0.68 (EA/PE = 1/5). <sup>1</sup>H NMR (400 MHz, CD<sub>2</sub>Cl<sub>2</sub>)  $\delta$  7.38 – 7.29 (m, 4H), 7.29 – 7.21 (m, 1H), 5.97 – 5.80 (m, 2H), 5.64 (dd,  $J$  = 17.5, 2.1 Hz, 1H), 5.47 (dd,  $J$  = 11.1, 2.1 Hz, 1H), 5.28 (dd,  $J$  = 17.2, 1.6 Hz, 1H), 5.17 (d,  $J$  = 10.1 Hz, 1H), 3.64 (s, 2H), 3.40 (d,  $J$  = 1.0 Hz, 2H), 3.18 (d,  $J$  = 6.3 Hz, 2H). <sup>13</sup>C NMR (100 MHz, CD<sub>2</sub>Cl<sub>2</sub>)  $\delta$  139.4, 136.3, 129.4, 128.6, 127.4, 126.8, 117.9, 117.5, 85.7, 84.5, 57.7, 57.0, 42.4. IR (neat): 3065, 3029, 2920, 2815, 1643, 1606, 1452, 1424, 1327, 1147, 1116, 973, 921 cm<sup>-1</sup>. HRMS (ESI): calcd. for C<sub>15</sub>H<sub>18</sub>N ([M+H]<sup>+</sup>): 212.1434, found 212.1434.

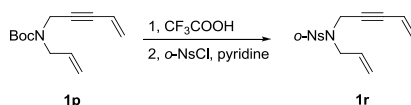

**1p** (216.3 mg, 0.98 mmol) was dissolved in DCM (2.0 mL), then CF<sub>3</sub>COOH (0.29 mL, 3.9 mmol) was added to the solution at 0 °C. The reaction was gradually allowed to warm to room temperature. The reaction was monitored by TLC and stirred for 2 h. Upon completion, the reaction was quenched by saturated NaHCO<sub>3</sub> (10 mL). The resulting mixture was extracted with DCM (3×10 mL), and the combined organic phase was washed with brine, dried over Na<sub>2</sub>SO<sub>4</sub>, filtered and concentrated. The crude product was used in the next step directly.

The crude product was dissolved in DCM (5.0 mL), then pyridine (0.16 mL, 2.0 mmol) and *o*-NsCl (326.0 mg, 1.5 mmol) were added to the solution at room temperature. The reaction was monitored by TLC and stirred for 3 h at room temperature. Upon completion, the solution was added to water (10 mL). The resulting mixture was extracted with DCM (3×10 mL), and the combined organic phase was washed with brine, dried over Na<sub>2</sub>SO<sub>4</sub>, filtered and concentrated. The crude product was purified by flash column chromatography on silica gel (eluted with PE/EA 5:1) to afford **1r** (119.9 mg, 40%).

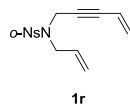

Yellow oil, TLC  $R_f$  = 0.21 (EA/PE = 1/5). <sup>1</sup>H NMR (400 MHz, CDCl<sub>3</sub>)  $\delta$  8.11 – 8.03 (m, 1H), 7.73 – 7.60 (m, 3H), 5.79 – 5.67 (m, 1H), 5.65 – 5.55 (m, 1H), 5.49 – 5.39 (m, 2H), 5.31 (dd,  $J$  = 17.1, 1.0 Hz, 1H), 5.26 (dd,  $J$  = 10.1, 1.0 Hz, 1H), 4.25 (d,  $J$  = 1.3 Hz, 2H), 4.02 (d,  $J$  = 6.4 Hz, 2H). <sup>13</sup>C

NMR (100 MHz, CDCl<sub>3</sub>)  $\delta$  148.3, 133.8, 133.0, 131.8, 131.7, 131.2, 128.0, 124.2, 120.4, 116.2, 84.4, 82.6, 49.7, 36.8. IR (neat): 3032, 3000, 2933, 1553, 1445, 1368, 1173, 1132, 1074, 936, 911 cm<sup>-1</sup>. HRMS (ESI): calcd. for C<sub>14</sub>H<sub>15</sub>N<sub>2</sub>O<sub>4</sub>S ([M+H]<sup>+</sup>): 307.0747, found 307.0745.

### III. Reaction Condition Screening

**Table S1:** Optimization of Au(I)-Catalyzed Cycloisomerization

1a  2a

| entry <sup>a</sup> | cat.                                          | x  | solvent            | yield (%) <sup>b</sup> | conv. (%) <sup>c</sup> |
|--------------------|-----------------------------------------------|----|--------------------|------------------------|------------------------|
| 1                  | Au(PPh <sub>3</sub> )SbF <sub>6</sub>         | 10 | DCE                | trace                  | 100                    |
| 2                  | Au(IPr)SbF <sub>6</sub>                       | 10 | DCE                | 21                     | 100                    |
| 3                  | Au(L)SbF <sub>6</sub> <sup>d</sup>            | 10 | DCE                | trace                  | 100                    |
| 4                  | Au(JohnPhos)SbF <sub>6</sub>                  | 10 | DCE                | 52                     | 100                    |
| 5                  | Au(JohnPhos)OTf                               | 10 | DCE                | 56                     | 96                     |
| 6                  | Au(JohnPhos)NTf <sub>2</sub>                  | 10 | DCE                | 52                     | 97                     |
| 7                  | Au(JohnPhos)SbF <sub>6</sub>                  | 10 | DCM                | 43                     | 97                     |
| 8                  | Au(JohnPhos)SbF <sub>6</sub>                  | 10 | THF                | 56                     | 96                     |
| 9                  | Au(JohnPhos)SbF <sub>6</sub>                  | 10 | toluene            | 26                     | 48                     |
| 10                 | Au(JohnPhos)SbF <sub>6</sub>                  | 10 | CH <sub>3</sub> CN | N.R.                   | --                     |
| 11                 | Au(JohnPhos)SbF <sub>6</sub>                  | 5  | DCE                | 69                     | 94                     |
| 12                 | Au(JohnPhos)MeCNSbF <sub>6</sub> <sup>e</sup> | 5  | DCE                | 56                     | 92                     |

<sup>a</sup> Conditions: 0.1 mmol **1a**, x mol % cat., solvent (0.05 M), 30 °C, 12 h. <sup>b</sup> Isolated yield. <sup>c</sup> Based on recovered starting material. <sup>d</sup> L = tris(2,4-di-*t*-butylphenyl)phosphate. <sup>e</sup> Commercially available Echavarren's catalyst.

We also tested the Au(I)-catalyzed cycloisomerization using Boc, Bn, and *o*-Ns as the N-protecting groups (substrates **1p**, **1q** and **1r**), finding that no cyclopropanation took place (see Part IV).

**Table S2:** Optimization of Au(I)-Catalyzed Cycloisomerization of **1h**

1h  2h

| entry <sup>a</sup> | x  | time (h) | yield (%) <sup>b</sup> | conv. (%) <sup>c</sup> |
|--------------------|----|----------|------------------------|------------------------|
| 1                  | 5  | 14       | 42                     | 100                    |
| 2                  | 10 | 14       | 46                     | 100                    |

<sup>a</sup> Conditions: 0.1 mmol **1h**, x mol % cat., solvent (0.05 M), 30 °C. <sup>b</sup> Isolated yield. <sup>c</sup> Based on recovered starting material.

**Table S3:** Optimization of Rh(I)-Catalyzed [5+1] Cycloaddition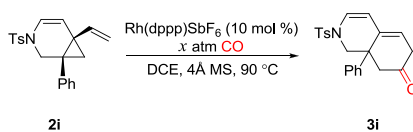

| entry <sup>a</sup> | <i>x</i> | Mole ratio of dppp to Rh | time (h) | yield (%) <sup>b</sup> |
|--------------------|----------|--------------------------|----------|------------------------|
| 1                  | 0.2      | 1.2                      | 16       | 61                     |
| 2                  | 0.2      | 1.0                      | 16       | 78                     |
| 3 <sup>c</sup>     | 0.2      | 1.0                      | 16       | 58                     |
| 4                  | 0.1      | 1.0                      | 16       | 39                     |
| 5                  | 1.0      | 1.0                      | 12       | 74                     |

<sup>a</sup> Conditions: 0.1 mmol **2i**, 10 mol % Rh(dppp)SbF<sub>6</sub>, DCE (0.05 M), 0.08g 4Å MS, *x* atm CO, 90 °C. <sup>b</sup> Isolated yield. <sup>c</sup> Without 4Å MS.

**Table S4:** Test of CO Pressure on affecting the [5+1] Cycloaddition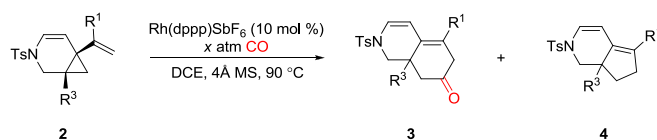

| entry <sup>a</sup> | R <sup>1</sup> | R <sup>3</sup>     | <i>x</i> | time (h) | yield <b>3</b> (%) <sup>b</sup> | yield <b>4</b> (%) <sup>b</sup> | conv. (%) <sup>c</sup> |
|--------------------|----------------|--------------------|----------|----------|---------------------------------|---------------------------------|------------------------|
| 1                  | Me             | H                  | 0.2      | 12       | 56                              | 29                              | 100                    |
| 2                  | Me             | H                  | 0.5      | 24       | 32                              | 14                              | 47                     |
| 3                  | H              | CH <sub>2</sub> OH | 0.2      | 3        | 40                              | 36                              | 100                    |
| 4                  | H              | CH <sub>2</sub> OH | 0.5      | 24       | 50                              | trace                           | /                      |
| 5                  | H              | CO <sub>2</sub> Et | 0.2      | 1        | 26                              | 62                              | 100                    |
| 6                  | H              | CO <sub>2</sub> Et | 0.5      | 24       | trace                           | 0                               | 24                     |

<sup>a</sup> Conditions: 0.1 mmol **2**, 10 mol % Rh(dppp)SbF<sub>6</sub>, DCE (0.05 M), 0.08 g 4Å MS, *x* atm CO, 90 °C. <sup>b</sup> Isolated yield. <sup>c</sup> Based on recovered starting material.

**Table S5:** Optimization of Rh(I)-Catalyzed Rearrangement of VCPs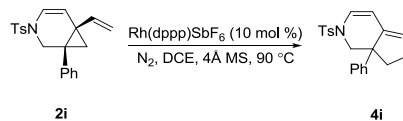

| entry <sup>a</sup> | Mole ratio of dppp to Rh | time (h) | yield (%) <sup>b</sup> |
|--------------------|--------------------------|----------|------------------------|
| 1                  | 1.2                      | 1        | 84                     |
| 2                  | 1.0                      | 1        | 80                     |

<sup>a</sup> Conditions: 0.1 mmol **2i**, 10 mol % Rh(dppp)SbF<sub>6</sub>, DCE (0.05 M), 0.08g 4Å MS, 90 °C. <sup>b</sup> Isolated yield.

#### IV. General Procedure and Experimental Details of Au(I)-Catalyzed Cycloisomerization

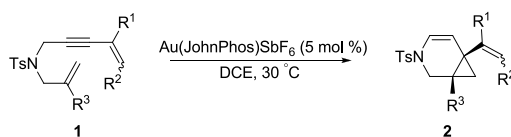

##### General procedure A: (5 mol % catalyst)

**Preparation of solution of cationic Au(I) catalyst:** Anhydrous DCE (2.0 mL) was added to a mixture of Au(JohnPhos)Cl (2.6 mg, 4.9  $\mu$ mol) and AgSbF<sub>6</sub> (2.1 mg, 6.1  $\mu$ mol) under argon. The mixture was stirred at room temperature for 30 min. The resulting suspension was left to stand until the formed AgCl precipitated. The supernatant was used in Au(I)-catalyzed cycloisomerization reactions as the catalyst precursor.

**General procedure of Au(I)-catalyzed cycloisomerization:** Under argon, the above Au(I)<sup>+</sup> solution (2.0 mL) was added to a flame-dried glassware containing **1** (0.1 mmol) at 30 °C. The reaction was monitored by TLC. Upon completion, the reaction mixture was purified by flash column chromatography on silica gel to afford **2**.

##### General procedure B: (10 mol % catalyst)

**Preparation of solution of cationic Au(I) catalyst:** Anhydrous DCE (2.0 mL) was added to a mixture of Au(JohnPhos)Cl (5.3 mg, 10.0  $\mu$ mol) and AgSbF<sub>6</sub> (4.1 mg, 11.9  $\mu$ mol) under argon. The mixture was stirred at room temperature for 30 min. The resulting suspension was left to stand until the formed AgCl precipitated. The supernatant was used in Au(I)-catalyzed cycloisomerization reactions as the catalyst precursor.

**General procedure of Au(I)-catalyzed cycloisomerization:** Under argon, the above Au(I)<sup>+</sup> solution (2.0 mL) was added to a flame-dried glassware containing **1** (0.1 mmol) at 30 °C. The reaction was monitored by TLC. Upon completion, the reaction mixture was purified by flash column chromatography on silica gel to afford **2**.

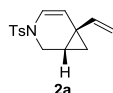

Run 1: Following general procedure A, 27.4 mg **1a** was used, 12 h. After flash column chromatography on silica gel (eluted with PE/EA 20:1), 18.6 mg **2a** was obtained in 68% yield and 1.1 mg **1a** was recovered.

Run 2: Following general procedure A, 27.9 mg **1a** was used, 12 h. After flash column chromatography on silica gel (eluted with PE/EA 20:1), 19.5 mg **2a** was obtained in 70% yield and 2.1 mg **1a** was recovered.

Average yield: 69%.

Colorless oil, TLC  $R_f$  = 0.34 (EA/PE = 1/10). <sup>1</sup>H NMR (400 MHz, CDCl<sub>3</sub>)  $\delta$  7.65 (d,  $J$  = 8.2 Hz, 2H), 7.31 (d,  $J$  = 8.2 Hz, 2H), 6.41 (d,  $J$  = 8.3 Hz, 1H), 5.46 (d,  $J$  = 8.3 Hz, 1H), 5.43 (dd,  $J$  = 17.3, 10.6 Hz, 1H), 4.99 (d,  $J$  = 17.3 Hz, 1H), 4.93 (d,  $J$  = 10.6 Hz, 1H), 3.93 (d,  $J$  = 11.6 Hz, 1H), 3.03 (dd,  $J$  = 11.6, 2.7 Hz, 1H), 2.42 (s, 3H), 1.62 – 1.51 (m, 1H), 0.97 (dd,  $J$  = 8.6, 4.5 Hz, 1H), 0.85 – 0.78 (m, 1H). <sup>13</sup>C NMR (100 MHz, CDCl<sub>3</sub>)  $\delta$  143.9, 141.8, 134.9, 129.9, 127.2, 121.4, 111.5, 111.4, 40.6, 27.7, 22.8, 21.7, 19.7. IR (neat): 2921, 1630, 1349, 1166, 1113, 1090, 1002 cm<sup>-1</sup>. HRMS (ESI): calcd. for C<sub>15</sub>H<sub>18</sub>NO<sub>2</sub>S ([M+H]<sup>+</sup>): 276.1053, found 276.1051.

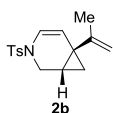

Run 1: Following general procedure A, 28.2 mg **1b** was used, 12 h. After flash column chromatography on silica gel (eluted with PE/EA 50:1), 20.9 mg **2b** was obtained in 74% yield and 2.5 mg **1b** was recovered.

Run 2: Following general procedure A, 28.4 mg **1b** was used, 12 h. After flash column chromatography on silica gel (eluted with PE/EA 50:1), 21.5 mg **2b** was obtained in 76% yield and 2.8 mg **1b** was recovered.

Average yield: 75%.

Colorless oil, TLC  $R_f$  = 0.37 (EA/PE = 1/10).  $^1\text{H}$  NMR (400 MHz,  $\text{CDCl}_3$ )  $\delta$  7.66 (d,  $J$  = 8.2 Hz, 2H), 7.31 (d,  $J$  = 8.2 Hz, 2H), 6.39 (d,  $J$  = 8.3 Hz, 1H), 5.35 (d,  $J$  = 8.3 Hz, 1H), 4.77 – 4.74 (m, 1H), 4.73 – 4.69 (m, 1H), 3.92 (d,  $J$  = 11.7 Hz, 1H), 3.05 (dd,  $J$  = 11.7, 2.7 Hz, 1H), 2.43 (s, 3H), 1.66 (s, 3H), 1.60 – 1.55 (m, 1H), 1.05 (dd,  $J$  = 8.8, 4.5 Hz, 1H), 0.64 – 0.56 (m, 1H).  $^{13}\text{C}$  NMR (100 MHz,  $\text{CDCl}_3$ )  $\delta$  146.3, 143.9, 135.1, 129.9, 127.2, 121.1, 113.7, 110.6, 40.8, 25.8, 23.2, 21.7, 20.6, 20.2. IR (neat): 2922, 1729, 1349, 1271, 1168, 1110, 1089, 1076, 1004  $\text{cm}^{-1}$ . HRMS (ESI): calcd. for  $\text{C}_{16}\text{H}_{20}\text{NO}_2\text{S}$  ( $[\text{M}+\text{H}]^+$ ): 290.1209, found 290.1212.

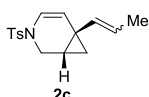

Run 1: Following general procedure A, 28.4 mg **1c** was used, 12 h. After flash column chromatography on silica gel (eluted with PE/EA 50:1), 24.8 mg **2c** was obtained in 87% yield,  $Z/E$  = 1/3.5.

Run 2: Following general procedure A, 29.6 mg **1c** was used, 12 h. After flash column chromatography on silica gel (eluted with PE/EA 50:1), 26.5 mg **2c** was obtained in 90% yield,  $Z/E$  = 1/3.5.

Average yield: 88%,  $Z/E$  = 1/3.5.

Colorless oil, TLC  $R_f$  = 0.41 (EA/PE = 1/10). (**Z**)-**2c**:  $^1\text{H}$  NMR (400 MHz,  $\text{CDCl}_3$ )  $\delta$  7.64 (d,  $J$  = 8.0 Hz, 2H), 7.30 (d,  $J$  = 8.0 Hz, 2H), 6.41 – 6.33 (m, 1H), 5.54 – 5.34 (m, 2H), 5.10 (dd,  $J$  = 15.4, 1.0 Hz, 1H), 3.89 (d,  $J$  = 11.5 Hz, 1H), 3.03 (dd,  $J$  = 11.5, 2.6 Hz, 1H), 2.42 (s, 3H), 1.65 – 1.61 (m, 3H), 1.54 – 1.46 (m, 1H), 0.89 (dd,  $J$  = 8.6, 4.5 Hz, 1H), 0.74 – 0.68 (m, 1H). (**E**)-**2c**:  $^1\text{H}$  NMR (400 MHz,  $\text{CDCl}_3$ )  $\delta$  7.65 (d,  $J$  = 8.2 Hz, 2H  $\times$  3.5), 7.31 (d,  $J$  = 8.2 Hz, 2H  $\times$  3.5), 6.33 – 6.29 (m, 1H  $\times$  3.5), 5.54 – 5.34 (m, 2H  $\times$  3.5), 5.29 (d,  $J$  = 8.1 Hz, 1H  $\times$  3.5), 3.91 (d,  $J$  = 11.7 Hz, 1H  $\times$  3.5), 3.11 (dd,  $J$  = 11.7, 2.5 Hz, 1H  $\times$  3.5), 2.42 (s, 3H  $\times$  3.5), 1.65 – 1.61 (m, 3H  $\times$  3.5), 1.54 – 1.46 (m, 1H  $\times$  3.5), 0.83 (dd,  $J$  = 8.6, 4.3 Hz, 1H  $\times$  3.5), 0.74 – 0.68 (m, 1H  $\times$  3.5).  $^{13}\text{C}$  NMR (100 MHz,  $\text{CDCl}_3$ )  $\delta$  143.9, 143.8, 135.0, 134.8, 134.4, 132.7, 129.9, 128.8, 127.2, 127.1, 122.8, 121.0, 119.9, 116.0, 112.6, 40.8, 40.7, 27.3, 27.0, 22.43, 22.35, 21.67, 21.65, 18.7, 17.9, 16.5, 14.3. IR (neat): 1637, 1348, 1274, 1167, 1113, 1091, 1043, 1006  $\text{cm}^{-1}$ . HRMS (ESI): calcd. for  $\text{C}_{16}\text{H}_{19}\text{NaNO}_2\text{S}$  ( $[\text{M}+\text{Na}]^+$ ): 312.1029, found 312.1033.

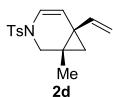

Run 1: Following general procedure A, 29.4 mg **1d** was used, 1 h. After flash column chromatography on silica gel (eluted with PE/EA 50:1), 27.1 mg **2d** was obtained in 92% yield.

Run 2: Following general procedure A, 29.0 mg **1d** was used, 1 h. After flash column chromatography on silica gel (eluted with PE/EA 50:1), 26.8 mg **2d** was obtained in 92% yield.

Average yield: 92%.

Colorless oil, TLC  $R_f$  = 0.43 (EA/PE = 1/10).  $^1\text{H}$  NMR (500 MHz,  $\text{CDCl}_3$ )  $\delta$  7.66 (d,  $J$  = 8.2 Hz, 2H), 7.31 (d,  $J$  = 8.2 Hz, 2H), 6.37 (d,  $J$  = 8.1 Hz, 1H), 5.60 (dd,  $J$  = 17.2, 10.6 Hz, 1H), 5.39 (d,  $J$  = 8.1 Hz, 1H), 5.12 – 5.03 (m, 2H), 3.83 (d,  $J$  = 11.5 Hz, 1H), 2.69 (d,  $J$  = 11.5 Hz, 1H), 2.42 (s, 3H), 1.09 (s, 3H), 0.99 (d,  $J$  = 4.6 Hz, 1H), 0.83 (d,  $J$  = 4.6 Hz, 1H).  $^{13}\text{C}$  NMR (125 MHz,  $\text{CDCl}_3$ )  $\delta$  143.9, 138.7, 135.1, 129.9, 127.2, 121.2, 114.9, 113.4, 46.5, 32.7, 27.0, 25.3, 21.7, 18.1. IR (neat): 2920, 1351, 1272, 1170, 1112, 1003  $\text{cm}^{-1}$ . HRMS (ESI): calcd. for  $\text{C}_{16}\text{H}_{20}\text{NO}_2\text{S}$  ( $[\text{M}+\text{H}]^+$ ): 290.1209, found 290.1210.

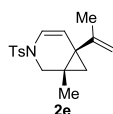

Run 1: Following general procedure A, 29.7 mg **1e** was used, 1 h. After flash column chromatography on silica gel (eluted with PE/EA 50:1), 29.5 mg **2e** was obtained in 99% yield.

Run 2: Following general procedure A, 30.7 mg **1e** was used, 1 h. After flash column chromatography on silica gel (eluted with PE/EA 50:1), 29.1 mg **2e** was obtained in 95% yield.

Average yield: 97%.

**2e** is a known substrate<sup>4</sup>.

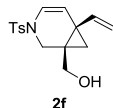

Run 1: Following general procedure A, 31.1 mg **1f** was used, 1 h. After flash column chromatography on silica gel (eluted with PE/EA 3:1), 21.0 mg **2f** was obtained in 68% yield.

Run 2: Following general procedure A, 30.7 mg **1f** was used, 1 h. After flash column chromatography on silica gel (eluted with PE/EA 3:1), 21.8 mg **2f** was obtained in 71% yield.

Average yield: 70%.

Colorless oil, TLC  $R_f$  = 0.41 (EA/PE = 1/2).  $^1\text{H}$  NMR (400 MHz,  $\text{CDCl}_3$ )  $\delta$  7.67 (d,  $J$  = 8.1 Hz, 2H), 7.32 (d,  $J$  = 8.1 Hz, 2H), 6.43 (d,  $J$  = 8.2 Hz, 1H), 5.74 (dd,  $J$  = 17.4, 10.4 Hz, 1H), 5.36 (d,  $J$  = 8.2 Hz, 1H), 5.25 – 5.11 (m, 2H), 3.96 (d,  $J$  = 11.4 Hz, 1H), 3.72 (d,  $J$  = 12.2 Hz, 1H), 3.52 (d,  $J$  = 12.2 Hz, 1H), 3.10 (d,  $J$  = 11.4 Hz, 1H), 2.42 (s, 3H), 1.58 – 1.38 (br. s, 1H), 1.14 (d,  $J$  = 4.9 Hz, 1H), 1.06 (d,  $J$  = 4.9 Hz, 1H).  $^{13}\text{C}$  NMR (100 MHz,  $\text{CDCl}_3$ )  $\delta$  144.1, 137.9, 134.8, 130.0, 127.3, 122.0, 116.7, 112.6, 65.5, 43.0, 38.6, 25.0, 24.7, 21.7. IR (neat): 2953, 2923, 2852, 1462, 1168, 1091, 1022  $\text{cm}^{-1}$ . HRMS (ESI): calcd. for  $\text{C}_{16}\text{H}_{20}\text{NO}_3\text{S}$  ( $[\text{M}+\text{H}]^+$ ): 306.1158, found 306.1166.

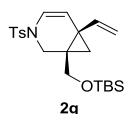

Run 1: Following general procedure A, 41.7 mg **1g** was used, 1 h. After flash column chromatography on silica gel (eluted with PE/EA 50:1), 29.6 mg **2g** was obtained in 71% yield.

Run 2: Following general procedure A, 41.8 mg **1g** was used, 1 h. After flash column chromatography on silica gel (eluted with PE/EA 50:1), 31.6 mg **2g** was obtained in 76% yield.

Average yield: 74%.

Colorless oil, TLC  $R_f$  = 0.50 (EA/PE = 1/10).  $^1\text{H}$  NMR (400 MHz,  $\text{CDCl}_3$ )  $\delta$  7.66 (d,  $J$  = 8.2 Hz, 2H), 7.31 (d,  $J$  = 8.2 Hz, 2H), 6.40 (d,  $J$  = 8.2 Hz, 1H), 5.67 (dd,  $J$  = 17.0, 10.7 Hz, 1H), 5.34 (d,  $J$  = 8.2 Hz, 1H), 5.16 – 5.08 (m, 1H), 5.08 – 5.00 (m, 1H), 3.93 (d,  $J$  = 11.6 Hz, 1H), 3.55 (d,  $J$  = 10.9 Hz, 1H), 3.48 (d,  $J$  = 10.9 Hz, 1H), 2.98 (d,  $J$  = 11.6 Hz, 1H), 2.42 (s, 3H), 0.95 (d,  $J$  = 4.9 Hz, 1H), 0.89 (d,  $J$  = 4.9 Hz, 1H), 0.84 (s, 9H), -0.01 (s, 3H), -0.02 (s, 3H).  $^{13}\text{C}$  NMR (100 MHz,  $\text{CDCl}_3$ )  $\delta$  143.9, 137.8, 134.8, 129.9, 127.2, 121.5, 115.6, 113.5, 64.8, 43.4, 37.7, 25.9, 25.0, 24.2, 21.7, 18.3, -5.3. IR (neat): 2957, 2924, 2853, 1464, 1169, 1020  $\text{cm}^{-1}$ . HRMS (ESI): calcd. for  $\text{C}_{22}\text{H}_{34}\text{NO}_3\text{SSi}$  ( $[\text{M}+\text{H}]^+$ ): 420.2023, found 420.2033.

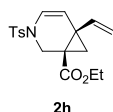

Run 1: Following general procedure A, 34.6 mg **1h** was used, 14 h. After flash column chromatography on silica gel (eluted with PE/EA 20:1), 14.8 mg **2h** was obtained in 43% yield.

Run 2: Following general procedure A, 33.9 mg **1h** was used, 14 h. After flash column chromatography on silica gel (eluted with PE/EA 20:1), 13.8 mg **2h** was obtained in 41% yield.

Average yield: 42%.

Colorless oil, TLC  $R_f$  = 0.30 (EA/PE = 1/10).  $^1\text{H}$  NMR (400 MHz,  $\text{CDCl}_3$ )  $\delta$  7.67 (d,  $J$  = 8.1 Hz, 2H), 7.33 (d,  $J$  = 8.1 Hz, 2H), 6.50 (d,  $J$  = 8.2 Hz, 1H), 5.74 (dd,  $J$  = 17.4, 10.7 Hz, 1H), 5.47 (d,  $J$  = 8.2 Hz, 1H), 5.17 (d,  $J$  = 17.4 Hz, 1H), 5.12 (d,  $J$  = 10.7 Hz, 1H), 4.18 – 4.07 (m, 2H), 4.02 (d,  $J$  = 12.2 Hz, 1H), 3.42 (d,  $J$  = 12.2 Hz, 1H), 2.43 (s, 3H), 1.81 (d,  $J$  = 4.9 Hz, 1H), 1.28 (d,  $J$  = 4.9 Hz, 1H), 1.22 (t,  $J$  = 7.1 Hz, 3H).  $^{13}\text{C}$  NMR (100 MHz,  $\text{CDCl}_3$ )  $\delta$  169.4, 144.2, 136.6, 134.9, 130.1, 127.2, 123.6, 116.5, 112.2, 61.4, 42.1, 40.5, 28.8, 26.0, 21.7, 14.4. IR (neat): 2954, 2925, 1730, 1291, 1168, 1103  $\text{cm}^{-1}$ . HRMS (ESI): calcd. for  $\text{C}_{18}\text{H}_{22}\text{NO}_4\text{S}$  ( $[\text{M}+\text{H}]^+$ ): 348.1264, found 348.1271.

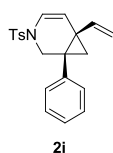

Run 1: Following general procedure A, 34.6 mg **1i** was used, 1 h. After flash column chromatography on silica gel (eluted with PE/EA 50:1), 31.6 mg **2i** was obtained in 91% yield.

Run 2: Following general procedure A, 35.5 mg **1i** was used, 1 h. After flash column chromatography on silica gel (eluted with PE/EA 50:1), 33.7 mg **2i** was obtained in 95% yield.

Average yield: 93%.

Light yellow solid, TLC  $R_f$  = 0.39 (EA/PE = 1/10), m.p. = 229–230 °C.  $^1\text{H}$  NMR (400 MHz,  $\text{CDCl}_3$ )  $\delta$  7.66 (d,  $J$  = 8.2 Hz, 2H), 7.32 (d,  $J$  = 8.2 Hz, 2H), 7.30 – 7.27 (m, 2H), 7.26 – 7.23 (m, 1H), 7.23 – 7.16 (m, 2H), 6.51 (d,  $J$  = 8.2 Hz, 1H), 5.66 (d,  $J$  = 8.2 Hz, 1H), 5.05 (dd,  $J$  = 16.1, 2.6 Hz, 1H), 5.01 – 4.93 (m, 1H), 4.89 (dd,  $J$  = 10.4, 2.6 Hz, 1H), 4.02 (d,  $J$  = 11.7 Hz, 1H), 2.99 (d,  $J$  = 11.7 Hz, 1H), 2.44 (s, 3H), 1.52 (d,  $J$  = 4.8 Hz, 1H), 1.41 (dd,  $J$  = 4.8, 0.9 Hz, 1H).  $^{13}\text{C}$  NMR (100 MHz,  $\text{CDCl}_3$ )  $\delta$  144.0, 139.9, 138.5, 135.0, 130.2, 130.0, 128.6, 127.5, 127.2, 122.0, 112.7, 112.4, 48.0,

42.4, 26.2, 25.8, 21.7. IR (neat): 2956, 2924, 2853, 1463, 1170, 1024  $\text{cm}^{-1}$ . HRMS (ESI): calcd. for  $\text{C}_{21}\text{H}_{22}\text{NO}_2\text{S}$  ( $[\text{M}+\text{H}]^+$ ): 352.1366, found 352.1367.

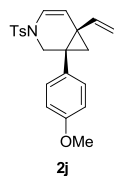

Run 1: Following general procedure A, 38.4 mg **1j** was used, 1 h. After flash column chromatography on silica gel (eluted with PE/EA 20:1), 32.4 mg **2j** was obtained in 84% yield.

Run 2: Following general procedure A, 37.9 mg **1j** was used, 1 h. After flash column chromatography on silica gel (eluted with PE/EA 20:1), 33.4 mg **2j** was obtained in 88% yield.

Average yield: 86%.

Light yellow solid, TLC  $R_f$  = 0.28 (EA/PE = 1/10), m.p. = 197-198 °C.  $^1\text{H}$  NMR (400 MHz,  $\text{CDCl}_3$ )  $\delta$  7.65 (d,  $J$  = 8.2 Hz, 2H), 7.32 (d,  $J$  = 8.2 Hz, 2H), 7.15 – 7.08 (m, 2H), 6.87 – 6.74 (m, 2H), 6.49 (d,  $J$  = 8.2 Hz, 1H), 5.64 (d,  $J$  = 8.2 Hz, 1H), 5.04 (dd,  $J$  = 16.7, 2.3 Hz, 1H), 5.00 – 4.92 (m, 1H), 4.90 (dd,  $J$  = 10.1, 2.3 Hz, 1H), 3.99 (dd,  $J$  = 11.7, 0.7 Hz, 1H), 3.78 (s, 3H), 2.93 (d,  $J$  = 11.7 Hz, 1H), 2.43 (s, 3H), 1.50 (d,  $J$  = 4.8 Hz, 1H), 1.36 (dd,  $J$  = 4.8, 1.0 Hz, 1H).  $^{13}\text{C}$  NMR (100 MHz,  $\text{CDCl}_3$ )  $\delta$  158.9, 144.0, 140.1, 134.9, 131.2, 130.5, 130.0, 127.2, 121.9, 114.0, 112.5, 112.4, 55.4, 48.1, 41.8, 26.3, 25.8, 21.7. IR (neat): 2956, 2925, 2852, 1463, 1171, 1021  $\text{cm}^{-1}$ . HRMS (ESI): calcd. for  $\text{C}_{22}\text{H}_{24}\text{NO}_3\text{S}$  ( $[\text{M}+\text{H}]^+$ ): 382.1471, found 382.1475.

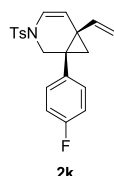

Run 1: Following general procedure A, 36.4 mg **1k** was used, 1 h. After flash column chromatography on silica gel (eluted with PE/EA 50:1), 30.4 mg **2k** was obtained in 84% yield.

Run 2: Following general procedure A, 36.9 mg **1k** was used, 1 h. After flash column chromatography on silica gel (eluted with PE/EA 50:1), 30.7 mg **2k** was obtained in 83% yield.

Average yield: 84%.

Light yellow solid, TLC  $R_f$  = 0.37 (EA/PE = 1/10), m.p. = 209-210 °C.  $^1\text{H}$  NMR (400 MHz,  $\text{CDCl}_3$ )  $\delta$  7.65 (d,  $J$  = 8.1 Hz, 2H), 7.32 (d,  $J$  = 8.1 Hz, 2H), 7.20 – 7.11 (m, 2H), 7.04 – 6.91 (m, 2H), 6.50 (d,  $J$  = 8.2 Hz, 1H), 5.63 (d,  $J$  = 8.2 Hz, 1H), 5.13 – 4.98 (m, 1H), 4.98 – 4.84 (m, 2H), 3.99 (d,  $J$  = 11.7 Hz, 1H), 2.93 (d,  $J$  = 11.7 Hz, 1H), 2.44 (s, 3H), 1.51 (d,  $J$  = 4.8 Hz, 1H), 1.37 (d,  $J$  = 4.8 Hz, 1H).  $^{13}\text{C}$  NMR (100 MHz,  $\text{CDCl}_3$ )  $\delta$  162.1 (d,  $J$  = 246.5 Hz), 144.1, 139.7, 135.0, 134.3 (d,  $J$  = 3.2 Hz), 131.8 (d,  $J$  = 8.1 Hz), 130.0, 127.2, 122.1, 115.6 (d,  $J$  = 21.4 Hz), 113.1, 112.3, 48.1, 41.6, 26.3, 25.8, 21.7. IR (neat): 2925, 2854, 1731, 1286, 1170  $\text{cm}^{-1}$ . HRMS (ESI): calcd. for  $\text{C}_{21}\text{H}_{21}\text{FNO}_2\text{S}$  ( $[\text{M}+\text{H}]^+$ ): 370.1272, found 370.1271.

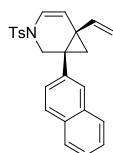

**2l**

Run 1: Following general procedure A, 40.8 mg **1l** was used, 1 h. After flash column chromatography on silica gel (eluted with PE/EA 50:1), 34.4 mg **2l** was obtained in 84% yield.

Run 2: Following general procedure A, 40.3 mg **1l** was used, 1 h. After flash column chromatography on silica gel (eluted with PE/EA 50:1), 34.2 mg **2l** was obtained in 85% yield.

Average yield: 84%.

White solid, TLC  $R_f$  = 0.33 (EA/PE = 1/10), m.p. = 223-225 °C.  $^1\text{H}$  NMR (400 MHz,  $\text{CDCl}_3$ )  $\delta$  7.88 – 7.73 (m, 3H), 7.70 (s, 1H), 7.66 (d,  $J$  = 8.2 Hz, 2H), 7.51 – 7.43 (m, 2H), 7.32 (d,  $J$  = 8.2 Hz, 2H), 7.29 (dd,  $J$  = 8.5, 1.7 Hz, 1H), 6.55 (d,  $J$  = 8.3 Hz, 1H), 5.69 (d,  $J$  = 8.3 Hz, 1H), 5.09 (dd,  $J$  = 17.0, 1.5 Hz, 1H), 4.98 (dd,  $J$  = 17.0, 10.4 Hz, 1H), 4.88 (dd,  $J$  = 10.4, 1.5 Hz, 1H), 4.07 (dd,  $J$  = 11.7, 0.6 Hz, 1H), 3.09 (d,  $J$  = 11.7 Hz, 1H), 2.44 (s, 3H), 1.62 (d,  $J$  = 4.8 Hz, 1H), 1.57 – 1.53 (m, 1H).  $^{13}\text{C}$  NMR (100 MHz,  $\text{CDCl}_3$ )  $\delta$  144.0, 139.8, 136.1, 134.9, 133.5, 132.7, 130.0, 129.1, 128.3, 128.0, 127.81, 127.77, 127.2, 126.4, 126.3, 122.1, 112.8, 112.2, 48.0, 42.4, 26.3, 25.9, 21.7. IR (neat): 2956, 2923, 2853, 1469, 1170  $\text{cm}^{-1}$ . HRMS (ESI): calcd. for  $\text{C}_{25}\text{H}_{24}\text{NO}_2\text{S}$  ( $[\text{M}+\text{H}]^+$ ): 402.1522, found 402.1522.

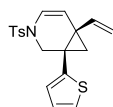

**2m**

Run 1: Following general procedure A, 35.7 mg **1m** was used, 1 h. After flash column chromatography on silica gel (eluted with PE/EA 50:1), 29.9 mg **2m** was obtained in 84% yield.

Run 2: Following general procedure A, 35.9 mg **1m** was used, 1 h. After flash column chromatography on silica gel (eluted with PE/EA 50:1), 31.0 mg **2m** was obtained in 86% yield.

Average yield: 85%.

Light yellow solid, TLC  $R_f$  = 0.34 (EA/PE = 1/10), m.p. = 276-277 °C.  $^1\text{H}$  NMR (400 MHz,  $\text{CDCl}_3$ )  $\delta$  7.67 (d,  $J$  = 8.2 Hz, 2H), 7.33 (d,  $J$  = 8.2 Hz, 2H), 7.16 (dd,  $J$  = 5.1, 1.1 Hz, 1H), 6.92 (dd,  $J$  = 5.1, 3.5 Hz, 1H), 6.84 (dd,  $J$  = 3.5, 1.1 Hz, 1H), 6.49 (d,  $J$  = 8.2 Hz, 1H), 5.59 (d,  $J$  = 8.2 Hz, 1H), 5.16 (dd,  $J$  = 17.3, 10.2 Hz, 1H), 5.07 (dd,  $J$  = 17.3, 1.5 Hz, 1H), 4.95 (dd,  $J$  = 10.2, 1.5 Hz, 1H), 4.11 (d,  $J$  = 11.6 Hz, 1H), 3.09 (d,  $J$  = 11.6 Hz, 1H), 2.44 (s, 3H), 1.56 (d,  $J$  = 5.1 Hz, 1H), 1.54 (d,  $J$  = 5.1 Hz, 1H).  $^{13}\text{C}$  NMR (100 MHz,  $\text{CDCl}_3$ )  $\delta$  144.1, 142.0, 138.6, 134.9, 130.1, 127.2, 127.0, 126.8, 124.9, 122.1, 113.9, 112.1, 47.5, 37.7, 27.7, 27.0, 21.7. IR (neat): 2925, 1345, 1164, 1089  $\text{cm}^{-1}$ . HRMS (ESI): calcd. for  $\text{C}_{19}\text{H}_{20}\text{NO}_2\text{S}_2$  ( $[\text{M}+\text{H}]^+$ ): 358.0930, found 358.0938.

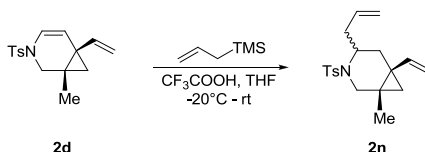

Following the reported procedure<sup>15</sup>: A solution of **2d** (171.7 mg, 0.59 mmol) in DCM (12 mL) was cooled to -20 °C, and allyltrimethylsilane (560  $\mu\text{L}$ , 3.5 mmol) and trifluoroacetic acid (180  $\mu\text{L}$ , 2.4

mmol) were added to the solution. The reaction mixture was stirred at the same temperature for 2 h. The mixture was allowed to warm to room temperature and stirred for 2 h. Saturated NaHCO<sub>3</sub> solution (10 mL) was added, and the mixture was extracted with DCM (3×10 mL), and organic layer was washed with brine (10 mL), dried over Na<sub>2</sub>SO<sub>4</sub>, filtered, and concentrated. The reaction mixture was purified by flash column chromatography on silica gel (eluted with PE/EA 50:1) to afford **2n** (159.9 mg, dr > 20/1, 81%).

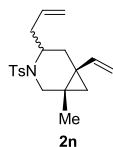

Colorless oil, TLC  $R_f$  = 0.55 (EA/PE = 1/5). <sup>1</sup>H NMR (400 MHz, CDCl<sub>3</sub>)  $\delta$  7.67 (d,  $J$  = 8.2 Hz, 2H), 7.28 (d,  $J$  = 8.2 Hz, 2H), 5.66 (dd,  $J$  = 17.2, 10.6 Hz, 1H), 5.61 – 5.50 (m, 1H), 5.03 (dd,  $J$  = 10.6, 1.1 Hz, 1H), 5.02 – 4.98 (m, 1H), 4.97 – 4.95 (m, 1H), 4.93 (dd,  $J$  = 17.2, 1.1 Hz, 1H), 3.93 – 3.83 (m, 1H), 3.78 (d,  $J$  = 13.0 Hz, 1H), 2.88 (d,  $J$  = 13.0 Hz, 1H), 2.41 (s, 3H), 2.16 – 2.02 (m, 1H), 2.00 – 1.88 (m, 2H), 1.79 (dd,  $J$  = 14.5, 6.2 Hz, 1H), 1.02 (s, 3H), 0.64 (d,  $J$  = 4.9 Hz, 1H), 0.59 (d,  $J$  = 4.9 Hz, 1H). <sup>13</sup>C NMR (100 MHz, CDCl<sub>3</sub>)  $\delta$  143.2, 142.1, 138.0, 134.9, 129.8, 127.1, 117.9, 113.6, 50.8, 44.7, 35.8, 30.8, 23.6, 22.4, 21.7, 21.5, 18.7. IR (neat): 2923, 2851, 1342, 1286, 1163, 1091, 1040 cm<sup>-1</sup>. HRMS (ESI): calcd. for C<sub>16</sub>H<sub>26</sub>NO<sub>2</sub>S ([M+H]<sup>+</sup>): 332.1679, found 332.1677.

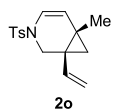

Run 1: Following general procedure B, 27.1 mg **1o** was used, 1 h. After flash column chromatography on silica gel (eluted with PE/EA 50:1), 19.9 mg **2o** was obtained in 73% yield.

Run 2: Following general procedure B, 27.8 mg **1o** was used, 1 h. After flash column chromatography on silica gel (eluted with PE/EA 50:1), 20.3 mg **2o** was obtained in 73% yield.

Average yield: 73%.

Colorless oil, TLC  $R_f$  = 0.48 (EA/PE = 1/10). <sup>1</sup>H NMR (400 MHz, CD<sub>2</sub>Cl<sub>2</sub>)  $\delta$  7.64 (d,  $J$  = 8.1 Hz, 2H), 7.35 (d,  $J$  = 8.1 Hz, 2H), 6.32 – 6.27 (m, 1H), 5.72 (dd,  $J$  = 17.4, 10.8 Hz, 1H), 5.23 (d,  $J$  = 8.0 Hz, 1H), 5.13 (dd,  $J$  = 10.8, 1.1 Hz, 1H), 5.05 (dd,  $J$  = 17.4, 1.1 Hz, 1H), 3.84 (d,  $J$  = 11.3 Hz, 1H), 2.91 (d,  $J$  = 11.3 Hz, 1H), 2.42 (s, 3H), 1.08 (s, 3H), 0.90 (d,  $J$  = 4.6 Hz, 1H), 0.78 (d,  $J$  = 4.6 Hz, 1H). <sup>13</sup>C NMR (100 MHz, CD<sub>2</sub>Cl<sub>2</sub>)  $\delta$  144.4, 137.3, 135.2, 130.2, 127.4, 121.1, 118.0, 115.6, 44.5, 36.9, 24.9, 21.7, 20.5, 19.2. IR (neat): 2929, 2854, 1353, 1168, 1127, 1097 cm<sup>-1</sup>. HRMS (ESI): calcd. for C<sub>16</sub>H<sub>20</sub>NO<sub>2</sub>S ([M+H]<sup>+</sup>): 290.1209, found 290.1208.

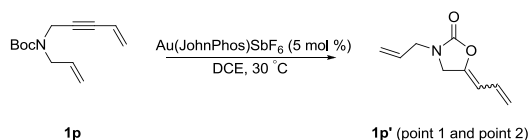

Run 1: Following general procedure A, 21.2 mg **1p** was used, 1 h. After flash column chromatography on silica gel (eluted with PE/EA 10:1), 5.2 mg **point 1** was obtained in 33% yield and 7.3 mg **point 2** was obtained in 46% yield.

Run 2: Following general procedure A, 22.1 mg **1p** was used, 1 h. After flash column chromatography on silica gel (eluted with PE/EA 10:1), 4.8 mg **point 1** was obtained in 29% yield and 8.2 mg **point 2** was obtained in 50% yield.

Average yield: 31% **point 1**, 48% **point 2**.

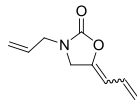

**1p'** (point 1)

Colorless oil, TLC  $R_f$  = 0.17 (EA/PE = 1/10).  $^1\text{H}$  NMR (400 MHz,  $\text{CDCl}_3$ )  $\delta$  6.73 – 6.54 (m, 1H), 5.82 – 5.70 (m, 1H), 5.33 – 5.21 (m, 3H), 5.13 (d,  $J$  = 17.1 Hz, 1H), 5.03 (d,  $J$  = 10.4 Hz, 1H), 4.15 (d,  $J$  = 0.7 Hz, 2H), 3.94 – 3.90 (m, 2H).  $^{13}\text{C}$  NMR (100 MHz,  $\text{CDCl}_3$ )  $\delta$  155.2, 142.5, 131.3, 128.9, 119.9, 115.9, 104.3, 47.6, 46.6. IR (neat): 2919, 2849, 1789, 1689, 1646, 1478, 1438, 1413, 1305, 1258, 1056, 994, 972, 900  $\text{cm}^{-1}$ . HRMS (ESI): calcd. for  $\text{C}_9\text{H}_{12}\text{NO}_2$  ( $[\text{M}+\text{H}]^+$ ): 166.0863, found 166.0861.

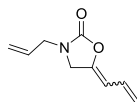

**1p'** (point 2)

Colorless oil, TLC  $R_f$  = 0.10 (EA/PE = 1/10).  $^1\text{H}$  NMR (400 MHz,  $\text{CDCl}_3$ )  $\delta$  6.04 (dd,  $J$  = 17.2, 11.0 Hz, 1H), 5.87 – 5.76 (m, 1H), 5.73 (d,  $J$  = 17.2 Hz, 1H), 5.30 – 5.20 (m, 3H), 5.05 (t,  $J$  = 3.3 Hz, 1H), 3.99 (d,  $J$  = 6.0 Hz, 2H), 3.86 (d,  $J$  = 3.3 Hz, 2H).  $^{13}\text{C}$  NMR (100 MHz,  $\text{CDCl}_3$ )  $\delta$  150.2, 147.9, 131.4, 128.0, 118.8, 116.3, 98.6, 51.3, 44.9. IR (neat): 2918, 1720, 1610, 1485, 1443, 1357, 1241, 1186, 1094, 991, 923  $\text{cm}^{-1}$ . HRMS (ESI): calcd. for  $\text{C}_9\text{H}_{12}\text{NO}_2$  ( $[\text{M}+\text{H}]^+$ ): 166.0863, found 166.0860.

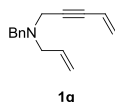

**1q**

When **1q** was subjected to the Au(I)-catalyzed cycloisomerization, starting material was recovered (76%).

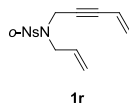

**1r**

When **1r** was subjected to the Au(I)-catalyzed cycloisomerization, starting material was recovered (67%) and some unidentified products were also found (judged by TLC).

## V. General Procedure and Experimental Details of Rh(I)-Catalyzed [5+1] Cycloaddition

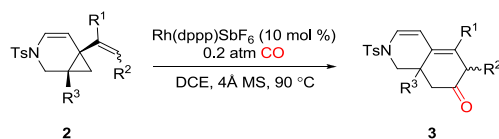

### General procedure C:

**Preparation of solution of cationic Rh(I) catalyst:** Anhydrous DCE (2.0 mL) was added to a mixture of  $[\text{Rh}(\text{CO})_2\text{Cl}]_2$  (2.0 mg, 5.1  $\mu\text{mol}$ ),  $\text{AgSbF}_6$  (4.1 mg, 11.9  $\mu\text{mol}$ ), and dppp (4.1 mg, 9.9  $\mu\text{mol}$ ) under nitrogen. The mixture was stirred at room temperature for 30 min. The resulting suspension was left to stand until the formed  $\text{AgCl}$  precipitated. The supernatant was used in Rh(I)-catalyzed [5+1] cycloaddition reactions as the catalyst precursor.

**General procedure of Rh(I)-catalyzed [5+1] cycloaddition:** Under nitrogen, the above  $\text{Rh(I)}^+$  solution (2.0 mL) was added to a flame-dried glassware containing **2** (0.1 mmol) and the newly activated 4 Å molecular sieves (0.08 g) at rt. Then the reaction mixture was bubbled with a mixed gas of  $\text{CO}/\text{N}_2$  (v/v = 1/4) for 10 min. The glassware was immersed into an oil bath at 90 °C and reacted under the atmosphere pressure of the mixed gas of  $\text{CO}/\text{N}_2$  (v/v = 1/4). The reaction was monitored by TLC. Upon completion, the reaction mixture was purified by flash column chromatography on silica gel to afford **3**.

**(Attention:** The present reaction is sensitive to solvent and very highly anhydrous DCE must be used. Molecular sieves also should be activated before the reaction. If the reaction system were not dry, VCP rearrangement products could be the major products.)

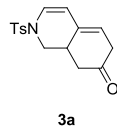

Run 1: Following general procedure C, 27.4 mg **2a** was used, 20 h. After flash column chromatography on silica gel (eluted with PE/EA 3:1), 19.8 mg **3a** was obtained in 66% yield.

Run 2: Following general procedure C, 27.3 mg **2a** was used, 20 h. After flash column chromatography on silica gel (eluted with PE/EA 3:1), 19.4 mg **3a** was obtained in 64% yield.

Average yield: 65%.

Colorless oil, TLC  $R_f$  = 0.37 (EA/PE = 1/3).  $^1\text{H}$  NMR (500 MHz,  $\text{CDCl}_3$ )  $\delta$  7.67 (d,  $J$  = 8.2 Hz, 2H), 7.32 (d,  $J$  = 8.2 Hz, 2H), 6.73 (d,  $J$  = 8.0 Hz, 1H), 5.53 (t,  $J$  = 6.4 Hz, 1H), 5.52 – 5.47 (m, 1H), 3.98 – 3.88 (m, 1H), 3.03 (d,  $J$  = 23.2 Hz, 1H), 2.90 (d,  $J$  = 23.2 Hz, 1H), 2.71 – 2.63 (m, 2H), 2.48 (dd,  $J$  = 14.3, 3.8 Hz, 1H), 2.43 (s, 3H), 2.17 – 2.07 (m, 1H).  $^{13}\text{C}$  NMR (125 MHz,  $\text{CDCl}_3$ )  $\delta$  207.2, 144.4, 134.9, 131.6, 130.2, 127.2, 125.7, 118.6, 109.6, 48.7, 42.3, 40.2, 33.8, 21.7. IR (neat): 2923, 1720, 1340, 1265, 1160, 1088  $\text{cm}^{-1}$ . HRMS (ESI): calcd. for  $\text{C}_{16}\text{H}_{18}\text{NO}_3\text{S}$  ( $[\text{M}+\text{H}]^+$ ): 304.1002, found 304.1005.

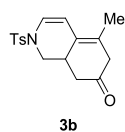

Run 1: Following general procedure C, 26.9 mg **2b** was used, 12 h. After flash column

chromatography on silica gel (eluted with PE/EA 20:1 then 3:1), 7.4 mg **4b** was obtained in 28% yield and 16.9 mg **3b** was obtained in 57% yield.

Run 2: Following general procedure C, 28.4 mg **2b** was used, 12 h. After flash column chromatography on silica gel (eluted with PE/EA 20:1 then 3:1), 8.5 mg **4b** was obtained in 30% yield and 17.0 mg **3b** was obtained in 55% yield.

Average yield: 56% **3b**, 29% **4b**.

Colorless oil, TLC  $R_f$  = 0.34 (EA/PE = 1/3).  $^1\text{H}$  NMR (400 MHz,  $\text{CDCl}_3$ )  $\delta$  7.67 (d,  $J$  = 8.2 Hz, 2H), 7.32 (d,  $J$  = 8.2 Hz, 2H), 6.74 (d,  $J$  = 8.3 Hz, 1H), 5.74 (d,  $J$  = 8.3 Hz, 1H), 3.94 – 3.83 (m, 1H), 2.96 (d,  $J$  = 22.4 Hz, 1H), 2.80 (d,  $J$  = 22.4 Hz, 1H), 2.68 – 2.55 (m, 2H), 2.51 – 2.44 (m, 1H), 2.42 (s, 3H), 2.13 – 2.01 (m, 1H), 1.72 (s, 3H).  $^{13}\text{C}$  NMR (100 MHz,  $\text{CDCl}_3$ )  $\delta$  207.4, 144.3, 134.7, 130.1, 127.1, 125.2, 125.1, 124.4, 106.2, 49.0, 46.1, 42.7, 34.3, 21.7, 17.9. IR (neat): 2921, 1718, 1663, 1340, 1163, 1090  $\text{cm}^{-1}$ . HRMS (ESI): calcd. for  $\text{C}_{17}\text{H}_{20}\text{NO}_3\text{S}$  ( $[\text{M}+\text{H}]^+$ ): 318.1158, found 318.1162.

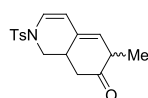

**3c**

Run 1: Following general procedure C, 27.9 mg **2c** was used, 24 h. After flash column chromatography on silica gel (eluted with PE/EA 3:1), 12.1 mg **3c** was obtained in 40% yield, dr = 1.4/1.

Run 2: Following general procedure C, 29.5 mg **2c** was used, 24 h. After flash column chromatography on silica gel (eluted with PE/EA 3:1), 14.4 mg **3c** was obtained in 44% yield, dr = 1.4/1.

Average yield: 42%, dr = 1.4/1.

Colorless oil, TLC  $R_f$  = 0.67 (EA/PE = 1/3).  $^1\text{H}$  NMR (400 MHz,  $\text{CDCl}_3$ )  $\delta$  7.68 – 7.64 (m, 2.8H + 2H), 7.32 (d,  $J$  = 8.2 Hz, 2.8H + 2H), 6.76 – 6.70 (m, 1.4H + 1H), 5.55 – 5.47 (m, 1.4H + 1H), 5.43 – 5.37 (m, 1.4H + 1H), 3.95 – 3.86 (m, 1.4H + 1H), 3.08 – 3.01 (m, 1.4H), 2.92 – 2.80 (m, 1H), 2.73 – 2.61 (m, 2.8H + 2H), 2.47 – 2.45 (m, 1H), 2.43 (s, 4.2H + 3H), 2.40 – 2.36 (m, 1.4H), 2.27 – 2.20 (m, 1.4H), 2.16 – 2.09 (m, 1H), 1.18 (d,  $J$  = 7.4 Hz, 3H), 1.11 (d,  $J$  = 7.2 Hz, 4.2H).  $^{13}\text{C}$  NMR (100 MHz,  $\text{CDCl}_3$ )  $\delta$  211.1, 208.6, 144.39, 144.38, 134.82, 134.78, 130.8, 130.5, 130.2, 127.2, 127.1, 125.9, 125.8, 125.2, 109.6, 109.3, 48.9, 48.6, 44.2, 43.6, 42.4, 39.7, 34.9, 33.9, 21.7, 19.3, 15.3. IR (neat): 1717, 1353, 1235, 1186, 1168, 1101, 1030, 1008  $\text{cm}^{-1}$ . HRMS (ESI): calcd. for  $\text{C}_{17}\text{H}_{19}\text{NaNO}_3\text{S}$  ( $[\text{M}+\text{Na}]^+$ ): 340.0978, found 340.0985.

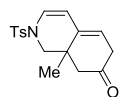

**3d**

Run 1: Following general procedure C, 29.2 mg **2d** was used, 12 h. After flash column chromatography on silica gel (eluted with PE/EA 50:1 then 5:1), 4.8 mg **4d** was obtained in 16% yield and 24.1 mg **3d** was obtained in 75% yield.

Run 2: Following general procedure C, 28.8 mg **2d** was used, 12 h. After flash column chromatography on silica gel (eluted with PE/EA 50:1 then 5:1), 2.4 mg **4d** was obtained in 8% yield and 24.0 mg **3d** was obtained in 76% yield.

Average yield: 76% **3d**, 12 % **4d**.

Yellow solid, TLC  $R_f$  = 0.39 (EA/PE = 1/3), m.p. = 141-143 °C.  $^1\text{H}$  NMR (400 MHz,  $\text{CDCl}_3$ )  $\delta$  7.69 (d,  $J$  = 8.2 Hz, 2H), 7.33 (d,  $J$  = 8.2 Hz, 2H), 6.73 (d,  $J$  = 8.1 Hz, 1H), 5.45 (d,  $J$  = 8.1 Hz, 1H), 5.41 (t,  $J$  = 3.9 Hz, 1H), 3.55 (d,  $J$  = 11.2 Hz, 1H), 3.02 (dd,  $J$  = 23.5, 3.9 Hz, 1H), 2.93 (dd,  $J$  = 23.5, 3.9 Hz, 1H), 2.68 (d,  $J$  = 11.2 Hz, 1H), 2.43 (s, 3H), 2.27 (s, 2H), 0.95 (s, 3H).  $^{13}\text{C}$  NMR (125 MHz,  $\text{CDCl}_3$ )  $\delta$  207.4, 144.4, 136.3, 135.0, 130.1, 127.2, 124.8, 117.1, 107.8, 54.2, 49.8, 40.1, 37.1, 23.2, 21.7. IR (neat): 1717, 1350, 1163, 1097, 1046, 1007  $\text{cm}^{-1}$ . HRMS (ESI): calcd. for  $\text{C}_{17}\text{H}_{20}\text{NO}_3\text{S}$  ( $[\text{M}+\text{H}]^+$ ): 318.1158, found 318.1167.

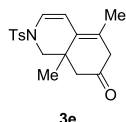

Run 1: Following general procedure C, 29.8 mg **2e** was used, 1 h. After flash column chromatography on silica gel (eluted with PE/EA 50:1 then 5:1), 19.2 mg **4e** was obtained in 64% yield and 11.2 mg **3e** was obtained in 34% yield.

Run 2: Following general procedure C, 30.7 mg **2e** was used, 1 h. After flash column chromatography on silica gel (eluted with PE/EA 50:1 then 5:1), 20.4 mg **4e** was obtained in 66% yield and 11.0 mg **3e** was obtained in 33% yield.

Average yield: 34% **3e**, 65% **4e**.

Colorless oil, TLC  $R_f$  = 0.41 (EA/PE = 1/3).  $^1\text{H}$  NMR (400 MHz,  $\text{CDCl}_3$ )  $\delta$  7.69 (d,  $J$  = 8.2 Hz, 2H), 7.32 (d,  $J$  = 8.2 Hz, 2H), 6.74 (d,  $J$  = 8.3 Hz, 1H), 5.65 (d,  $J$  = 8.3 Hz, 1H), 3.52 (dd,  $J$  = 11.1, 1.1 Hz, 1H), 2.94 (d,  $J$  = 22.9 Hz, 1H), 2.85 (d,  $J$  = 22.9 Hz, 1H), 2.65 (d,  $J$  = 11.1 Hz, 1H), 2.42 (s, 3H), 2.24 (s, 2H), 1.70 (s, 3H), 0.90 (s, 3H).  $^{13}\text{C}$  NMR (100 MHz,  $\text{CDCl}_3$ )  $\delta$  207.6, 144.3, 134.9, 130.1, 129.0, 127.2, 124.3, 123.4, 104.4, 54.5, 50.2, 45.9, 37.5, 23.2, 21.7, 17.9. IR (neat): 2920, 2851, 1659, 1341, 1162, 1037  $\text{cm}^{-1}$ . HRMS (ESI): calcd. for  $\text{C}_{18}\text{H}_{22}\text{NO}_3\text{S}$  ( $[\text{M}+\text{H}]^+$ ): 332.1315, found 332.1324.

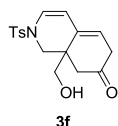

Run 1: Following general procedure C, 28.4 mg **2f** was used, 3 h. After flash column chromatography on silica gel (eluted with PE/EA 5:1 then 2:1), 11.3 mg **4f** was obtained in 40% yield and 12.0 mg **3f** was obtained in 39% yield.

Run 2: Following general procedure C, 32.9 mg **2f** was used, 3 h. After flash column chromatography on silica gel (eluted with PE/EA 5:1 then 2:1), 10.8 mg **4f** was obtained in 33% yield and 14.8 mg **3f** was obtained in 41% yield.

Average yield: 40% **3f**, 36% **4f**.

Colorless oil, TLC  $R_f$  = 0.15 (EA/PE = 1/2).  $^1\text{H}$  NMR (400 MHz,  $\text{CDCl}_3$ )  $\delta$  7.69 (d,  $J$  = 8.1 Hz, 2H), 7.33 (d,  $J$  = 8.1 Hz, 2H), 6.70 (d,  $J$  = 8.0 Hz, 1H), 5.67 – 5.55 (m, 1H), 5.48 (d,  $J$  = 8.0 Hz, 1H), 3.85 (d,  $J$  = 11.6 Hz, 1H), 3.44 (d,  $J$  = 11.3 Hz, 1H), 3.32 (d,  $J$  = 11.3 Hz, 1H), 2.96 (s, 2H), 2.67 – 2.52 (m, 2H), 2.43 (s, 3H), 2.07 (d,  $J$  = 14.7 Hz, 2H).  $^{13}\text{C}$  NMR (100 MHz,  $\text{CDCl}_3$ )  $\delta$  207.0, 144.6, 134.6, 131.9, 130.2, 127.2, 124.6, 120.5, 108.1, 64.5, 49.2, 45.1, 42.7, 40.1, 21.7. IR (neat): 2920,

2851, 1719, 1655, 1341, 1162, 1092  $\text{cm}^{-1}$ . HRMS (ESI): calcd. for  $\text{C}_{17}\text{H}_{20}\text{NO}_4\text{S}$  ( $[\text{M}+\text{H}]^+$ ): 334.1108, found 334.1117.

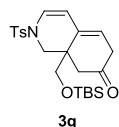

Run 1: Following general procedure C, 41.5 mg **2g** was used, 16 h. After flash column chromatography on silica gel (eluted with PE/EA 5:1), 37.1 mg **3g** was obtained in 84% yield.

Run 2: Following general procedure C, 41.6 mg **2g** was used, 16 h. After flash column chromatography on silica gel (eluted with PE/EA 5:1), 37.5 mg **3g** was obtained in 84% yield.

Average yield: 84%.

Yellow solid, TLC  $R_f$  = 0.56 (EA/PE = 1/3), m.p. = 115-116  $^{\circ}\text{C}$ .  $^1\text{H}$  NMR (400 MHz,  $\text{CDCl}_3$ )  $\delta$  7.68 (d,  $J$  = 8.2 Hz, 2H), 7.33 (d,  $J$  = 8.2 Hz, 2H), 6.67 (d,  $J$  = 8.1 Hz, 1H), 5.59 (t,  $J$  = 3.8 Hz, 1H), 5.47 (d,  $J$  = 8.1 Hz, 1H), 3.80 (d,  $J$  = 11.4 Hz, 1H), 3.40 – 3.24 (m, 2H), 2.99 – 2.85 (m, 2H), 2.60 (d,  $J$  = 11.4 Hz, 1H), 2.52 (d,  $J$  = 14.9 Hz, 1H), 2.42 (s, 3H), 2.03 (d,  $J$  = 14.9 Hz, 1H), 0.82 (s, 9H), -0.05 (s, 3H), -0.06 (s, 3H).  $^{13}\text{C}$  NMR (100 MHz,  $\text{CDCl}_3$ )  $\delta$  206.3, 144.4, 134.7, 131.7, 130.1, 127.3, 124.3, 120.7, 108.2, 66.5, 49.8, 46.0, 42.6, 40.1, 26.0, 21.7, 18.5, -5.65, -5.70. IR (neat): 1718, 1344, 1253, 1167, 1091, 1043, 1005  $\text{cm}^{-1}$ . HRMS (ESI): calcd. for  $\text{C}_{23}\text{H}_{34}\text{NO}_4\text{SSi}$  ( $[\text{M}+\text{H}]^+$ ): 448.1972, found 448.1984.

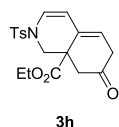

Run 1: Following general procedure C, 32.5 mg **2h** was used, 1 h. After flash column chromatography on silica gel (eluted with PE/EA 10:1 then 3:1), 21.7 mg **4h** was obtained in 67% yield and 8.3 mg **3h** was obtained in 24% yield.

Run 2: Following general procedure C, 34.2 mg **2h** was used, 1 h. After flash column chromatography on silica gel (eluted with PE/EA 10:1 then 3:1), 19.2 mg **4h** was obtained in 56% yield and 10.0 mg **3h** was obtained in 27% yield.

Average yield: 26% **3h**, 62% **4h**.

Colorless oil, TLC  $R_f$  = 0.22 (EA/PE = 1/3).  $^1\text{H}$  NMR (400 MHz,  $\text{CDCl}_3$ )  $\delta$  7.69 (d,  $J$  = 8.2 Hz, 2H), 7.33 (d,  $J$  = 8.2 Hz, 2H), 6.74 (d,  $J$  = 8.2 Hz, 1H), 5.73 (t,  $J$  = 4.0 Hz, 1H), 5.53 (d,  $J$  = 8.2 Hz, 1H), 4.32 (d,  $J$  = 11.6 Hz, 1H), 4.09 – 3.94 (m, 2H), 3.08 (dd,  $J$  = 23.5, 4.0 Hz, 1H), 3.00 (dd,  $J$  = 23.5, 4.0 Hz, 1H), 2.70 (d,  $J$  = 11.6 Hz, 1H), 2.69 (d,  $J$  = 15.0 Hz, 1H), 2.43 (s, 3H), 2.25 (d,  $J$  = 15.0 Hz, 1H), 1.16 (t,  $J$  = 7.1 Hz, 3H).  $^{13}\text{C}$  NMR (100 MHz,  $\text{CDCl}_3$ )  $\delta$  204.9, 170.8, 144.4, 135.0, 130.2, 130.0, 127.3, 125.3, 121.4, 107.5, 62.2, 50.1, 47.5, 46.2, 39.7, 21.7, 14.0. IR (neat): 2924, 1727, 1346, 1252, 1164  $\text{cm}^{-1}$ . HRMS (ESI): calcd. for  $\text{C}_{19}\text{H}_{22}\text{NO}_5\text{S}$  ( $[\text{M}+\text{H}]^+$ ): 376.1213, found 376.1224.

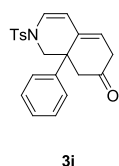

Run 1: Following general procedure C, 35.0 mg **2i** was used, 16 h. After flash column chromatography on silica gel (eluted with PE/EA 3:1), 30.2 mg **3i** was obtained in 80% yield.

Run 2: Following general procedure C, 35.1 mg **2i** was used, 16 h. After flash column chromatography on silica gel (eluted with PE/EA 3:1), 29.0 mg **3i** was obtained in 77% yield.

Average yield: 78%.

Light yellow solid, TLC  $R_f$  = 0.29 (EA/PE = 1/3), m.p. = 81-86 °C.  $^1\text{H}$  NMR (400 MHz,  $\text{CDCl}_3$ )  $\delta$  7.38 (d,  $J$  = 8.3 Hz, 2H), 7.17 – 7.10 (m, 5H), 7.10 – 7.04 (m, 2H), 6.71 (d,  $J$  = 8.1 Hz, 1H), 5.86 – 5.75 (m, 1H), 5.68 (d,  $J$  = 8.1 Hz, 1H), 4.22 (d,  $J$  = 11.8 Hz, 1H), 3.09 (d,  $J$  = 11.8 Hz, 1H), 2.99 (dd,  $J$  = 23.5, 4.8 Hz, 1H), 2.84 – 2.71 (m, 2H), 2.53 (d,  $J$  = 14.2 Hz, 1H), 2.38 (s, 3H).  $^{13}\text{C}$  NMR (100 MHz,  $\text{CDCl}_3$ )  $\delta$  206.4, 143.9, 139.1, 135.2, 134.6, 129.8 (CH), 128.9 (CH), 127.4 (CH), 126.9 (CH), 126.4 (CH), 126.0 (CH), 119.9 (CH), 108.5 (CH), 54.3 ( $\text{CH}_2$ ), 50.8 ( $\text{CH}_2$ ), 45.1, 40.1 ( $\text{CH}_2$ ), 21.6 ( $\text{CH}_3$ ). IR (neat): 1719, 1342, 1161, 1090  $\text{cm}^{-1}$ . HRMS (ESI): calcd. for  $\text{C}_{22}\text{H}_{21}\text{NNaO}_3\text{S}$  ( $[\text{M}+\text{Na}]^+$ ): 402.1134, found 402.1143.

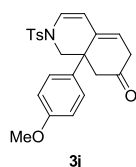

Run 1: Following general procedure C, 38.3 mg **2j** was used, 14 h. After flash column chromatography on silica gel (eluted with PE/EA 20:1 then 3:1), 4.4 mg **4j** was obtained in 11% yield and 32.1 mg **3j** was obtained in 78% yield.

Run 2: Following general procedure C, 37.8 mg **2j** was used, 14 h. After flash column chromatography on silica gel (eluted with PE/EA 20:1 then 3:1), 4.0 mg **4j** was obtained in 11% yield and 30.7 mg **3j** was obtained in 76% yield.

Average yield: 77% **3j**, 11% **4j**.

White solid, TLC  $R_f$  = 0.20 (EA/PE = 1/3), m.p. = 65-70 °C.  $^1\text{H}$  NMR (400 MHz,  $\text{CDCl}_3$ )  $\delta$  7.37 (d,  $J$  = 8.2 Hz, 2H), 7.12 (d,  $J$  = 8.2 Hz, 2H), 6.95 (d,  $J$  = 8.7 Hz, 2H), 6.74 (d,  $J$  = 8.0 Hz, 1H), 6.62 (d,  $J$  = 8.7 Hz, 2H), 5.81 – 5.75 (m, 1H), 5.68 (d,  $J$  = 8.0 Hz, 1H), 4.15 (d,  $J$  = 11.9 Hz, 1H), 3.74 (s, 3H), 3.10 (d,  $J$  = 11.9 Hz, 1H), 2.98 (dd,  $J$  = 23.5, 4.7 Hz, 1H), 2.84 – 2.68 (m, 2H), 2.52 (d,  $J$  = 14.0 Hz, 1H), 2.39 (s, 3H).  $^{13}\text{C}$  NMR (100 MHz,  $\text{CDCl}_3$ )  $\delta$  206.6, 158.8, 143.8, 135.5, 134.9, 130.9, 129.7, 127.5, 126.9, 125.9, 119.7, 114.2, 108.6, 55.2, 54.6, 50.8, 44.5, 40.1, 21.6. IR (neat): 1719, 1512, 1343, 1252, 1185, 1163  $\text{cm}^{-1}$ . HRMS (ESI): calcd. for  $\text{C}_{23}\text{H}_{23}\text{NNaO}_4\text{S}$  ( $[\text{M}+\text{Na}]^+$ ): 432.1240, found 432.1249.

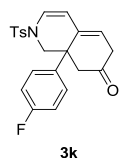

Run 1: Following general procedure C, 37.1 mg **2k** was used, 12 h. After flash column chromatography on silica gel (eluted with PE/EA 20:1 then 3:1), 9.9 mg **4k** was obtained in 27% yield and 28.0 mg **3k** was obtained in 70% yield.

Run 2: Following general procedure C, 36.5 mg **2k** was used, 12 h. After flash column chromatography on silica gel (eluted with PE/EA 20:1 then 3:1), 8.2 mg **4k** was obtained in 22% yield and 27.7 mg **3k** was obtained in 70% yield.

Average yield: 70% **3k**, 24% **4k**.

White solid, TLC  $R_f$  = 0.27 (EA/PE = 1/3), m.p. = 66-70 °C.  $^1\text{H}$  NMR (400 MHz,  $\text{CDCl}_3$ )  $\delta$  7.37 (d,  $J$  = 8.2 Hz, 2H), 7.14 (d,  $J$  = 8.2 Hz, 2H), 7.06 – 6.94 (m, 2H), 6.85 – 6.69 (m, 3H), 5.85 – 5.77 (m, 1H), 5.69 (d,  $J$  = 8.0 Hz, 1H), 4.13 (d,  $J$  = 12.1 Hz, 1H), 3.15 (d,  $J$  = 12.1 Hz, 1H), 3.00 (dd,  $J$  = 23.5, 4.7 Hz, 1H), 2.79 – 2.71 (m, 2H), 2.55 (d,  $J$  = 14.1 Hz, 1H), 2.40 (s, 3H).  $^{13}\text{C}$  NMR (100 MHz,  $\text{CDCl}_3$ )  $\delta$  206.0, 161.9 (d,  $J$  = 244.9 Hz), 143.9, 135.3, 134.7 (d,  $J$  = 3.2 Hz), 134.4, 129.7, 128.1 (d,  $J$  = 8.3 Hz), 126.7, 126.0, 120.0, 115.5 (d,  $J$  = 21.4 Hz), 108.2, 54.5, 50.5, 44.6, 40.0, 21.5. IR (neat): 1720, 1509, 1343, 1234, 1161, 1090  $\text{cm}^{-1}$ . HRMS (ESI): calcd. for  $\text{C}_{22}\text{H}_{20}\text{FNNaO}_3\text{S}$  ( $[\text{M}+\text{Na}]^+$ ): 420.1040, found 420.1056.

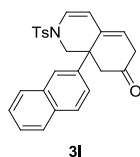

Run 1: Following general procedure C, 40.5 mg **2l** was used, 14 h. After flash column chromatography on silica gel (eluted with PE/EA 20:1 then 3:1), 9.6 mg **4l** was obtained in 24% yield and 30.2 mg **3l** was obtained in 70% yield.

Run 2: Following general procedure C, 40.8 mg **2l** was used, 14 h. After flash column chromatography on silica gel (eluted with PE/EA 20:1 then 3:1), 12.7 mg **4l** was obtained in 31% yield and 28.7 mg **3l** was obtained in 66% yield.

Average yield: 68% **3l**, 28% **4l**.

Light yellow solid, TLC  $R_f$  = 0.24 (EA/PE = 1/3), m.p. = 187-189 °C.  $^1\text{H}$  NMR (400 MHz,  $\text{CDCl}_3$ )  $\delta$  7.76 – 7.69 (m, 1H), 7.63 – 7.54 (m, 2H), 7.49 – 7.39 (m, 2H), 7.35 (d,  $J$  = 1.4 Hz, 1H), 7.19 (dd,  $J$  = 8.6, 2.0 Hz, 1H), 7.14 (d,  $J$  = 8.2 Hz, 2H), 6.81 (d,  $J$  = 8.0 Hz, 1H), 6.65 (d,  $J$  = 8.2 Hz, 2H), 5.97 – 5.86 (m, 1H), 5.80 (d,  $J$  = 8.0 Hz, 1H), 4.32 (d,  $J$  = 12.3 Hz, 1H), 3.31 (d,  $J$  = 12.3 Hz, 1H), 3.07 – 2.91 (m, 2H), 2.74 (dd,  $J$  = 23.6, 2.8 Hz, 1H), 2.62 (d,  $J$  = 14.3 Hz, 1H), 2.10 (s, 3H).  $^{13}\text{C}$  NMR (100 MHz,  $\text{CDCl}_3$ )  $\delta$  206.4, 143.5, 136.4, 135.5, 134.7, 133.2, 132.7, 129.3, 128.9, 128.2, 127.4, 126.4, 126.3, 126.2, 126.1, 126.0, 123.6, 120.2, 108.7, 54.8, 50.3, 45.2, 40.1, 21.5. IR (neat): 1720, 1345, 1163, 1107, 1090  $\text{cm}^{-1}$ . HRMS (ESI): calcd. for  $\text{C}_{26}\text{H}_{24}\text{NO}_3\text{S}$  ( $[\text{M}+\text{H}]^+$ ): 430.1471, found 430.1474.

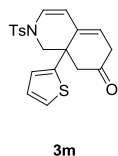

Run 1: Following general procedure C, 35.4 mg **2m** was used, 12 h. After flash column chromatography on silica gel (eluted with PE/EA 20:1 then 3:1), 10.0 mg **4m** was obtained in 28% yield and 22.5 mg **3m** was obtained in 59% yield.

Run 2: Following general procedure C, 35.2 mg **2m** was used, 12 h. After flash column chromatography on silica gel (eluted with PE/EA 20:1 then 3:1), 10.9 mg **4m** was obtained in 31% yield and 20.7 mg **3m** was obtained in 54% yield.

Average yield: 56% **3m**, 30% **4m**.

Colorless oil, TLC  $R_f$  = 0.30 (EA/PE = 1/3).  $^1\text{H}$  NMR (400 MHz,  $\text{CDCl}_3$ )  $\delta$  7.50 (d,  $J$  = 8.2 Hz, 2H), 7.21 (d,  $J$  = 8.2 Hz, 2H), 7.05 (dd,  $J$  = 5.1, 1.1 Hz, 1H), 6.80 – 6.70 (m, 2H), 6.69 (dd,  $J$  = 3.6, 1.1

Hz, 1H), 5.77 – 5.68 (m, 1H), 5.64 (d,  $J = 8.1$  Hz, 1H), 4.13 (d,  $J = 11.7$  Hz, 1H), 3.08 (d,  $J = 11.7$  Hz, 1H), 3.06 – 2.96 (m, 1H), 2.91 (dd,  $J = 23.7, 3.0$  Hz, 1H), 2.79 (d,  $J = 14.4$  Hz, 1H), 2.56 (d,  $J = 14.4$  Hz, 1H), 2.40 (s, 3H).  $^{13}\text{C}$  NMR (100 MHz,  $\text{CDCl}_3$ )  $\delta$  205.8, 144.5, 144.0, 135.2, 134.8, 129.9, 127.1, 127.0, 125.6, 125.09, 125.07, 119.6, 107.9, 54.9, 51.6, 43.0, 39.9, 21.7. IR (neat): 1721, 1344, 1263, 1161, 1091, 1018  $\text{cm}^{-1}$ . HRMS (ESI): calcd. for  $\text{C}_{20}\text{H}_{19}\text{NNaO}_3\text{S}_2$  ( $[\text{M}+\text{Na}]^+$ ): 408.0699, found 408.0710.

## VI. General Procedure and Experimental Details of Rh(I)-Catalyzed Rearrangement of VCPs

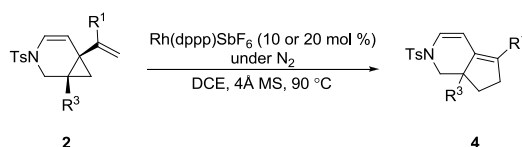

### General procedure D: (10 mol % catalyst)

**Preparation of solution of cationic Rh(I) catalyst:** Anhydrous DCE (2.0 mL) was added to a mixture of  $[\text{Rh}(\text{CO})_2\text{Cl}]_2$  (2.0 mg, 5.1  $\mu\text{mol}$ ),  $\text{AgSbF}_6$  (4.1 mg, 11.9  $\mu\text{mol}$ ), and dppp (5.0 mg, 12.1  $\mu\text{mol}$ ) under nitrogen. The mixture was stirred at room temperature for 30 min. The resulting suspension was left to stand until the formed  $\text{AgCl}$  precipitated. The supernatant was used in Rh(I)-catalyzed Rearrangement of VCPs as the catalyst precursor.

**General procedure of Rh(I)-catalyzed Rearrangement of VCPs:** Under nitrogen, the above  $\text{Rh(I)}^+$  solution (2.0 mL) was added to a flame-dried glassware containing **2** (0.1 mmol) and the newly activated 4 Å molecular sieves (0.08 g) at rt. Then the glassware was immersed into an oil bath at 90 °C. The reaction was monitored by TLC. Upon completion, the reaction mixture was purified by flash column chromatography on silica gel to afford **4**.

### General procedure E: (20 mol % catalyst)

**Preparation of solution of cationic Rh(I) catalyst:** Anhydrous DCE (2.0 mL) was added to a mixture of  $[\text{Rh}(\text{CO})_2\text{Cl}]_2$  (3.9 mg, 10.0  $\mu\text{mol}$ ),  $\text{AgSbF}_6$  (8.2 mg, 23.9  $\mu\text{mol}$ ), and dppp (9.9 mg, 24.0  $\mu\text{mol}$ ) under nitrogen. The mixture was stirred at room temperature for 30 min. The resulting suspension was left to stand until the formed  $\text{AgCl}$  precipitated. The supernatant was used in Rh(I)-catalyzed Rearrangement of VCPs as the catalyst precursor.

**General procedure of Rh(I)-catalyzed Rearrangement of VCPs:** Under nitrogen, the above  $\text{Rh(I)}^+$  solution (2.0 mL) was added to a flame-dried glassware containing **2** (0.1 mmol) and the newly activated 4 Å molecular sieves (0.08 g) at rt. Then the glassware was immersed into an oil bath at 90 °C. The reaction was monitored by TLC. Upon completion, the reaction mixture was purified by flash column chromatography on silica gel to afford **4**.

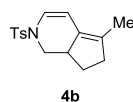

Run 1: Following general procedure E, 27.6 mg **2b** was used, 3 h. After flash column chromatography on silica gel (eluted with PE/EA 50:1), 16.4 mg **4b** was obtained in 59% yield.

Run 2: Following general procedure E, 28.2 mg **2b** was used, 3 h. After flash column chromatography on silica gel (eluted with PE/EA 50:1), 15.6 mg **4b** was obtained in 55% yield.

Average yield: 57%.

Colorless oil, TLC  $R_f$  = 0.38 (EA/PE = 1/10).  $^1\text{H}$  NMR (400 MHz,  $\text{CDCl}_3$ )  $\delta$  7.66 (d,  $J$  = 8.2 Hz, 2H), 7.29 (d,  $J$  = 8.2 Hz, 2H), 6.68 (d,  $J$  = 8.0 Hz, 1H), 5.63 (d,  $J$  = 8.0 Hz, 1H), 4.18 – 4.04 (m, 1H), 2.71 – 2.58 (m, 1H), 2.57 – 2.46 (m, 1H), 2.41 (s, 3H), 2.39 – 2.27 (m, 1H), 2.25 – 2.14 (m, 1H), 2.12 – 1.95 (m, 1H), 1.67 (s, 3H), 1.24 – 1.19 (m, 1H).  $^{13}\text{C}$  NMR (100 MHz,  $\text{CDCl}_3$ )  $\delta$  143.8, 135.3, 132.6, 129.9, 128.8, 127.1, 124.7, 104.1, 50.5, 42.2, 37.4, 28.1, 21.7, 13.8. IR (neat): 2925, 1595, 1351, 1271, 1238, 1167, 1092  $\text{cm}^{-1}$ . HRMS (ESI): calcd. for  $\text{C}_{16}\text{H}_{19}\text{NaNO}_2\text{S}$  ( $[\text{M}+\text{Na}]^+$ ): 312.1029, found 312.1030.

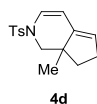

Run 1: Following general procedure D, 29.9 mg **2d** was used, 1 h. After flash column chromatography on silica gel (eluted with PE/EA 50:1), 26.1 mg **4d** was obtained in 87% yield.

Run 2: Following general procedure D, 28.7 mg **2d** was used, 1 h. After flash column chromatography on silica gel (eluted with PE/EA 50:1), 26.1 mg **4d** was obtained in 91% yield.

Average yield: 89%.

Colorless oil, TLC  $R_f$  = 0.43 (EA/PE = 1/10).  $^1\text{H}$  NMR (400 MHz,  $\text{CDCl}_3$ )  $\delta$  7.70 – 7.65 (dm,  $J$  = 8.0 Hz, 2H), 7.30 (d,  $J$  = 8.0 Hz, 2H), 6.69 (d,  $J$  = 8.1 Hz, 1H), 5.52 (d,  $J$  = 8.1 Hz, 1H), 5.34 – 5.25 (m, 1H), 3.85 (d,  $J$  = 10.9 Hz, 1H), 2.64 (d,  $J$  = 10.9 Hz, 1H), 2.53 – 2.44 (m, 1H), 2.41 (s, 3H), 2.30 – 2.22 (m, 1H), 1.81 – 1.75 (m, 1H), 1.53– 1.45 (m, 1H), 0.91 (s, 3H).  $^{13}\text{C}$  NMR (100 MHz,  $\text{CDCl}_3$ )  $\delta$  143.9, 141.1, 135.4, 129.9, 127.1, 125.3, 120.9, 103.6, 55.7, 44.1, 37.3, 30.2, 21.7, 21.5. IR (neat): 2925, 2855, 1725, 1665, 1593, 1493, 1456, 1399, 1342, 1251, 1210, 1165, 1094, 1039, 978, 946  $\text{cm}^{-1}$ . HRMS (ESI): calcd. for  $\text{C}_{16}\text{H}_{20}\text{NO}_2\text{S}$  ( $[\text{M}+\text{H}]^+$ ): 290.1209, found 290.1212.

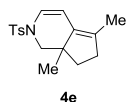

Run 1: Following general procedure D, 30.0 mg **2e** was used, 1 h. After flash column chromatography on silica gel (eluted with PE/EA 50:1), 24.7 mg **4e** was obtained in 82% yield.

Run 2: Following general procedure D, 29.7 mg **2e** was used, 1 h. After flash column chromatography on silica gel (eluted with PE/EA 50:1), 24.8 mg **4e** was obtained in 84% yield.

Average yield: 83%.

Colorless oil, TLC  $R_f$  = 0.45 (EA/PE = 1/10).  $^1\text{H}$  NMR (400 MHz,  $\text{CDCl}_3$ )  $\delta$  7.67 (d,  $J$  = 8.2 Hz, 2H), 7.29 (d,  $J$  = 8.2 Hz, 2H), 6.67 (d,  $J$  = 8.1 Hz, 1H), 5.52 (d,  $J$  = 8.1 Hz, 1H), 3.81 (d,  $J$  = 10.8 Hz, 1H), 2.58 (d,  $J$  = 10.8 Hz, 1H), 2.54 – 2.45 (m, 1H), 2.40 (s, 3H), 2.17 – 2.08 (m, 1H), 1.75 – 1.69 (m, 1H), 1.64 (s, 3H), 1.48 – 1.39 (m, 1H), 0.87 (s, 3H).  $^{13}\text{C}$  NMR (100 MHz,  $\text{CDCl}_3$ )  $\delta$  143.8, 135.5, 133.4, 130.3, 129.8, 127.1, 123.9, 102.2, 55.9, 44.8, 36.2, 35.6, 21.6, 13.8. IR (neat): 2956, 2921, 2852, 1594, 1445, 1403, 1355, 1345, 1305, 1263, 1231, 1185, 1167, 1091, 1065, 1022, 1009, 962, 943  $\text{cm}^{-1}$ . HRMS (ESI): calcd. for  $\text{C}_{17}\text{H}_{22}\text{NO}_2\text{S}$  ( $[\text{M}+\text{H}]^+$ ): 304.1366, found 304.1364.

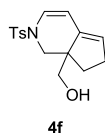

Run 1: Following general procedure D, 31.3 mg **2f** was used, 1 h. After flash column chromatography on silica gel (eluted with PE/EA 5:1), 27.8 mg **4f** was obtained in 89% yield.

Run 2: Following general procedure D, 31.6 mg **2f** was used, 1 h. After flash column chromatography on silica gel (eluted with PE/EA 5:1), 26.4 mg **4f** was obtained in 84% yield.

Average yield: 86%.

Colorless oil, TLC  $R_f$  = 0.48 (EA/PE = 1/2).  $^1\text{H}$  NMR (400 MHz,  $\text{CDCl}_3$ )  $\delta$  7.71 (d,  $J$  = 8.2 Hz, 2H), 7.33 (d,  $J$  = 8.2 Hz, 2H), 6.70 (d,  $J$  = 8.1 Hz, 1H), 5.55 (d,  $J$  = 8.1 Hz, 1H), 5.51 – 5.42 (m, 1H),

4.19 (d,  $J = 11.5$  Hz, 1H), 3.38 (dd,  $J = 11.3, 1.5$  Hz, 1H), 3.20 (d,  $J = 11.3$  Hz, 1H), 2.59 (d,  $J = 11.5$  Hz, 1H), 2.51 – 2.45 (m, 2H), 2.43 (s, 3H), 2.35 – 2.23 (m, 1H), 2.24 – 2.14 (m, 1H), 1.44 – 1.30 (m, 1H).  $^{13}\text{C}$  NMR (100 MHz,  $\text{CDCl}_3$ )  $\delta$  144.3, 136.9, 135.3, 130.0, 127.2, 125.3, 124.4, 103.8, 62.4, 50.20, 50.17, 32.0, 30.1, 21.7. IR (neat): 2924, 2855, 1345, 1165, 1101, 1034, 1020  $\text{cm}^{-1}$ . HRMS (ESI): calcd. for  $\text{C}_{16}\text{H}_{20}\text{NO}_3\text{S}$  ( $[\text{M}+\text{H}]^+$ ): 306.1158, found 306.1155.

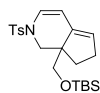

**4g**

Run 1: Following general procedure D, 41.9 mg **2g** was used, 1 h. After flash column chromatography on silica gel (eluted with PE/EA 50:1), 37.2 mg **4g** was obtained in 89% yield.

Run 2: Following general procedure D, 42.2 mg **2g** was used, 1 h. After flash column chromatography on silica gel (eluted with PE/EA 50:1), 37.5 mg **4g** was obtained in 89% yield.

Average yield: 89%.

White solid, TLC  $R_f = 0.51$  (EA/PE = 1/10), m.p. = 115–117  $^{\circ}\text{C}$ .  $^1\text{H}$  NMR (400 MHz,  $\text{CDCl}_3$ )  $\delta$  7.68 (d,  $J = 8.1$  Hz, 2H), 7.29 (d,  $J = 8.1$  Hz, 2H), 6.66 (d,  $J = 8.1$  Hz, 1H), 5.50 (d,  $J = 8.1$  Hz, 1H), 5.43 – 5.39 (m, 1H), 4.28 (d,  $J = 10.8$  Hz, 1H), 3.35 (dd,  $J = 9.7, 1.3$  Hz, 1H), 3.13 (d,  $J = 9.7$  Hz, 1H), 2.49 (d,  $J = 10.8$  Hz, 1H), 2.46 – 2.36 (m, 1H), 2.41 (s, 3H), 2.28 – 2.16 (m, 2H), 1.36 – 1.25 (m, 1H), 0.89 (s, 9H), 0.03 (s, 3H), 0.01 (s, 3H).  $^{13}\text{C}$  NMR (100 MHz,  $\text{CDCl}_3$ )  $\delta$  143.8, 137.0, 135.3, 129.9, 127.2, 125.6, 123.8, 103.6, 62.6, 50.5, 50.3, 32.4, 30.5, 26.0, 21.7, 18.4, -5.3, -5.5. IR (neat): 2954, 2928, 2856, 1638, 1590, 1462, 1397, 1364, 1351, 1276, 1249, 1198, 1169, 1104, 1086, 1021, 1013, 976, 938, 915  $\text{cm}^{-1}$ . HRMS (ESI): calcd. for  $\text{C}_{22}\text{H}_{34}\text{NO}_3\text{SSi}$  ( $[\text{M}+\text{H}]^+$ ): 420.2023, found 420.2037.

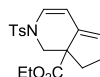

**4h**

Run 1: Following general procedure D, 37.3 mg **2h** was used, 1 h. After flash column chromatography on silica gel (eluted with PE/EA 10:1), 31.9 mg **4h** was obtained in 86% yield.

Run 2: Following general procedure D, 34.5 mg **2h** was used, 1 h. After flash column chromatography on silica gel (eluted with PE/EA 10:1), 28.2 mg **4h** was obtained in 82% yield.

Average yield: 84%.

Colorless oil, TLC  $R_f = 0.14$  (EA/PE = 1/10).  $^1\text{H}$  NMR (400 MHz,  $\text{CDCl}_3$ )  $\delta$  7.68 (d,  $J = 8.2$  Hz, 2H), 7.30 (d,  $J = 8.2$  Hz, 2H), 6.71 (d,  $J = 8.2$  Hz, 1H), 5.67 – 5.46 (m, 2H), 4.58 (d,  $J = 11.2$  Hz, 1H), 4.04 – 3.95 (m, 2H), 2.70 (d,  $J = 11.2$  Hz, 1H), 2.58 – 2.46 (m, 1H), 2.42 (s, 3H), 2.38 – 2.32 (m, 1H), 2.27 (dd,  $J = 12.9, 6.9$  Hz, 1H), 1.75 – 1.63 (m, 1H), 1.18 (t,  $J = 7.1$  Hz, 3H).  $^{13}\text{C}$  NMR (100 MHz,  $\text{CDCl}_3$ )  $\delta$  173.2, 144.0, 135.4, 135.2, 129.9, 127.2, 126.0, 125.7, 103.8, 61.3, 55.5, 52.1, 35.3, 31.2, 21.7, 14.2. IR (neat): 2926, 1727, 1346, 1236, 1164, 1021, 1007  $\text{cm}^{-1}$ . HRMS (ESI): calcd. for  $\text{C}_{18}\text{H}_{22}\text{NO}_4\text{S}$  ( $[\text{M}+\text{H}]^+$ ): 348.1264, found 348.1264.

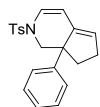

**4i**

Run 1: Following general procedure D, 35.7 mg **2i** was used, 1 h. After flash column chromatography on silica gel (eluted with PE/EA 50:1), 31.1 mg **4i** was obtained in 87% yield.

Run 2: Following general procedure D, 35.4 mg **2i** was used, 1 h. After flash column chromatography on silica gel (eluted with PE/EA 50:1), 29.2 mg **4i** was obtained in 82% yield.

Average yield: 84%.

White solid, TLC  $R_f$  = 0.54 (EA/PE = 1/5), m.p. = 150-153 °C.  $^1\text{H}$  NMR (400 MHz,  $\text{CDCl}_3$ )  $\delta$  7.38 (d,  $J$  = 8.0 Hz, 2H), 7.18 – 7.09 (m, 7H), 6.65 (d,  $J$  = 8.0 Hz, 1H), 5.73 (d,  $J$  = 8.0 Hz, 1H), 5.70 (s, 1H), 4.55 (d,  $J$  = 11.5 Hz, 1H), 3.05 (d,  $J$  = 11.5 Hz, 1H), 2.38 (s, 3H), 2.29 – 2.19 (m, 2H), 2.14 – 2.03 (m, 1H), 1.94 – 1.83 (m, 1H).  $^{13}\text{C}$  NMR (100 MHz,  $\text{CDCl}_3$ )  $\delta$  143.5, 142.5, 138.4, 135.5, 129.7, 128.2, 126.9, 126.6, 126.44, 126.36, 124.6, 104.1, 55.3, 52.8, 40.1, 30.2, 21.6. IR (neat): 3053, 3025, 2964, 2923, 2849, 1639, 1591, 1494, 1451, 1397, 1343, 1305, 1254, 1210, 1164, 1111, 1004, 972, 919  $\text{cm}^{-1}$ . HRMS (ESI): calcd. for  $\text{C}_{21}\text{H}_{22}\text{NO}_2\text{S}$  ( $[\text{M}+\text{H}]^+$ ): 352.1366, found 352.1365.

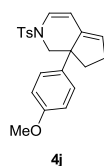

Run 1: Following general procedure D, 38.5 mg **2j** was used, 1 h. After flash column chromatography on silica gel (eluted with PE/EA 20:1), 32.7 mg **4j** was obtained in 85% yield.

Run 2: Following general procedure D, 37.7 mg **2j** was used, 1 h. After flash column chromatography on silica gel (eluted with PE/EA 20:1), 33.5 mg **4j** was obtained in 89% yield.

Average yield: 87%.

Colorless oil, TLC  $R_f$  = 0.24 (EA/PE = 1/10).  $^1\text{H}$  NMR (400 MHz,  $\text{CDCl}_3$ )  $\delta$  7.37 (d,  $J$  = 8.2 Hz, 2H), 7.11 (d,  $J$  = 8.2 Hz, 2H), 7.02 (d,  $J$  = 8.7 Hz, 2H), 6.66 (d,  $J$  = 8.0 Hz, 1H), 6.64 (d,  $J$  = 8.7 Hz, 2H), 5.72 (d,  $J$  = 8.0 Hz, 1H), 5.70 – 5.64 (m, 1H), 4.47 (d,  $J$  = 11.6 Hz, 1H), 3.76 (s, 3H), 3.05 (d,  $J$  = 11.6 Hz, 1H), 2.38 (s, 3H), 2.27 – 2.18 (m, 2H), 2.08 – 2.01 (m, 1H), 1.89 – 1.80 (m, 1H).  $^{13}\text{C}$  NMR (100 MHz,  $\text{CDCl}_3$ )  $\delta$  158.2, 143.4, 138.6, 135.7, 134.4, 129.6, 127.7, 126.7, 126.3, 124.4, 113.5, 104.1, 55.6, 55.2, 52.1, 40.1, 30.1, 21.6. IR (neat): 2922, 2849, 1641, 1592, 1511, 1457, 1398, 1343, 1301, 1248, 1163, 1107, 1032, 1004, 971  $\text{cm}^{-1}$ . HRMS (ESI): calcd. for  $\text{C}_{22}\text{H}_{24}\text{NO}_3\text{S}$  ( $[\text{M}+\text{H}]^+$ ): 382.1471, found 382.1473.

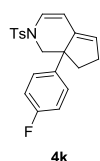

Run 1: Following general procedure D, 36.9 mg **2k** was used, 2 h. After flash column chromatography on silica gel (eluted with PE/EA 20:1), 28.8 mg **4k** was obtained in 78% yield.

Run 2: Following general procedure D, 34.9 mg **2k** was used, 2 h. After flash column chromatography on silica gel (eluted with PE/EA 20:1), 28.7 mg **4k** was obtained in 82% yield.

Average yield: 80%.

Colorless oil, TLC  $R_f$  = 0.40 (EA/PE = 1/10).  $^1\text{H}$  NMR (400 MHz,  $\text{CDCl}_3$ )  $\delta$  7.36 (d,  $J$  = 8.2 Hz, 2H), 7.11 (d,  $J$  = 8.2 Hz, 2H), 7.07 – 7.01 (m, 2H), 6.79 – 6.71 (m, 2H), 6.70 (d,  $J$  = 8.0 Hz, 1H), 5.73 (d,  $J$  = 8.0 Hz, 1H), 5.71 – 5.66 (m, 1H), 4.44 (d,  $J$  = 11.8 Hz, 1H), 3.09 (d,  $J$  = 11.8 Hz, 1H), 2.39 (s, 3H), 2.29 – 2.14 (m, 2H), 2.07 – 2.00 (m, 1H), 1.91 – 1.83 (m, 1H).  $^{13}\text{C}$  NMR (100 MHz,

CDCl<sub>3</sub>)  $\delta$  161.6 (d,  $J$  = 244.4 Hz), 143.7, 138.3, 138.1 (d,  $J$  = 3.0 Hz), 135.7, 129.7, 128.3 (d,  $J$  = 7.9 Hz), 126.8, 126.5, 124.8, 114.8 (d,  $J$  = 21.0 Hz), 103.9, 55.6, 52.3, 40.1, 30.1, 21.5. IR (neat): 2924, 2849, 1641, 1590, 1508, 1455, 1397, 1343, 1305, 1227, 1186, 1162, 1112, 1094, 1005, 972 cm<sup>-1</sup>. HRMS (ESI): calcd. for C<sub>21</sub>H<sub>21</sub>FNO<sub>2</sub>S ([M+H]<sup>+</sup>): 370.1272, found 370.1279.

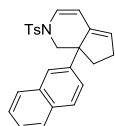

**4l**

Run 1: Following general procedure D, 40.4 mg **2l** was used, 2 h. After flash column chromatography on silica gel (eluted with PE/EA 20:1), 34.6 mg **4l** was obtained in 86% yield.

Run 2: Following general procedure D, 39.9 mg **2l** was used, 2 h. After flash column chromatography on silica gel (eluted with PE/EA 20:1), 34.5 mg **4l** was obtained in 86% yield.

Average yield: 86%.

White solid, TLC  $R_f$  = 0.38 (EA/PE = 1/10), m.p. = 63-66 °C. <sup>1</sup>H NMR (400 MHz, CDCl<sub>3</sub>)  $\delta$  7.76 – 7.72 (m, 1H), 7.64 – 7.60 (m, 1H), 7.56 (d,  $J$  = 8.6 Hz, 1H), 7.45 – 7.38 (m, 3H), 7.28 (dd,  $J$  = 8.6, 1.9 Hz, 1H), 7.15 (d,  $J$  = 8.3 Hz, 2H), 6.74 (d,  $J$  = 8.0 Hz, 1H), 6.65 (s, 1H), 6.63 (s, 1H), 5.86 (d,  $J$  = 8.0 Hz, 1H), 5.80 – 5.75 (m, 1H), 4.63 (d,  $J$  = 12.1 Hz, 1H), 3.27 (d,  $J$  = 12.1 Hz, 1H), 2.29 – 2.14 (m, 3H), 2.11 (s, 3H), 2.01 – 1.92 (m, 1H). <sup>13</sup>C NMR (100 MHz, CDCl<sub>3</sub>)  $\delta$  143.2, 139.9, 138.3, 135.7, 133.1, 132.4, 129.1, 128.1, 128.0, 127.3, 126.4, 125.8, 125.7, 125.6, 125.1, 125.0, 104.3, 55.9, 53.1, 40.0, 30.2, 21.5. IR (neat): 3054, 2925, 2863, 1915, 1692, 1639, 1594, 1502, 1453, 1398, 1341, 1249, 1162, 1108, 1005, 972 cm<sup>-1</sup>. HRMS (EI): calcd. for C<sub>25</sub>H<sub>23</sub>NO<sub>2</sub>S (M<sup>+</sup>): 401.1444, found 401.1443.

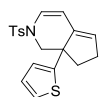

**4m**

Run 1: Following general procedure D, 35.3 mg **2m** was used, 1 h. After flash column chromatography on silica gel (eluted with PE/EA 50:1), 30.5 mg **4m** was obtained in 86% yield.

Run 2: Following general procedure D, 35.0 mg **2m** was used, 1 h. After flash column chromatography on silica gel (eluted with PE/EA 50:1), 28.6 mg **4m** was obtained in 82% yield.

Average yield: 84%.

Colorless oil, TLC  $R_f$  = 0.30 (EA/PE = 1/10). <sup>1</sup>H NMR (400 MHz, CDCl<sub>3</sub>)  $\delta$  7.52 (d,  $J$  = 8.2 Hz, 2H), 7.21 (d,  $J$  = 8.2 Hz, 2H), 7.04 (dd,  $J$  = 4.9, 1.3 Hz, 1H), 6.79 – 6.72 (m, 2H), 6.67 (d,  $J$  = 8.1 Hz, 1H), 5.67 (d,  $J$  = 8.1 Hz, 1H), 5.64 – 5.59 (m, 1H), 4.48 (d,  $J$  = 11.4 Hz, 1H), 3.01 (d,  $J$  = 11.4 Hz, 1H), 2.54 – 2.45 (m, 1H), 2.40 (s, 3H), 2.34 – 2.27 (m, 1H), 2.20 – 2.13 (m, 1H), 1.92 – 1.82 (m, 1H). <sup>13</sup>C NMR (100 MHz, CDCl<sub>3</sub>)  $\delta$  147.7, 143.7, 139.1, 135.5, 129.8, 127.0, 126.7, 126.1, 124.0, 123.9, 123.6, 103.5, 55.6, 50.6, 40.5, 30.4, 21.7. IR (neat): 3091, 2924, 2850, 1641, 1592, 1493, 1454, 1398, 1345, 1303, 1255, 1201, 1165, 1108, 1002, 970, 918 cm<sup>-1</sup>. HRMS (ESI): calcd. for C<sub>19</sub>H<sub>20</sub>NO<sub>2</sub>S<sub>2</sub> ([M+H]<sup>+</sup>): 358.0930, found 358.0937.

## VII. General Procedure of One-pot Cycloisomerization/[5+1] Reaction Sequence

**Preparation of solution of cationic Au(I) catalyst:** Anhydrous DCE (1.0 mL) was added to a mixture of Au(JohnPhos)Cl (2.6 mg, 4.9  $\mu$ mol) and AgSbF<sub>6</sub> (2.1 mg, 6.1  $\mu$ mol) under nitrogen. The mixture was stirred at room temperature for 30 min. The resulting suspension was left to stand until the formed AgCl precipitated. The supernatant was used in Au(I)-catalyzed cycloisomerization reactions as the catalyst precursor.

**Preparation of solution of cationic Rh(I) catalyst:** Anhydrous DCE (1.0 mL) was added to a mixture of [Rh(CO)<sub>2</sub>Cl]<sub>2</sub> (2.0 mg, 5.1  $\mu$ mol), AgSbF<sub>6</sub> (4.1 mg, 11.9  $\mu$ mol), and dppp (4.1 mg, 9.9  $\mu$ mol) under nitrogen. The mixture was stirred at room temperature for 30 min. The resulting suspension was left to stand until the formed AgCl precipitated. The supernatant was used in Rh(I)-catalyzed [5+1] cycloaddition reactions as the catalyst precursor.

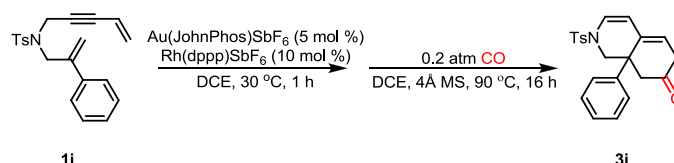

**One-pot Cycloisomerization/[5+1] Reaction Sequence:** Under nitrogen, the above Au(I)<sup>+</sup> solution (1.0 mL) and Rh(I)<sup>+</sup> solution (1.0 mL) were added to a flame-dried glassware containing **1i** (0.1 mmol) at 30 °C. The reaction was monitored by TLC and stirred for 1 h. Upon completion, the newly activated 4 Å molecular sieves (0.08 g) were added to the reaction mixture, then the reaction mixture was bubbled with a mixed gas of CO/N<sub>2</sub> (v/v = 1/4) for 10 min. The glassware was immersed into an oil bath at 90 °C and reacted under the atmosphere pressure of the mixed gas of CO/N<sub>2</sub> (v/v = 1/4). The reaction was monitored by TLC and stirred for 16 h. Upon completion, the reaction mixture was purified by flash column chromatography on silica gel to afford **3i**.

Run 1: Following procedure, 34.6 mg **1i** was used. After flash column chromatography on silica gel (eluted with PE/EA 3:1), 25.5 mg **3i** was obtained in 68% yield.

Run 2: Following procedure, 35.0 mg **1i** was used. After flash column chromatography on silica gel (eluted with PE/EA 3:1), 27.2 mg **3i** was obtained in 72% yield.

Average yield: 70%.

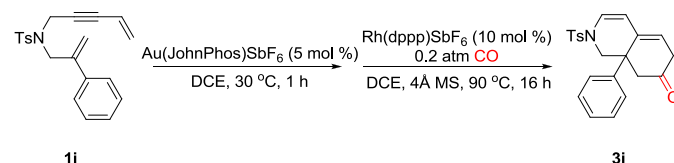

**One-pot Cycloisomerization/[5+1] Reaction Sequence:** Under nitrogen, the above Au(I)<sup>+</sup> solution (1.0 mL) was added to a flame-dried glassware containing **1i** (0.1 mmol) at 30 °C. The reaction was monitored by TLC and stirred for 1 h. Upon completion, the above Rh(I)<sup>+</sup> solution (1.0 mL) and the newly activated 4 Å molecular sieves (0.08 g) were added to the reaction mixture. Then the reaction mixture was bubbled with a mixed gas of CO/N<sub>2</sub> (v/v = 1/4) for 10 min. The glassware was immersed into an oil bath at 90 °C and reacted under the atmosphere pressure of the mixed gas of CO/N<sub>2</sub> (v/v = 1/4). The reaction was monitored by TLC and stirred for 16 h. Upon completion, the reaction mixture was purified by flash column chromatography on silica gel to afford **3i**.

Run 1: Following procedure, 35.5 mg **1i** was used. After flash column chromatography on silica gel (eluted with PE/EA 3:1), 29.6 mg **3i** was obtained in 77% yield.

Run 2: Following procedure, 34.9 mg **1i** was used. After flash column chromatography on silica gel (eluted with PE/EA 3:1), 27.4 mg **3i** was obtained in 73% yield.

Average yield: 75%.

### VIII. General Procedure of One-pot Cycloisomerization/Rearrangement Sequence

**Preparation of solution of cationic Au(I) catalyst:** Anhydrous DCE (1.0 mL) was added to a mixture of Au(JohnPhos)Cl (2.6 mg, 4.9  $\mu$ mol) and AgSbF<sub>6</sub> (2.1 mg, 6.1  $\mu$ mol) under nitrogen. The mixture was stirred at room temperature for 30 min. The resulting suspension was left to stand until the formed AgCl precipitated. The supernatant was used in Au(I)-catalyzed cycloisomerization reactions as the catalyst precursor.

**Preparation of solution of cationic Rh(I) catalyst:** Anhydrous DCE (1.0 mL) was added to a mixture of [Rh(CO)<sub>2</sub>Cl]<sub>2</sub> (2.0 mg, 5.1  $\mu$ mol), AgSbF<sub>6</sub> (4.1 mg, 11.9  $\mu$ mol), and dppp (5.0 mg, 12.1  $\mu$ mol) under nitrogen. The mixture was stirred at room temperature for 30 min. The resulting suspension was left to stand until the formed AgCl precipitated. The supernatant was used in Rh(I)-catalyzed [5+1] cycloaddition reactions as the catalyst precursor.

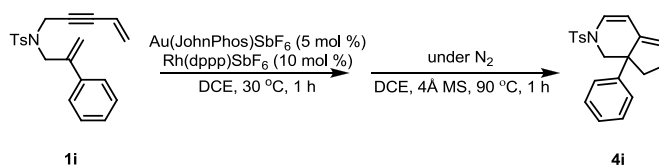

**One-pot Cycloisomerization/[5+1] Reaction Sequence:** Under nitrogen, the above Au(I)<sup>+</sup> solution (1.0 mL) and Rh(I)<sup>+</sup> solution (1.0 mL) were added to a flame-dried glassware containing **1i** (0.1 mmol) at 30 °C. The reaction was stirred for 1 h (the cyclopropanation reaction was completed, as monitored by TLC). Then the newly activated 4 Å molecular sieves (0.08 g) were added to the reaction mixture and the glassware was immersed into an oil bath at 90 °C. The reaction was stirred for 1 h (the vinyl-cyclopropane isomerization reaction was completed, as monitored by TLC). The reaction mixture was directly purified by flash column chromatography on silica gel to afford **4i**.

Run 1: Following procedure, 35.3 mg **1i** was used. After flash column chromatography on silica gel (eluted with PE/EA 20:1), 26.9 mg **4i** was obtained in 76% yield.

Run 2: Following procedure, 34.9 mg **1i** was used. After flash column chromatography on silica gel (eluted with PE/EA 20:1), 26.1 mg **4i** was obtained in 75% yield.

Average yield: 76%.

## IX. General Procedure of Pauson-Khand Cycloaddition

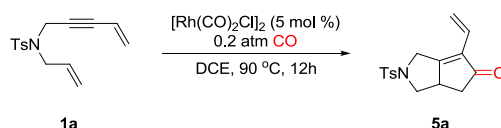

Under argon, the solution of **1a** (0.1 mmol) in DCE (2.0 mL) was added to a flame-dried glassware containing  $[\text{Rh}(\text{CO})_2\text{Cl}]_2$  (2.0 mg, 5.0  $\mu\text{mol}$ ) at rt. Then the reaction mixture was bubbled with a mixed gas of  $\text{CO}/\text{N}_2$  ( $v/v = 1/4$ ) for 10 min. The glassware was immersed into an oil bath at 90 °C and reacted under the atmosphere pressure of the mixed gas of  $\text{CO}/\text{N}_2$  ( $v/v = 1/4$ ). The reaction was monitored by TLC and stirred for 12 h. Upon completion, the reaction mixture was purified by flash column chromatography on silica gel to afford **5a**.

Run 1: Following procedure, 28.2 mg **1a** was used. After flash column chromatography on silica gel (eluted with PE/EA 3:1), 26.6 mg **5a** was obtained in 86% yield.

Run 2: Following procedure, 28.1 mg **1a** was used. After flash column chromatography on silica gel (eluted with PE/EA 3:1), 25.4 mg **5a** was obtained in 82% yield.

Average yield: 84%.

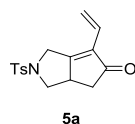

Colorless oil, TLC  $R_f = 0.41$  (EA/PE = 1/2).  $^1\text{H}$  NMR (400 MHz,  $\text{CDCl}_3$ )  $\delta$  7.72 (d,  $J = 8.2$  Hz, 2H), 7.33 (d,  $J = 8.2$  Hz, 2H), 6.29 (dd,  $J = 17.8, 11.3$  Hz, 1H), 5.73 (d,  $J = 17.8$  Hz, 1H), 5.44 (d,  $J = 11.3$  Hz, 1H), 4.39 (d,  $J = 17.0$  Hz, 1H), 4.10 – 3.96 (m, 2H), 3.20 – 2.98 (m, 1H), 2.64 (dd,  $J = 18.0, 6.5$  Hz, 1H), 2.59 – 2.49 (m, 1H), 2.42 (s, 3H), 2.09 (dd,  $J = 18.0, 3.6$  Hz, 1H).  $^{13}\text{C}$  NMR (100 MHz,  $\text{CDCl}_3$ )  $\delta$  205.7, 171.5, 144.3, 134.0, 133.6, 130.1, 127.6, 124.9, 121.6, 52.4, 47.8, 42.1, 40.0, 21.7. IR (neat): 2923, 2853, 1711, 1344, 1306, 1289, 1261, 1220, 1161, 1092, 1047  $\text{cm}^{-1}$ . HRMS (ESI): calcd. for  $\text{C}_{16}\text{H}_{18}\text{NO}_3\text{S}$  ( $[\text{M}+\text{H}]^+$ ): 304.1002, found 304.0997.

## X. General Procedure of Synthetic Transformation

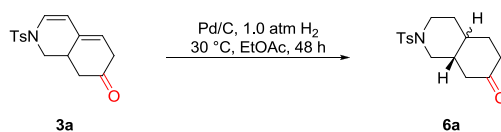

The solution of **3a** (38.2 mg, 0.13 mmol) in EA (1.3 mL) was added to flame-dried glassware containing Pd/C (12.0 mg) at rt. Then the reaction mixture was bubbled with 1.0 atm H<sub>2</sub> (balloon) for 10 min. The glassware was immersed into an oil bath at 30 °C and reacted under the 1.0 atm H<sub>2</sub> (balloon). The reaction was monitored by TLC and stirred for 48 h. Upon completion, the reaction mixture was purified by flash column chromatography on silica gel (eluted with PE/EA 3:1) to afford **6a** (26.0 mg, 67%, dr = 1.6/1).

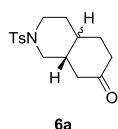

Colorless oil, TLC  $R_f$  = 0.40 (EA/PE = 1/1). <sup>1</sup>H NMR (400 MHz, CDCl<sub>3</sub>)  $\delta$  7.67 – 7.56 (m, 3.2H + 2H), 7.35 – 7.28 (m, 3.2H + 2H), 3.87 (ddt,  $J$  = 11.6, 4.1, 2.0 Hz, 1.6H), 3.70 (ddd,  $J$  = 11.4, 3.8, 1.8 Hz, 1.6H), 3.56 – 3.42 (m, 1H), 3.13 (dd,  $J$  = 11.6, 4.4 Hz, 1H), 2.75 – 2.60 (m, 1.6H + 1H), 2.43 (s, 4.8H + 3H), 2.40 – 2.37 (m, 1.6H), 2.37 – 2.17 (m, 4.8H + 4H), 2.01 – 1.92 (m, 5H), 1.90 – 1.62 (m, 8H), 1.46 – 1.35 (m, 3.2H), 1.31 – 1.21 (m, 2H). <sup>13</sup>C NMR (100 MHz, CDCl<sub>3</sub>)  $\delta$  211.0, 209.0, 143.8, 133.3, 133.22, 129.83, 129.81, 127.72, 127.66, 51.7, 49.5, 46.5, 45.1, 44.6, 42.1, 41.2, 40.9, 39.4, 37.5, 37.1, 32.3, 32.0, 31.1, 29.0, 25.7, 21.6. IR (neat): 1715, 1340, 1306, 1164, 1092, 1014 cm<sup>-1</sup>. HRMS (ESI): calcd. for C<sub>16</sub>H<sub>22</sub>NO<sub>3</sub>S ([M+H]<sup>+</sup>): 308.1315, found 308.1316.

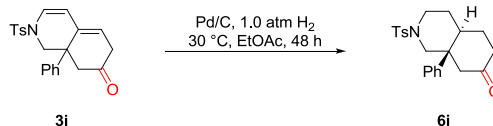

The solution of **3i** (47.2 mg, 0.12 mmol) in EA (1.2 mL) was added to flame-dried glassware containing Pd/C (14.0 mg) at rt. Then the reaction mixture was bubbled with 1.0 atm H<sub>2</sub> (balloon) for 10 min. The glassware was immersed into an oil bath at 30 °C and reacted under the 1.0 atm H<sub>2</sub> (balloon). The reaction was monitored by TLC and stirred for 48 h. Upon completion, the reaction mixture was purified by flash column chromatography on silica gel (eluted with PE/EA 3:1) to afford **6i** (31.6 mg, 66%, dr > 20/1).

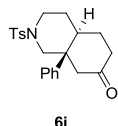

Colorless oil, TLC  $R_f$  = 0.45 (EA/PE = 1/1). <sup>1</sup>H NMR (500 MHz, CDCl<sub>3</sub>)  $\delta$  7.65 (d,  $J$  = 8.3 Hz, 2H), 7.61 (d,  $J$  = 7.6 Hz, 2H), 7.36 (d,  $J$  = 8.3 Hz, 2H), 7.34 – 7.29 (m, 2H), 7.28 – 7.21 (m, 1H), 4.10 (d,  $J$  = 11.6 Hz, 1H), 4.09 – 4.04 (m, 1H), 2.80 (dd,  $J$  = 15.8, 1.3 Hz, 1H), 2.58 (dd,  $J$  = 16.9, 5.1 Hz, 1H), 2.50 (dd,  $J$  = 11.7, 3.1 Hz, 1H), 2.46 (s, 3H), 2.41 – 2.33 (m, 1H), 2.30 (d,  $J$  = 11.6 Hz, 1H),

2.11 (d,  $J = 15.8$  Hz, 1H), 1.89 – 1.78 (m, 1H), 1.78 – 1.71 (m, 1H), 1.71 – 1.66 (m, 1H), 1.66 – 1.59 (m, 1H), 1.59 – 1.51 (m, 1H).  $^{13}\text{C}$  NMR (125 MHz,  $\text{CDCl}_3$ )  $\delta$  209.4, 143.8, 140.9, 132.6, 129.7, 129.1, 128.2, 127.8, 127.0, 57.9, 53.2, 47.0, 43.7, 43.1, 41.0, 27.0, 26.7, 21.5. IR (neat): 2959, 2925, 1468, 1106, 1033, 1021  $\text{cm}^{-1}$ . HRMS (ESI): calcd. for  $\text{C}_{22}\text{H}_{26}\text{NO}_3\text{S}$  ( $[\text{M}+\text{H}]^+$ ): 384.1628, found 384.1629.

NMR analysis of **6i** by the DEPT and 2D NMR.

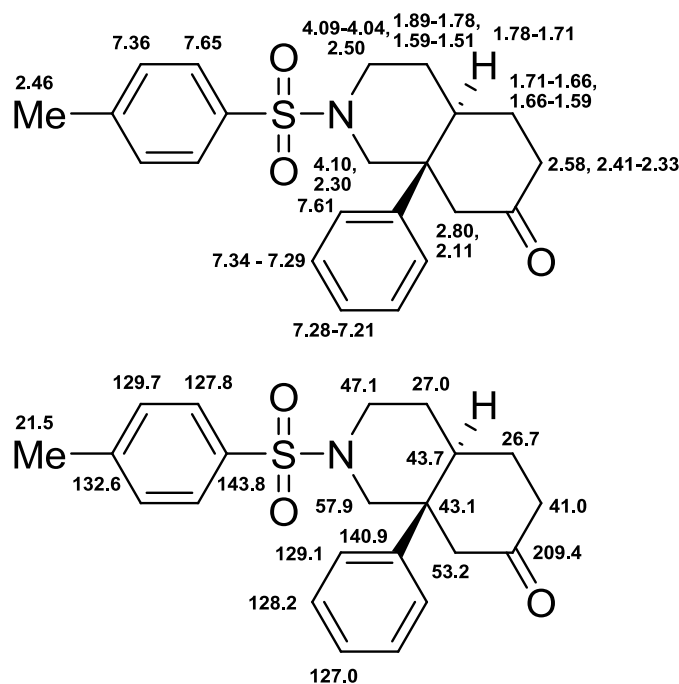

Determination of the stereostructure of **6i** by 2D NOESY.

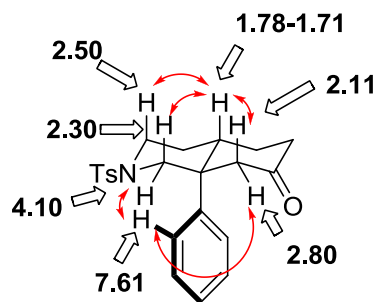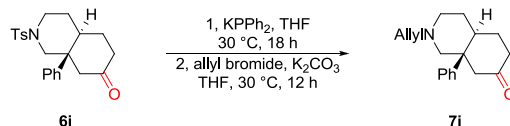

Follow the reported procedure<sup>16, 17</sup>: To a solution of **6i** (40.0 mg, 0.1 mmol) in THF (1 mL) was added  $\text{KPh}_2$  (0.6 mL, 0.3 mmol, 0.5 M solution in THF) at 0 °C. The solution was stirred for 18 h at 30 °C. 1M HCl (0.5 mL) was added to the solution at 0 °C and the temperature was raised to rt. The resulting mixture was stirred for 30 min, added with saturated aqueous  $\text{NaHCO}_3$  (5 mL), extracted with DCM (3×10 mL), dried over  $\text{Na}_2\text{SO}_4$ , filtered, and concentrated. The crude amine was used without further purification. To the generated amine dissolved in THF (1 mL) was added

K<sub>2</sub>CO<sub>3</sub> (55.0 mg, 0.4 mmol) and allyl bromide (0.035 mL, 0.4 mmol). The solution was stirred at 30 °C for 12 h. Upon completion, The resulting mixture was quenched by water (10 mL) and extracted with ether (3×10 mL). The organic layer was dried over Na<sub>2</sub>SO<sub>4</sub>, filtered, and concentrated. The crude product was purified by flash column chromatography on silica gel (eluted with PE/EA 5:1) to afford **7i** (11.4 mg, 42%, dr > 20/1).

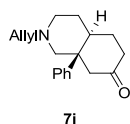

Colorless oil, TLC  $R_f$  = 0.36 (EA/PE = 1/5). <sup>1</sup>H NMR (400 MHz, CDCl<sub>3</sub>)  $\delta$  7.82 (d,  $J$  = 7.7 Hz, 2H), 7.32 – 7.23 (m, 2H), 7.22 – 7.16 (m, 1H), 5.94 – 5.78 (m, 1H), 5.15 (d,  $J$  = 17.5 Hz, 1H), 5.10 (d,  $J$  = 10.2 Hz, 1H), 3.15 (d,  $J$  = 11.0 Hz, 2H), 3.06 (dd,  $J$  = 13.5, 5.7 Hz, 1H), 2.92 (dd,  $J$  = 13.5, 6.6 Hz, 1H), 2.76 (d,  $J$  = 16.0 Hz, 1H), 2.57 (dd,  $J$  = 17.1, 5.2 Hz, 1H), 2.39 (ddd,  $J$  = 17.1, 12.1, 7.7 Hz, 1H), 2.25 – 2.09 (m, 2H), 2.01 (d,  $J$  = 11.3 Hz, 1H), 1.84 – 1.54 (m, 4H), 1.52 – 1.42 (m, 1H). <sup>13</sup>C NMR (100 MHz, CDCl<sub>3</sub>)  $\delta$  211.6, 143.4, 135.6, 130.0, 127.7, 126.5, 117.5, 66.6, 61.8, 54.8, 54.3, 44.7, 43.8, 41.4, 28.2, 26.9. IR (neat): 2939, 2793, 1708, 1498, 1462, 1152 cm<sup>-1</sup>. HRMS (ESI): calcd. for C<sub>18</sub>H<sub>24</sub>NO ([M+H]<sup>+</sup>): 270.1852, found 270.1849.

## XI. References

- (1) L. M. Geary, J. C. Leung, and M. J. Krische, *Chem. Eur. J.*, 2012, **18**, 16823.
- (2) S. E. Gibson, D. J. Hardick, P. R. Haycock, A. K. C. Kaufmann, A. Myasaki, M. J. Tozer, and A. J. P. White, *Chem. Eur. J.*, 2007, **13**, 7099.
- (3) F. Monnier, C. V.-L. Bray, D. Castillo, V. Aubert, S. Dérien, P. H. Dixneuf, L. Toupet, A. Ienco, and C. Mealli, *J. Am. Chem. Soc.*, 2007, **129**, 6037.
- (4) S. Y. Kim, Y. Park, S. Son, and Y. K. Chung, *Adv. Synth. Catal.*, 2012, **354**, 179.
- (5) T. J. Senter, O. O. Fadeyi, and C. W. Lindsley, *Org. Lett.*, 2012, **14**, 1869.
- (6) R. Hayashi, Z.-X. Ma, and R. P. Hsung, *Org. Lett.*, 2012, **14**, 252.
- (7) S. M. Smith, G. L. Hoang, R. Pal, M. O. B. Khaled, L. S. W. Pelter, X. C. Zeng, and J. M. Takacs, *Chem. Commun.*, 2012, **48**, 12180.
- (8) S. Li, K. Huang, B. Cao, J. Zhang, W. Wu, and X. Zhang, *Angew. Chem., Int. Ed.*, 2012, **51**, 8573.
- (9) C. Hollingworth, A. Hazari, M. N. Hopkinson, M. Tredwell, E. Benedetto, M. Huiban, A. D. Gee, J. M. Brown, and V. Gouverneur, *Angew. Chem., Int. Ed.*, 2011, **50**, 2613.
- (10) T. J. Mickelson, J. L. Kooviach, and C. J. Forsyth, *J. Org. Chem.*, 1996, **61**, 9617.
- (11) J. Mo, L. Xu, J. Ruan, S. Liu, and J. Xiao, *Chem. Commun.*, 2006, 3591.
- (12) W. Pei, J. Mo, and J. Xiao, *J. Organomet. Chem.*, 2005, **690**, 3546.
- (13) C. Ferrer, M. Raducan, C. Nevado, C. K. Claverie, and A. M. Echavarren, *Tetrahedron*, 2007, **63**, 6306.
- (14) R. C. Lemoine, A. C. Petersen, L. Setti, T. Baldinger, J. Wanner, A. Jekle, G. Heilek, A. deRosier, C. Ji, and D. M. Rotstein, *Bioorg. Med. Chem. Lett.*, 2010, **20**, 1674.
- (15) L. C. Pattenden, R. A. J. Wybrow, S. A. Smith, and J. P. A. Harrity, *Org. Lett.*, 2006, **8**, 3089.
- (16) S. Yoshida, K. Igawa, and K. Tomooka, *J. Am. Chem. Soc.*, 2012, **134**, 19358.
- (17) S. Kang, D. -g. Kim, and Y. H. Rhee, *Chem. Eur. J.*, 2014, **20**, 16391.

## XII. NMR Spectra

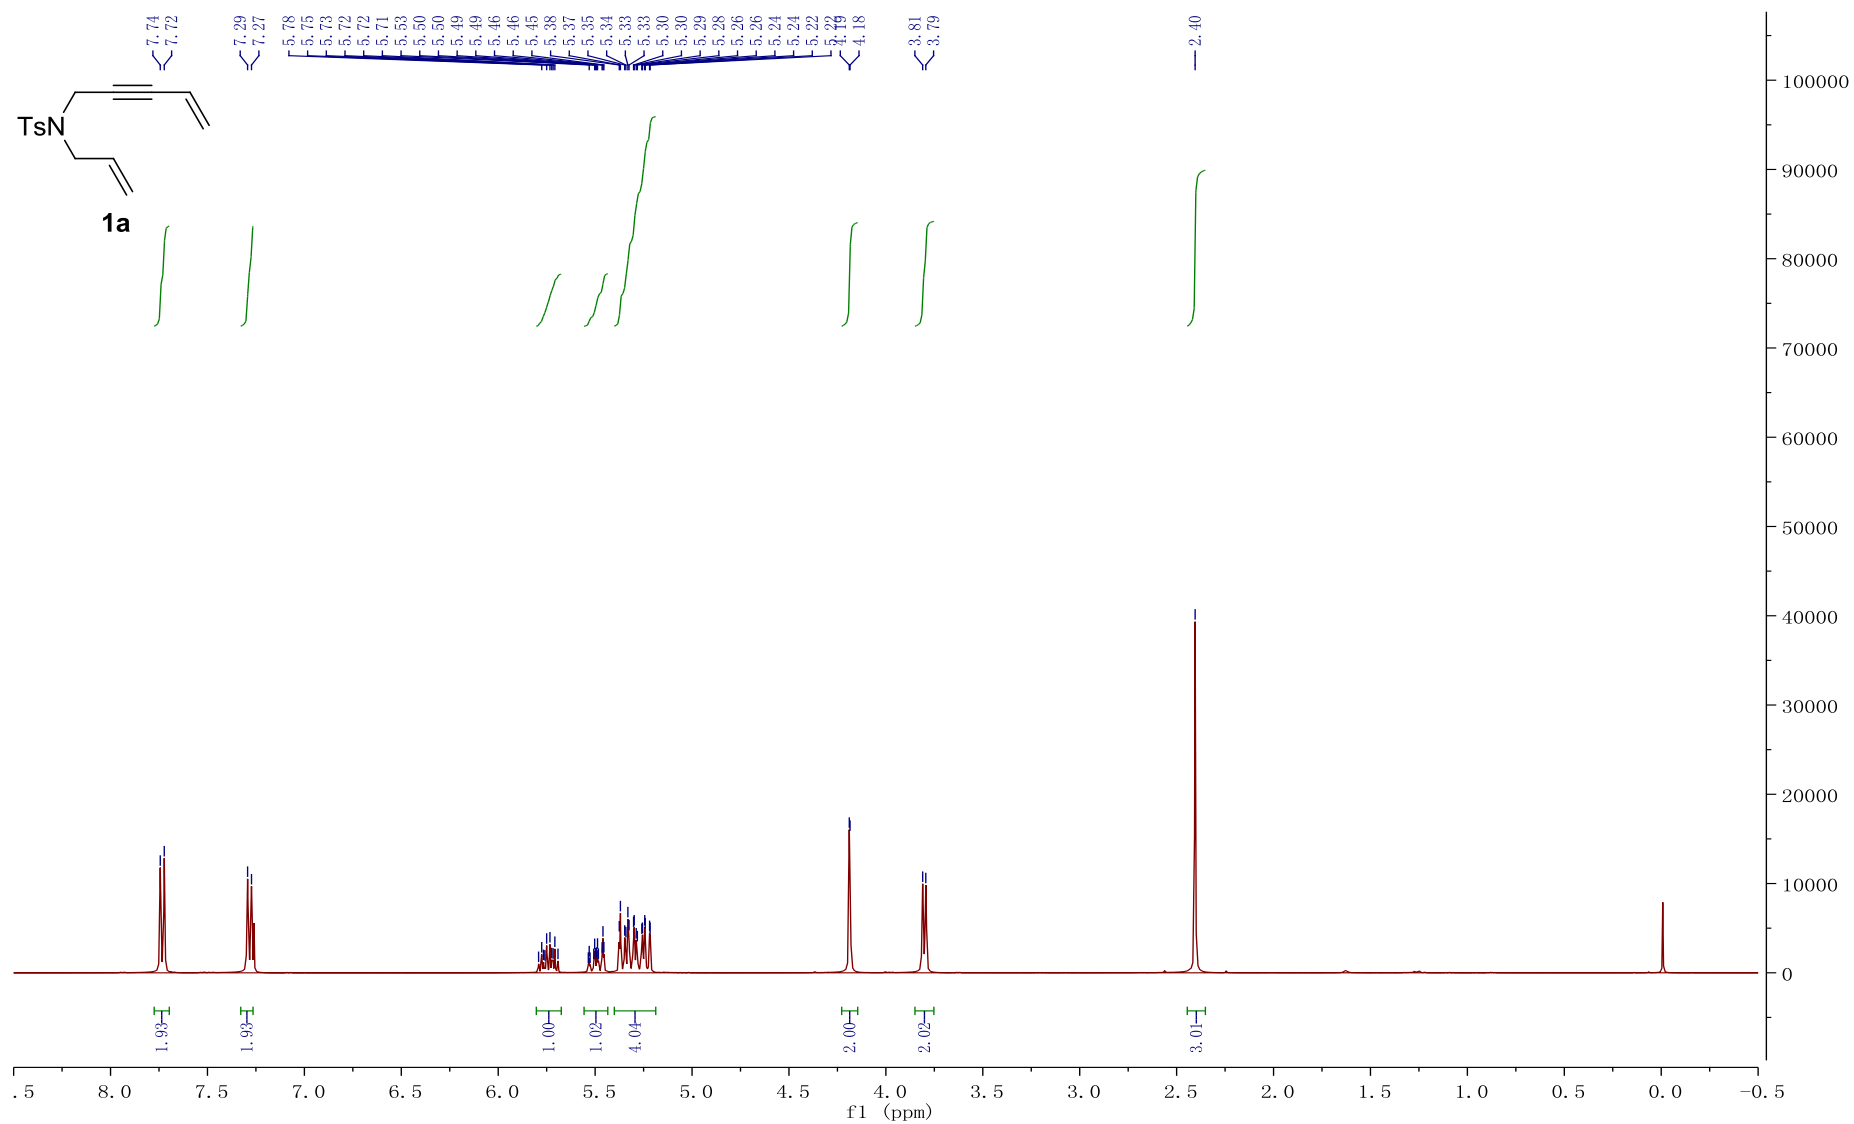

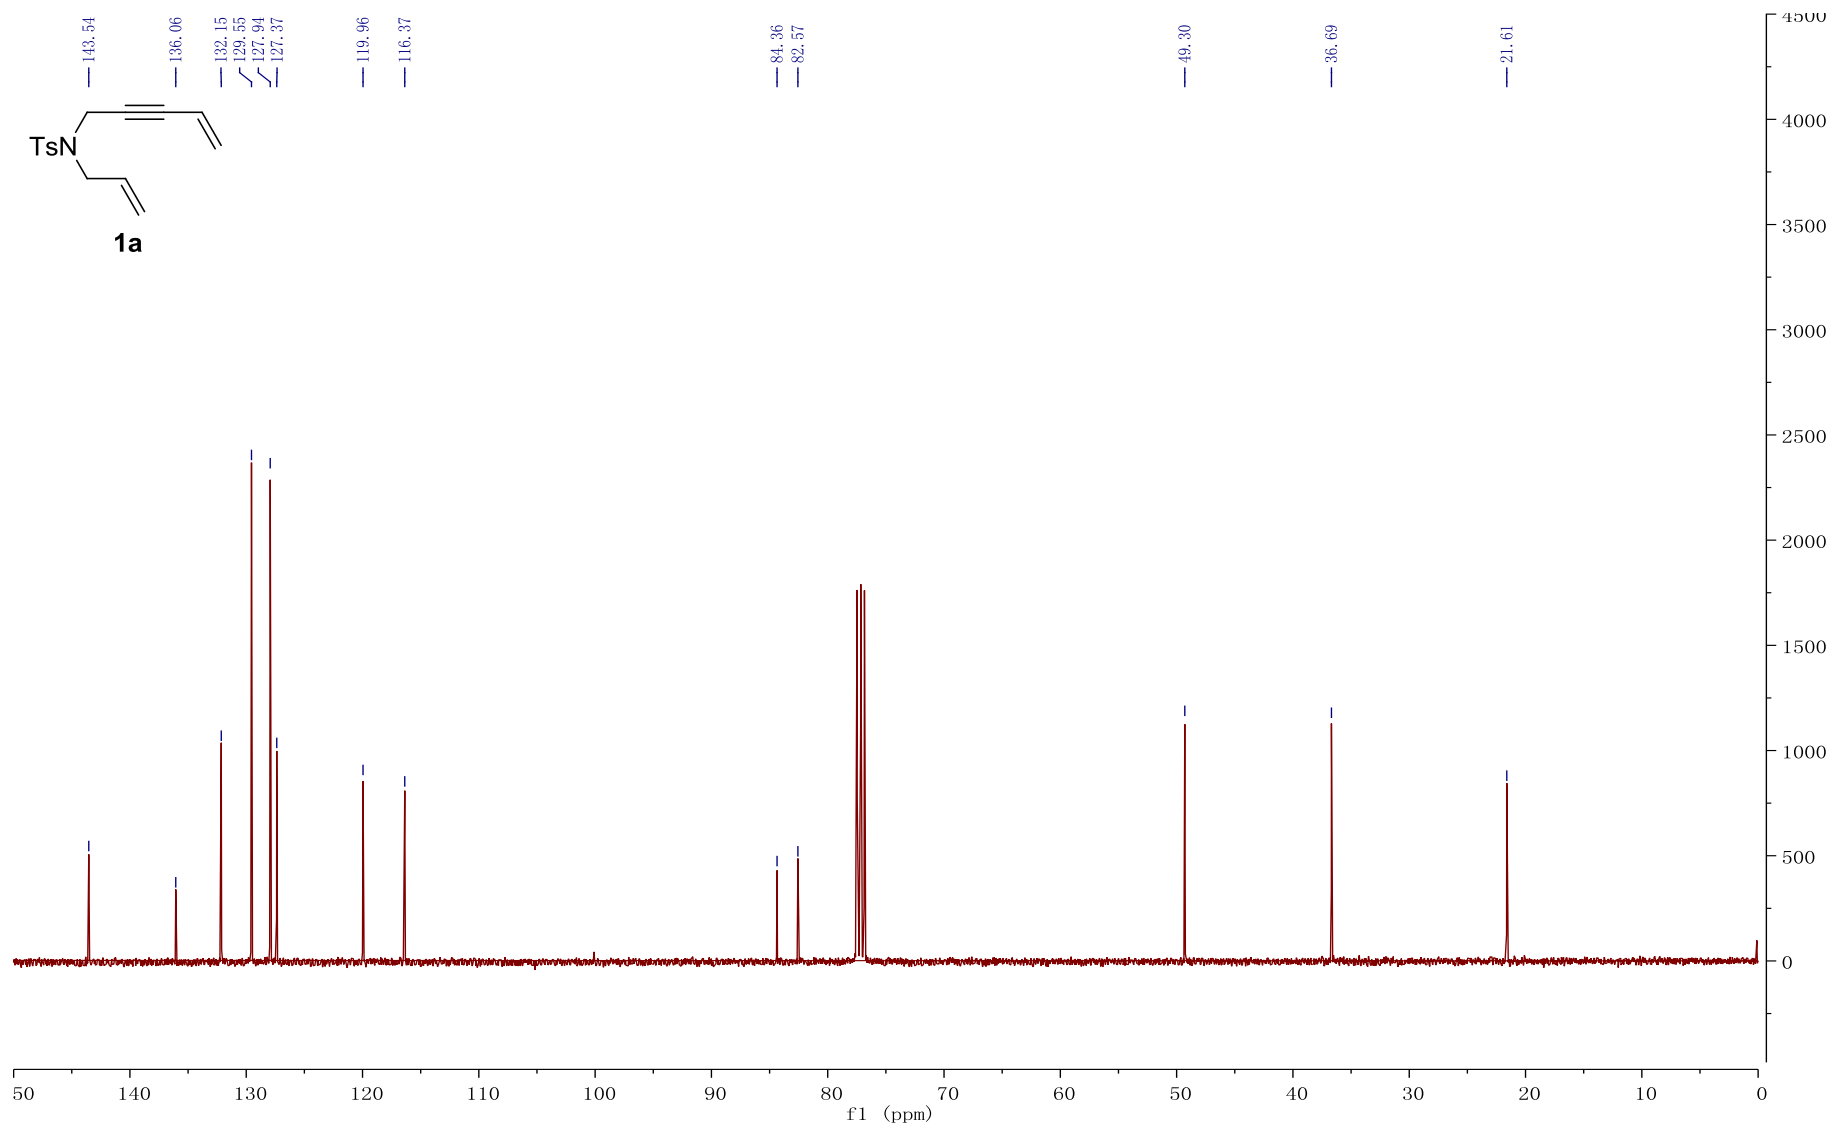



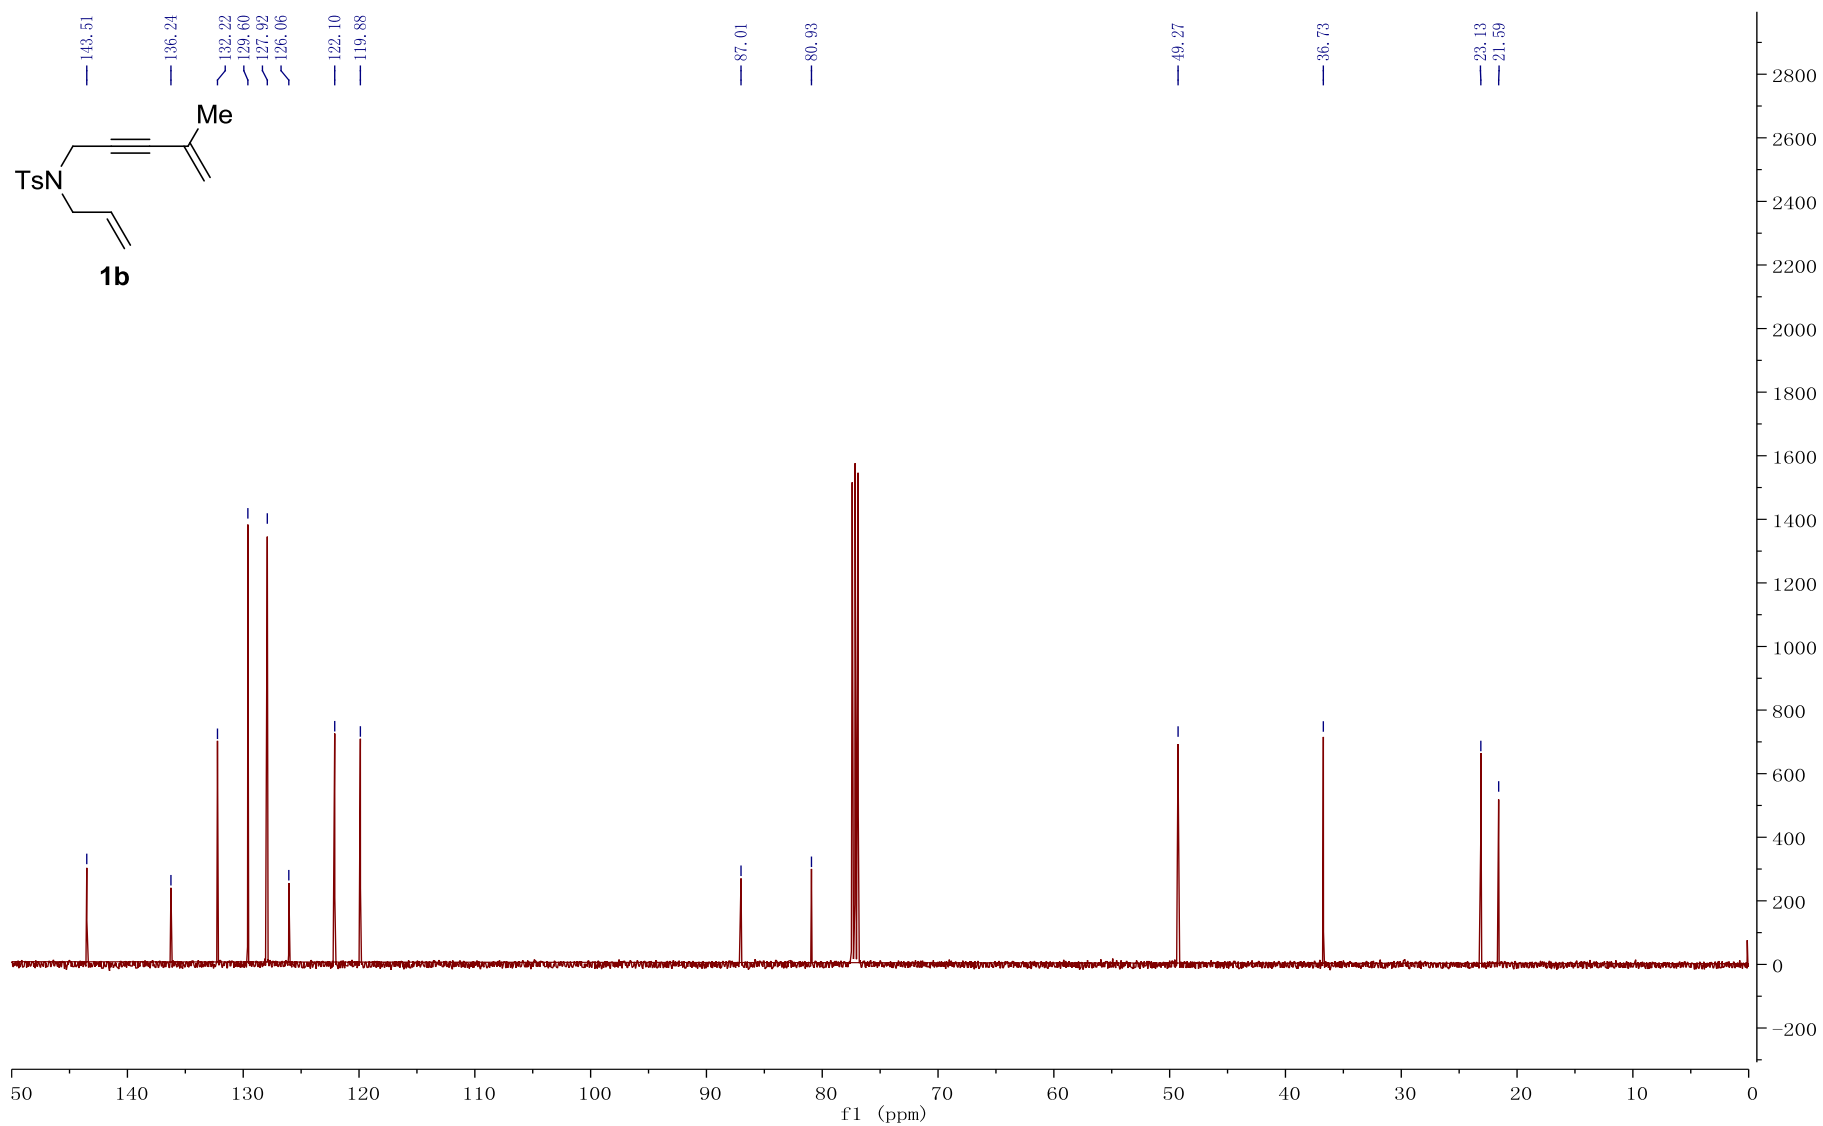

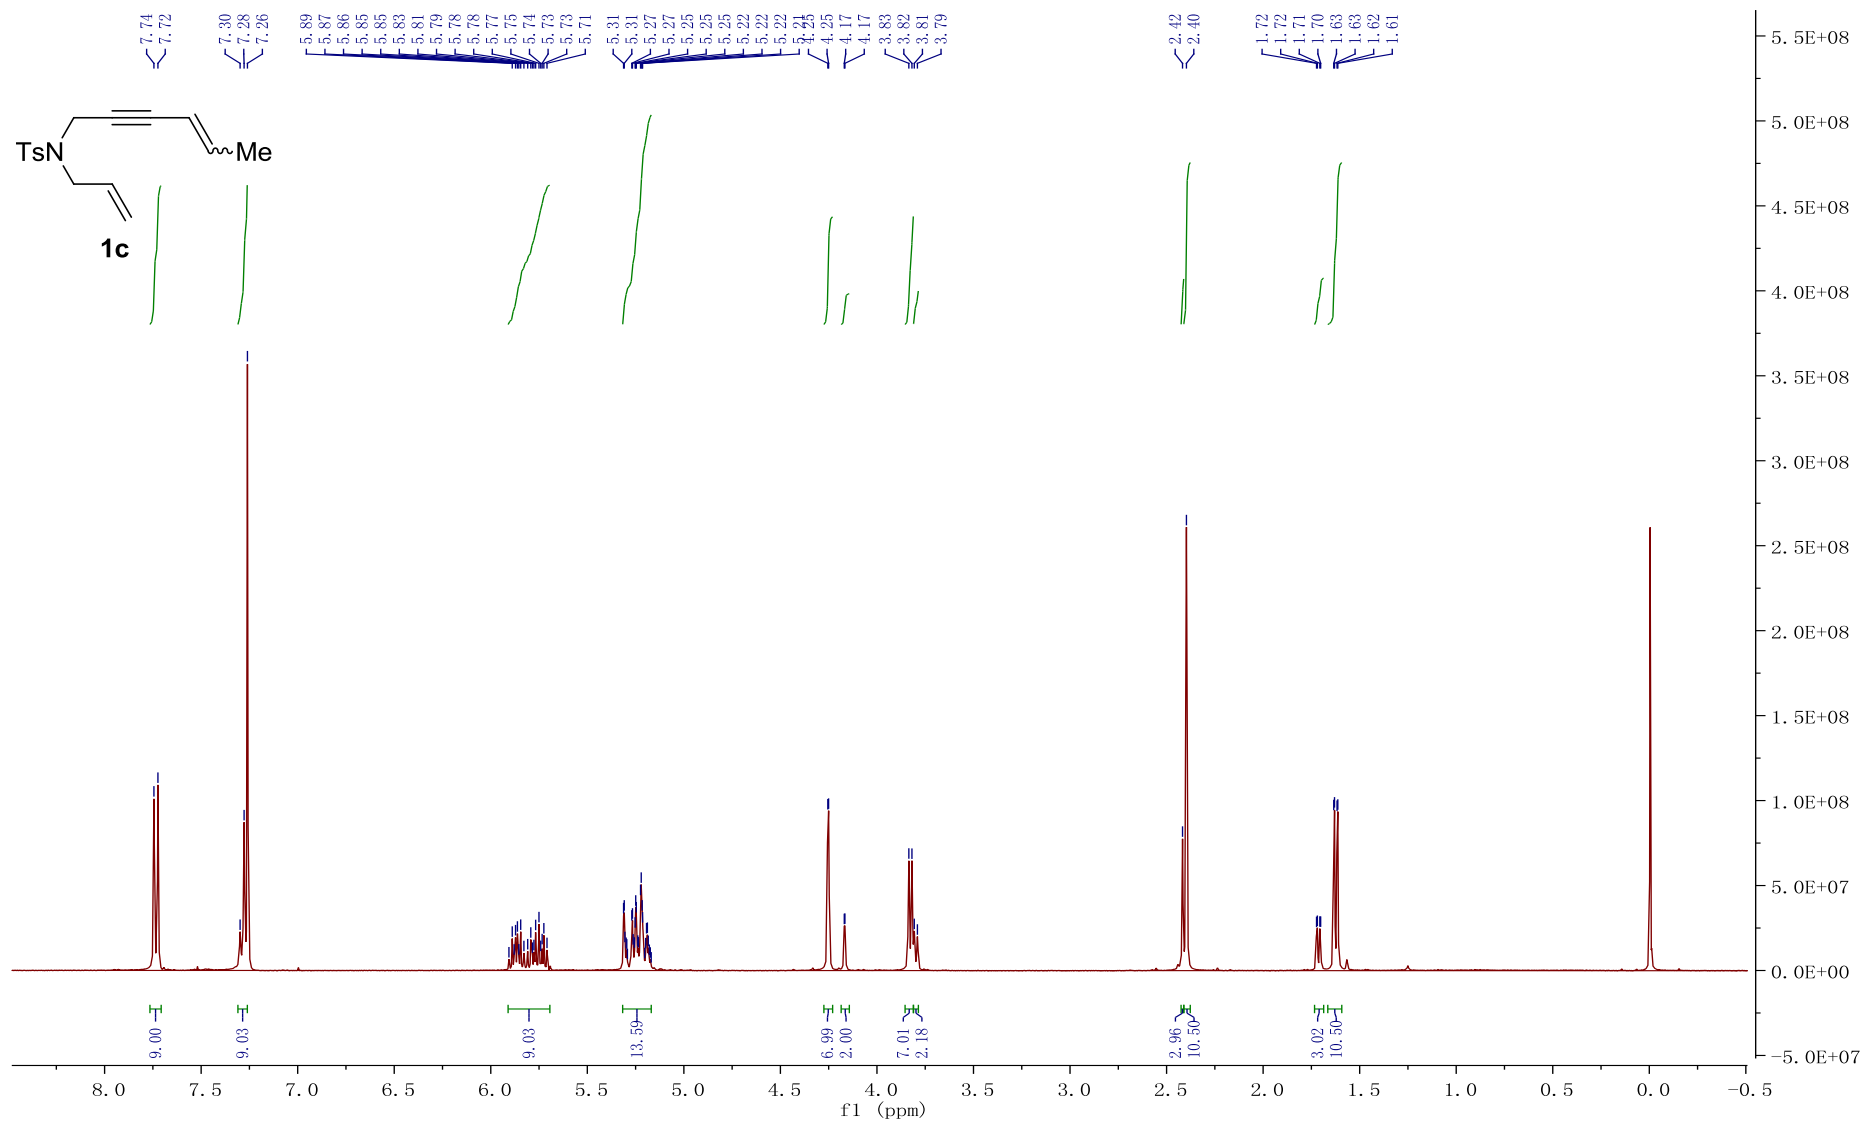

S50

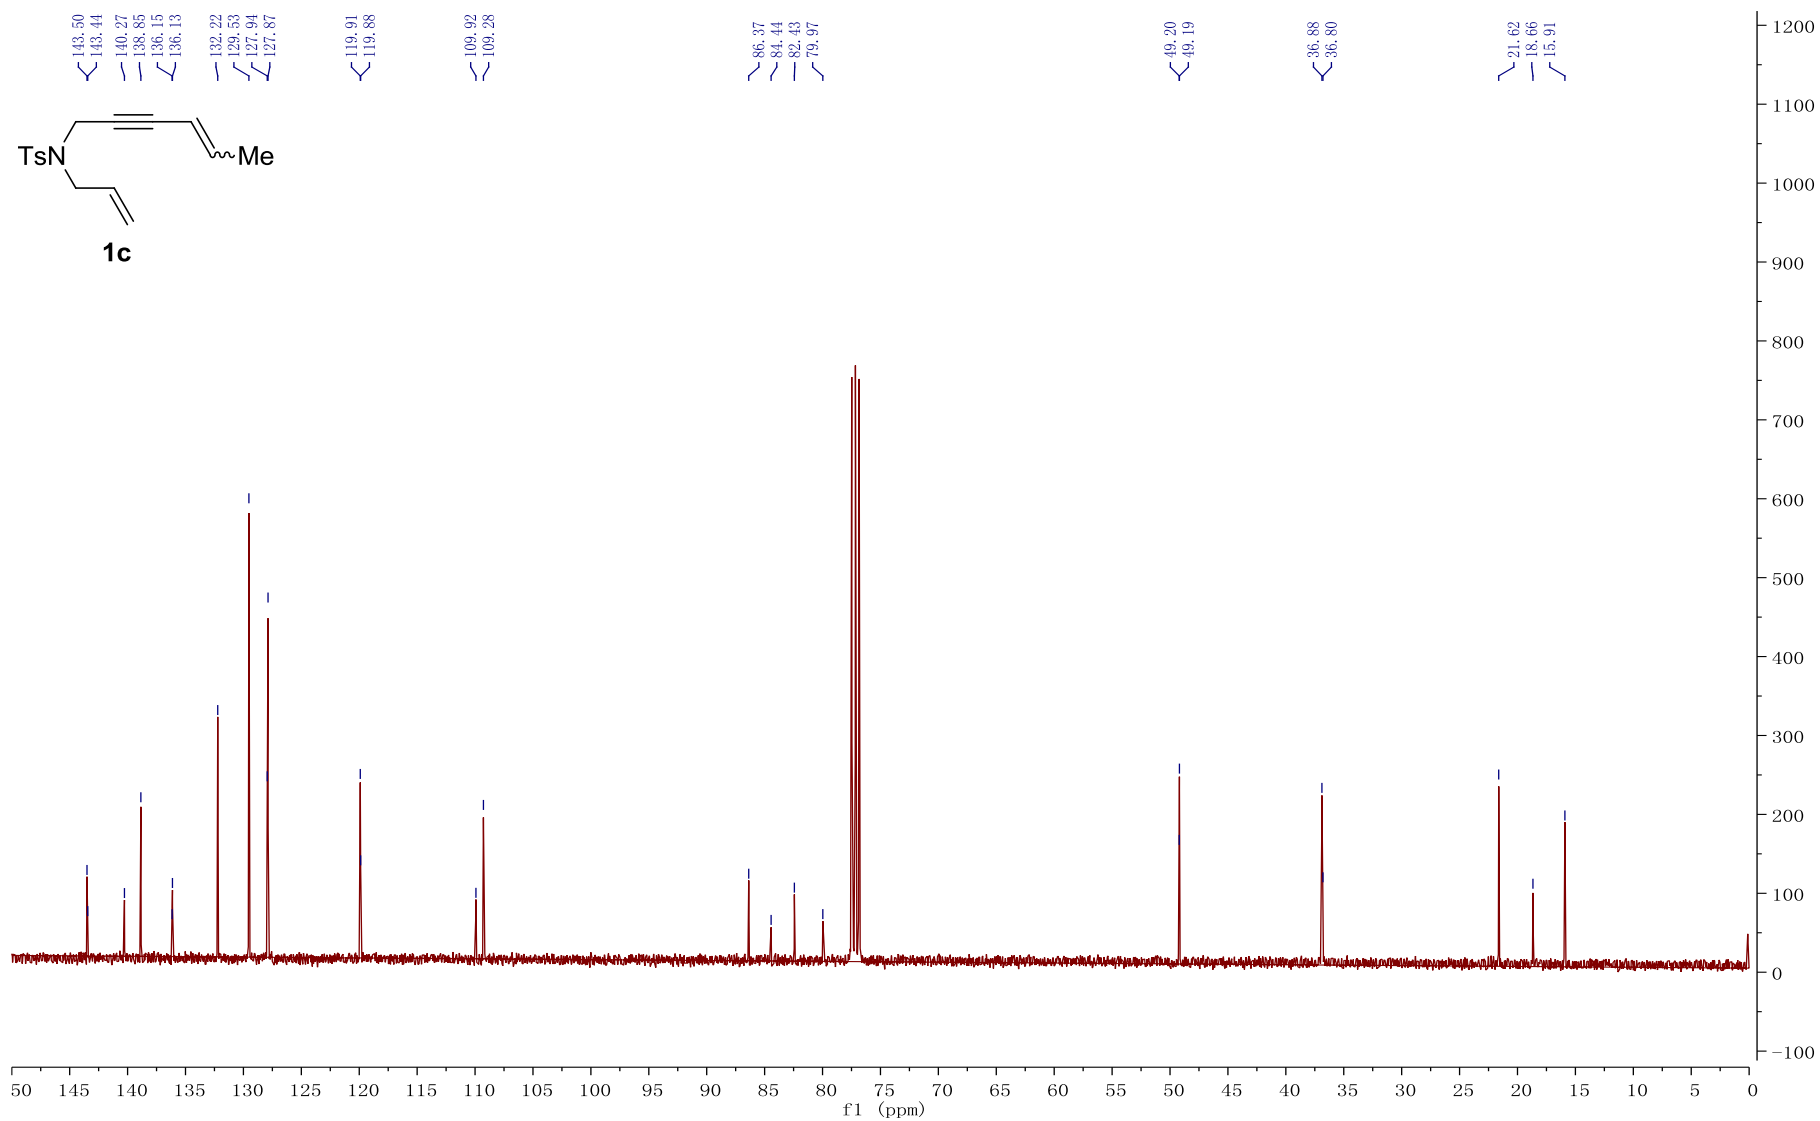

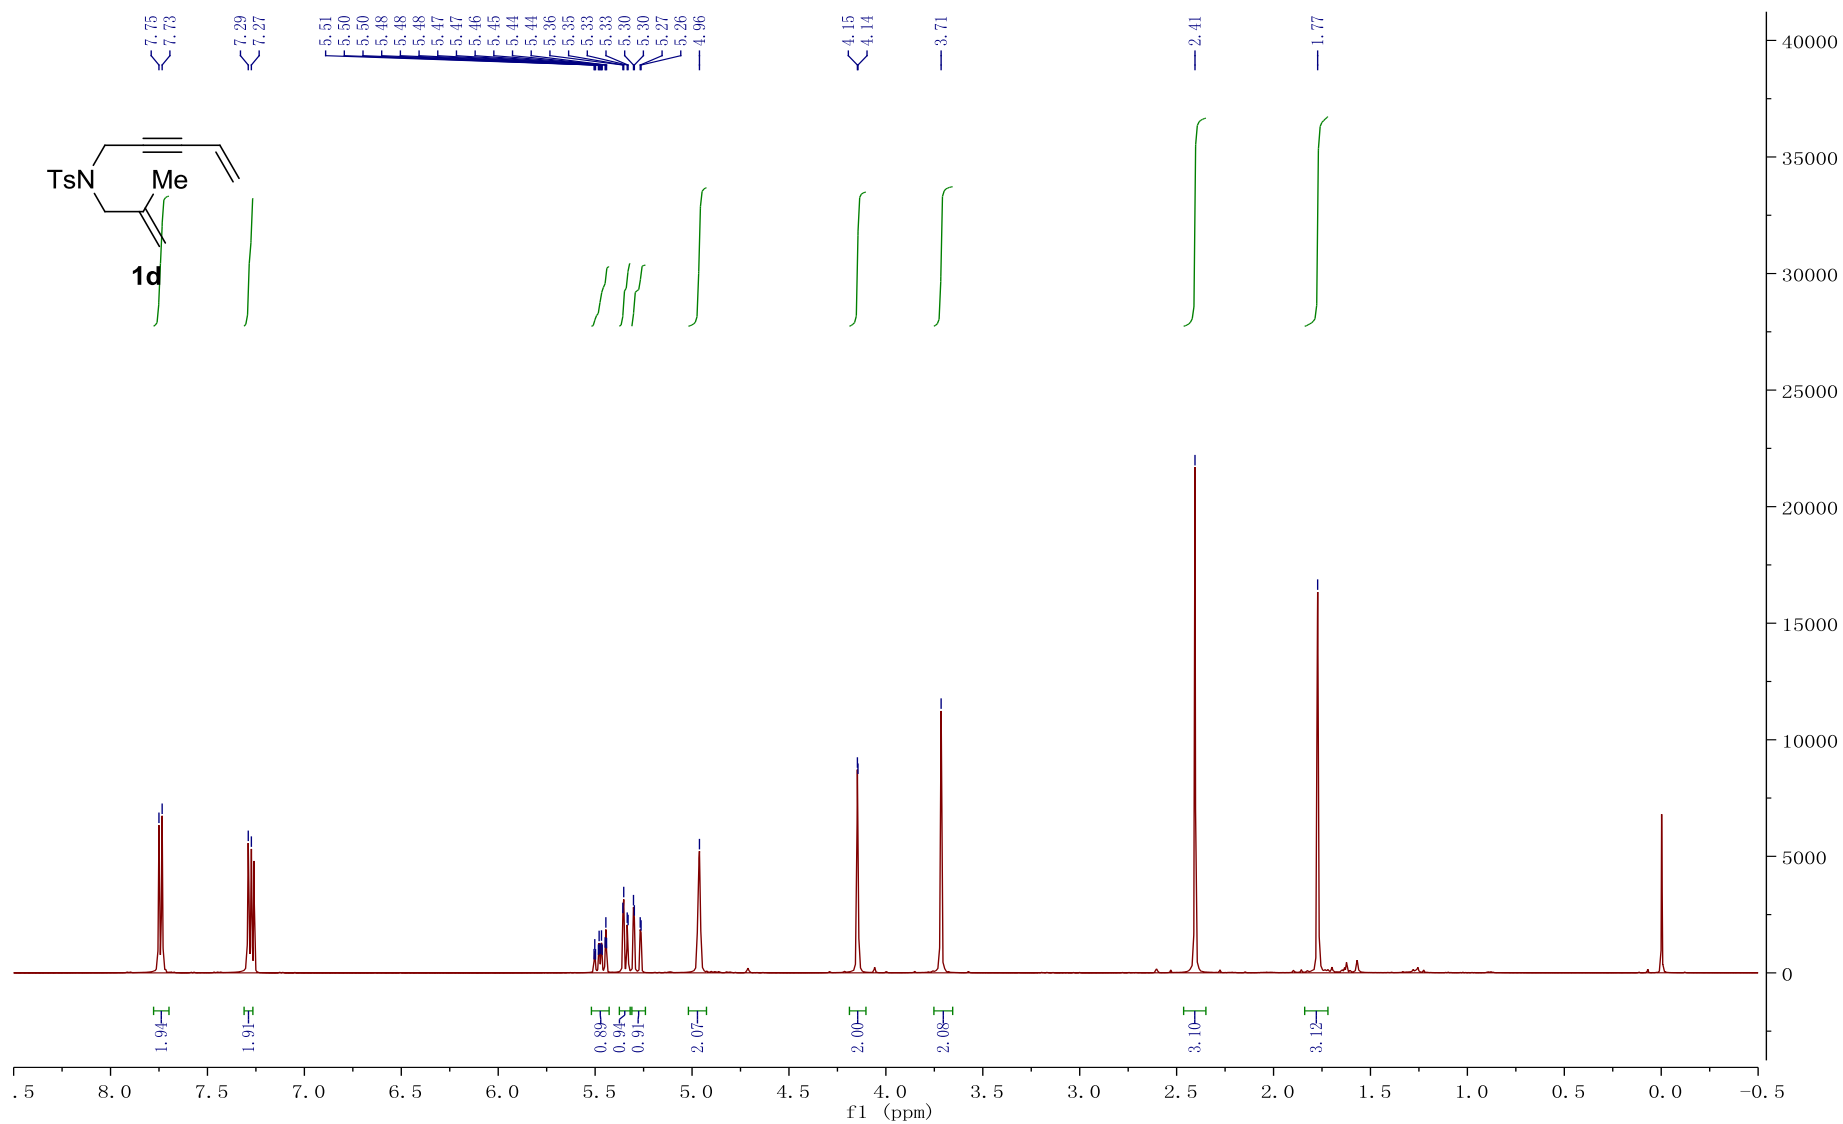

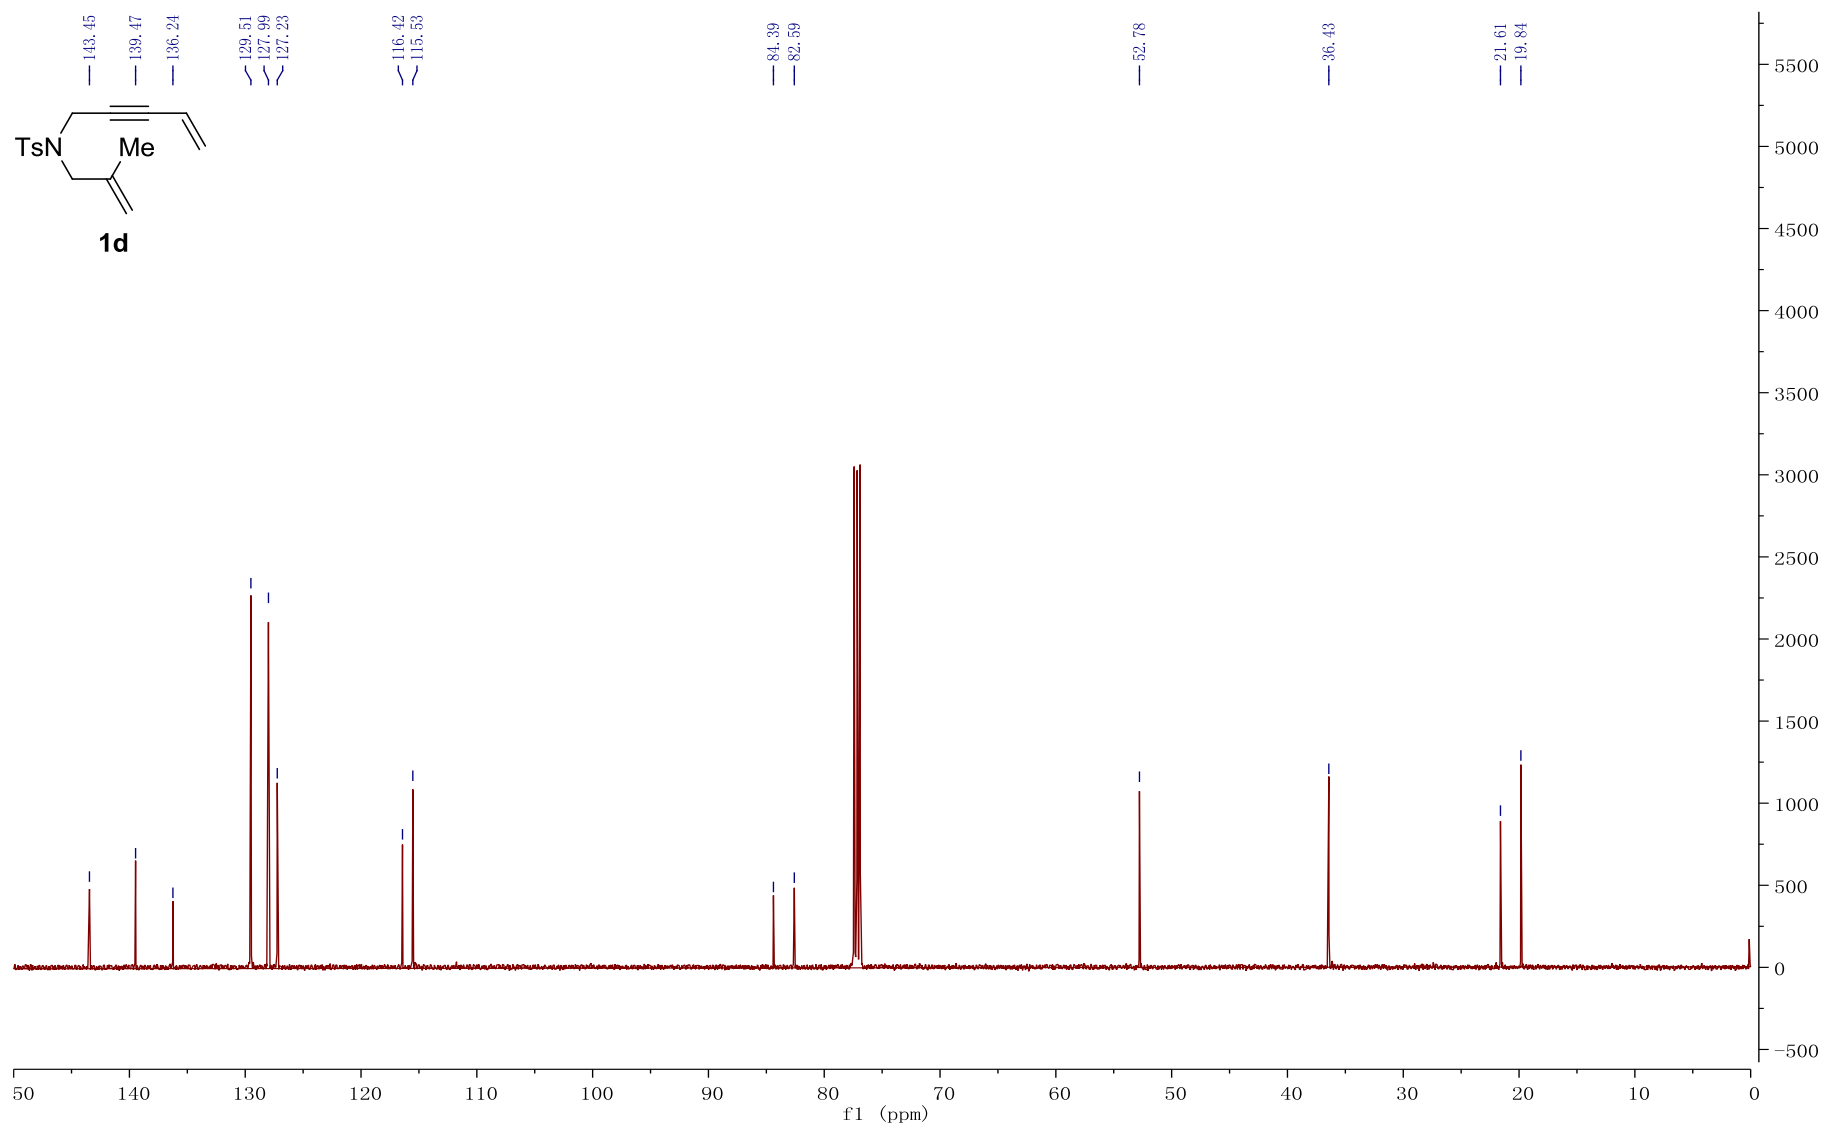

S53

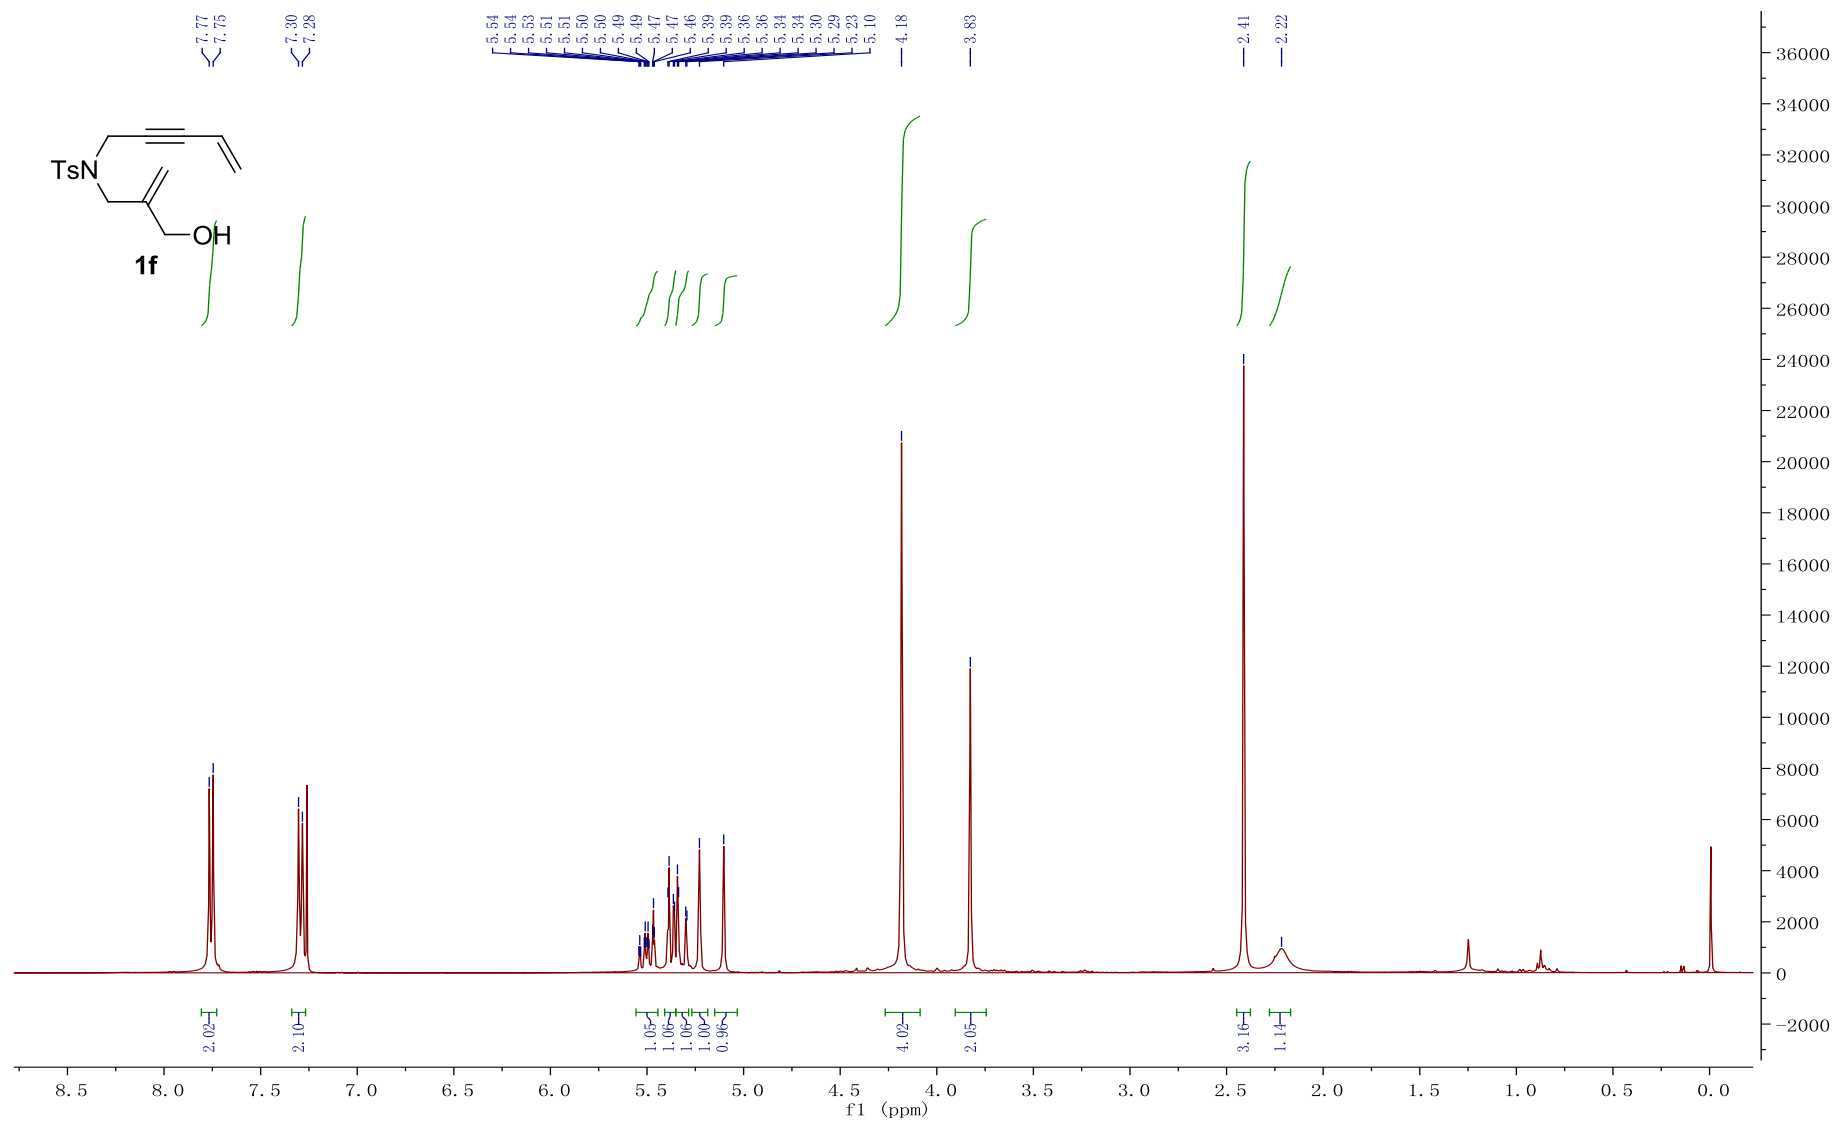

S54

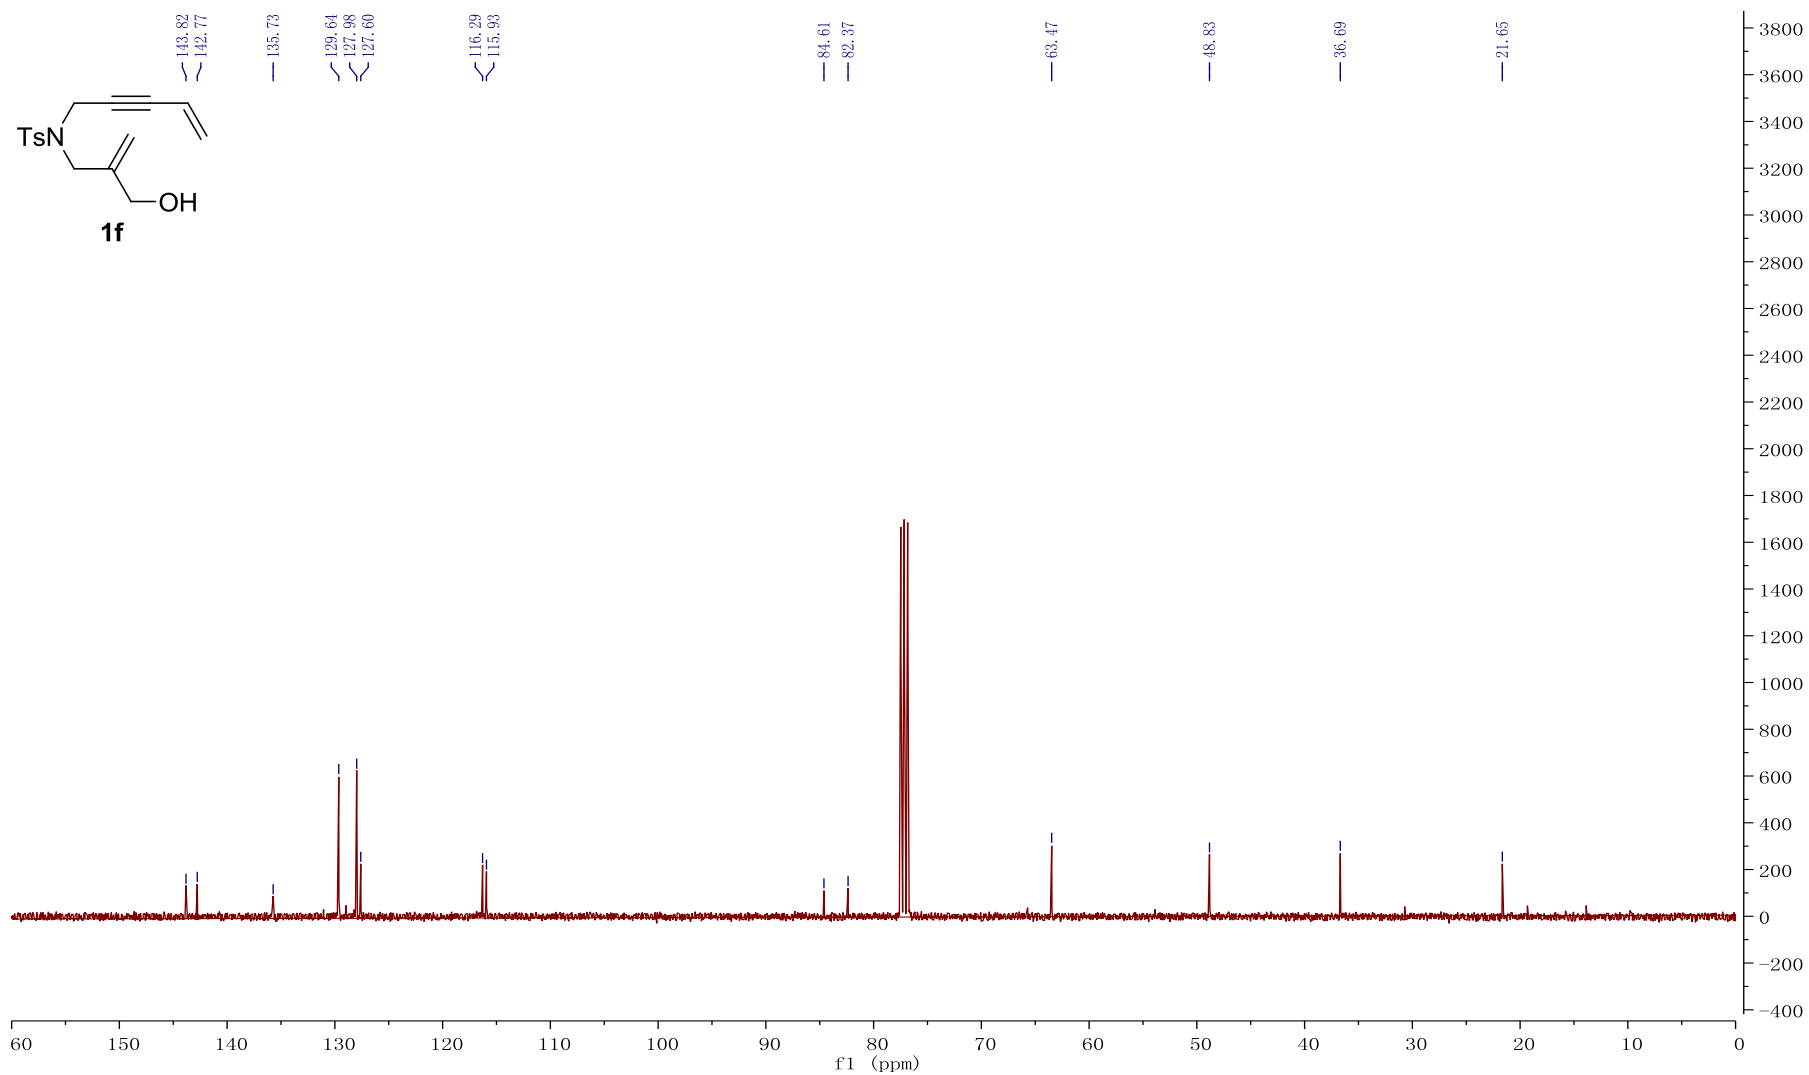

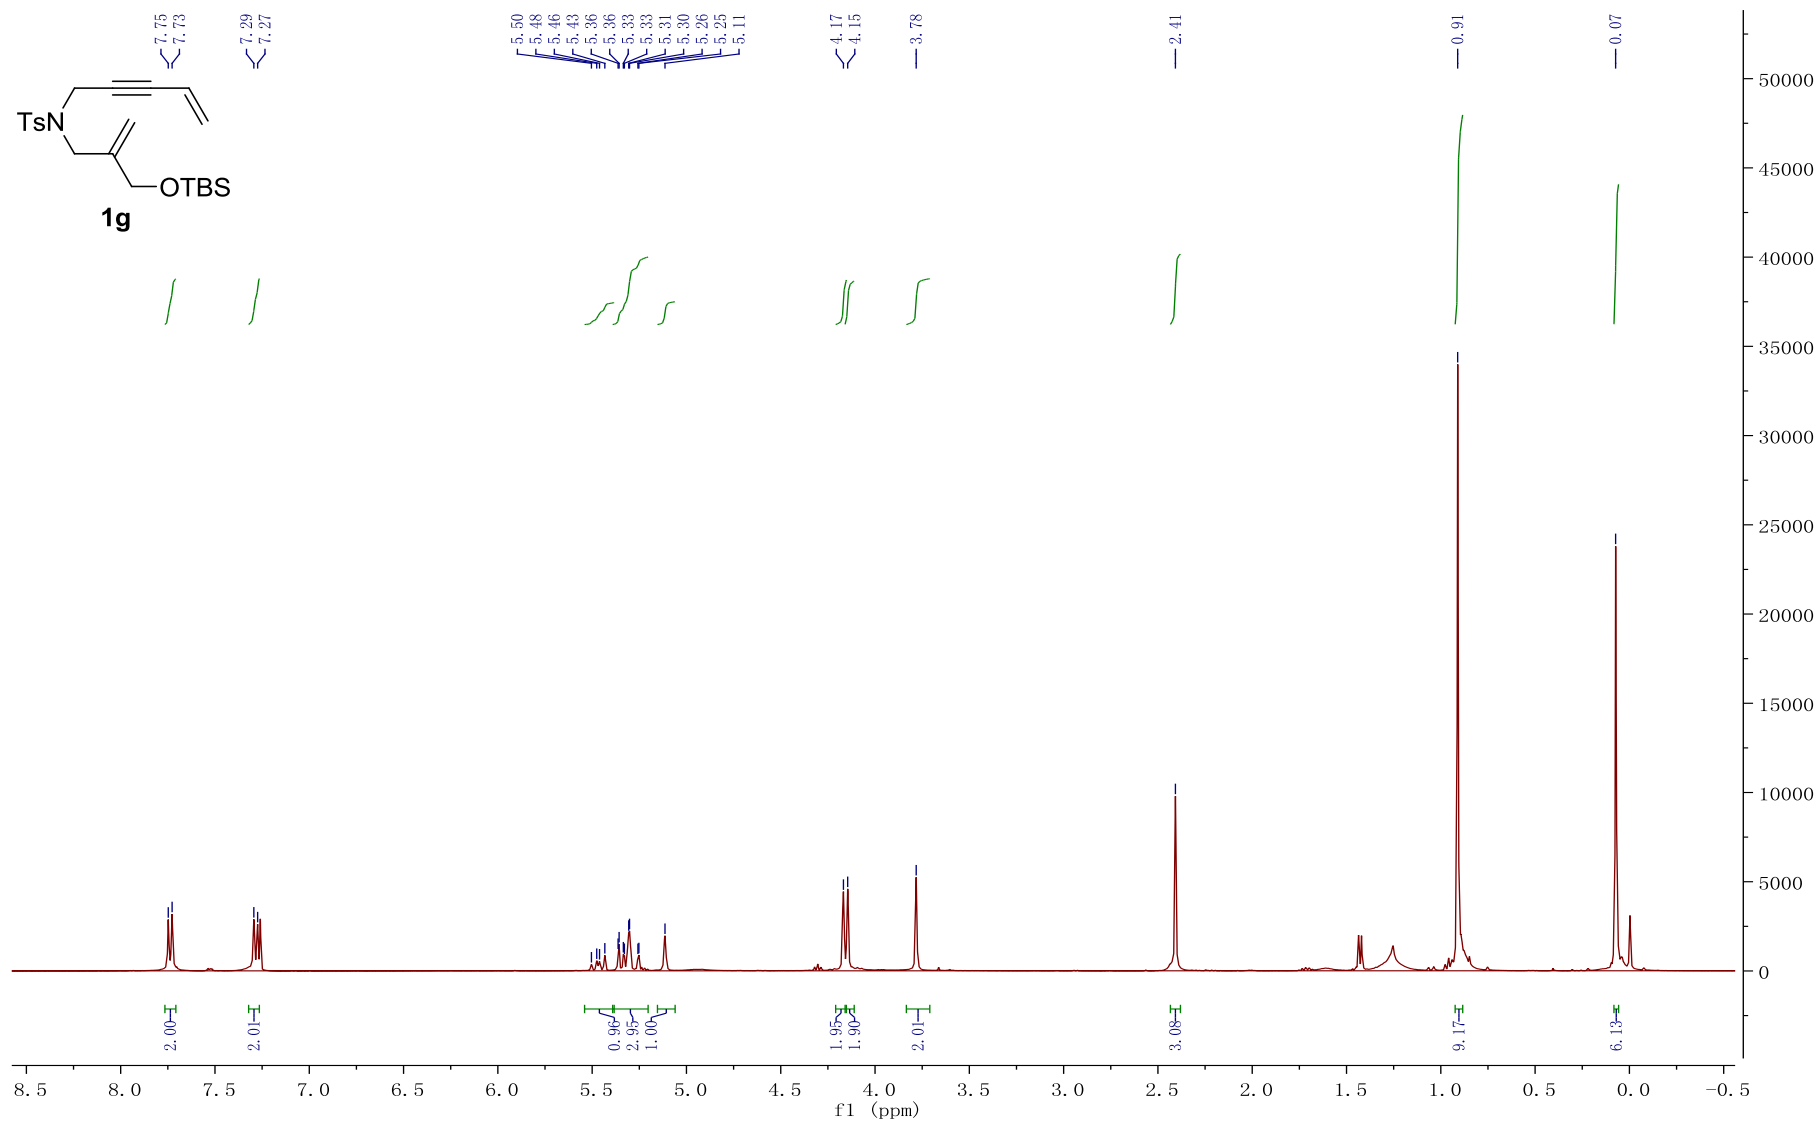

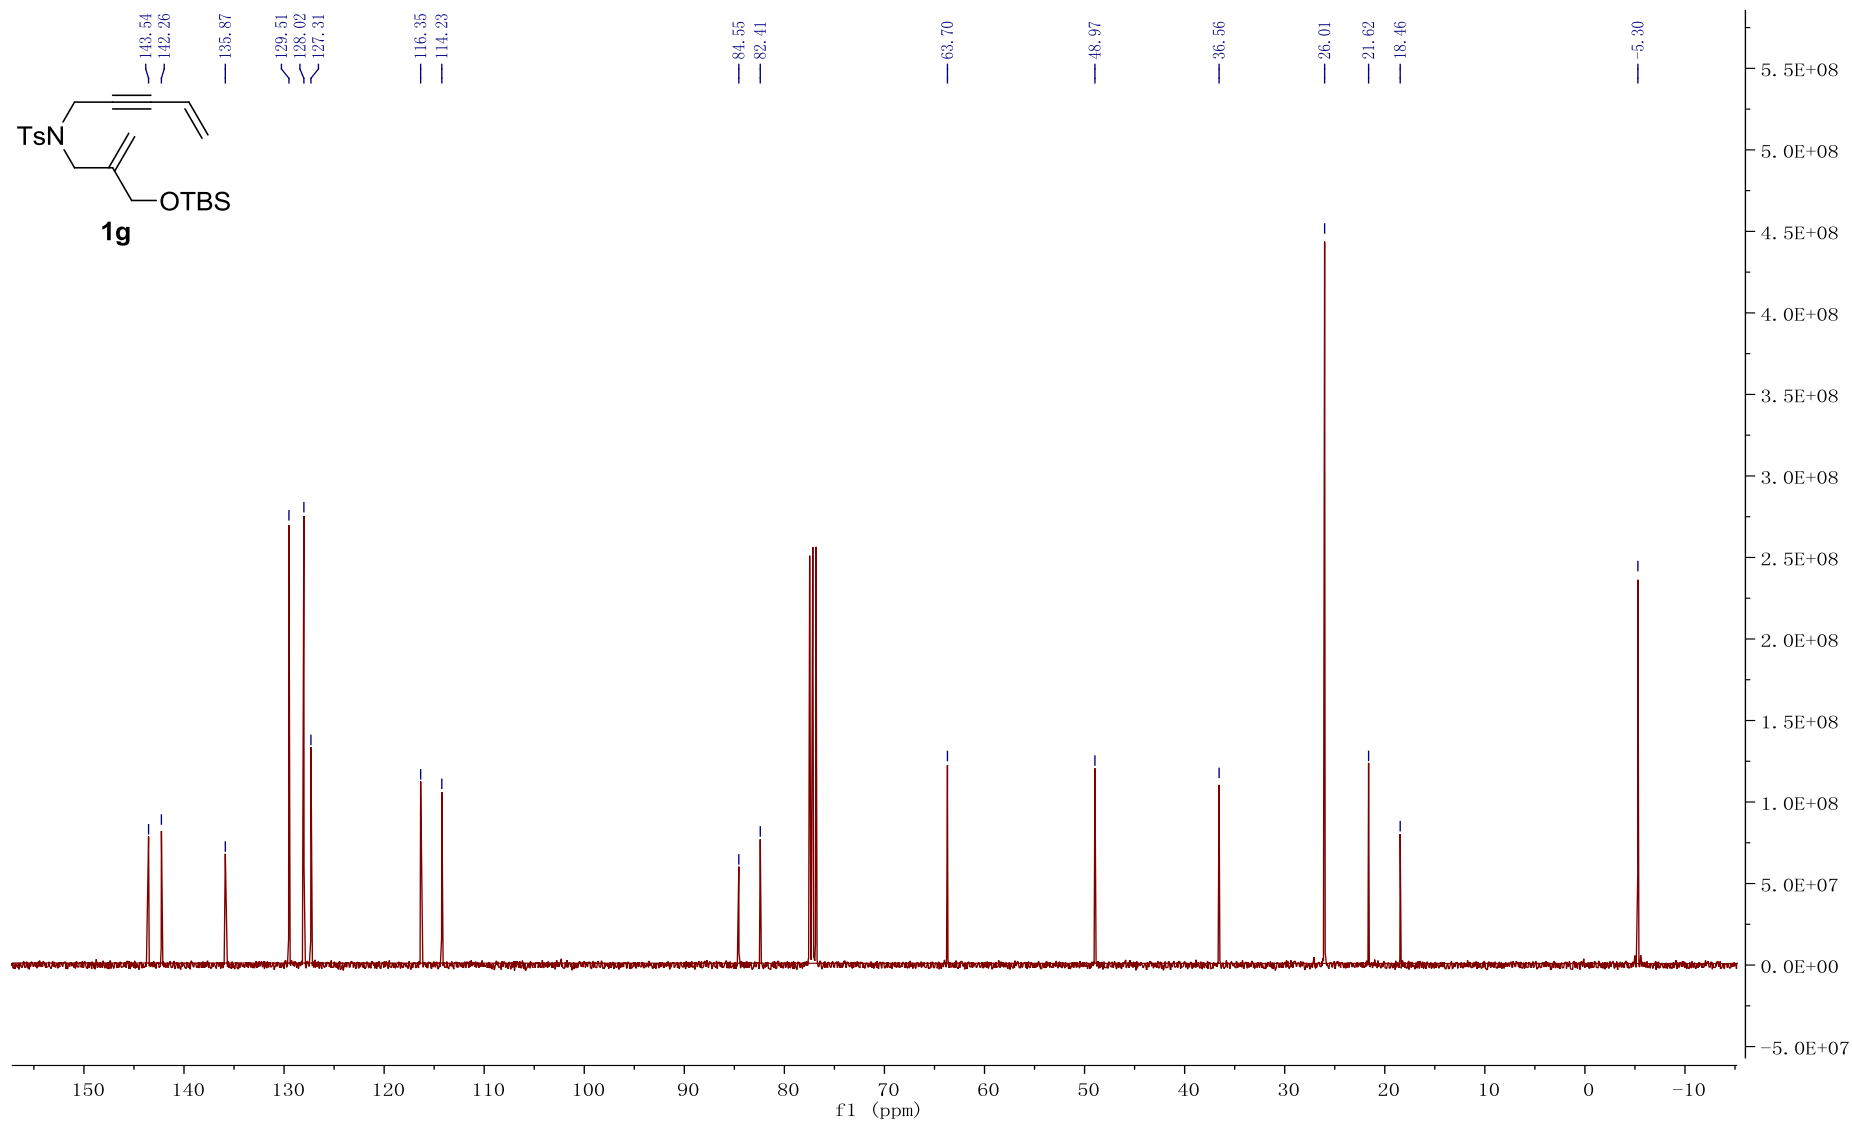

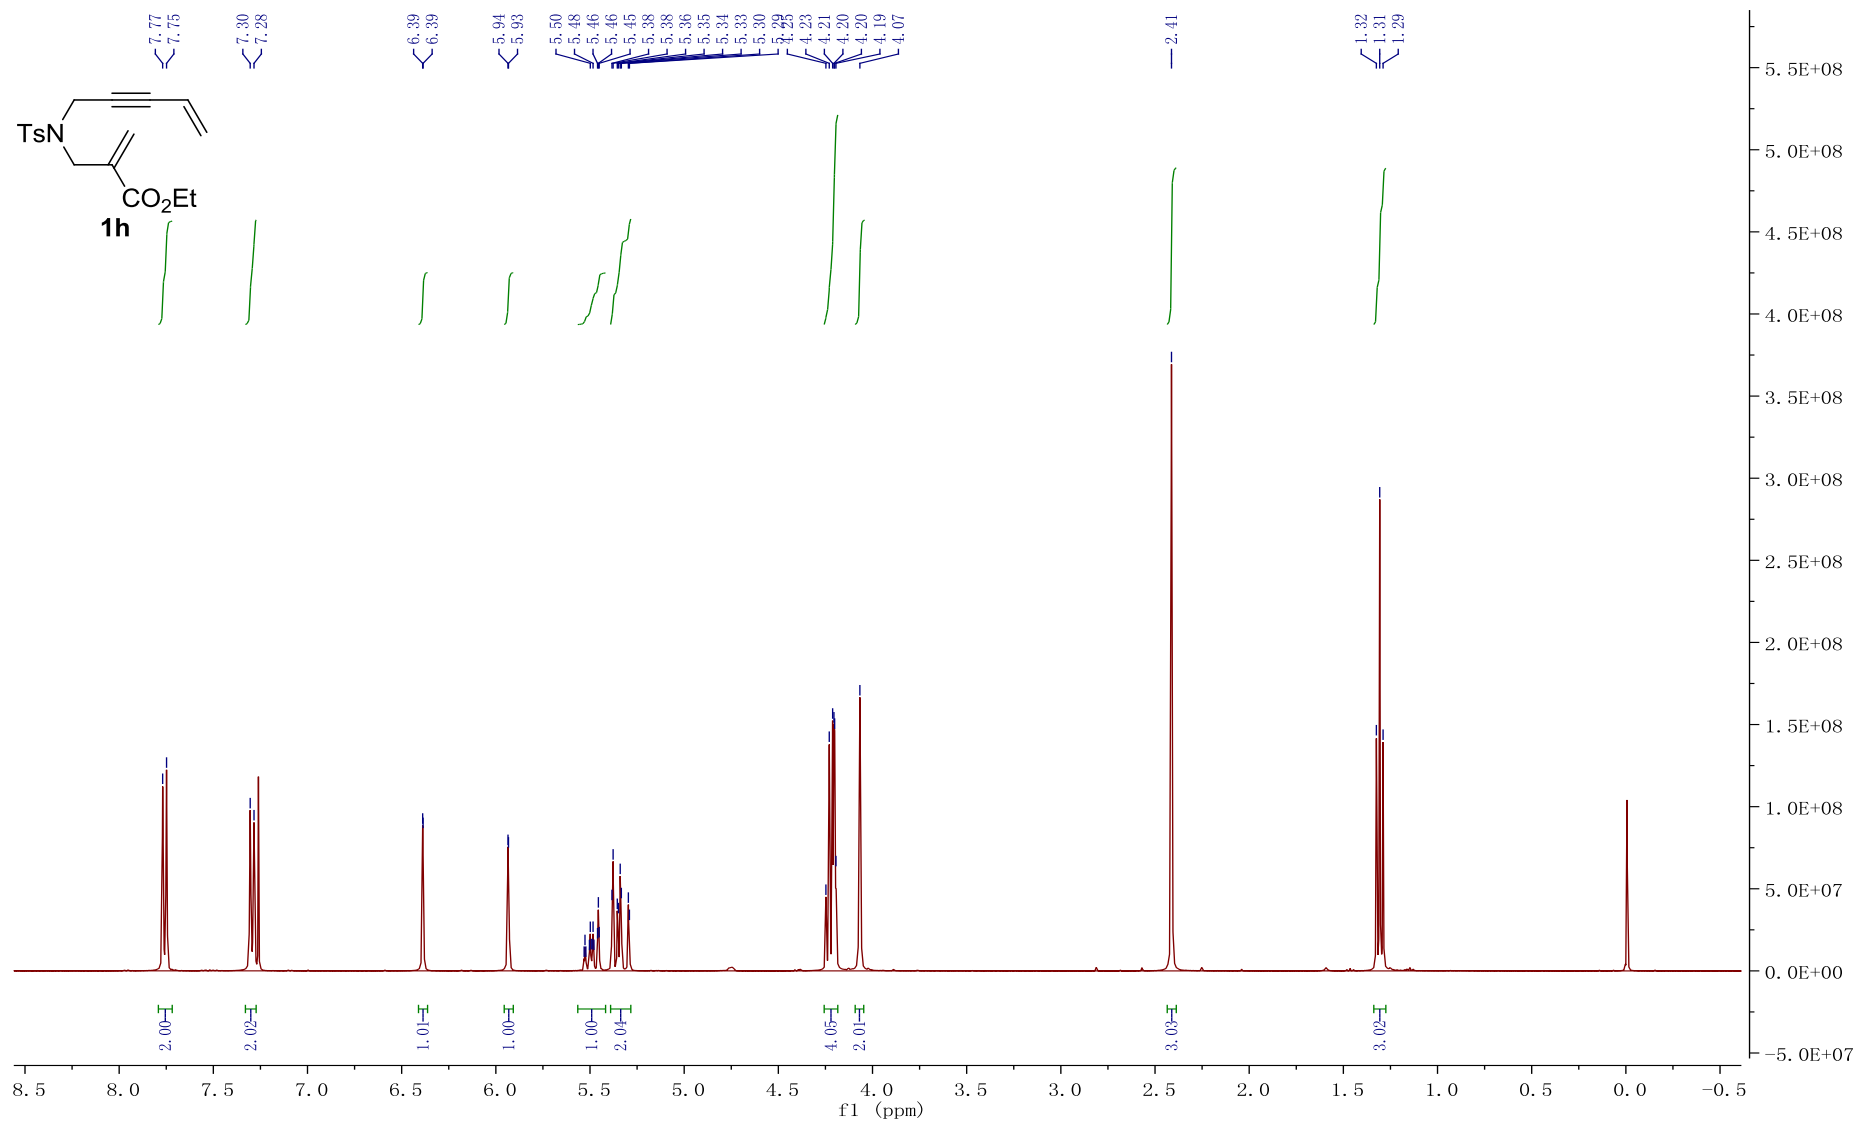

S58

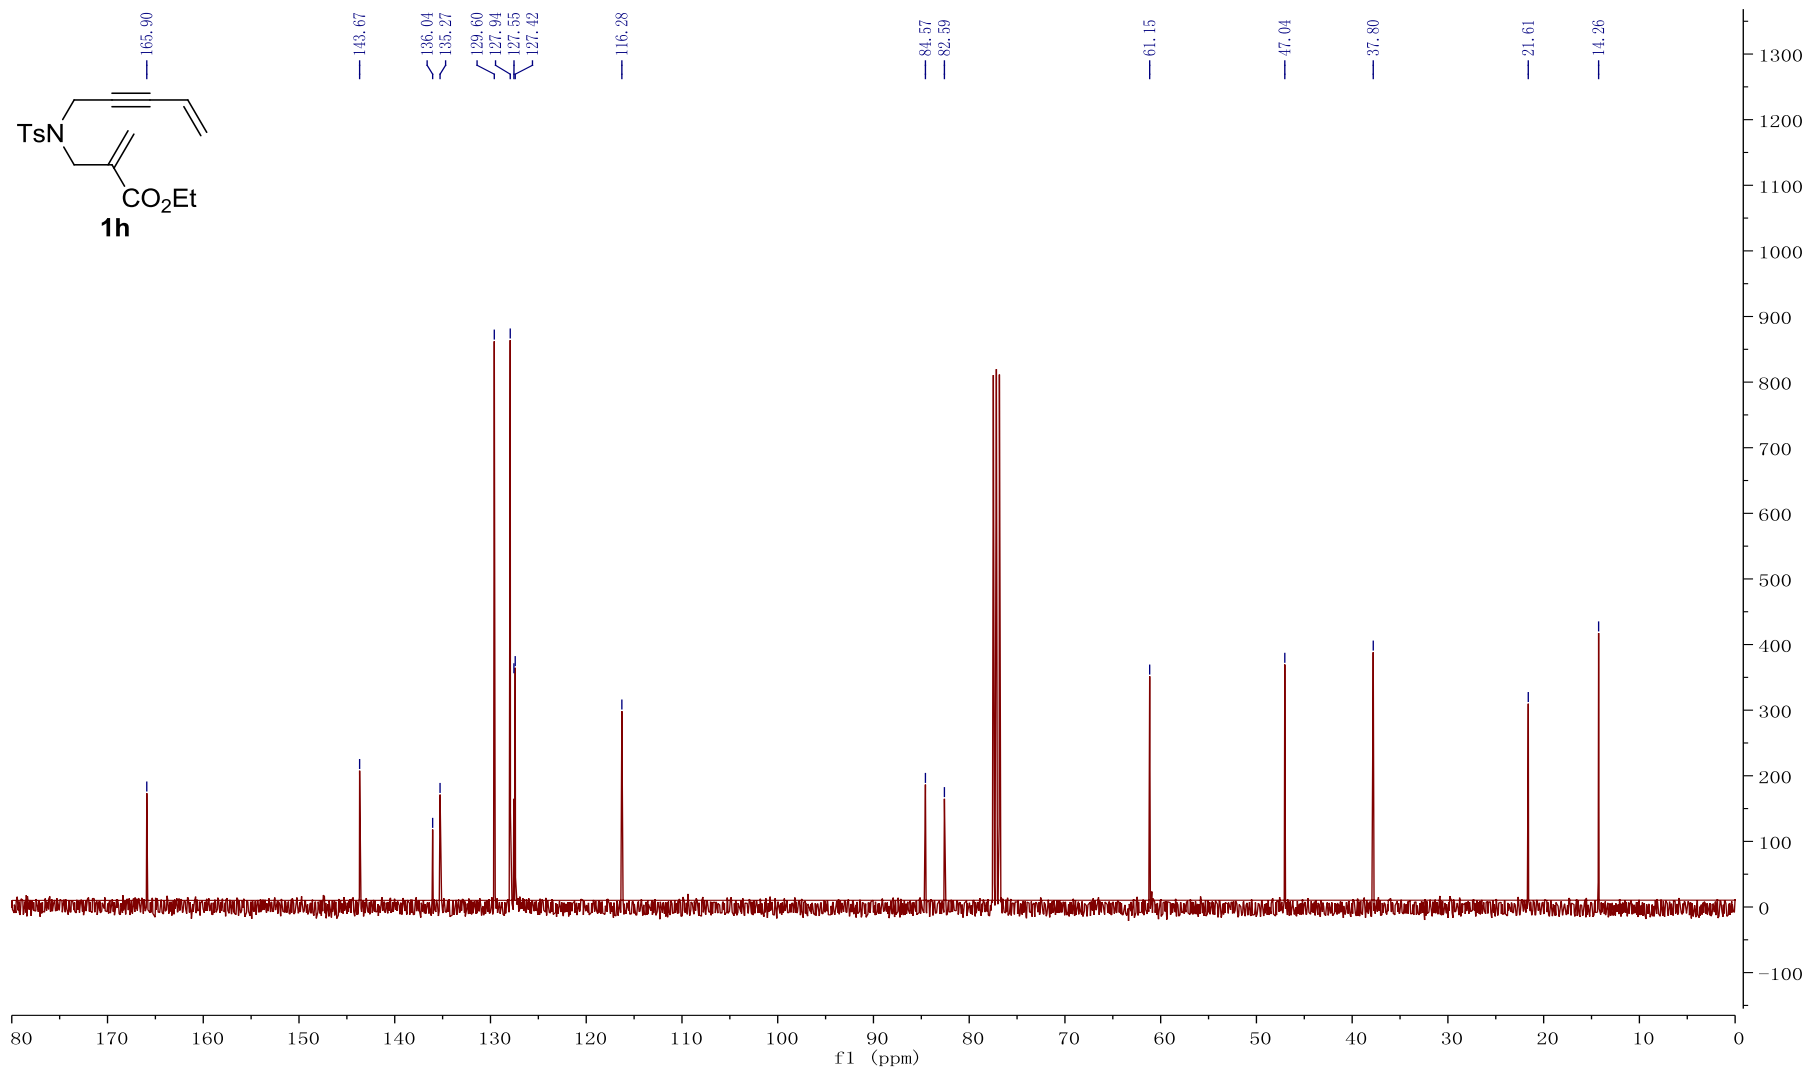

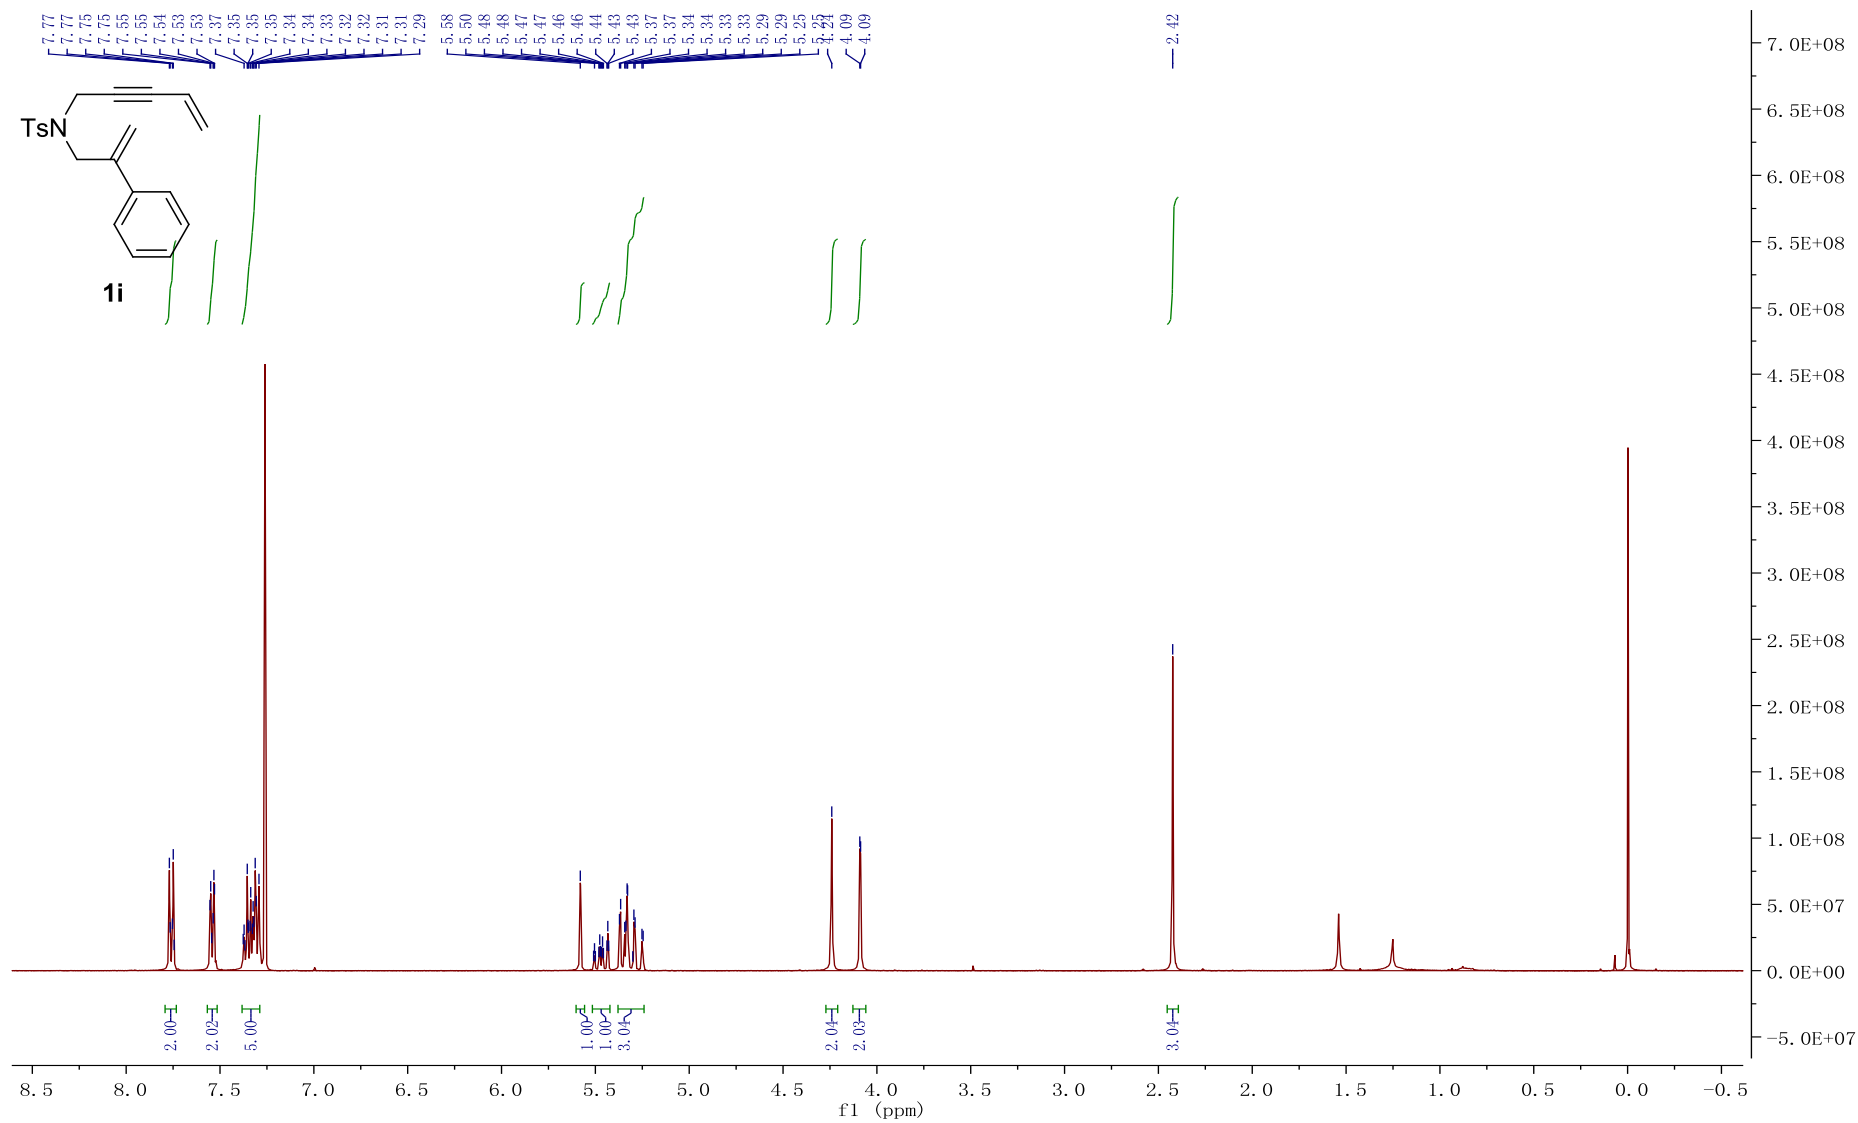

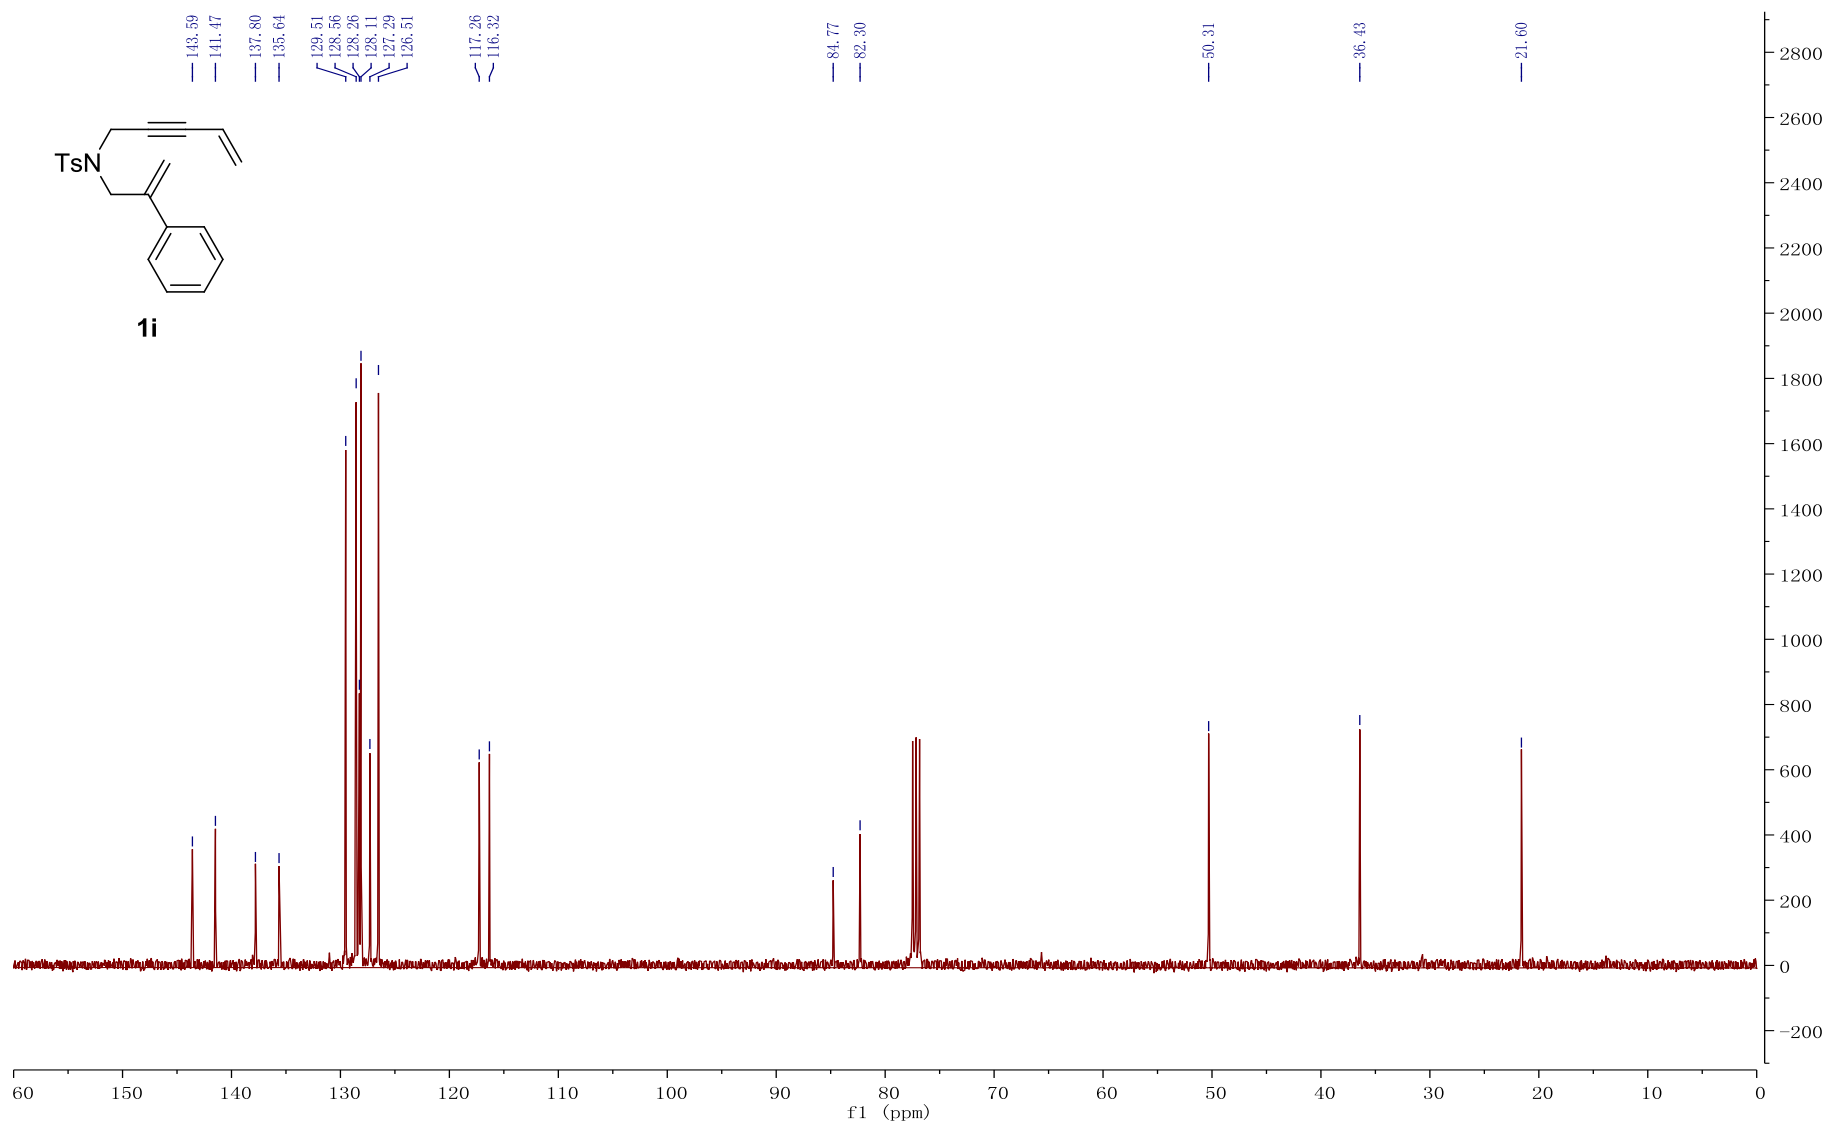



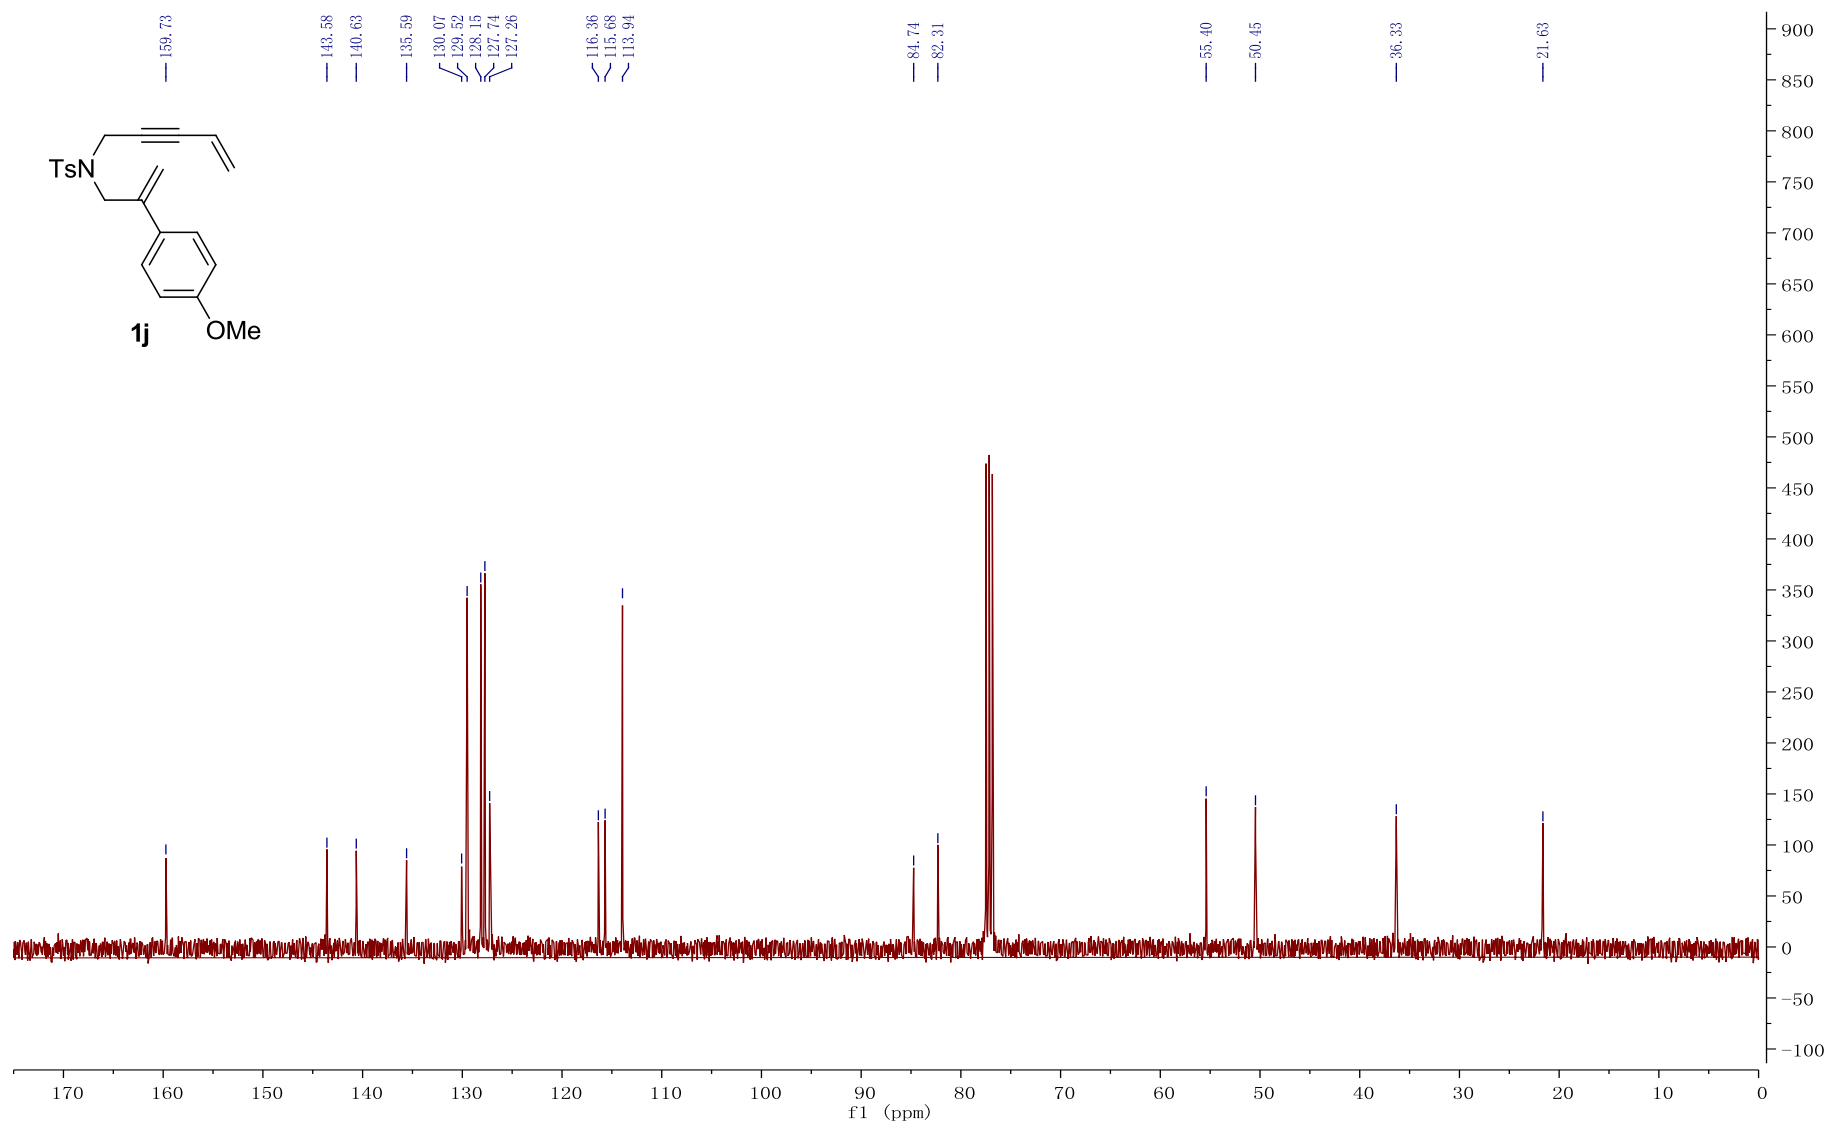

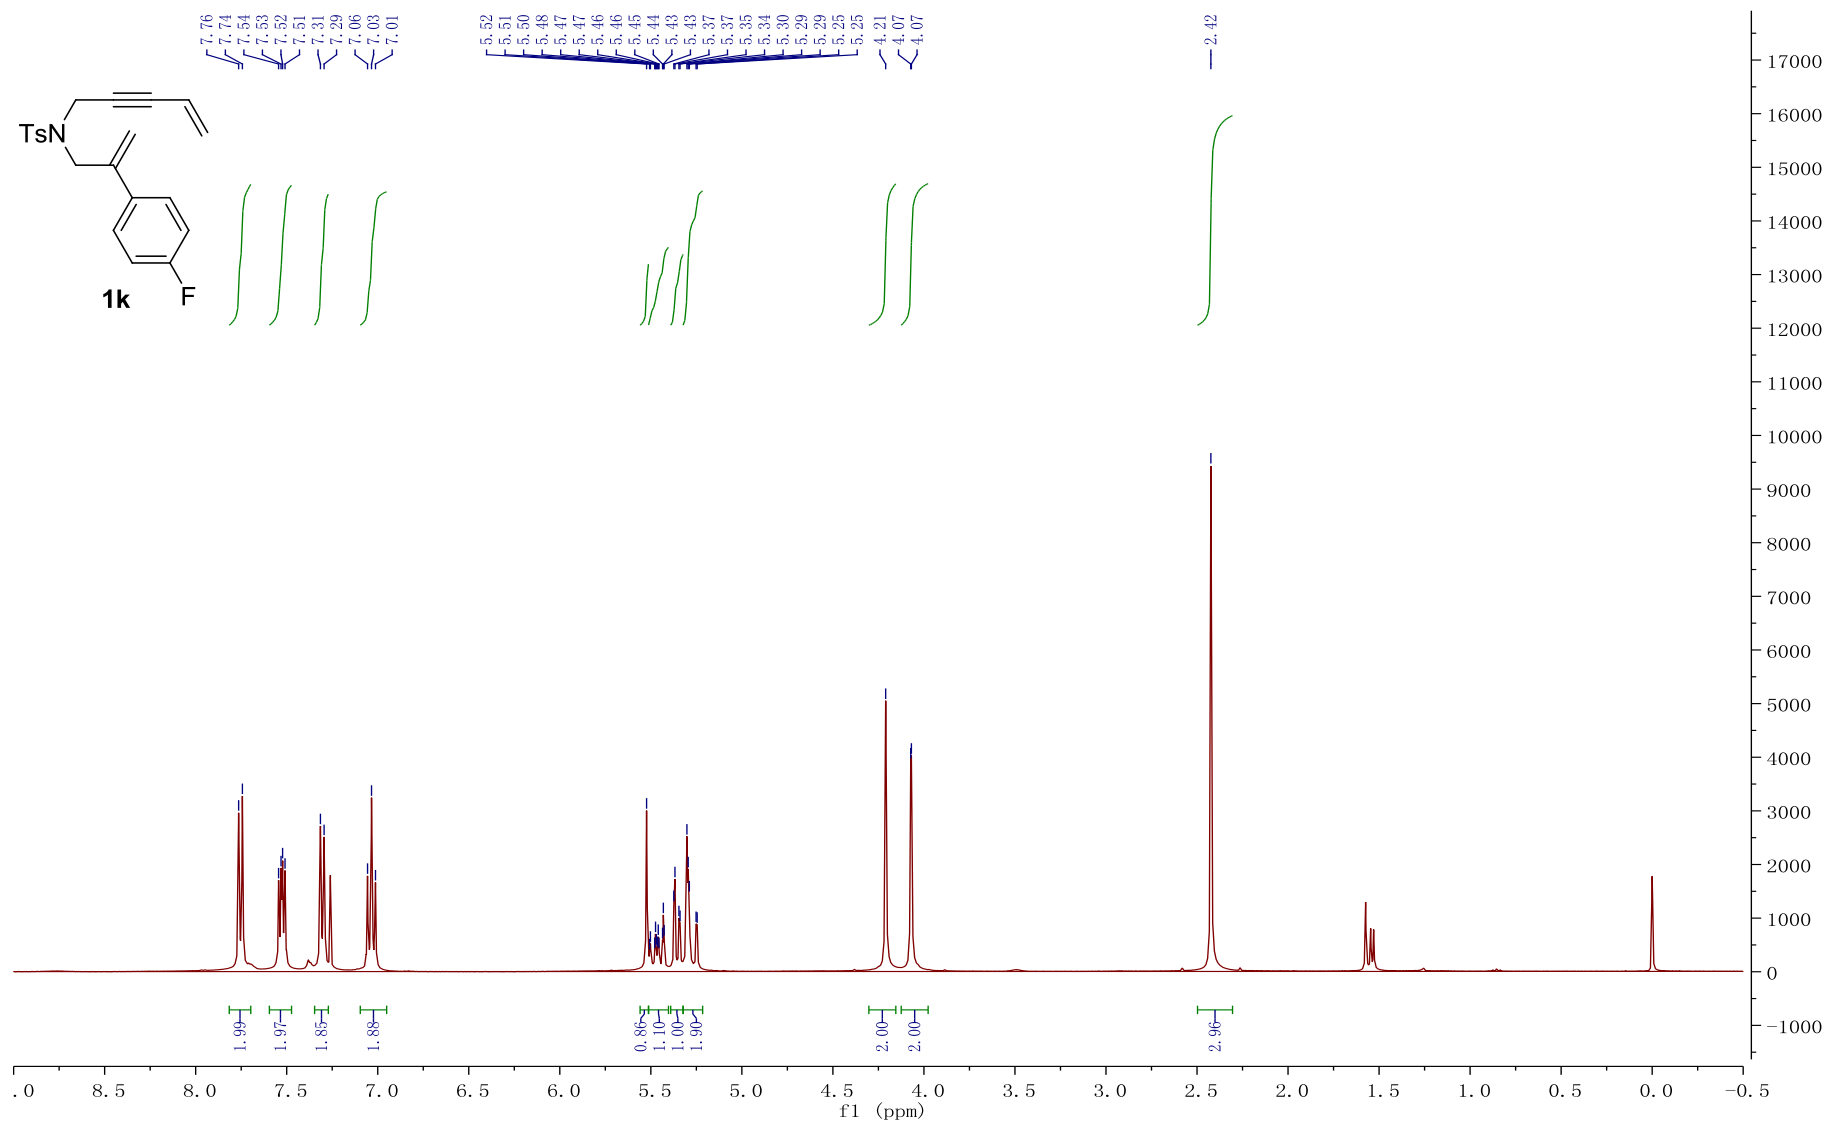

S64

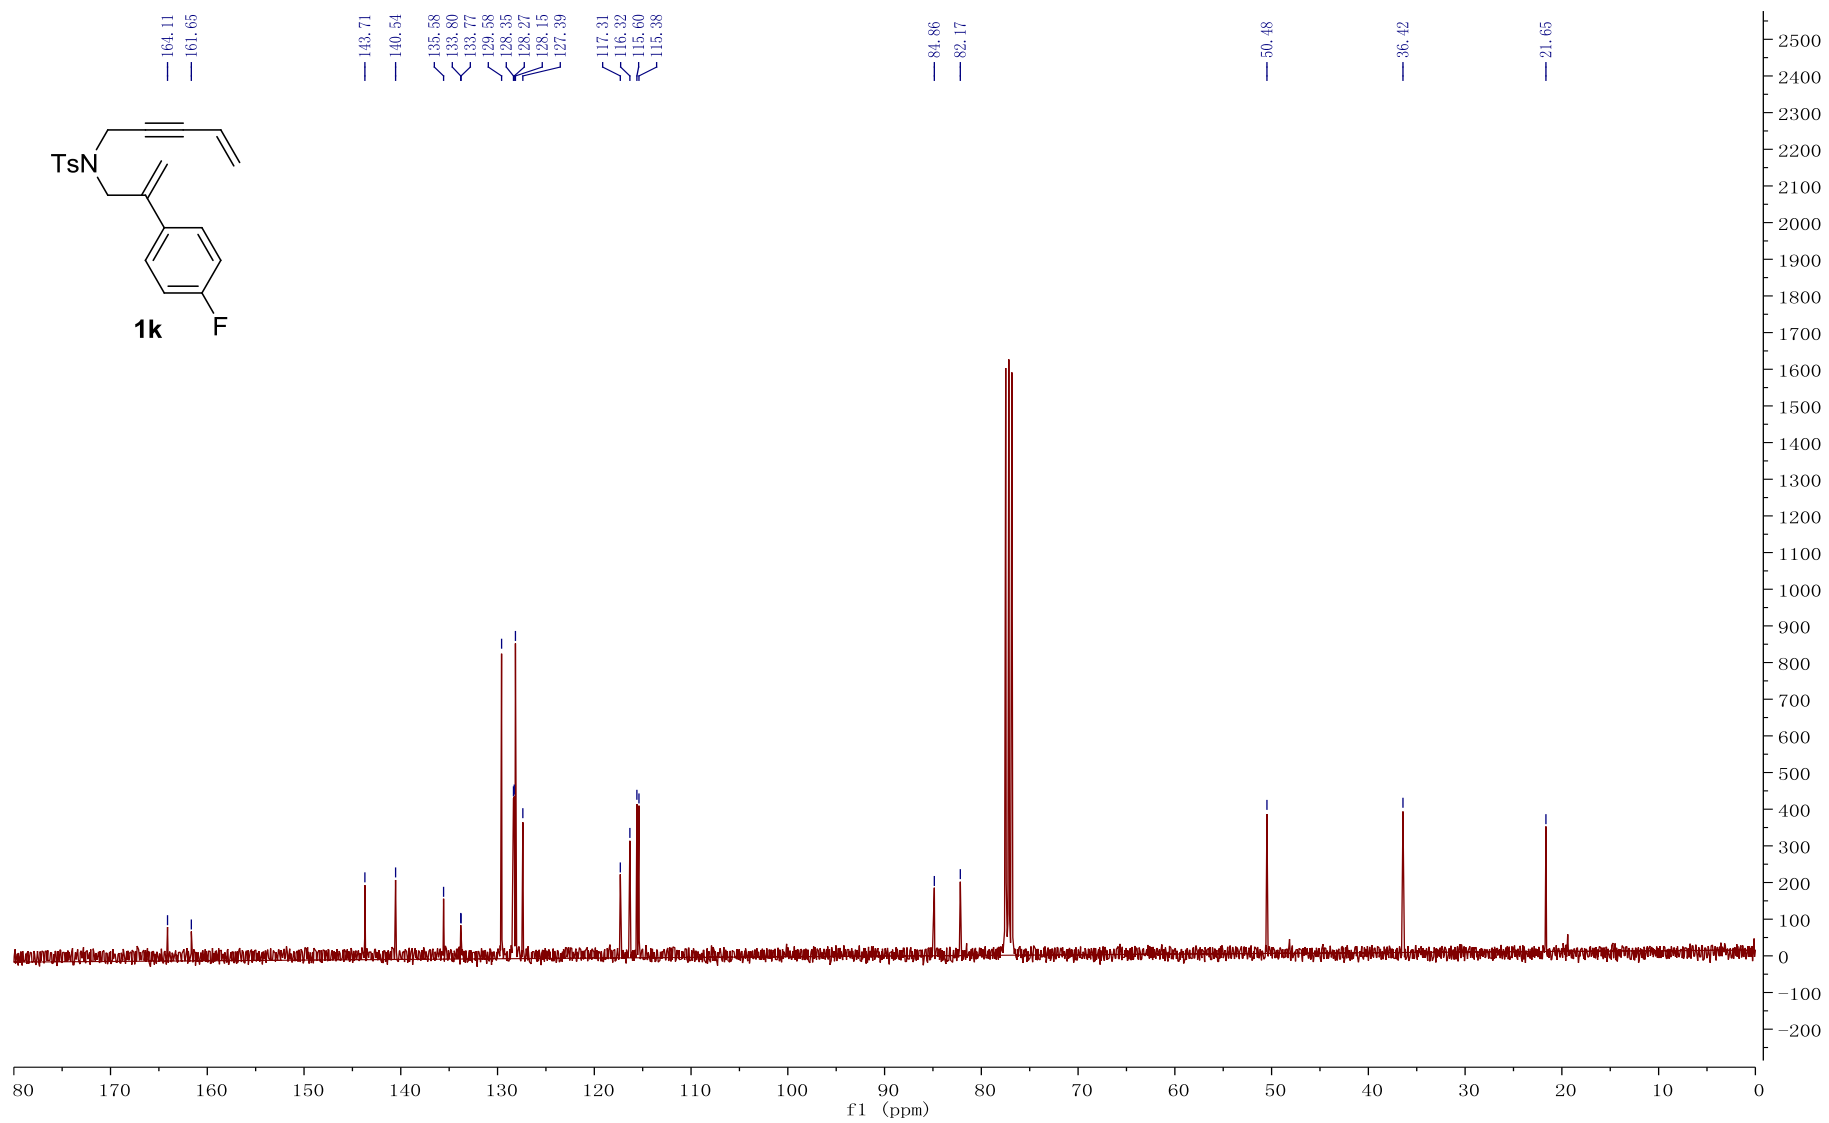

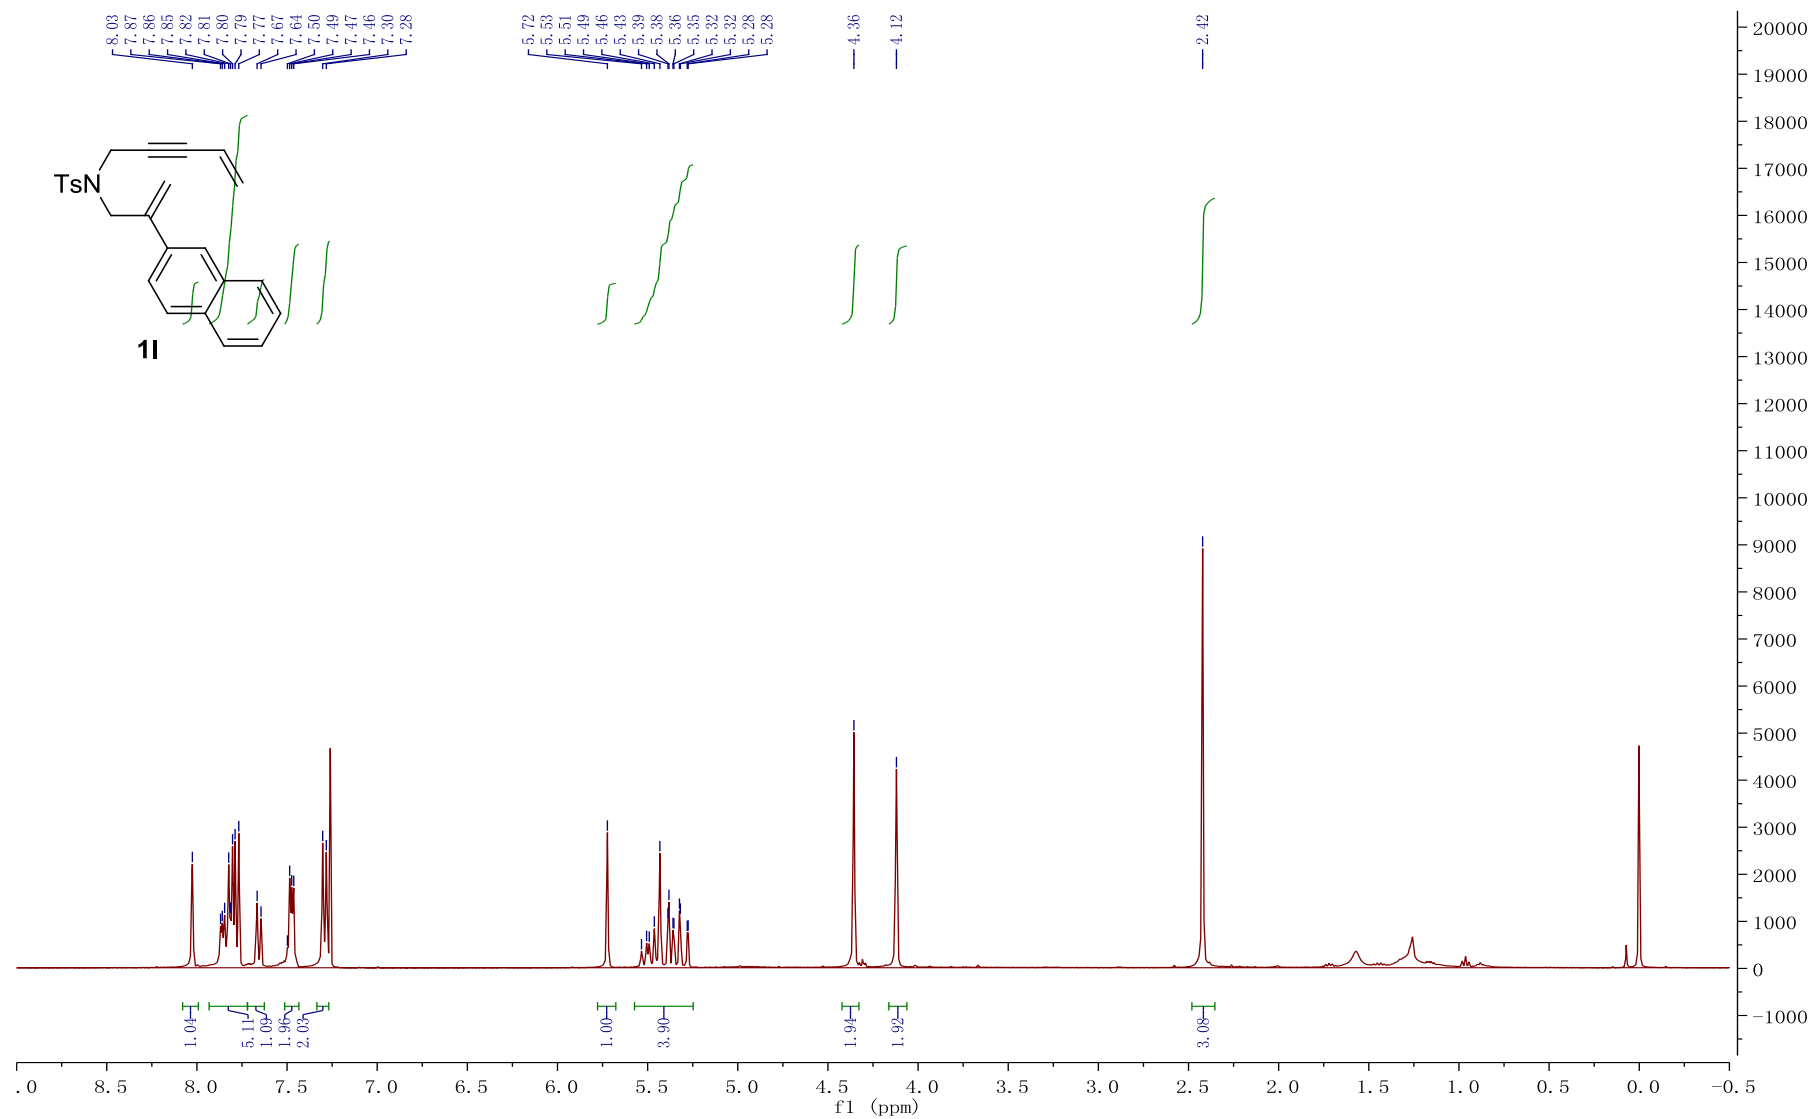

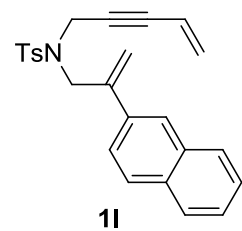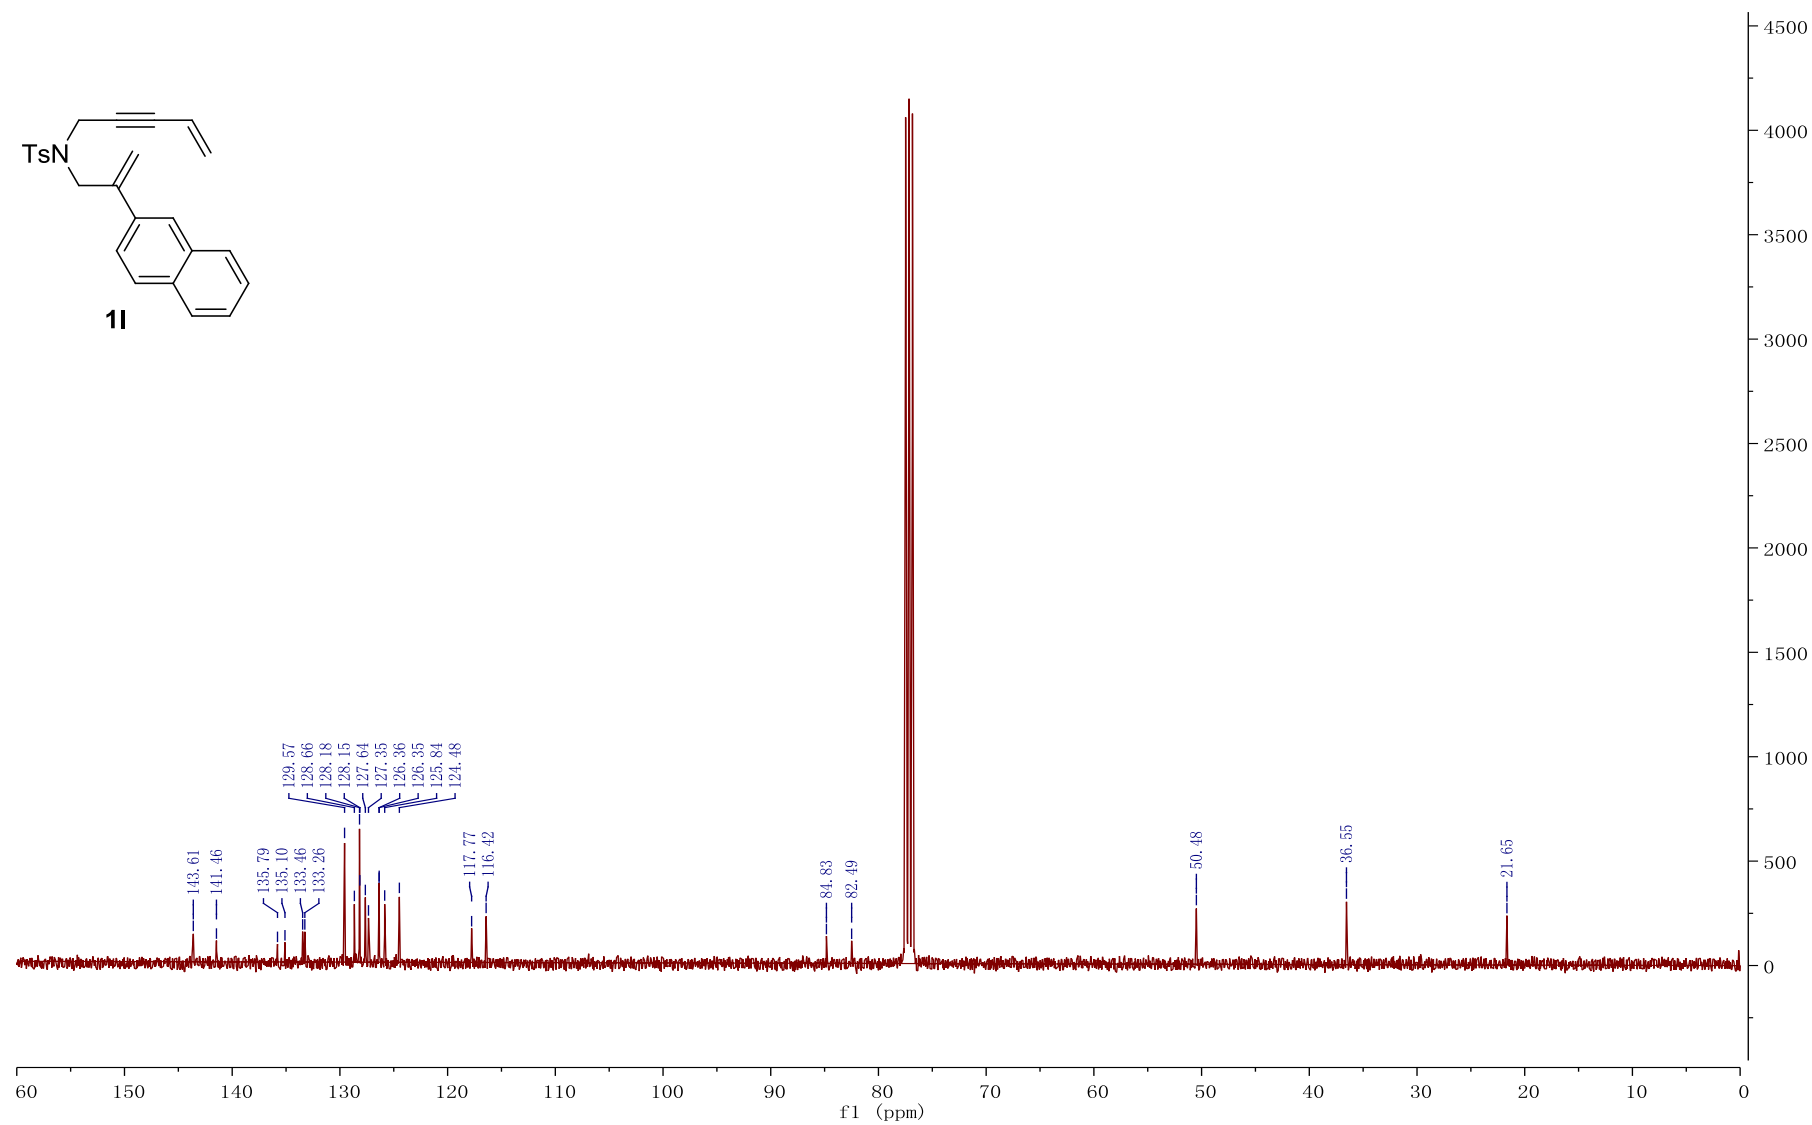

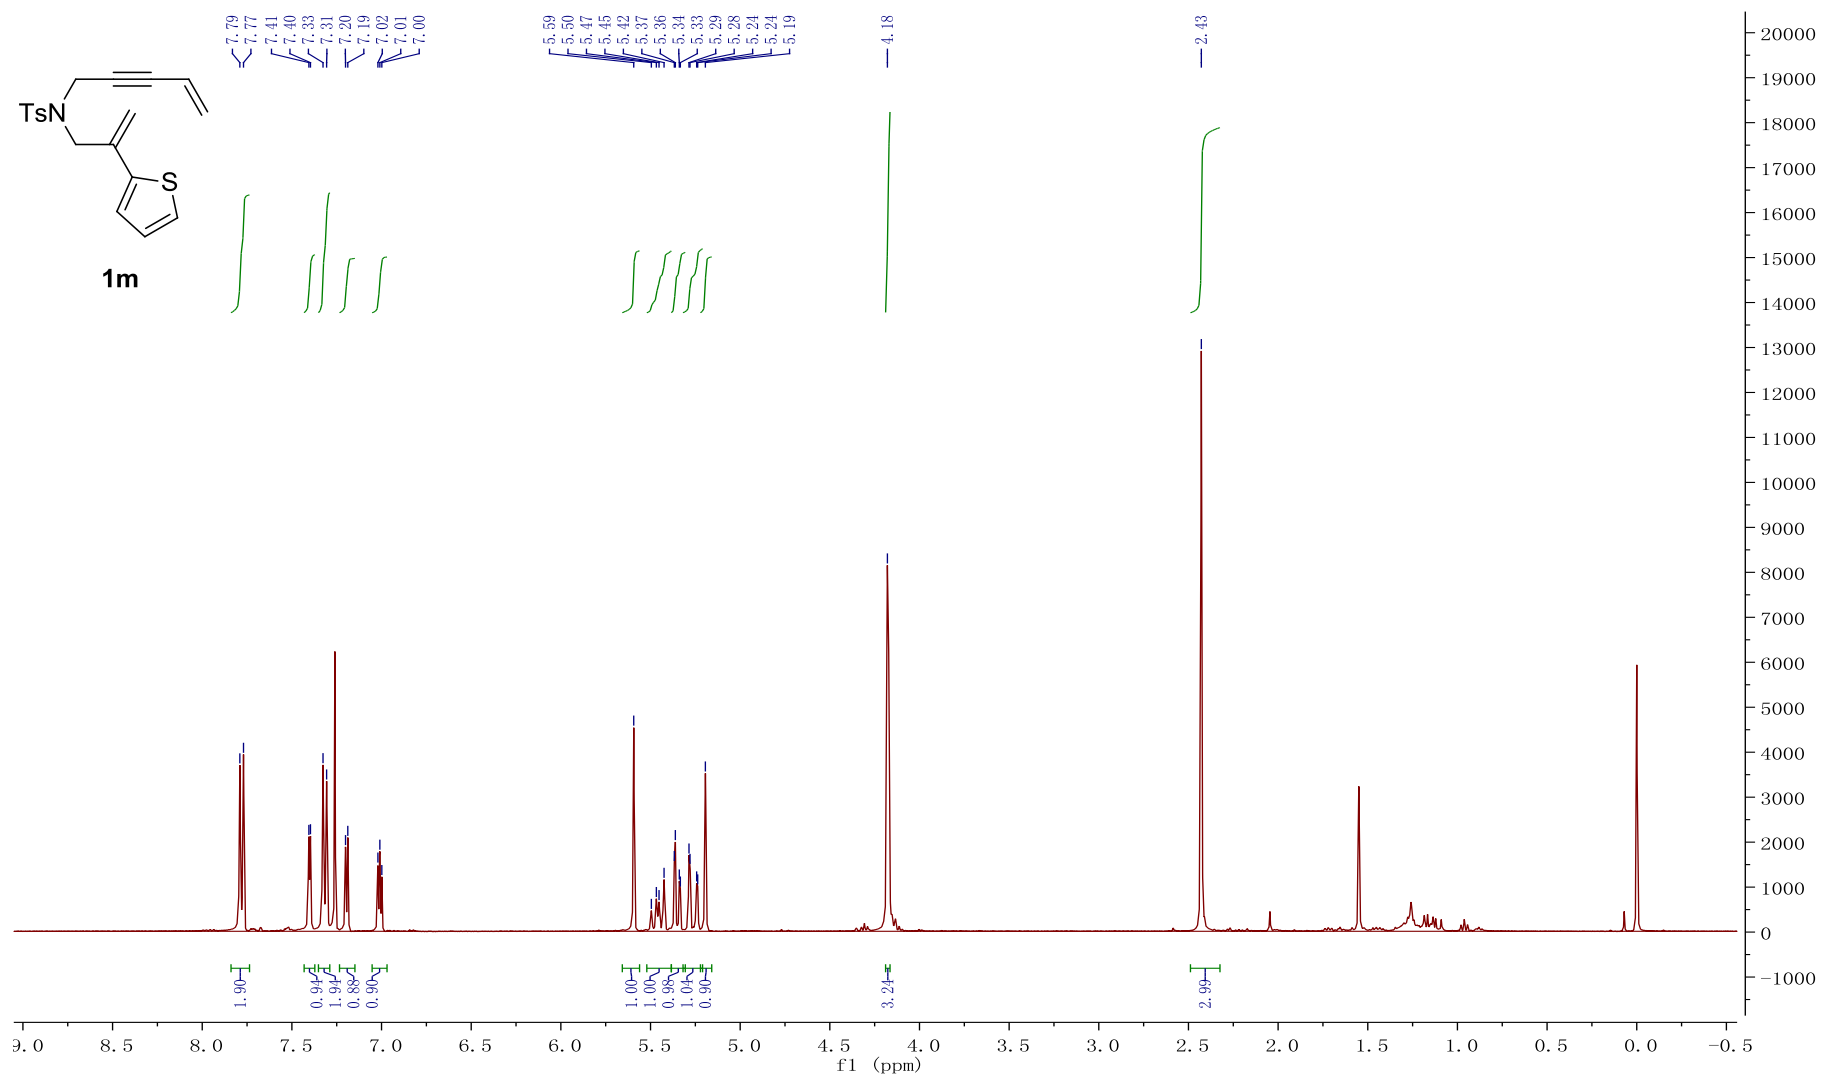

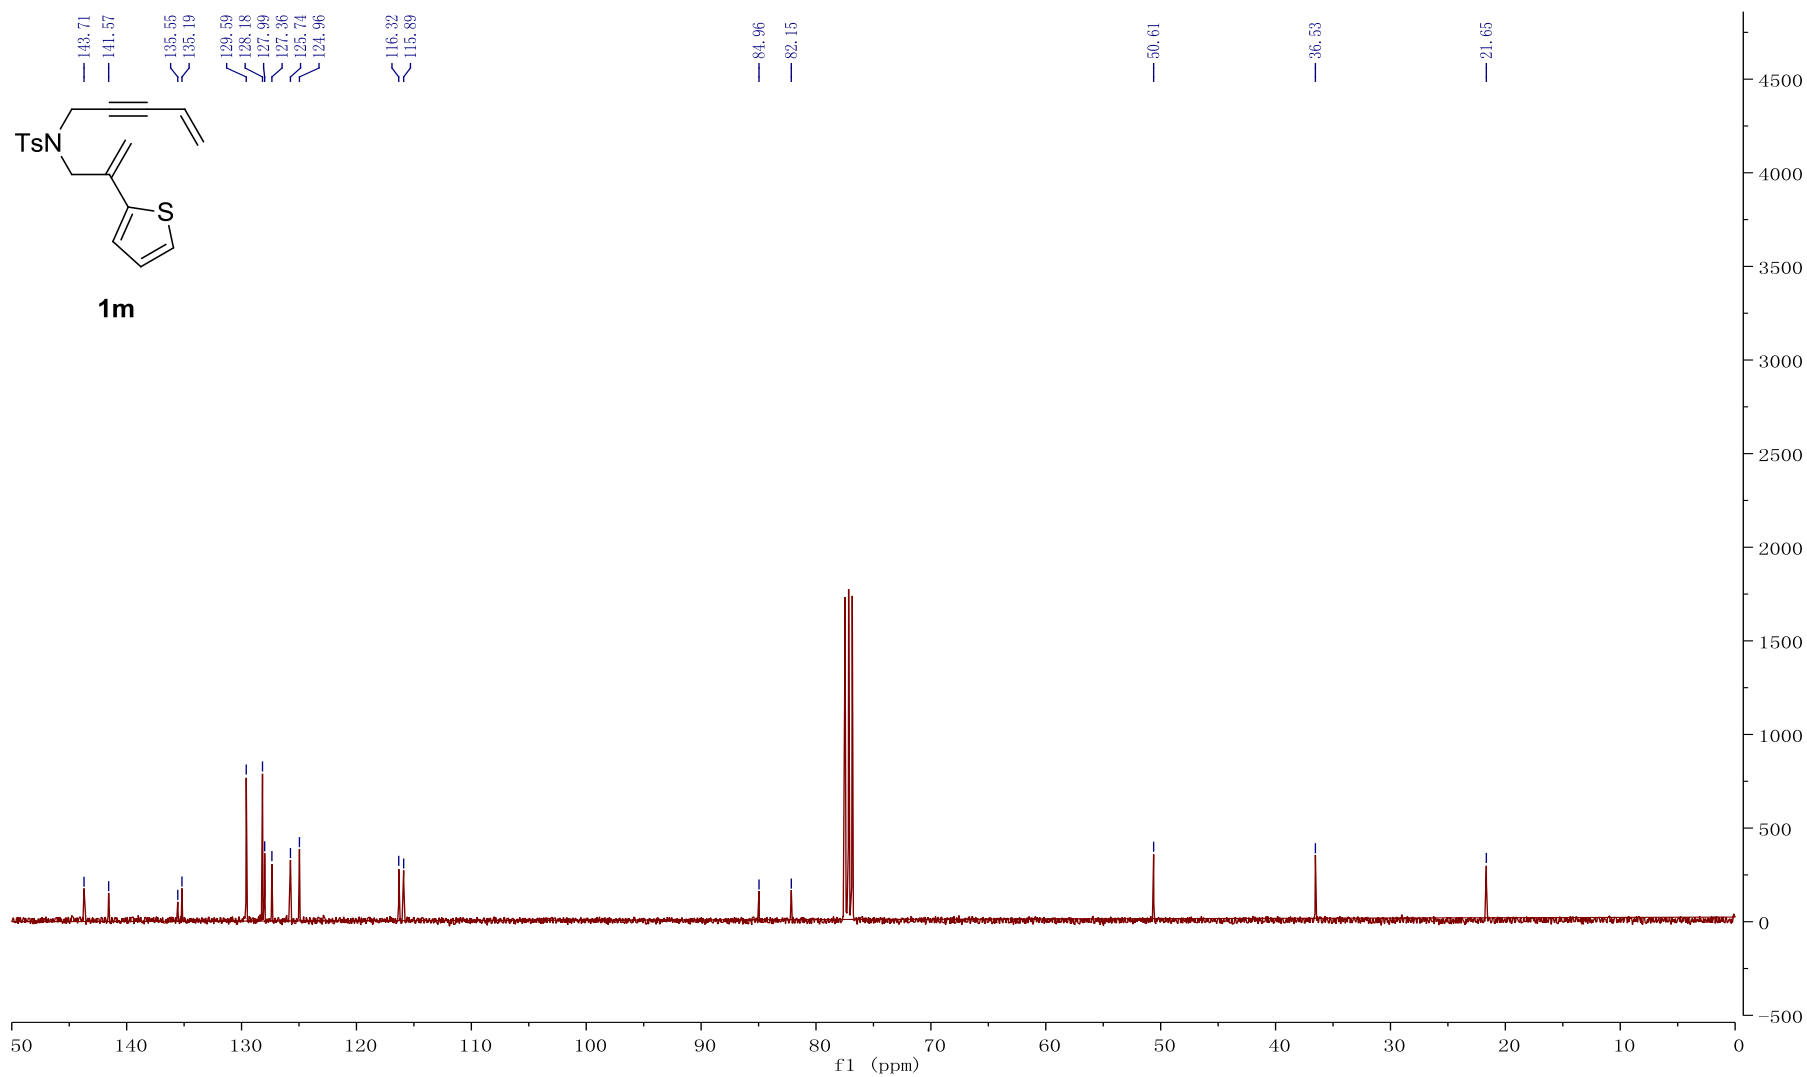

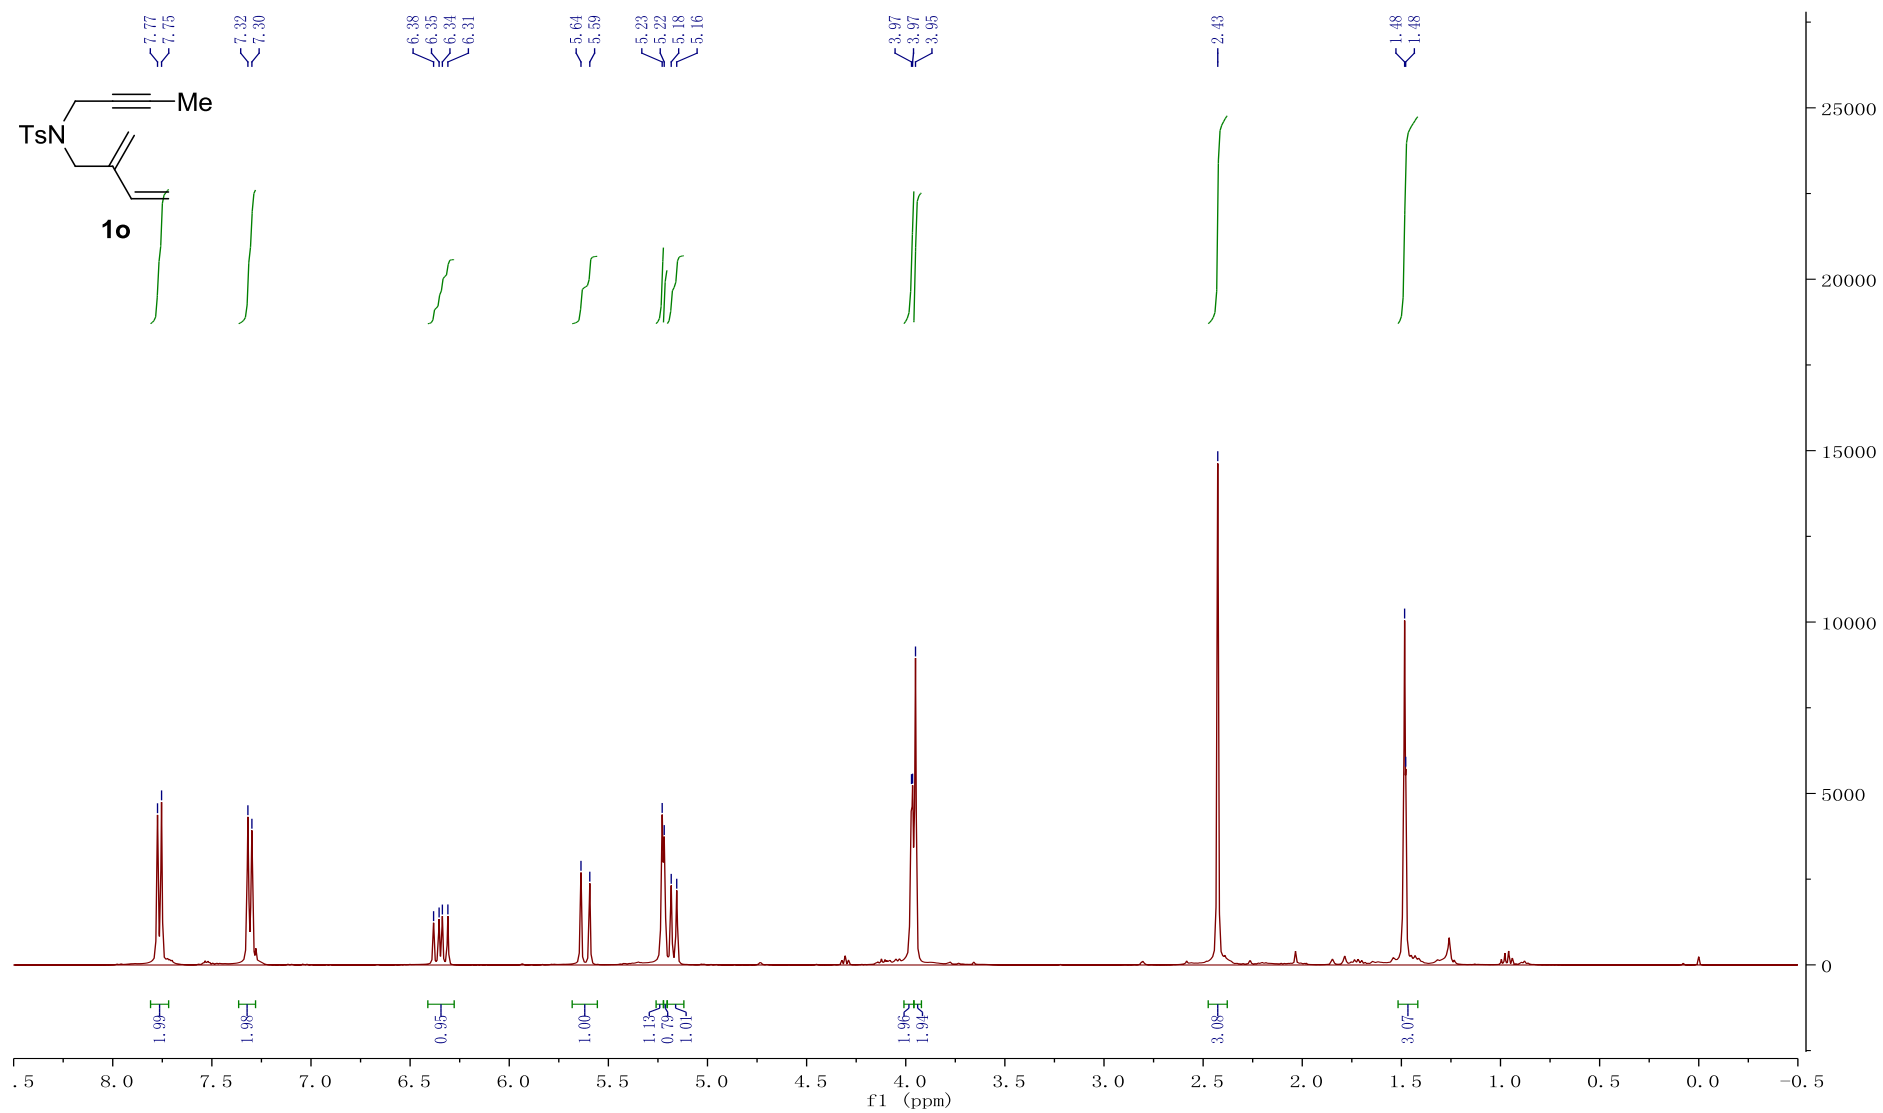

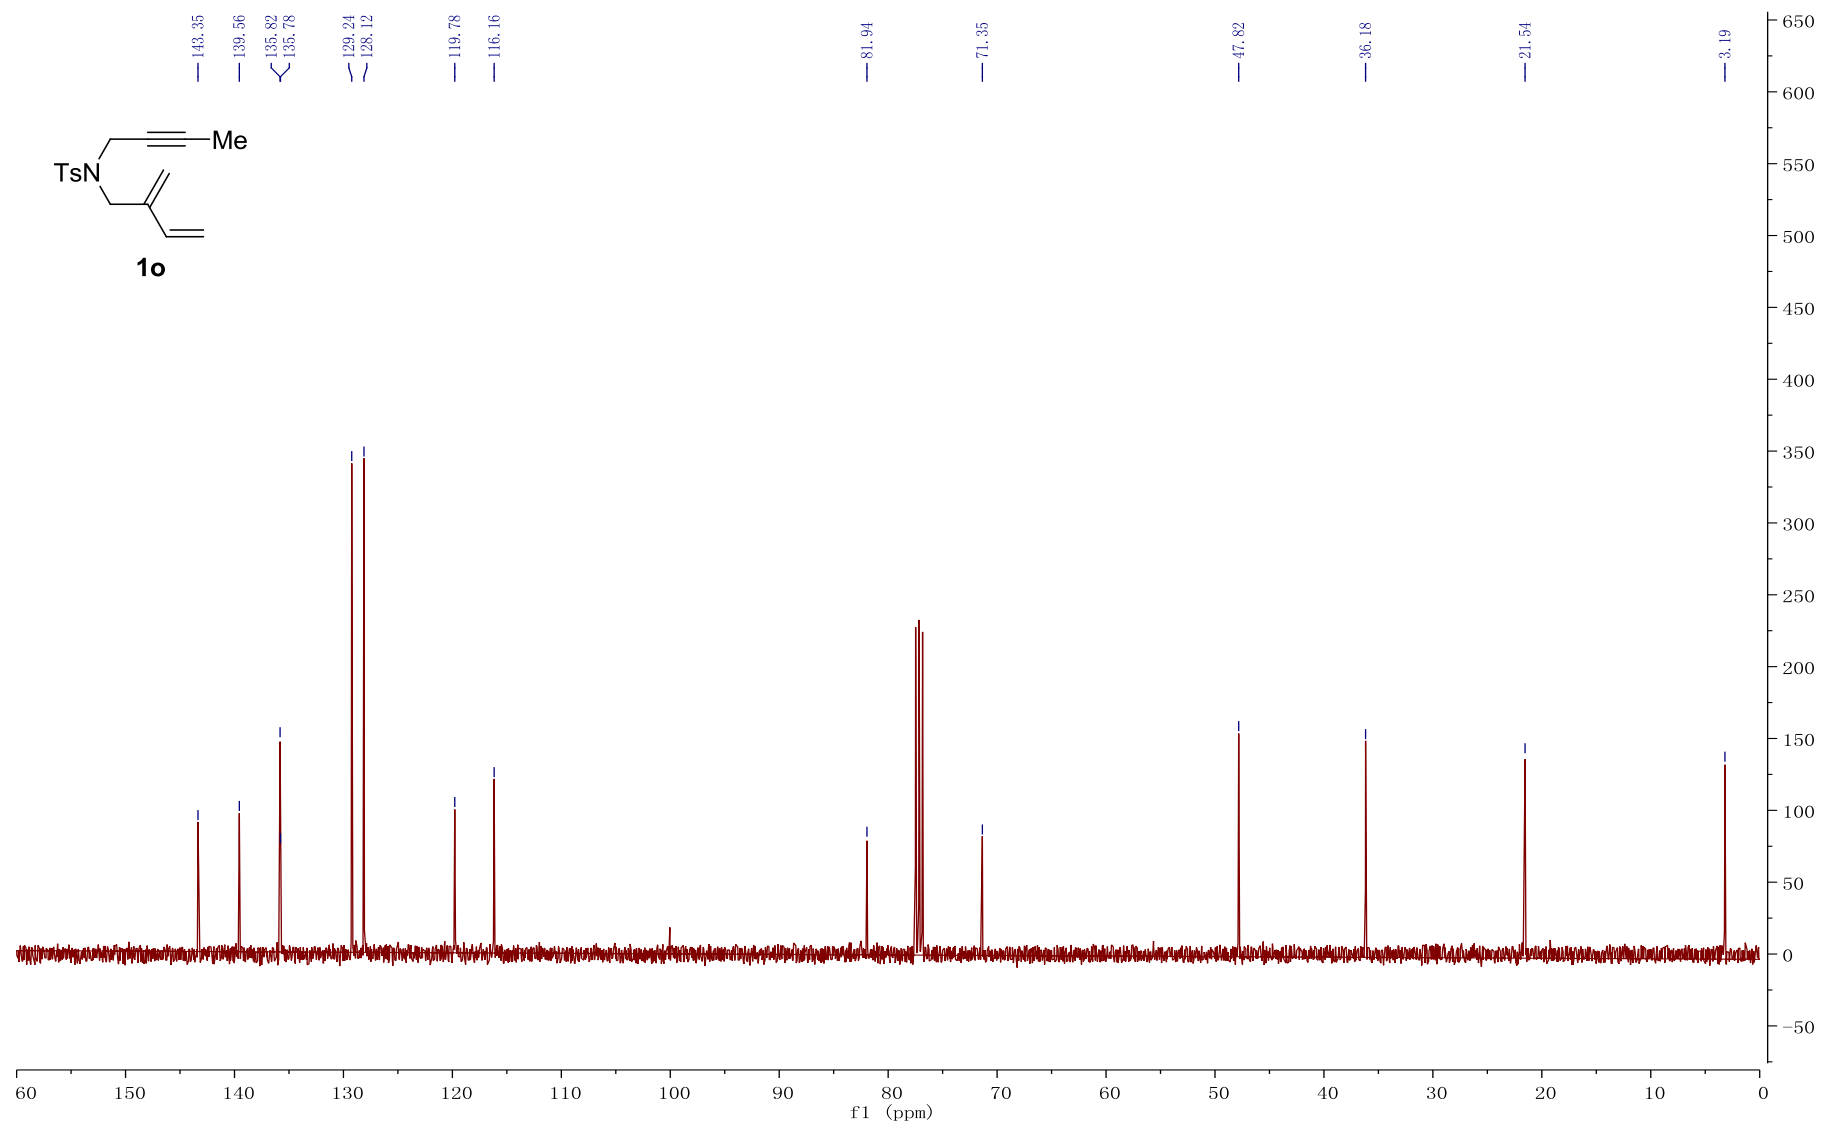

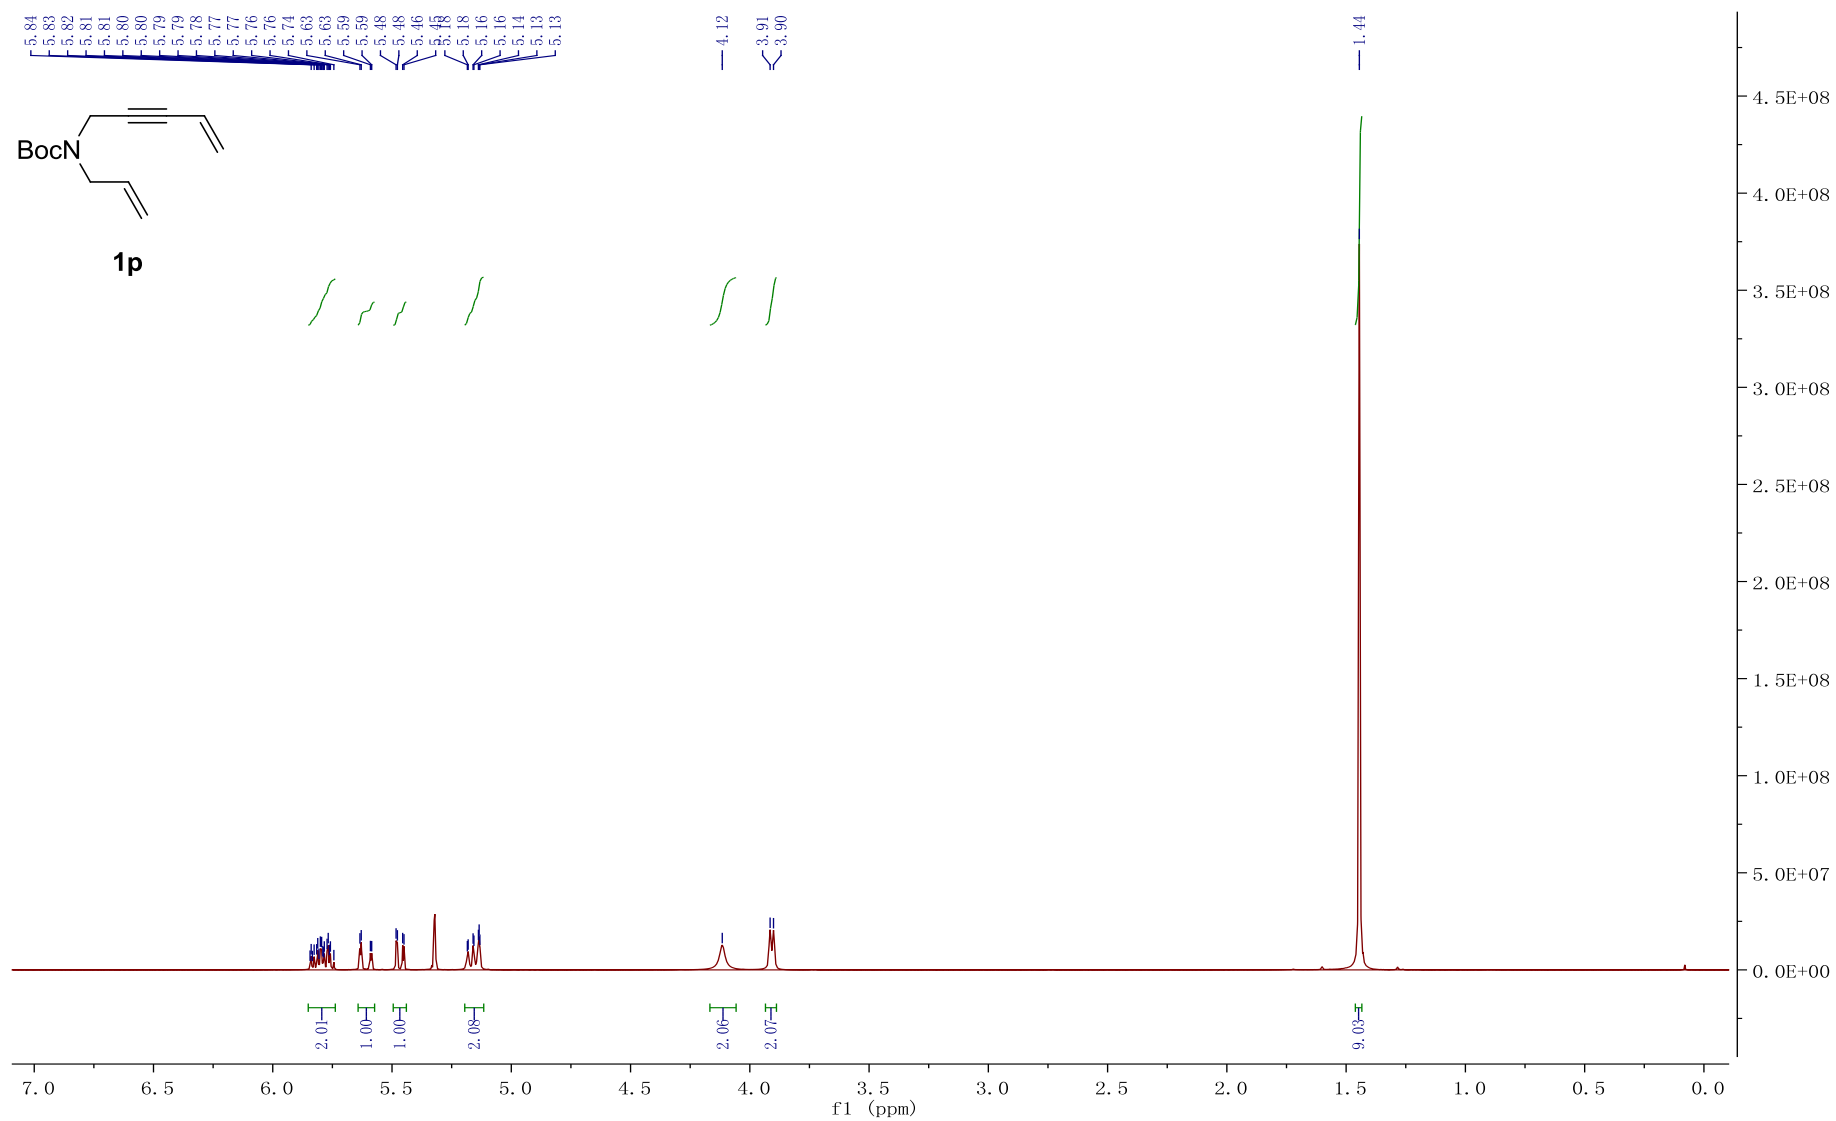

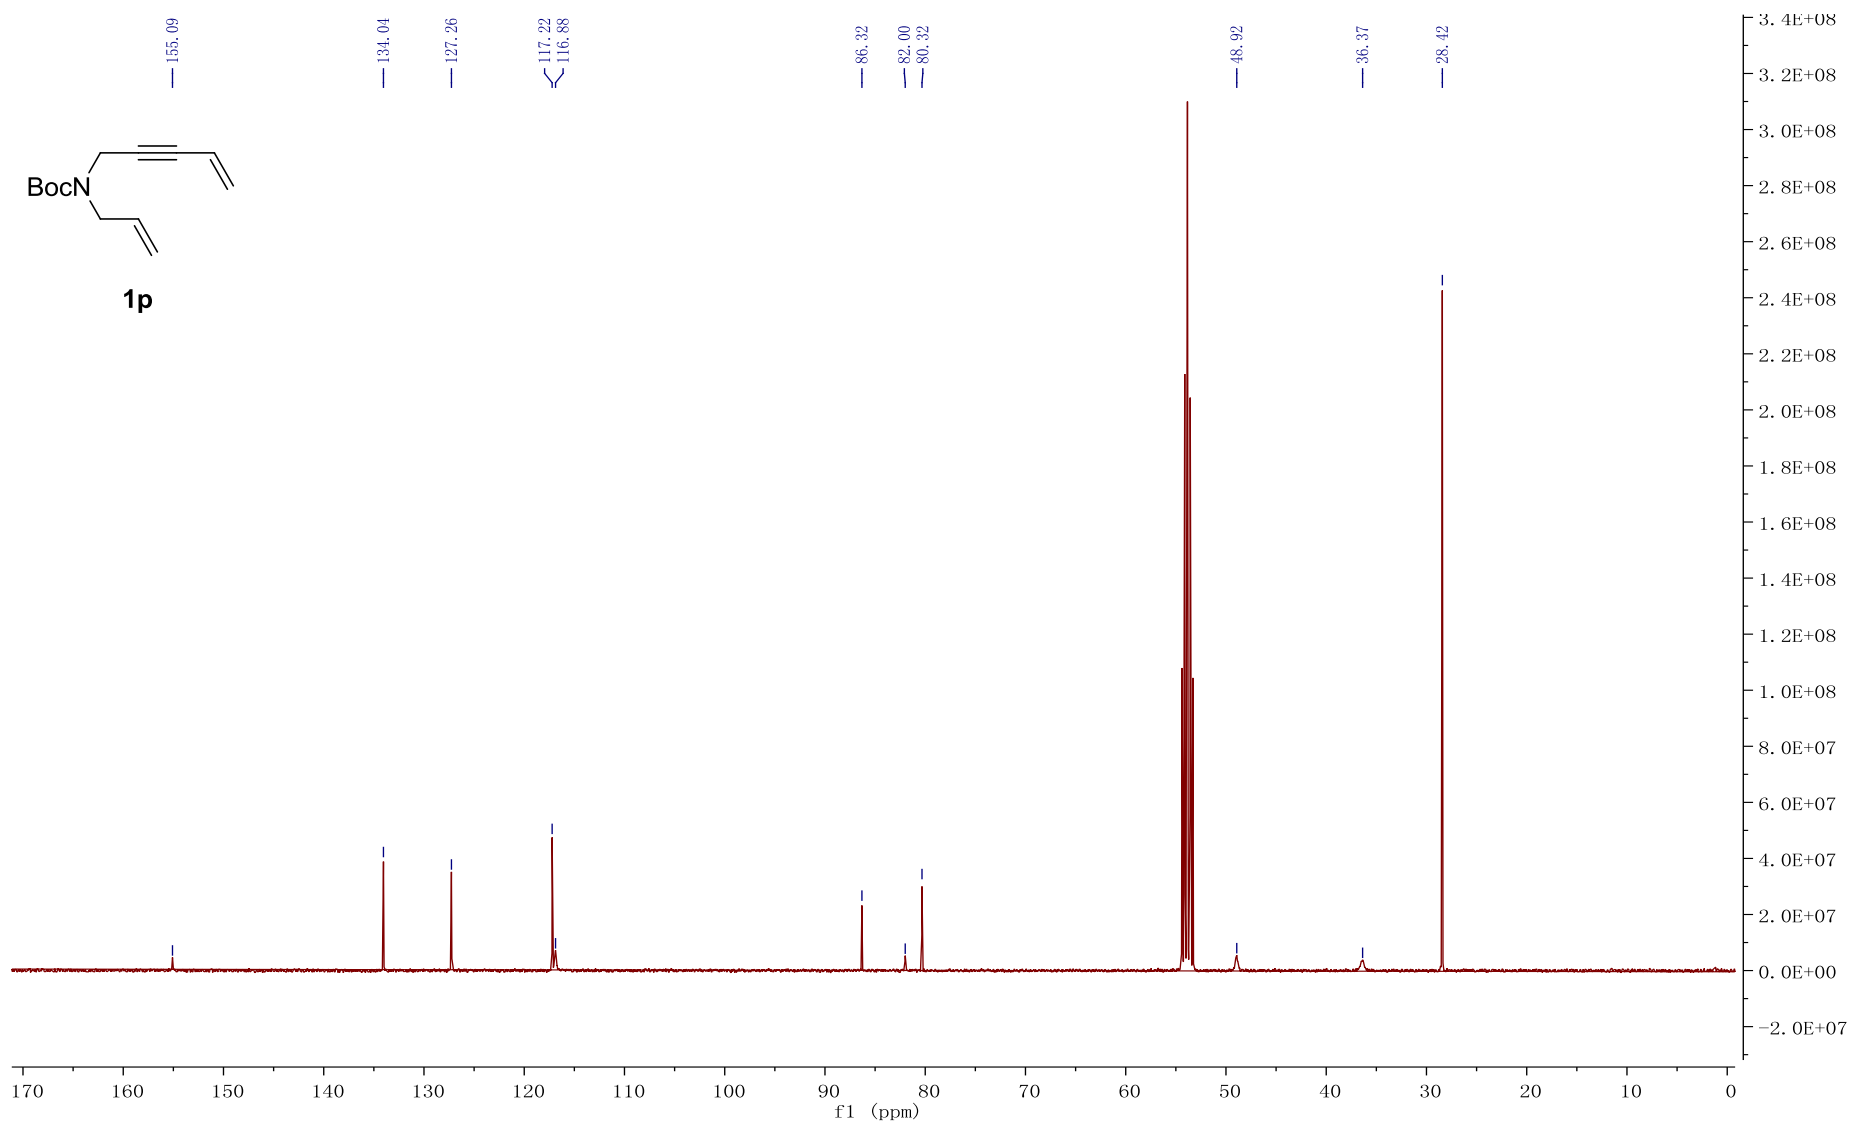

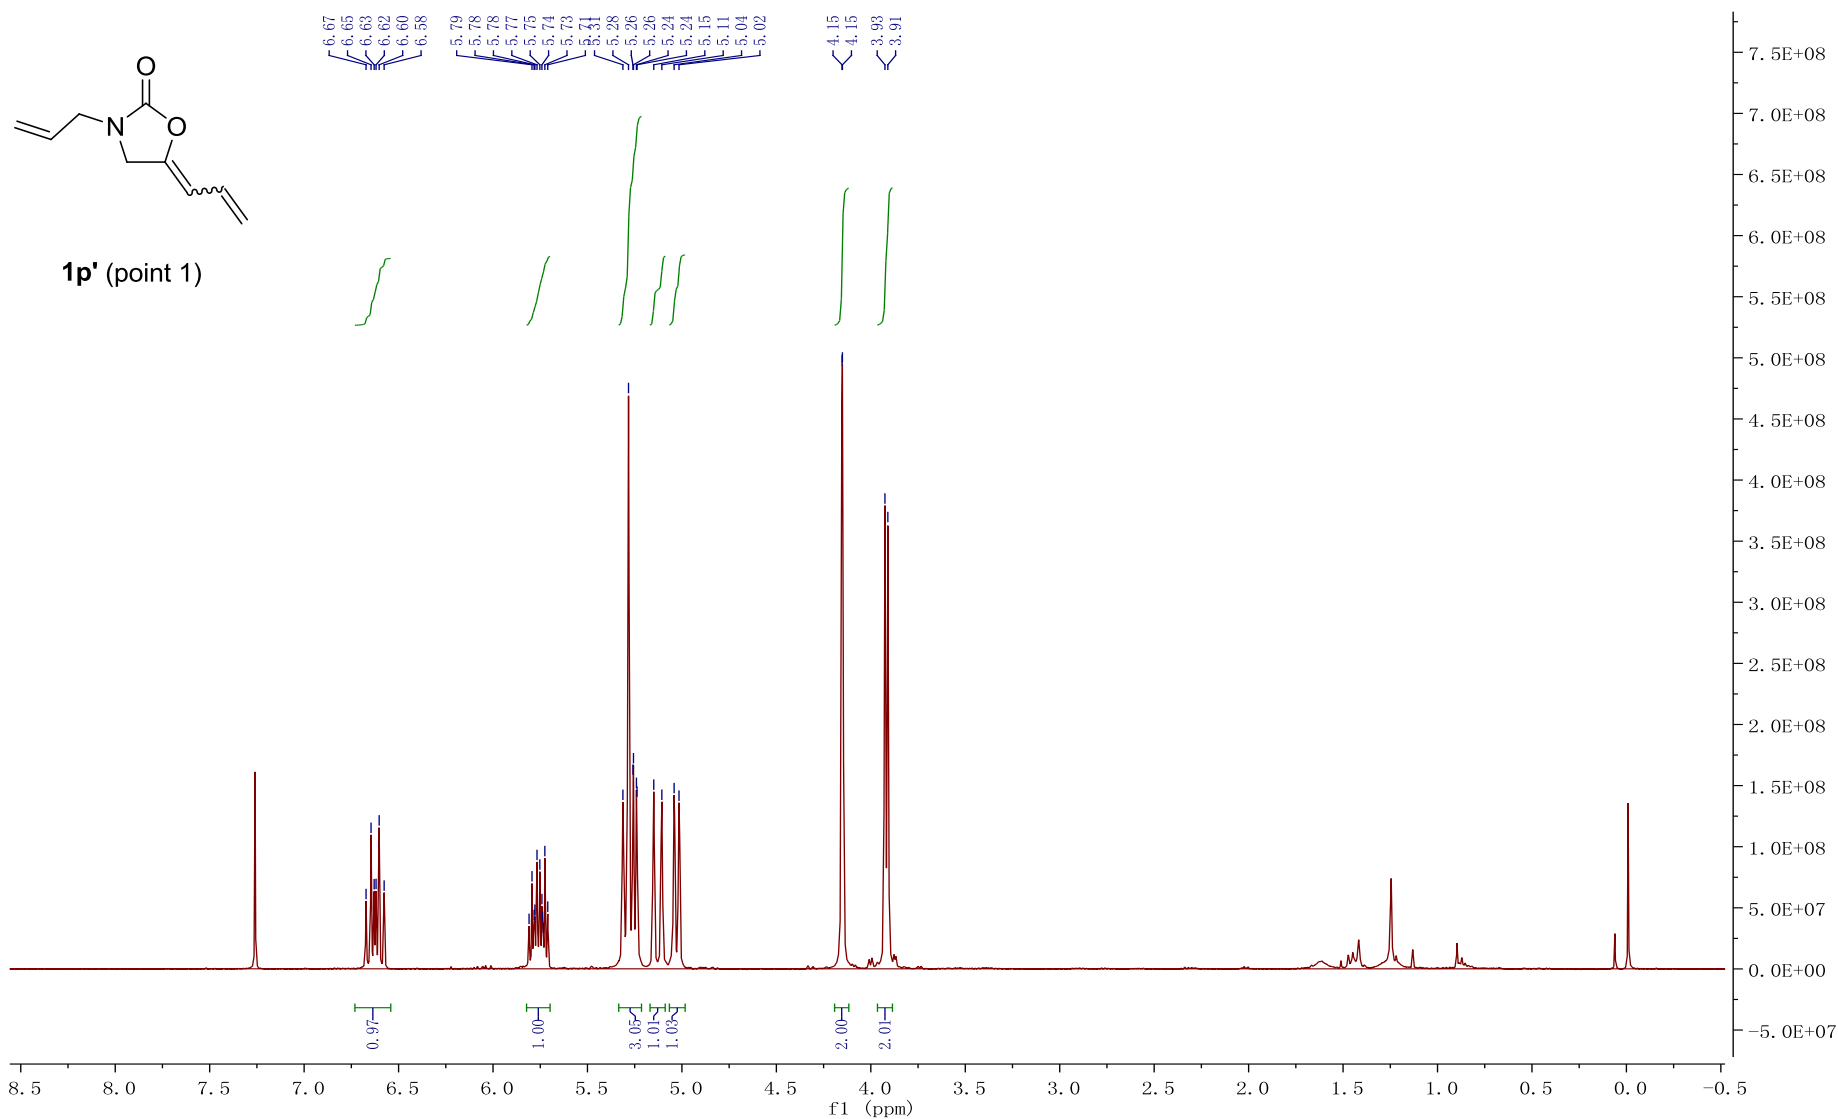

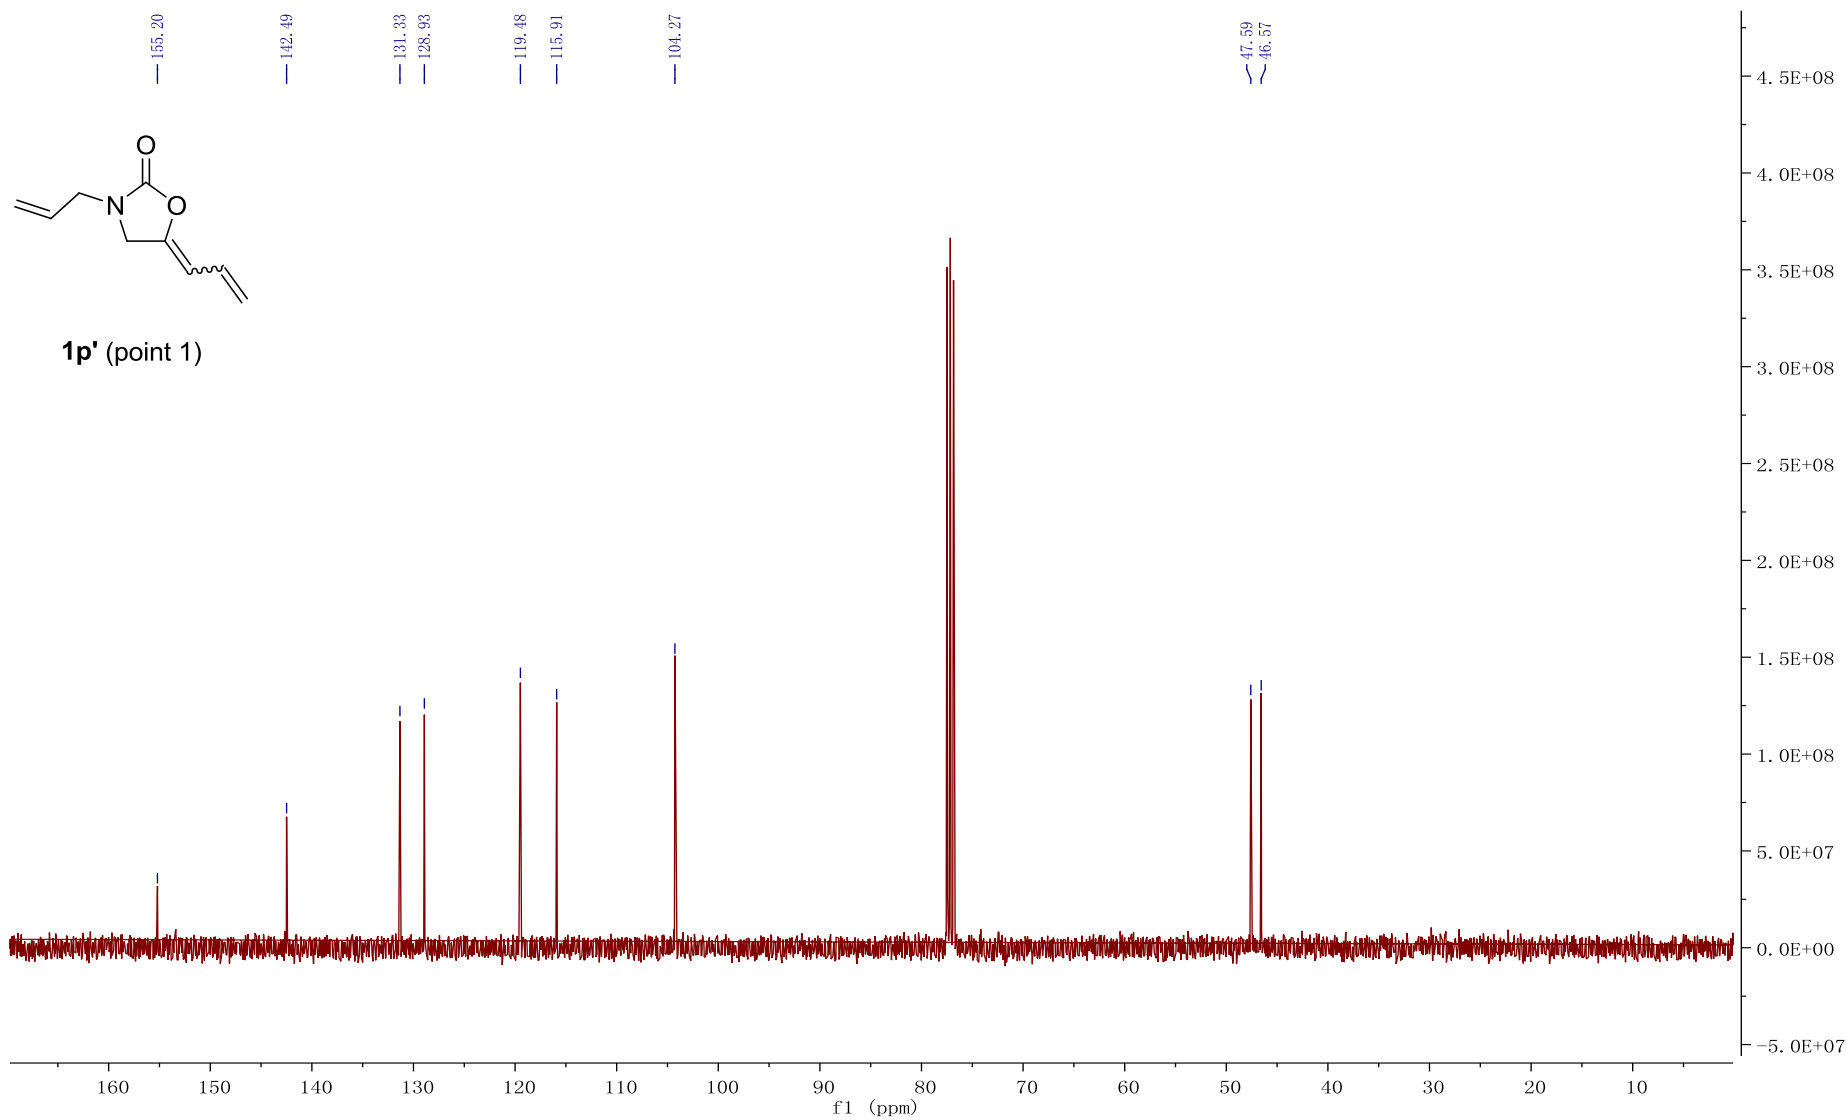

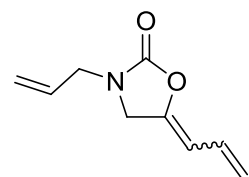

**1p'** (point 2)

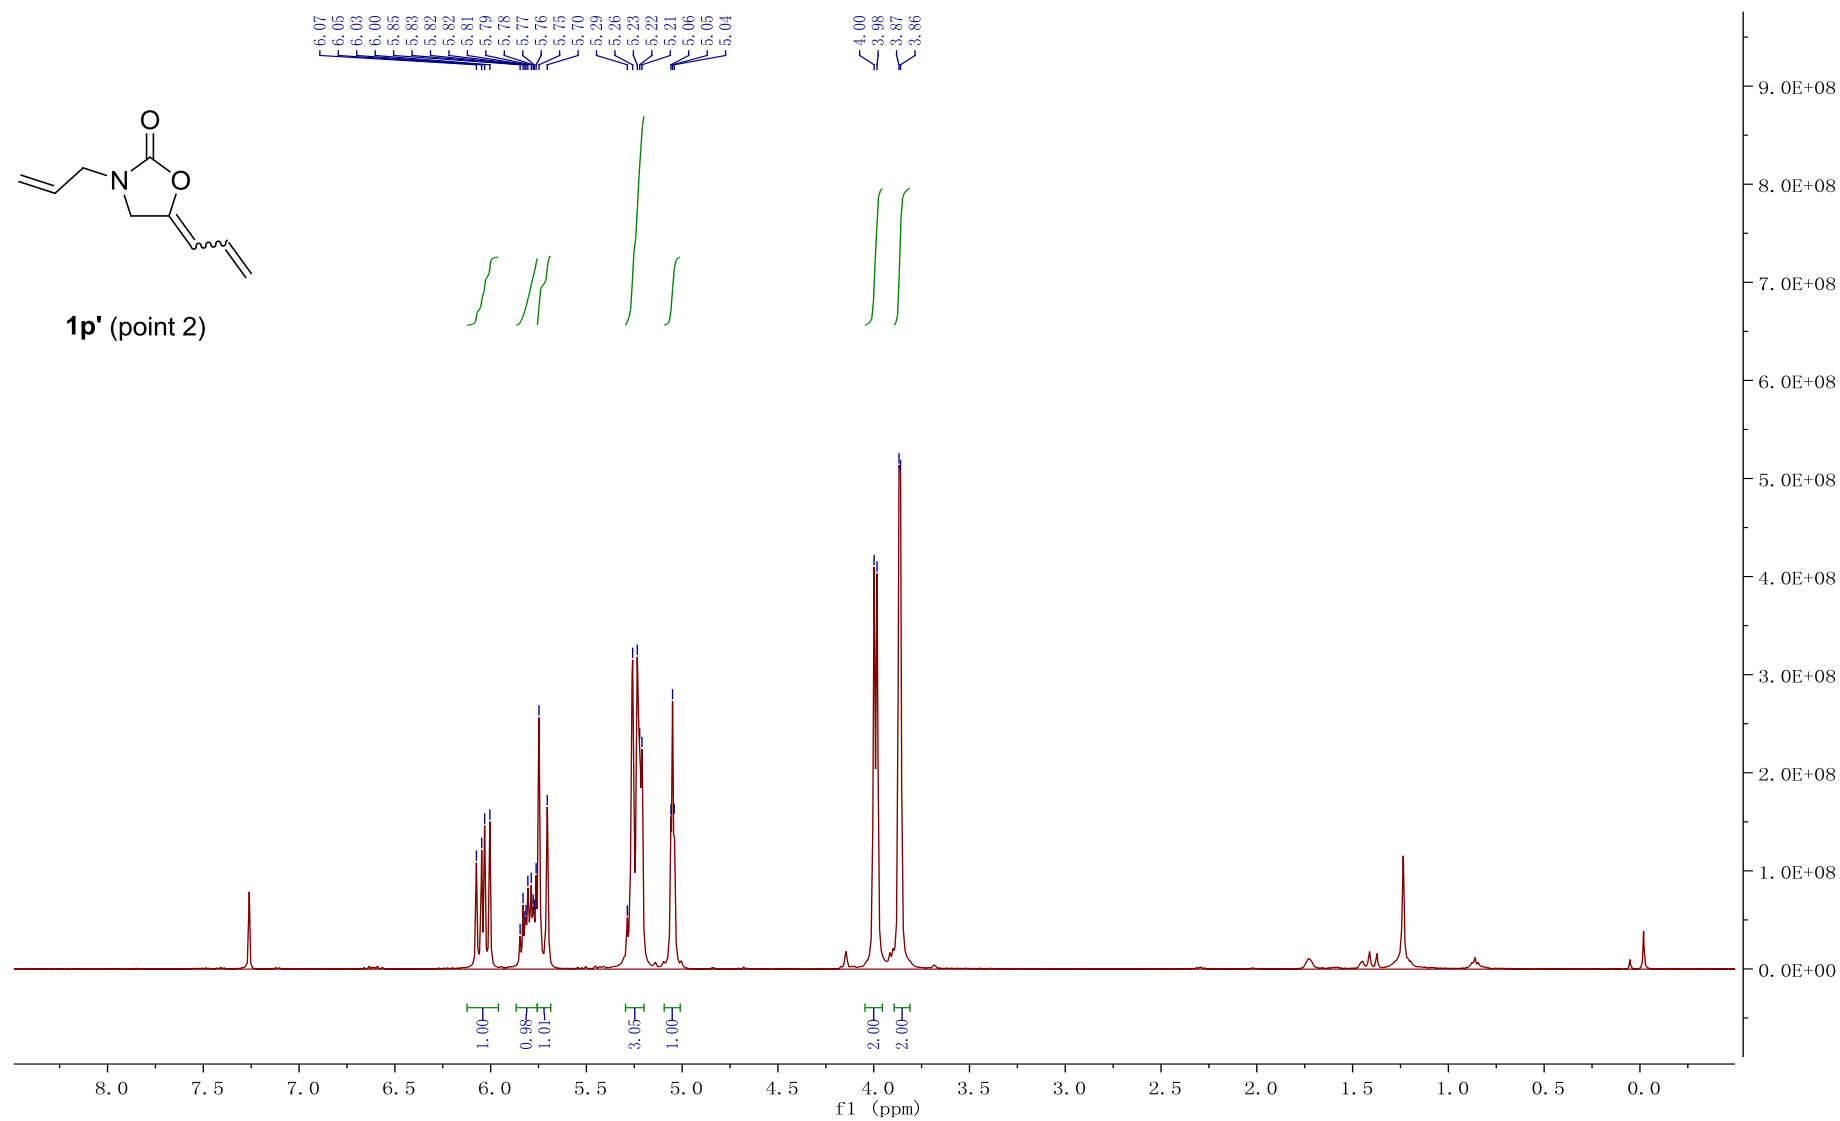

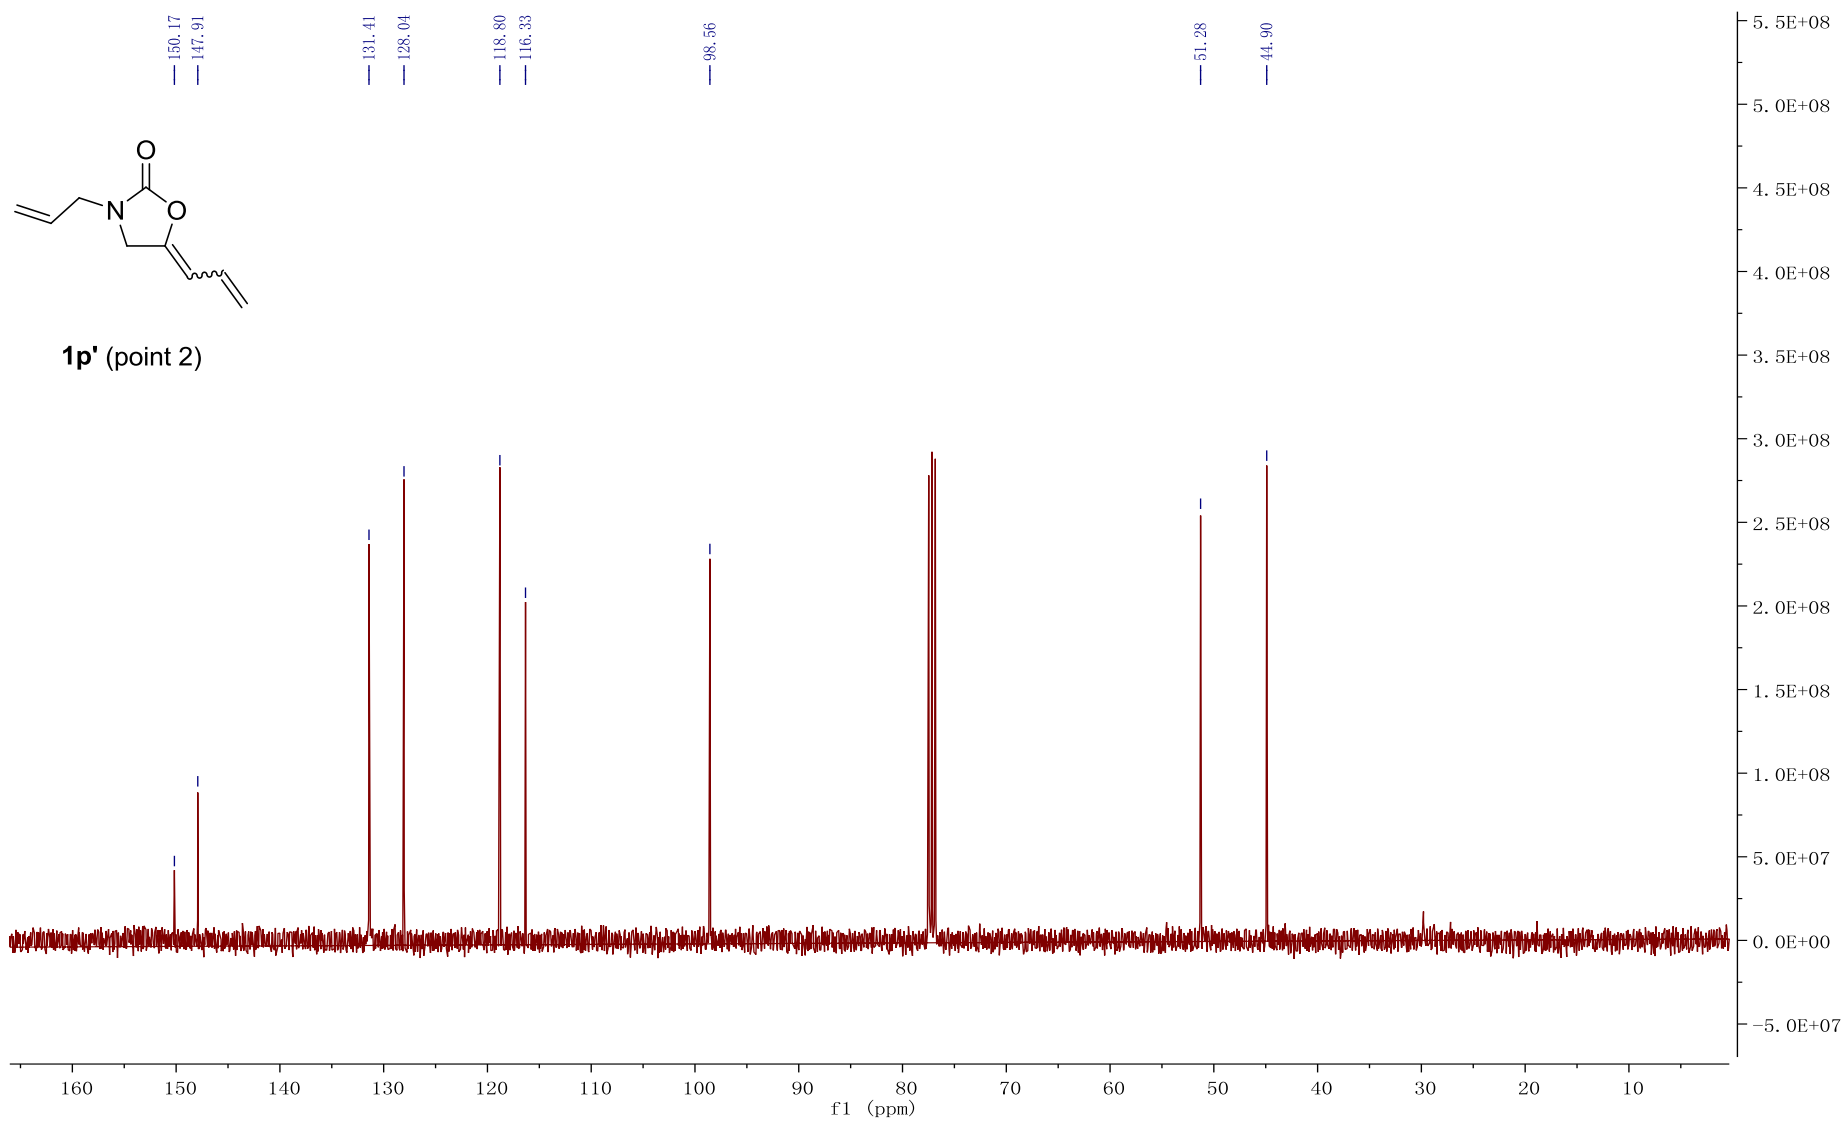

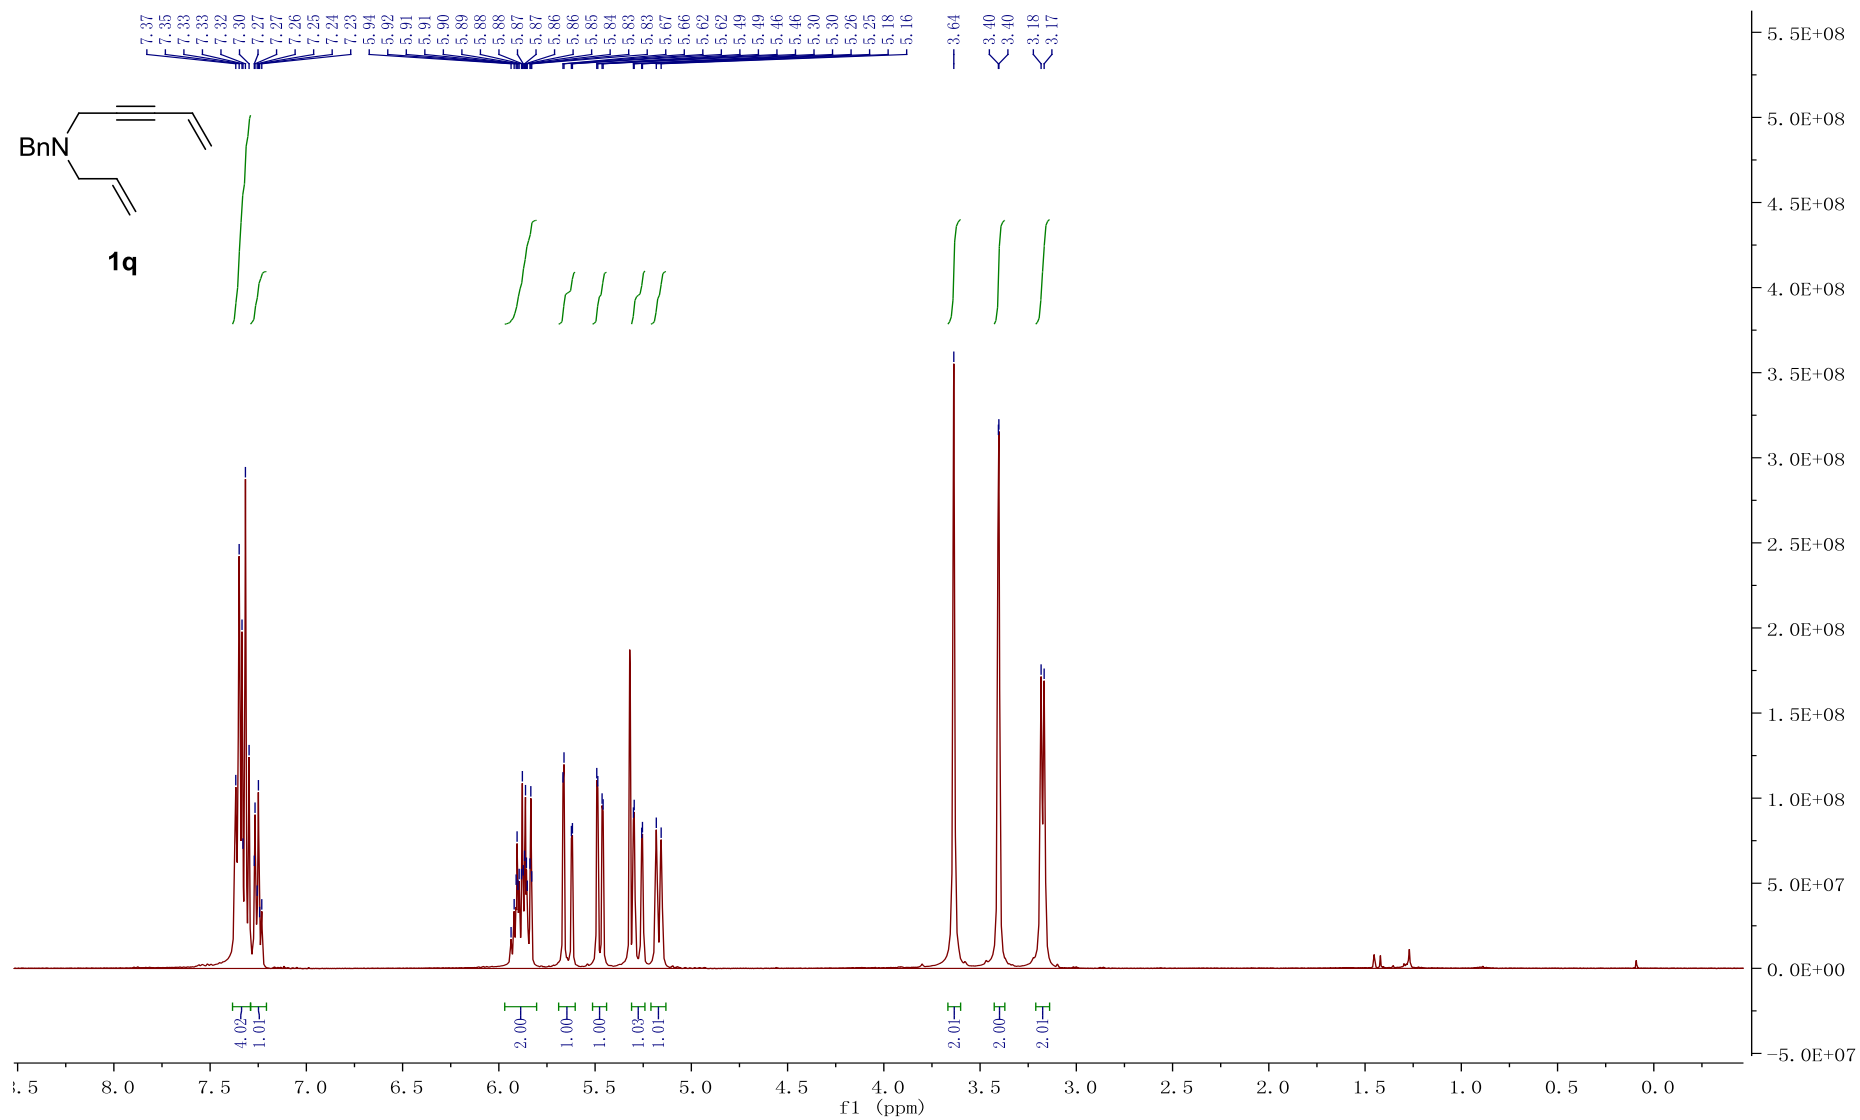

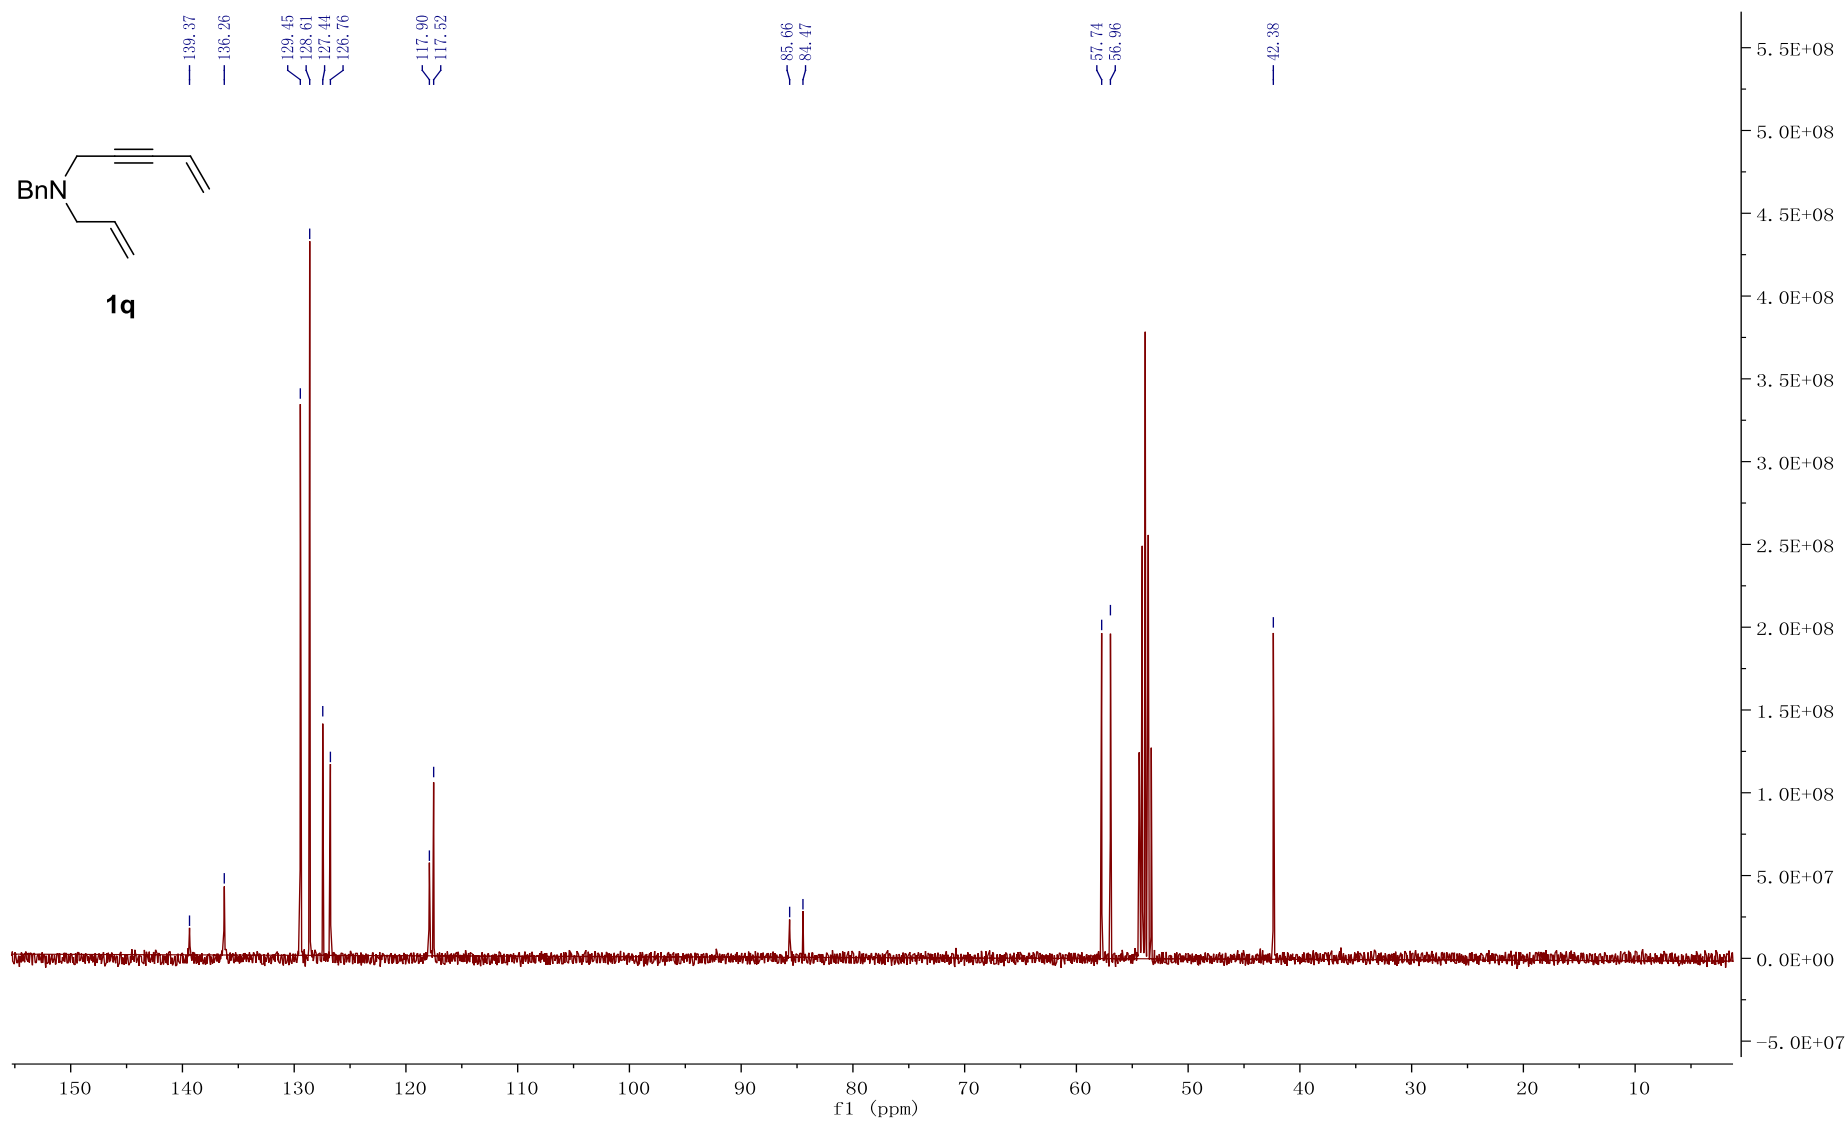

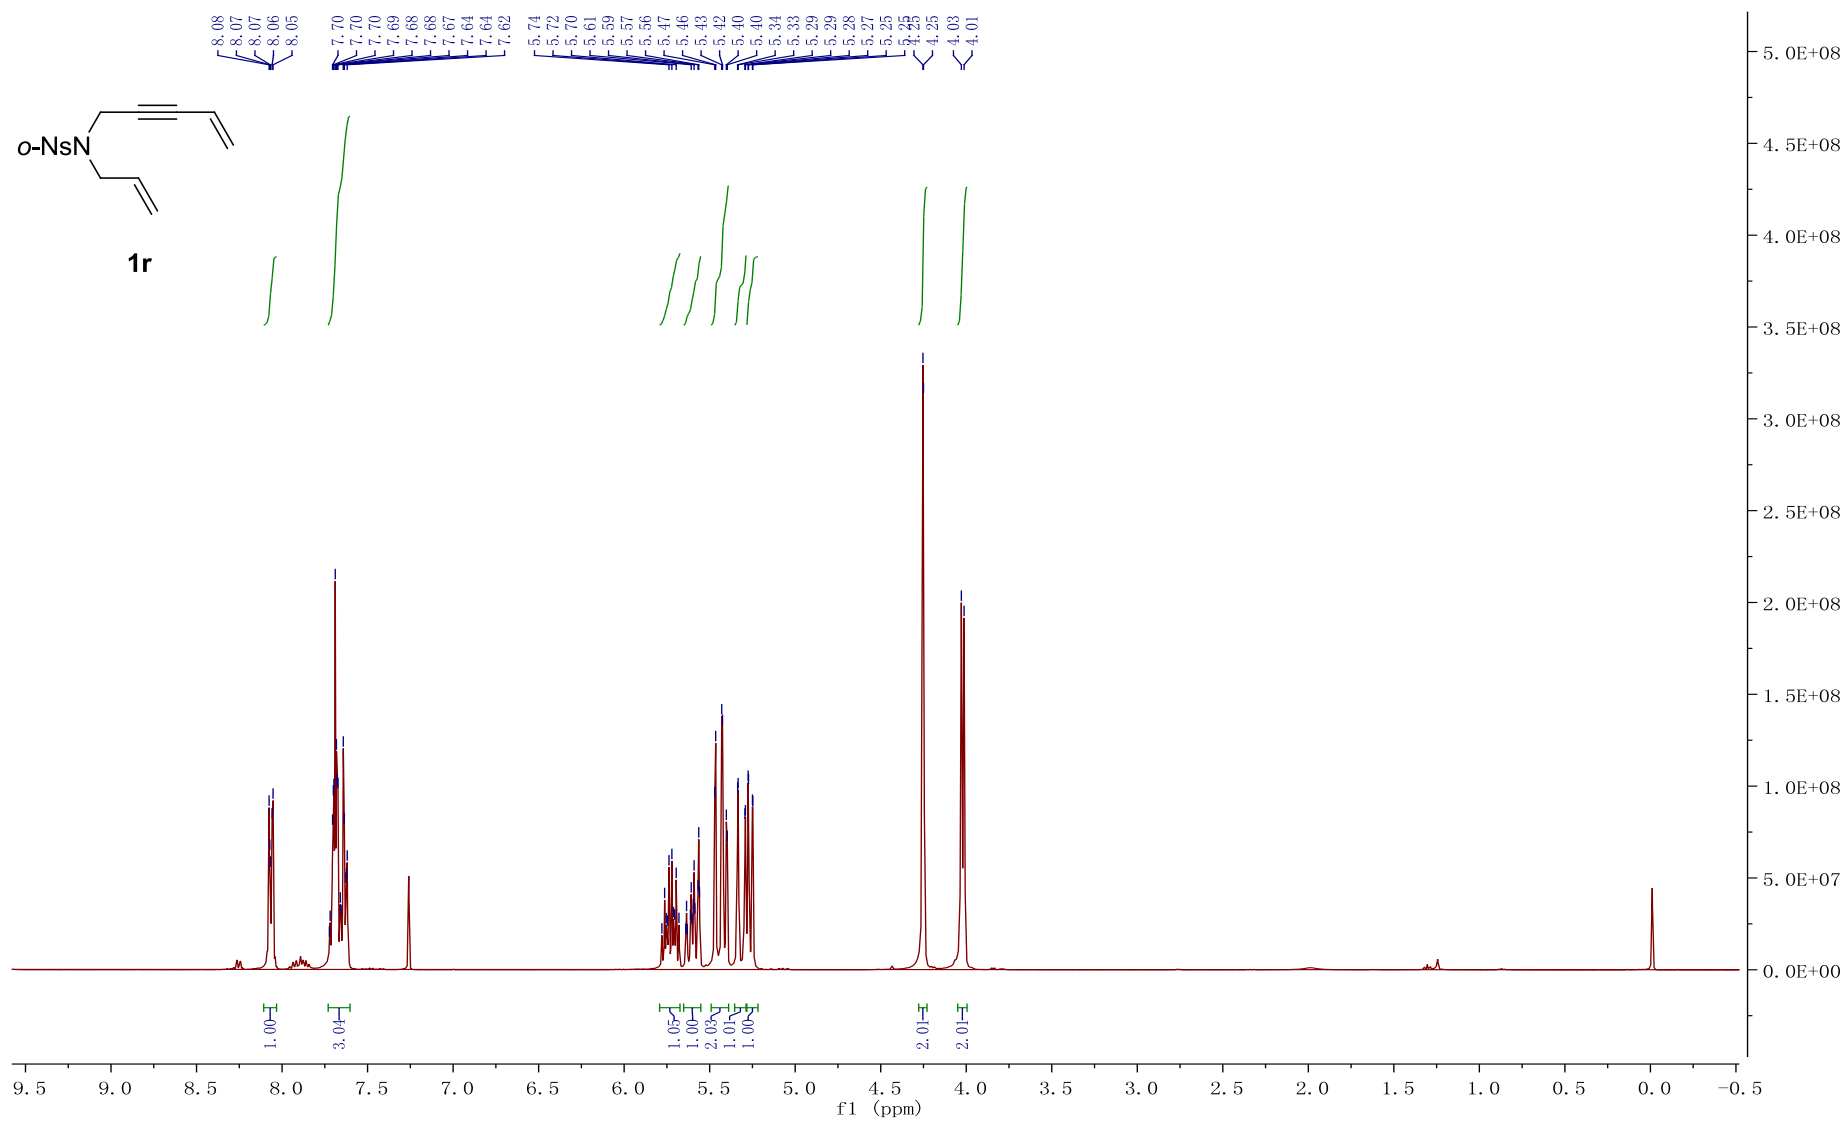

S80

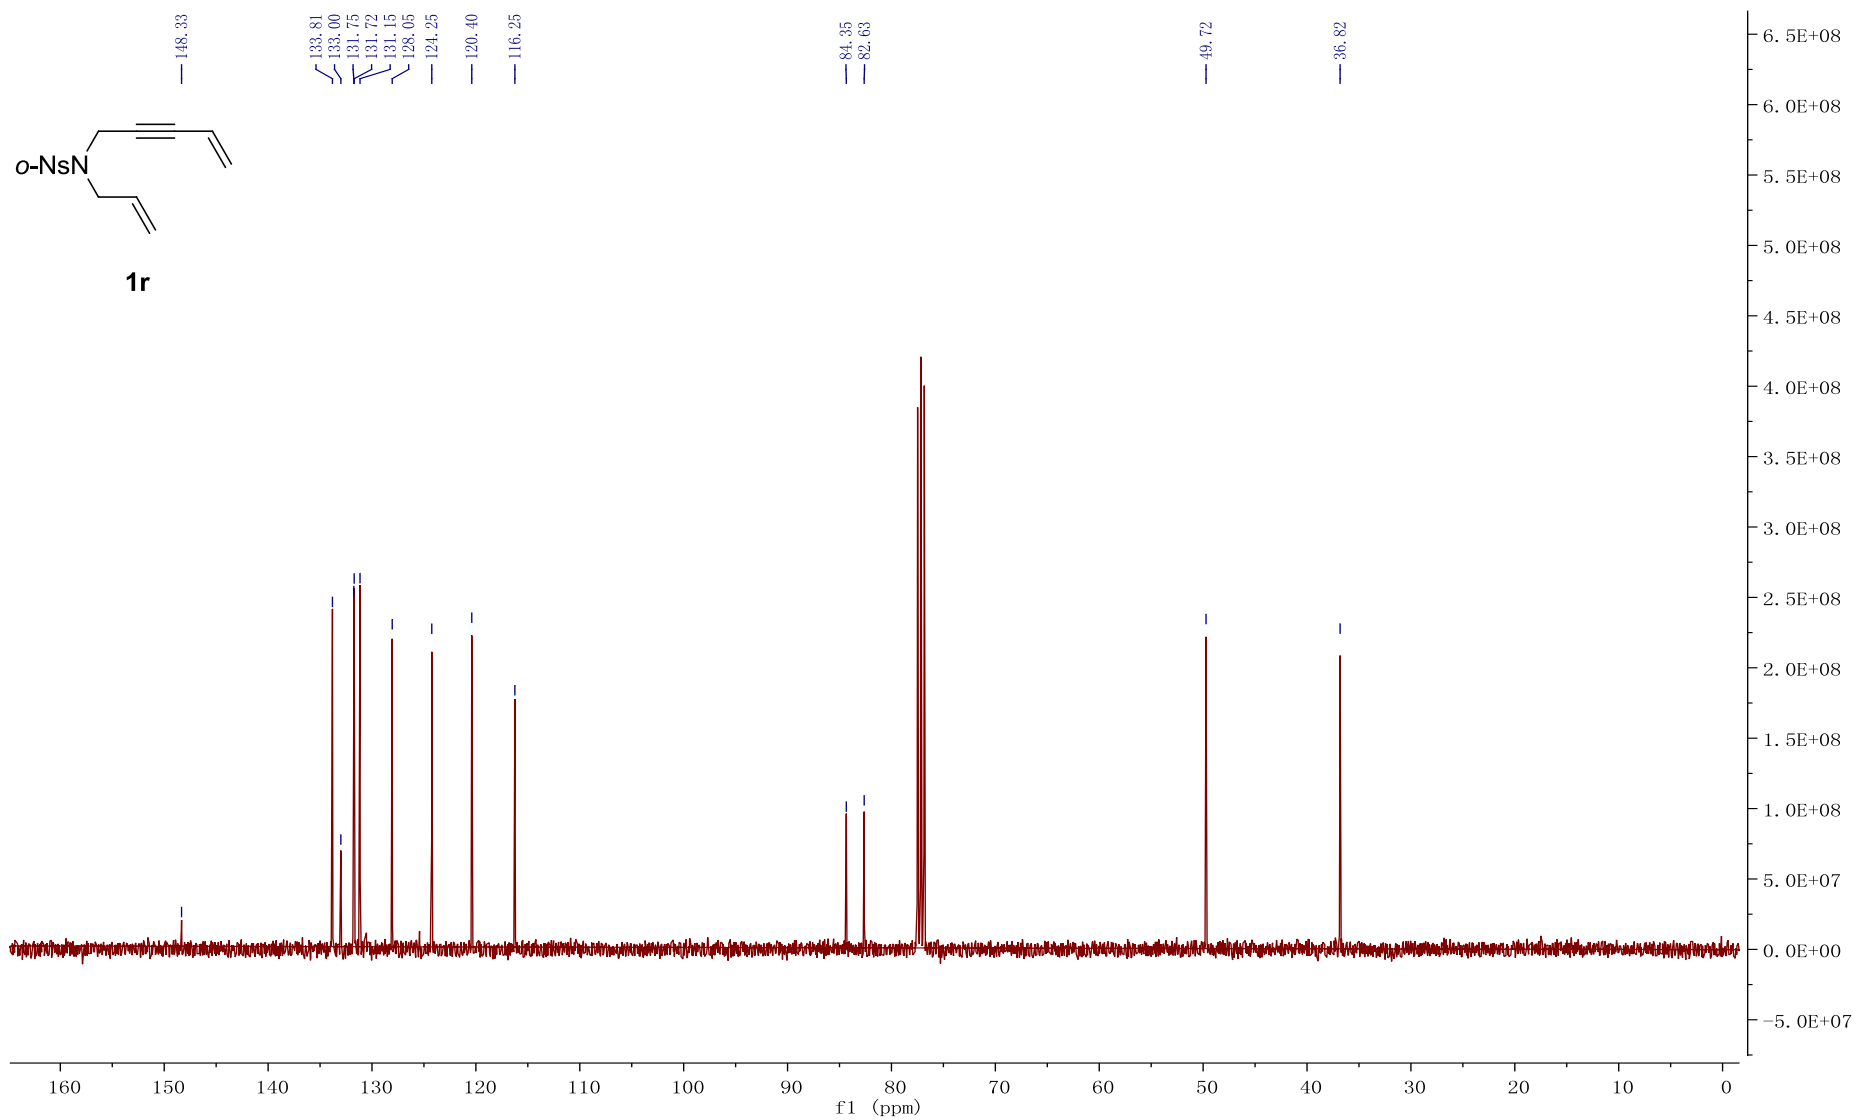

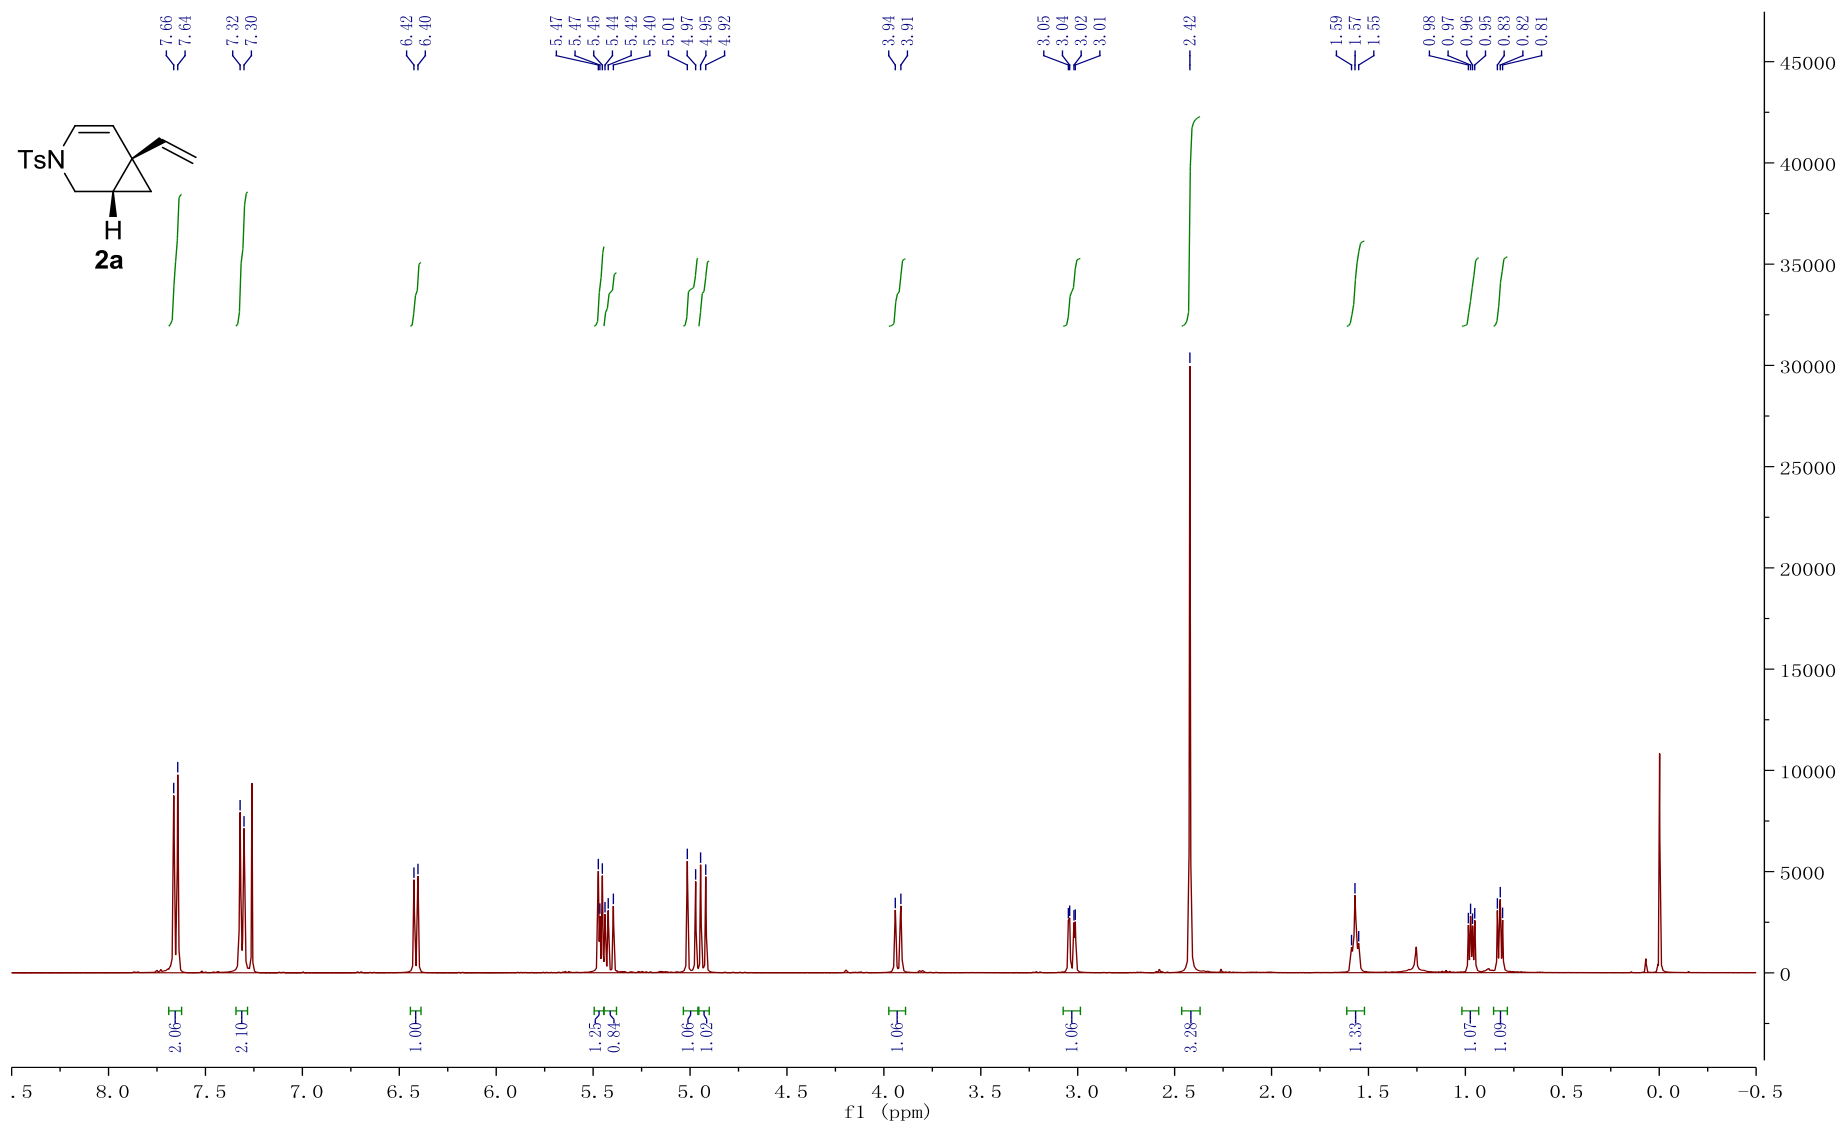

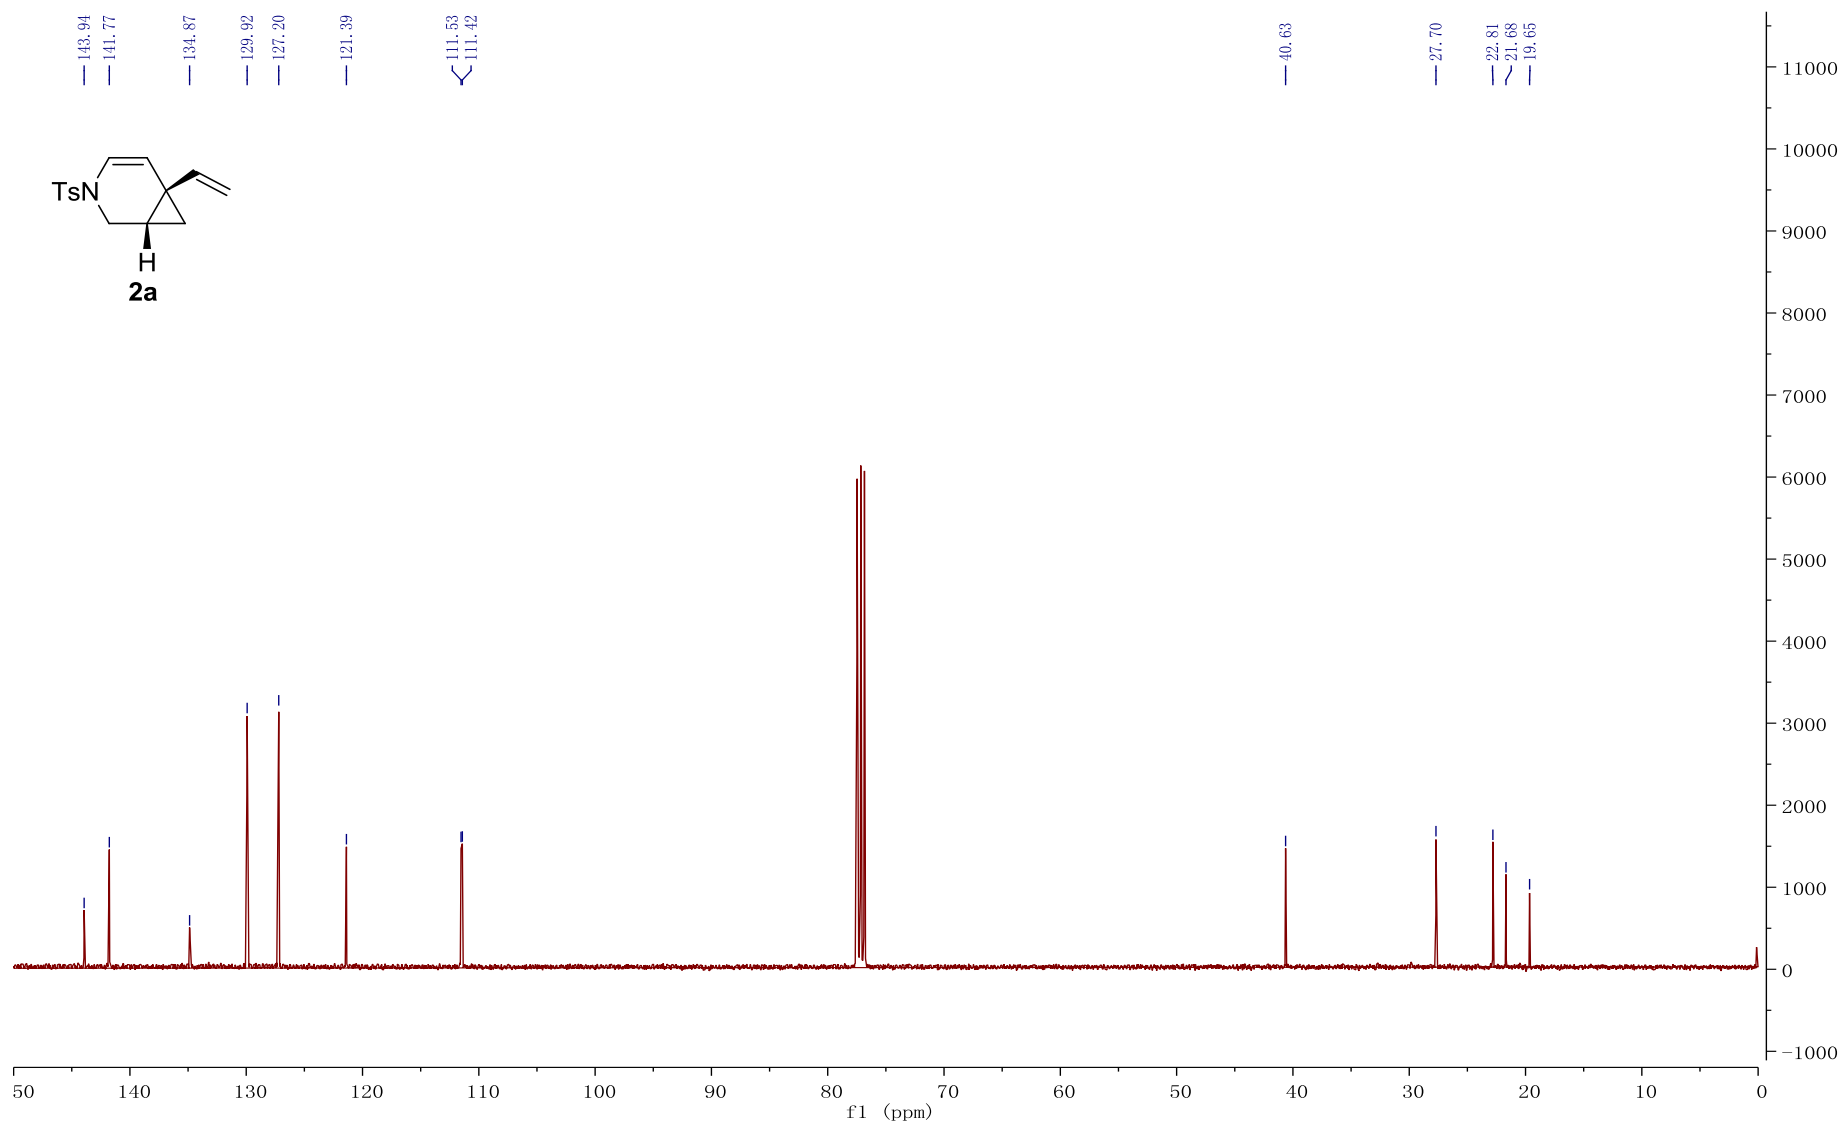

S83

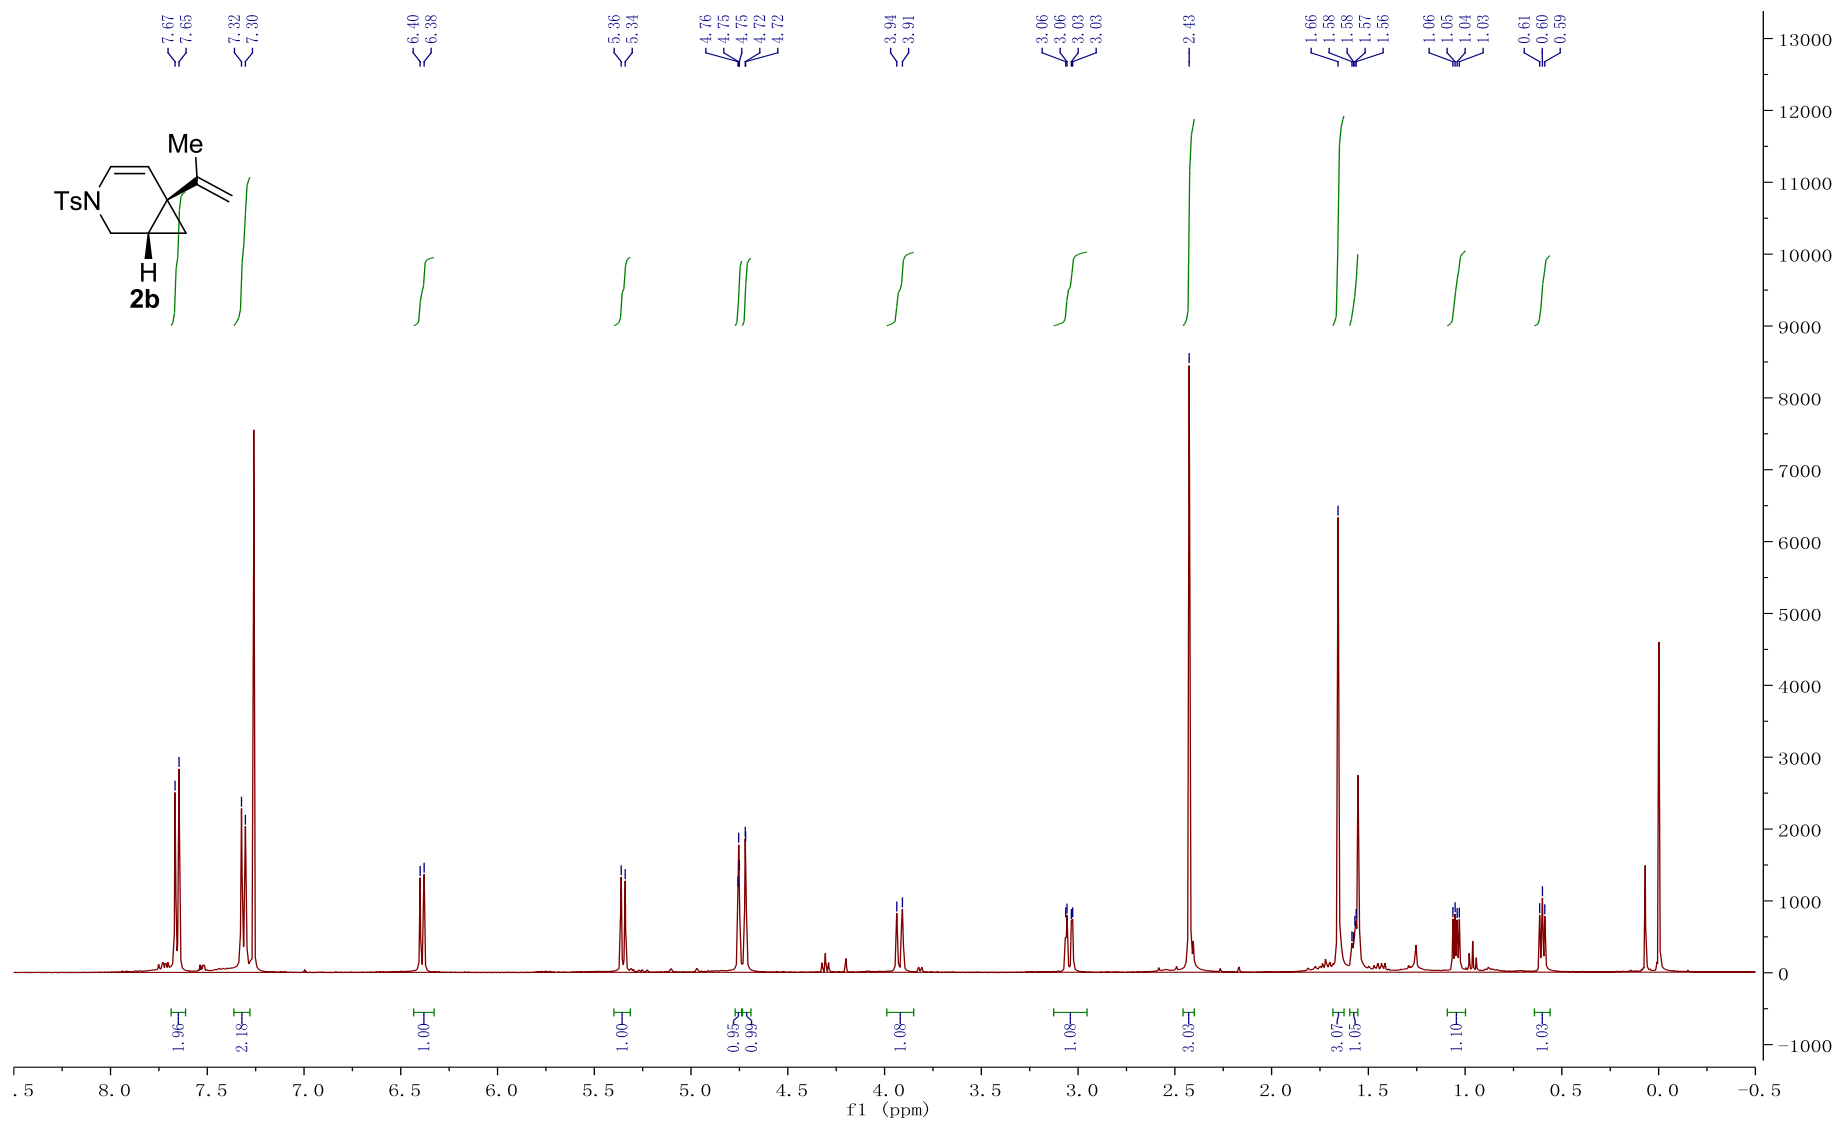

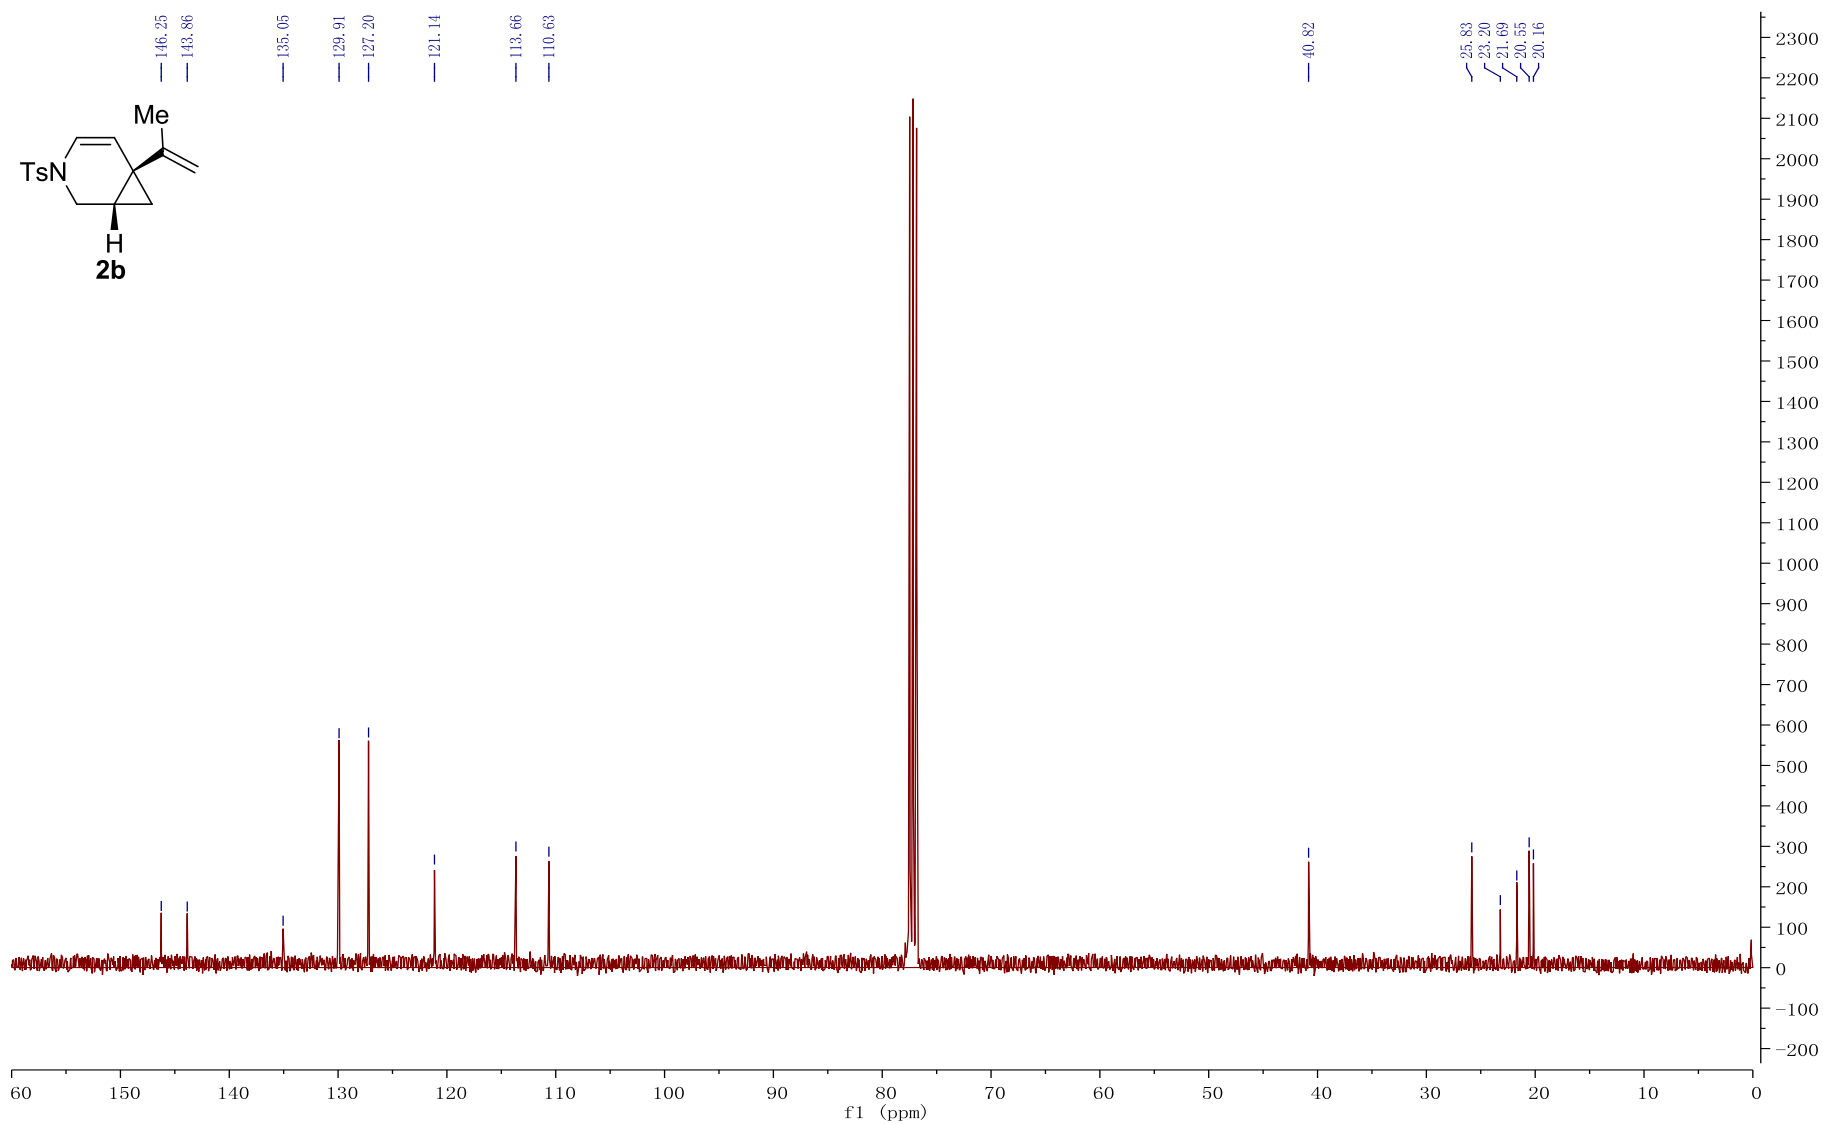

S85

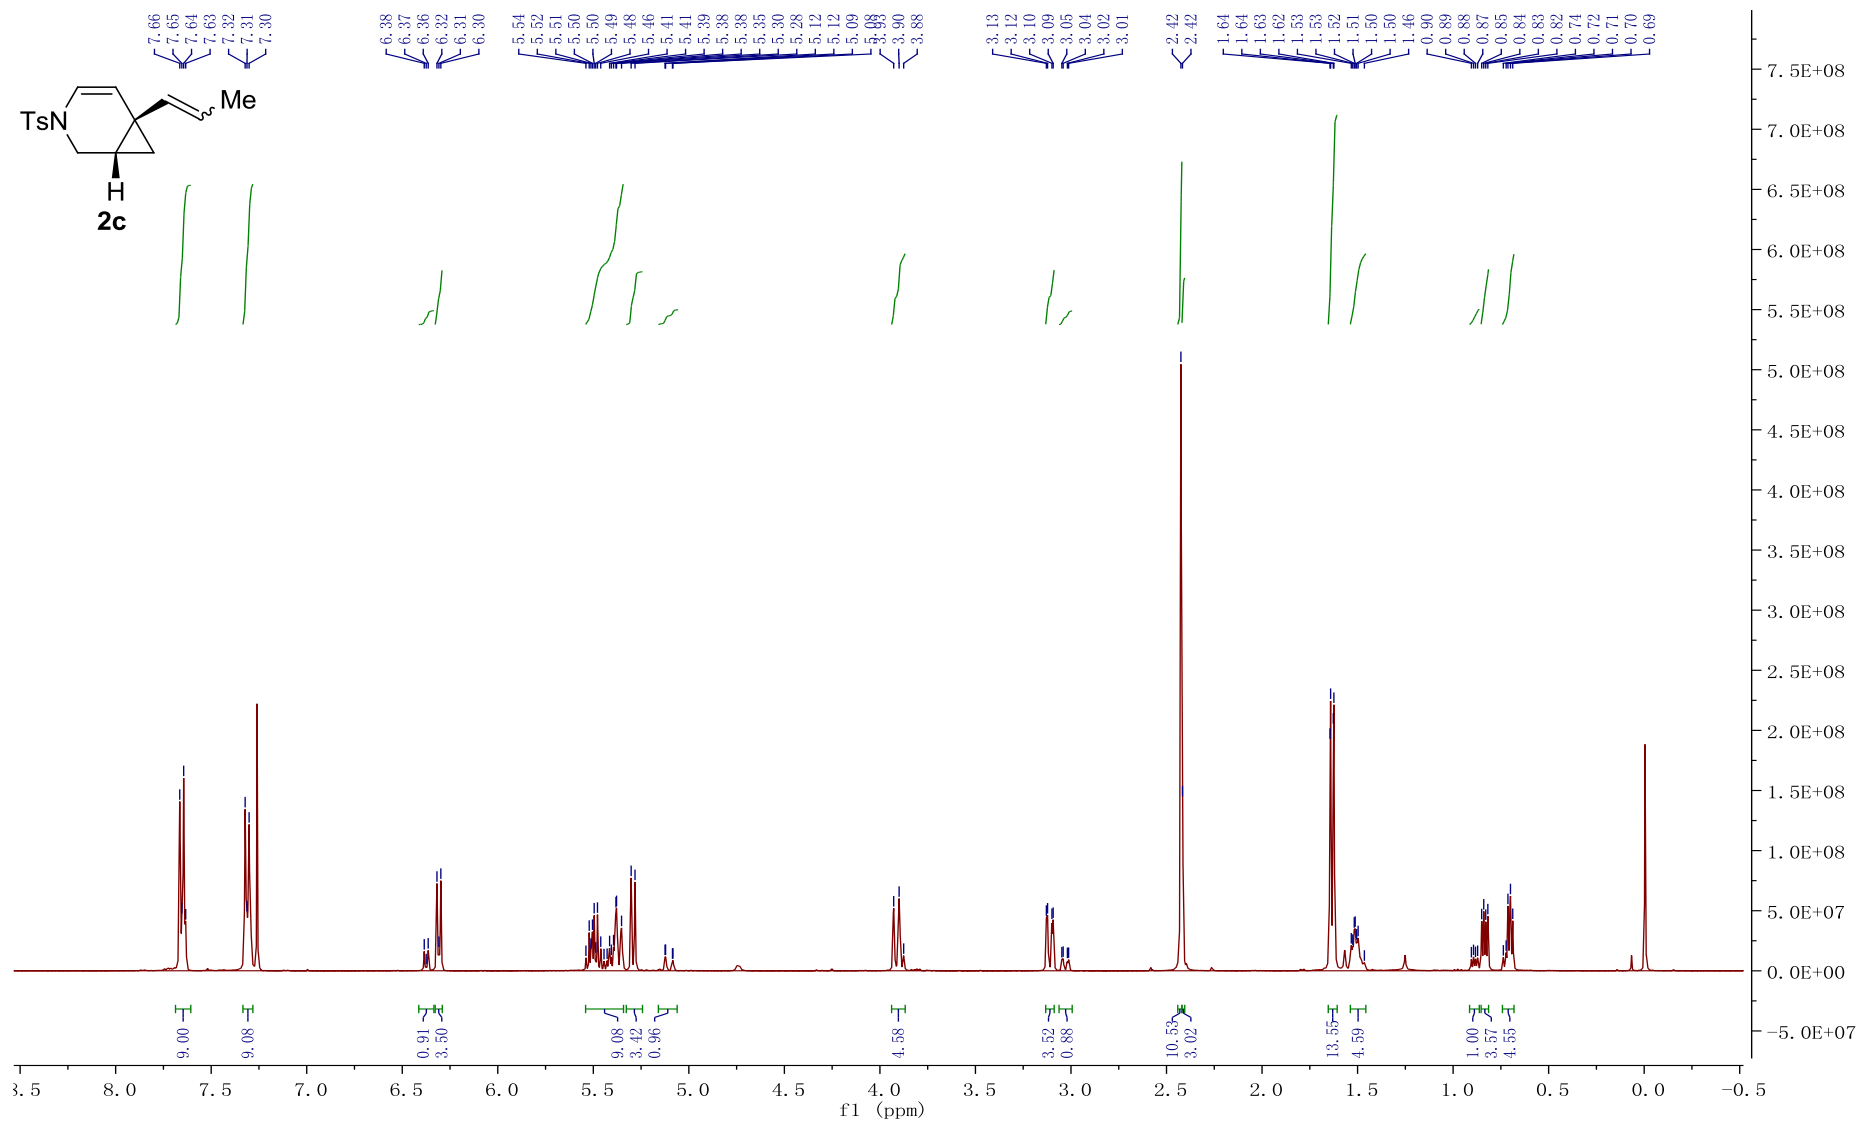

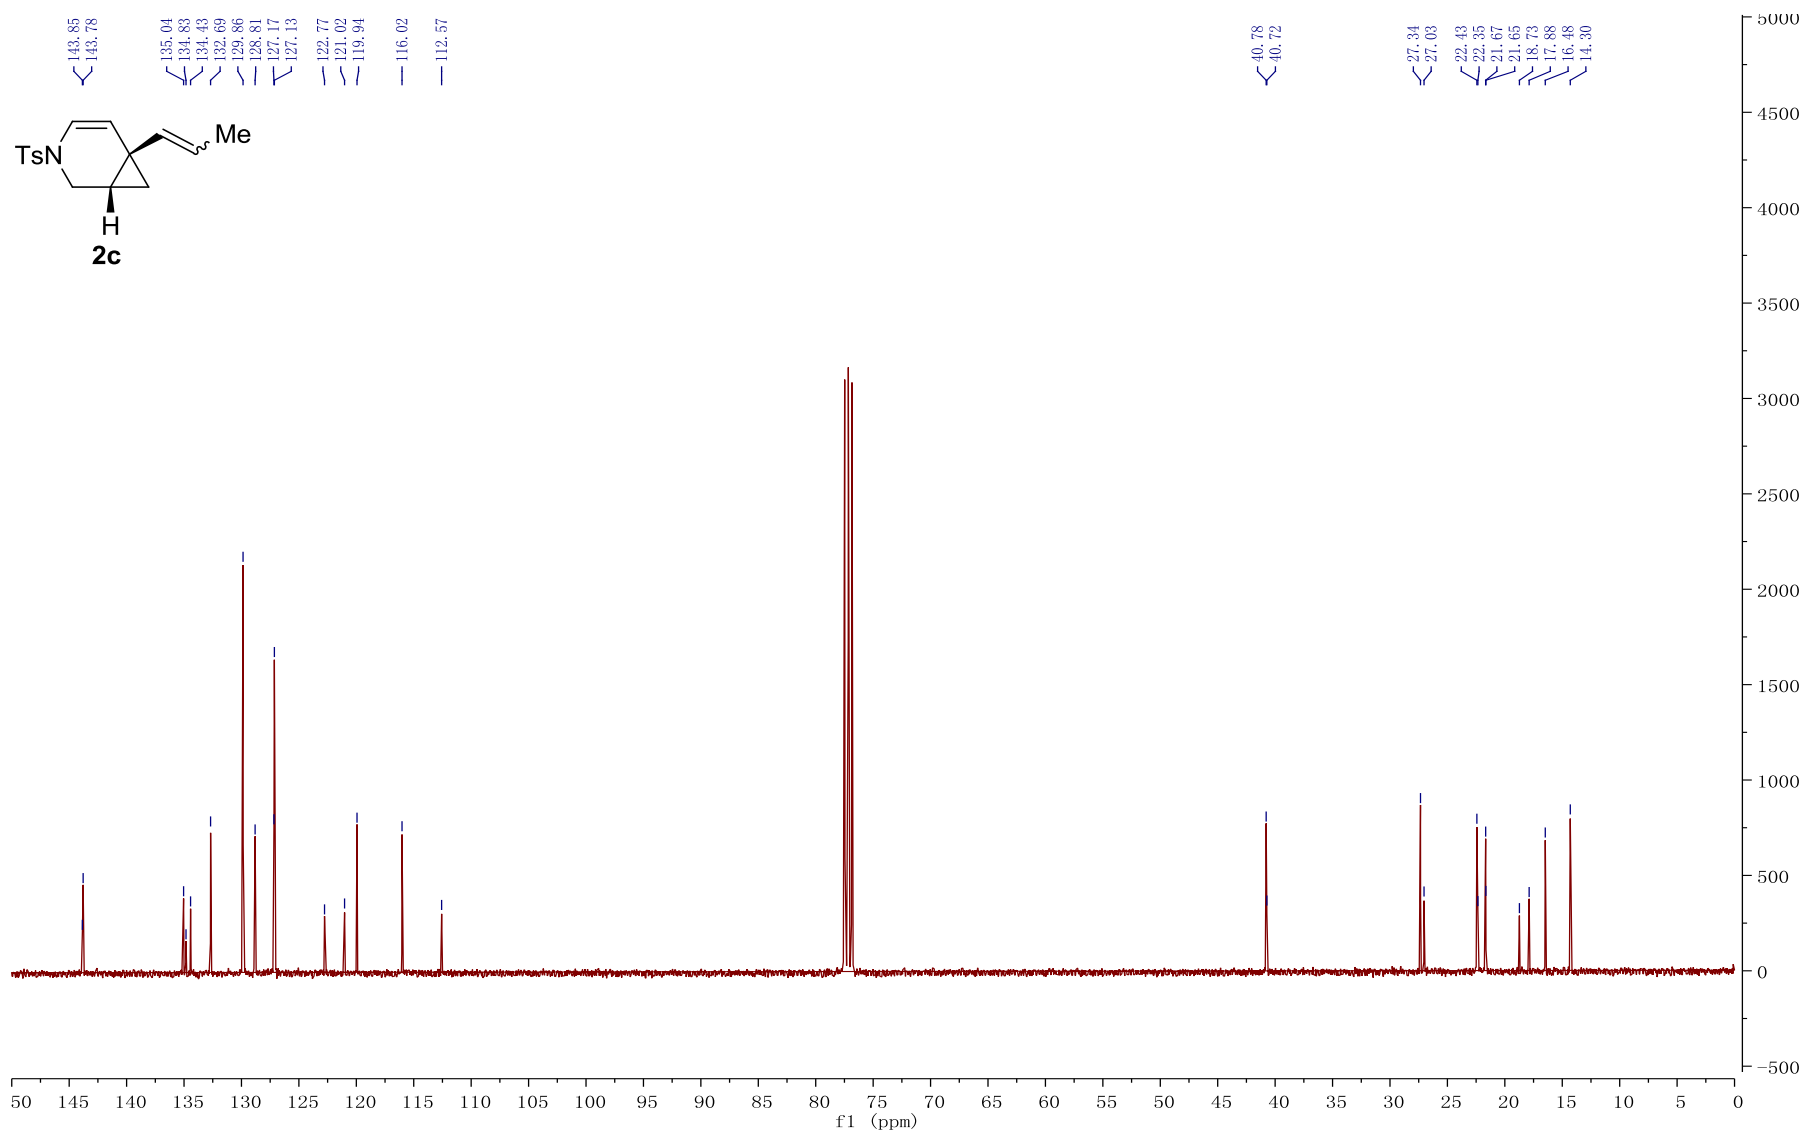

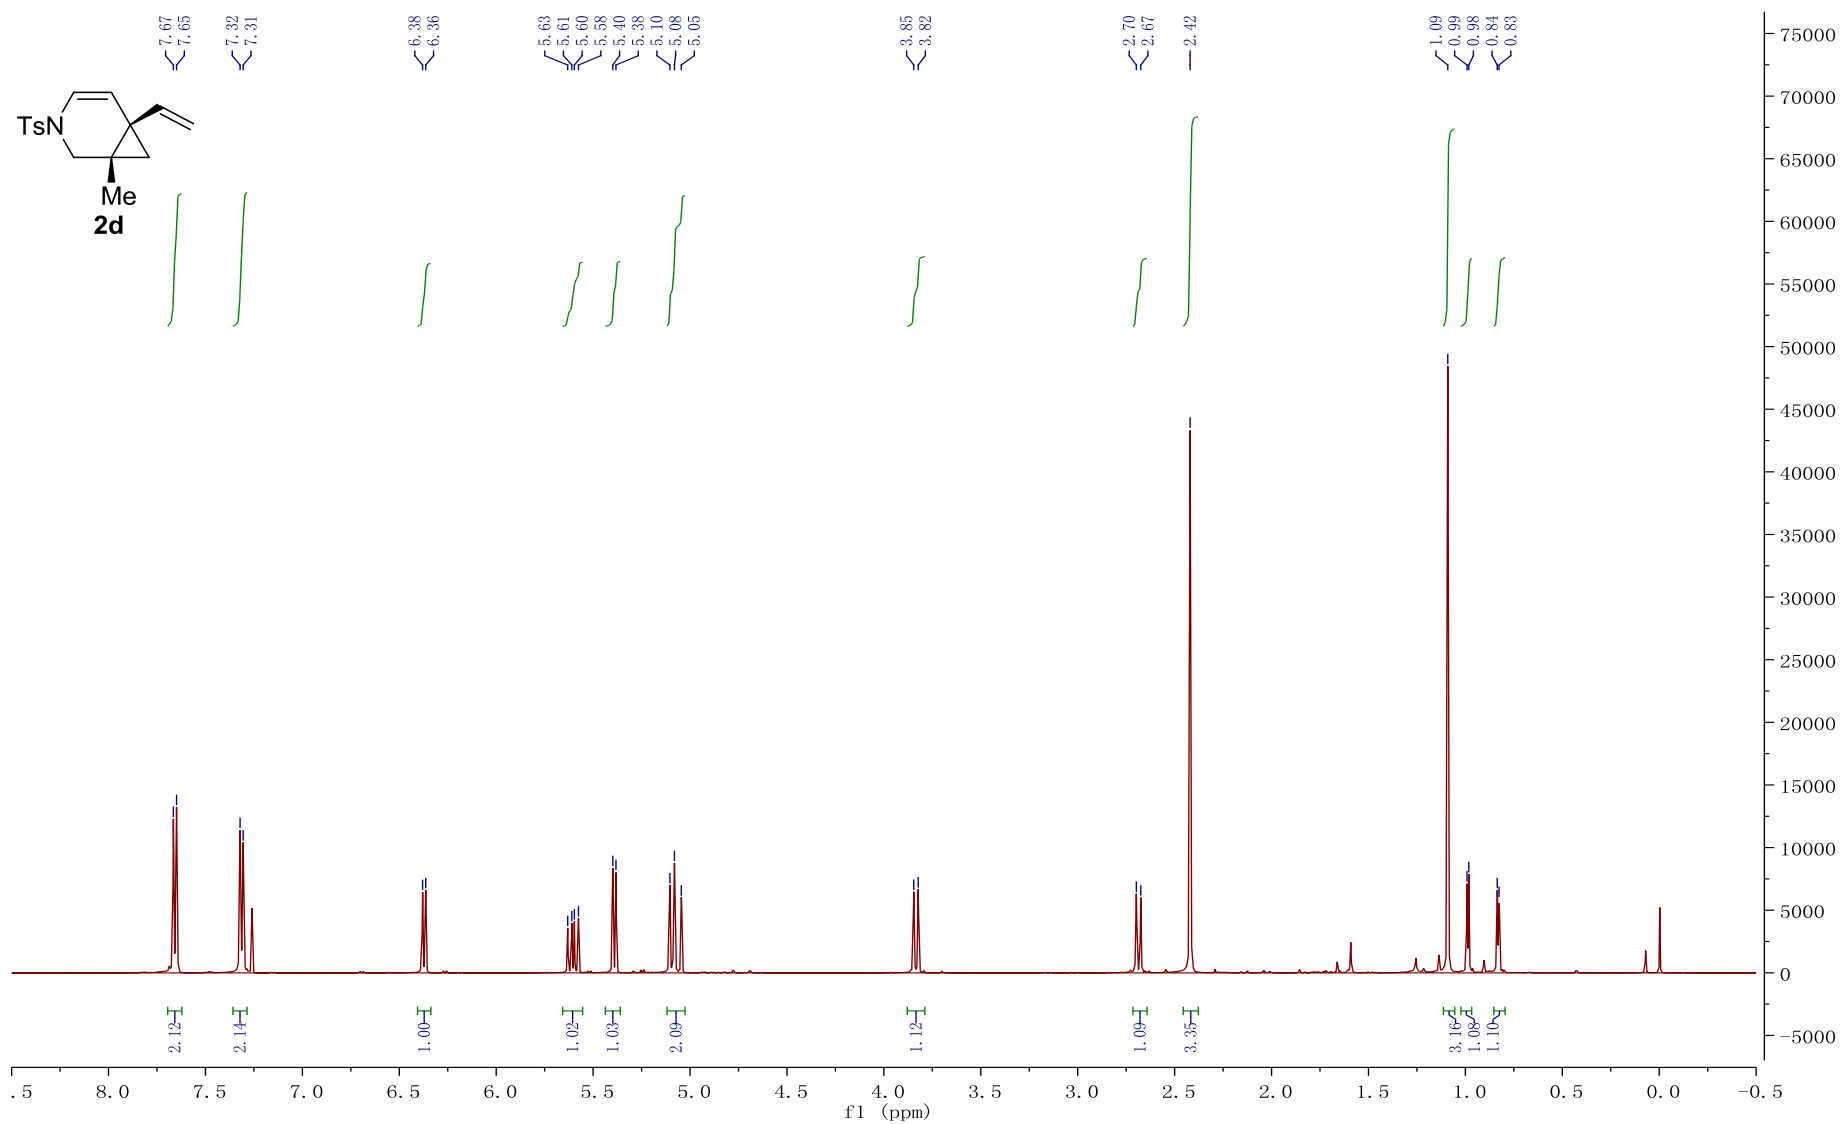

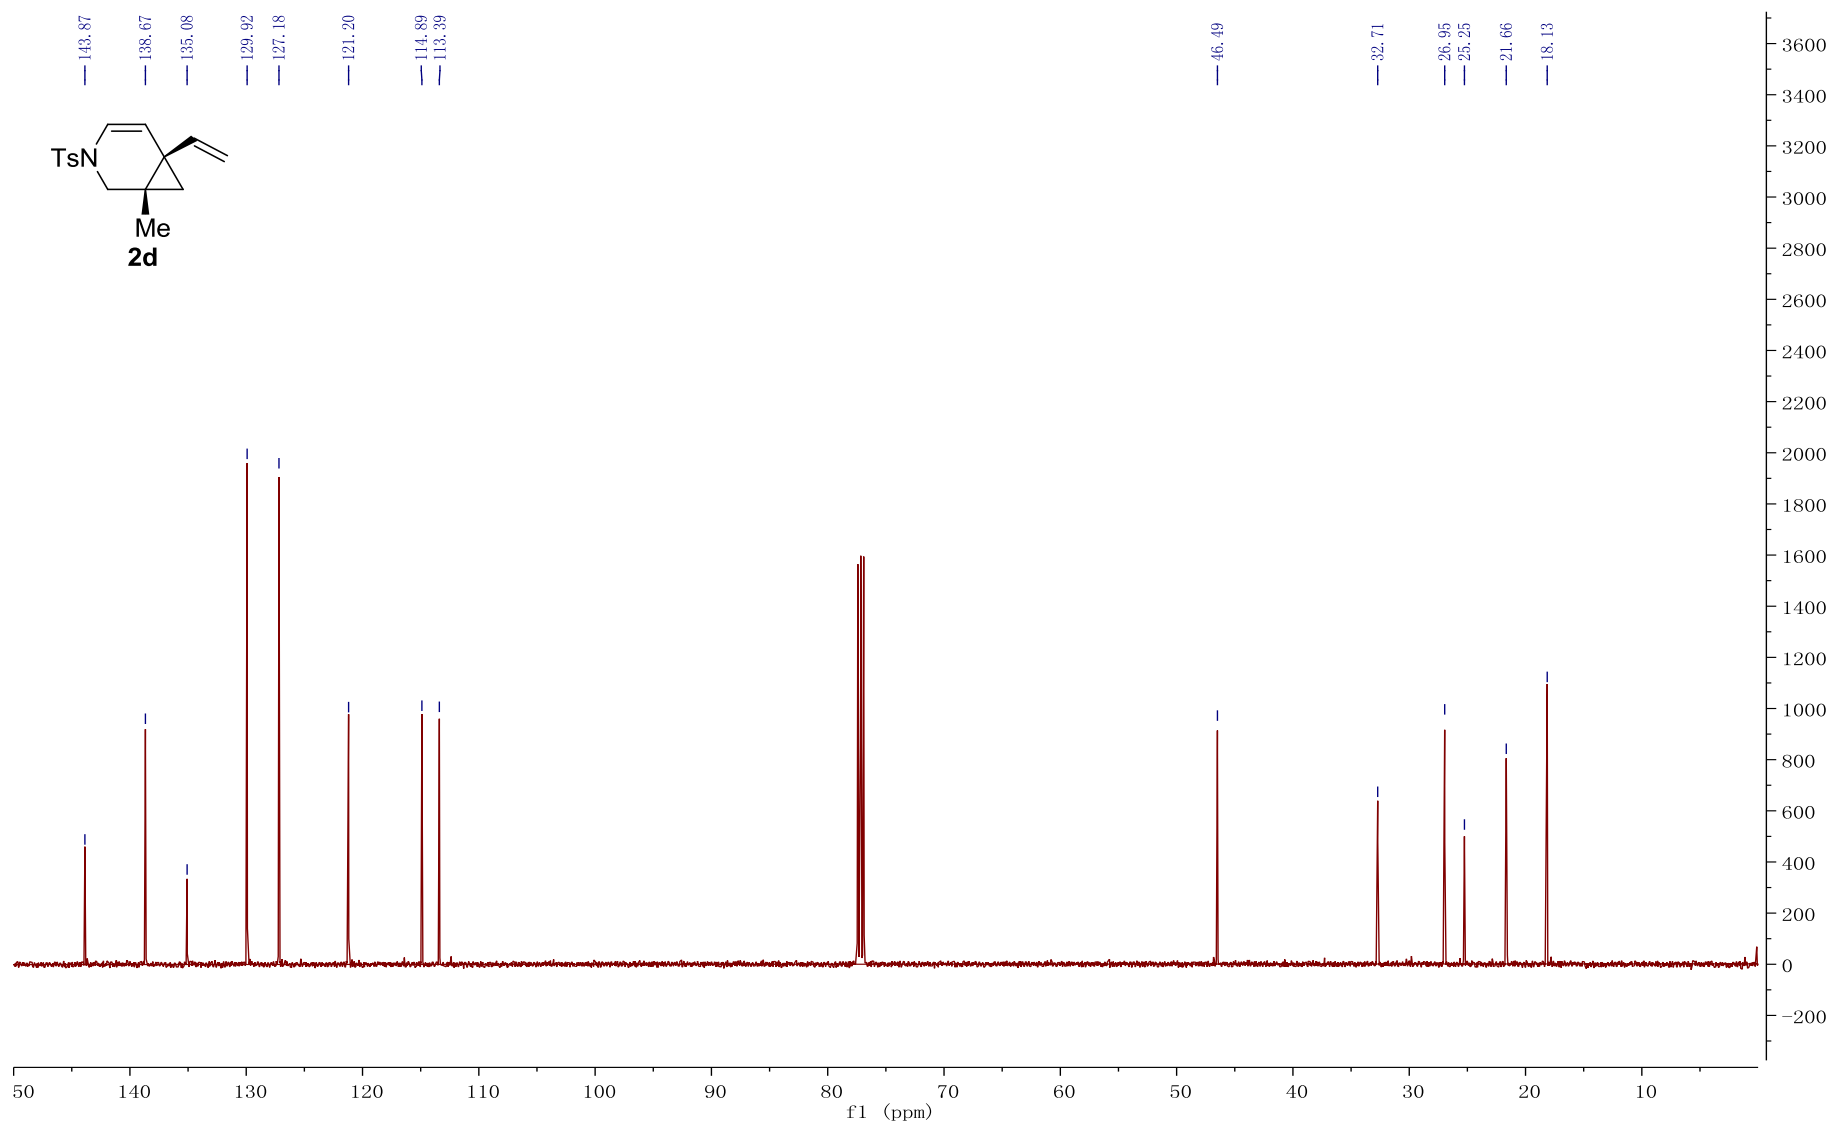

S89

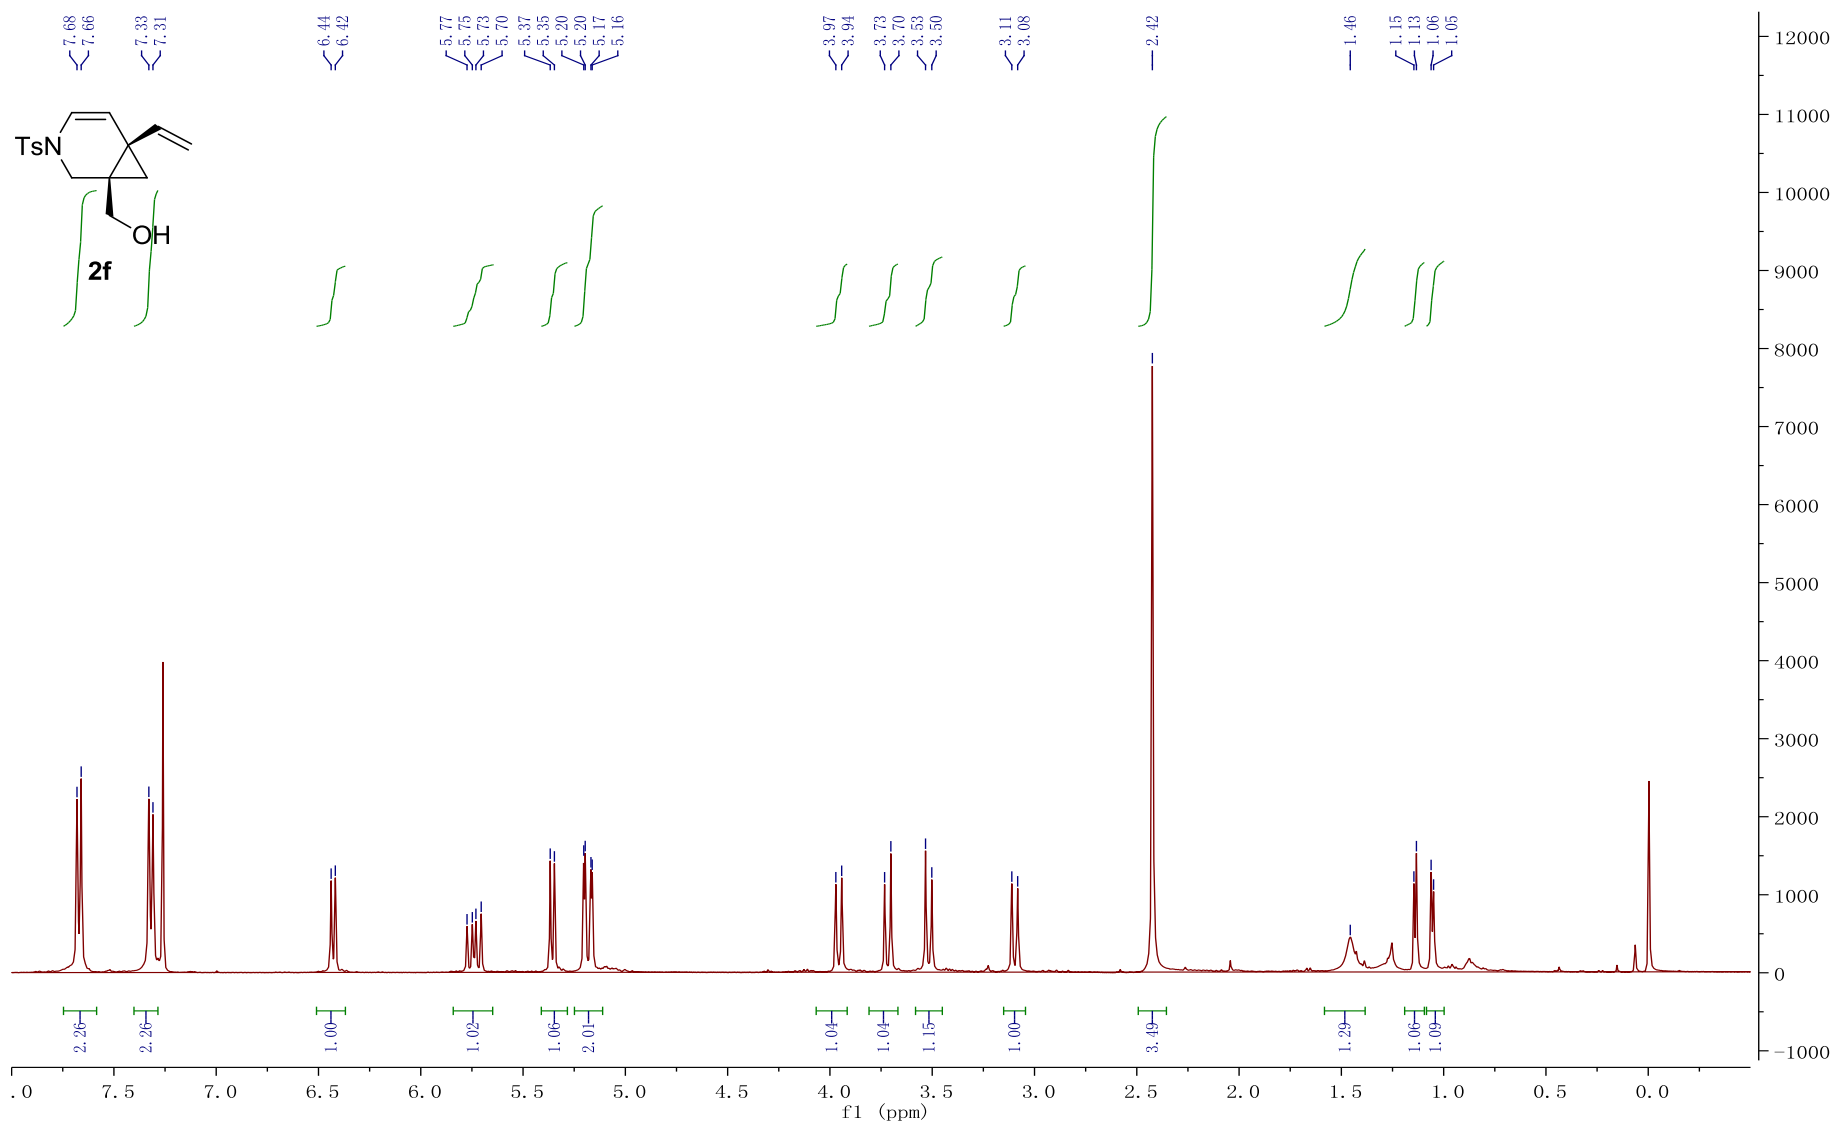

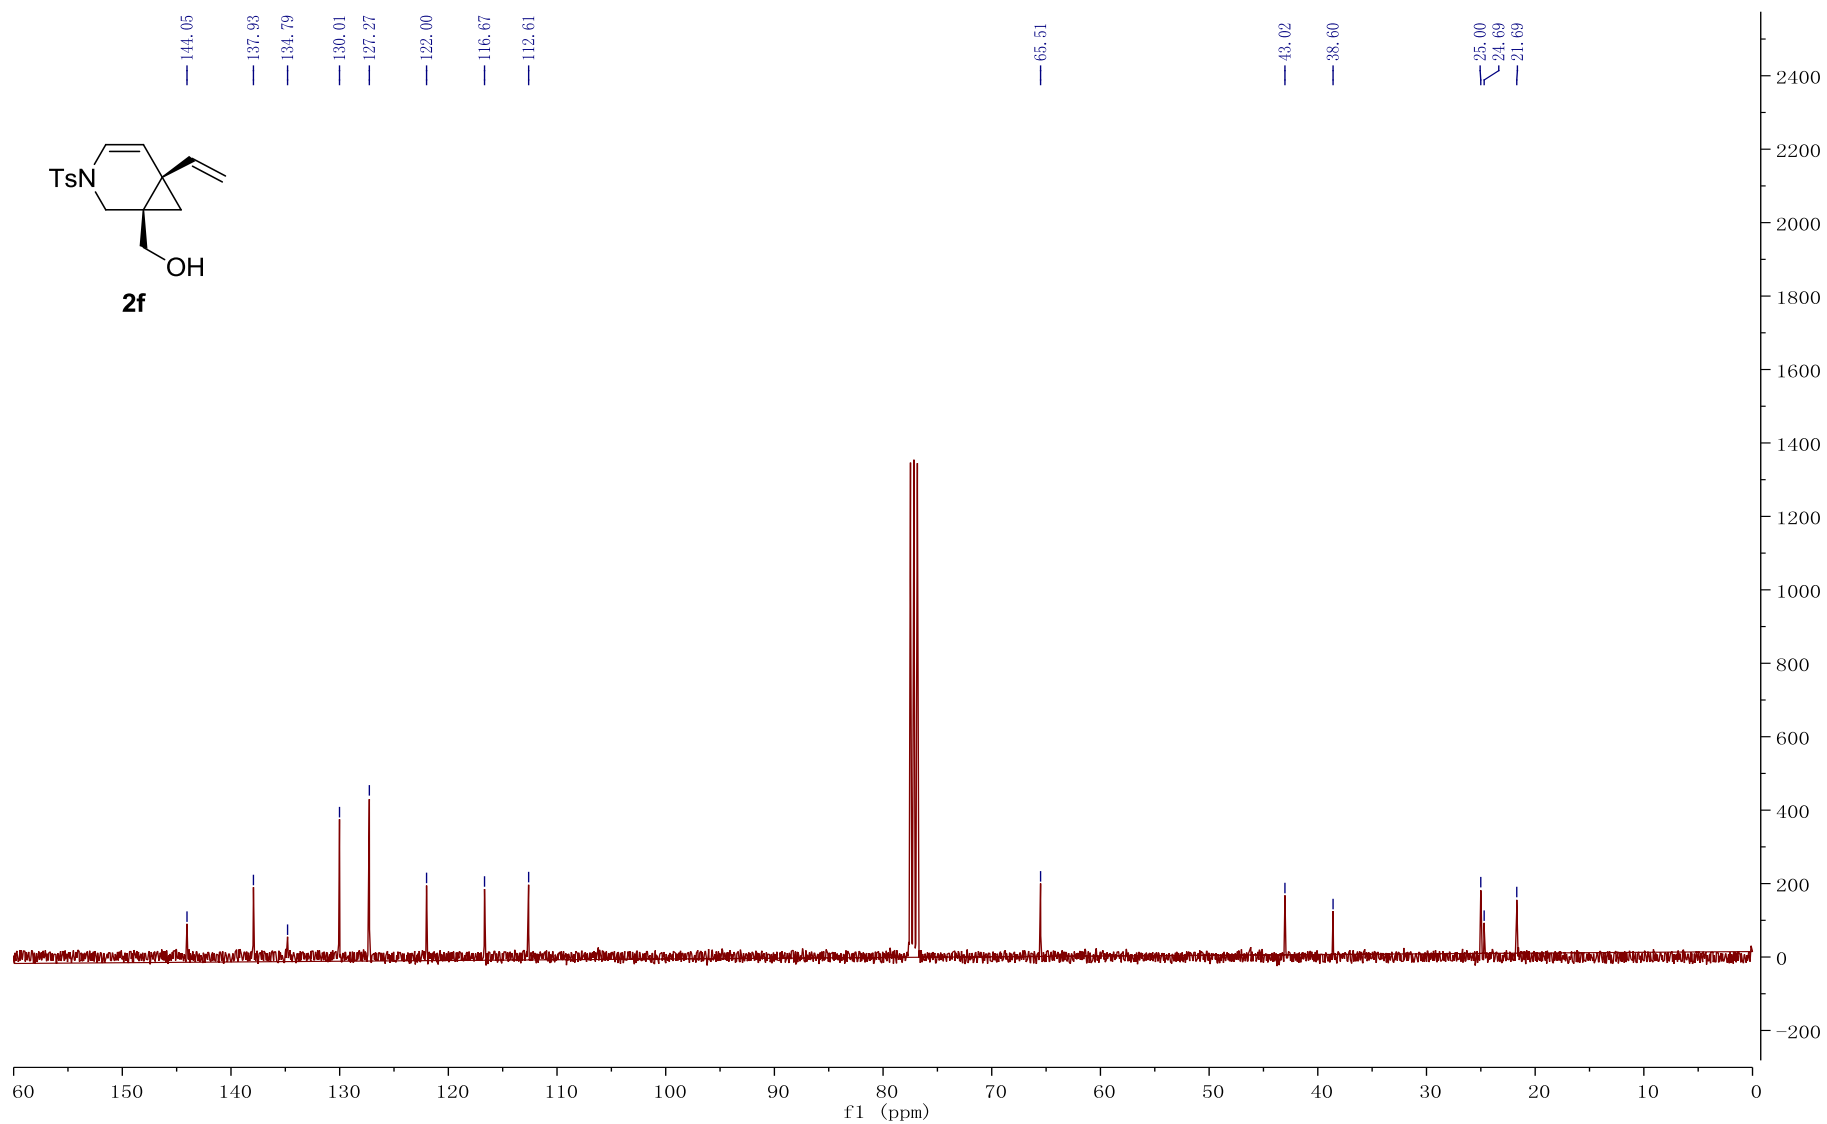

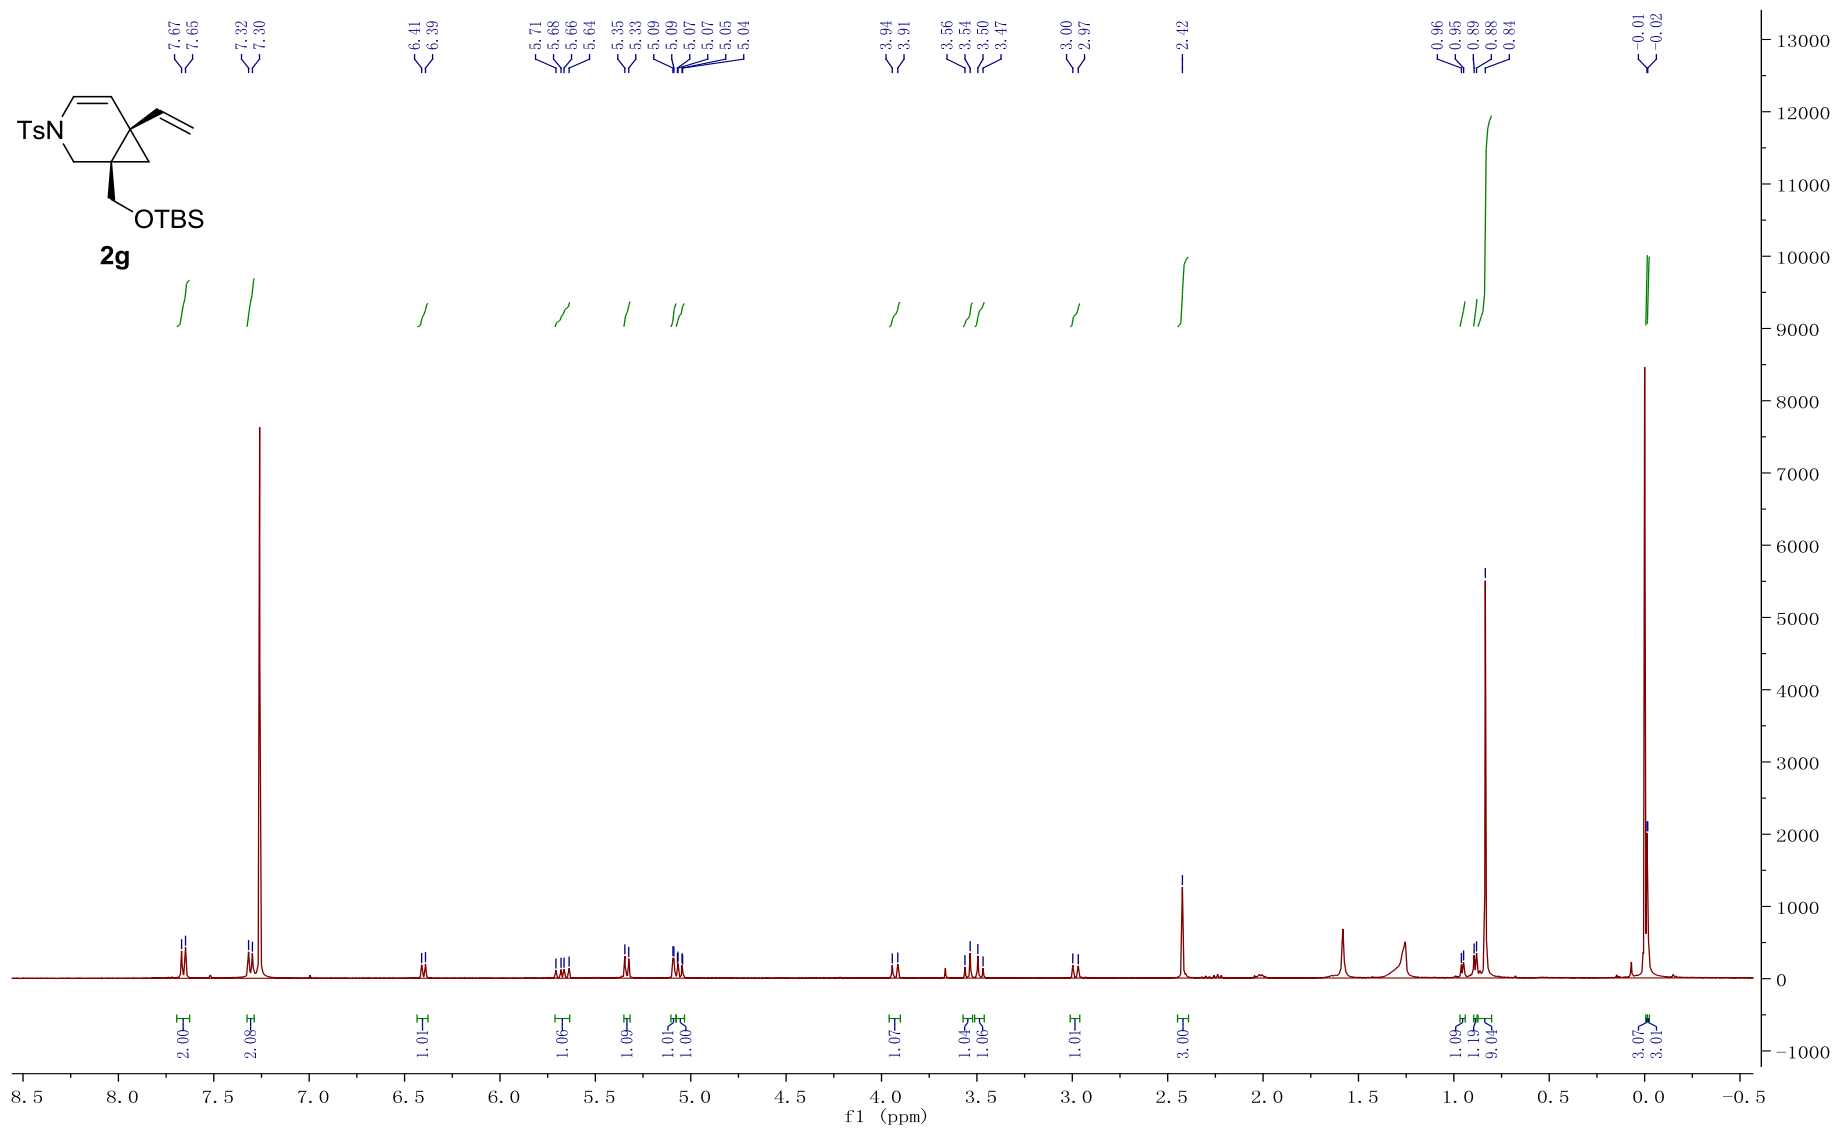

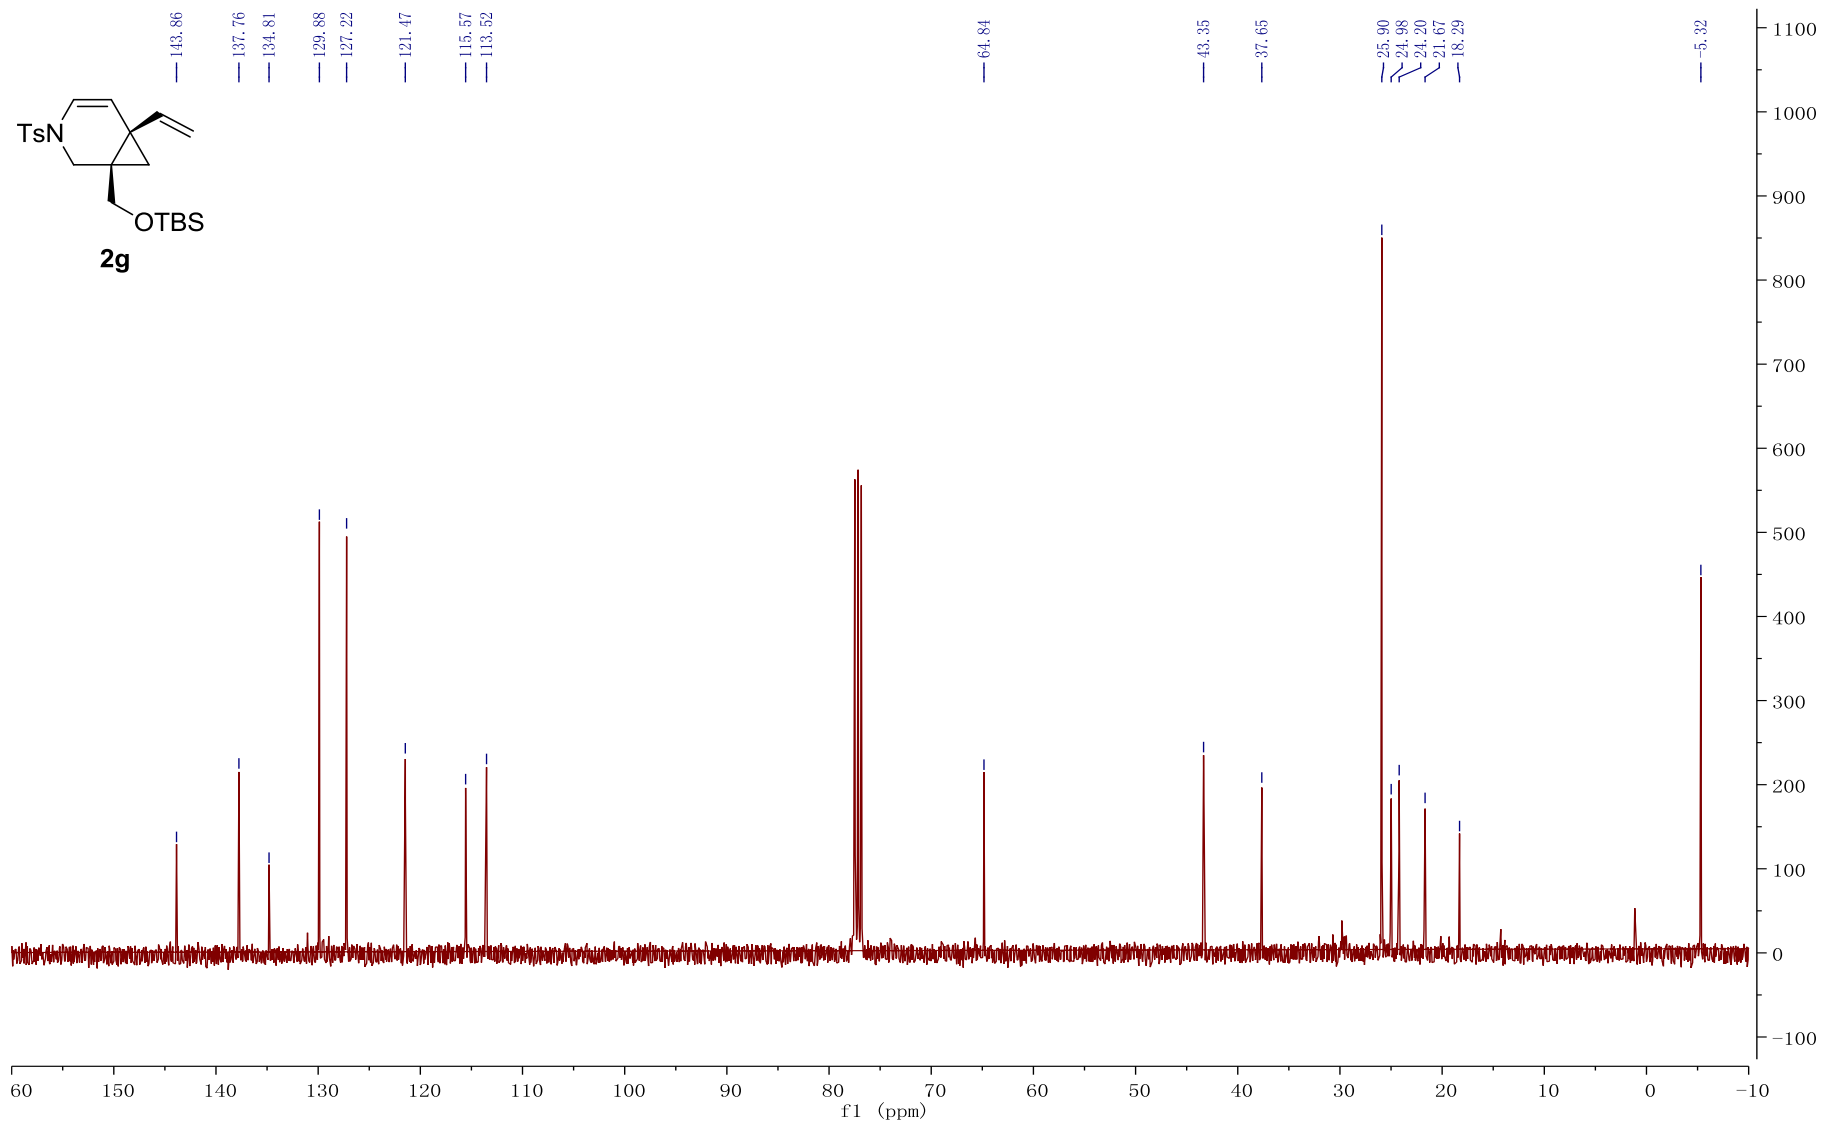

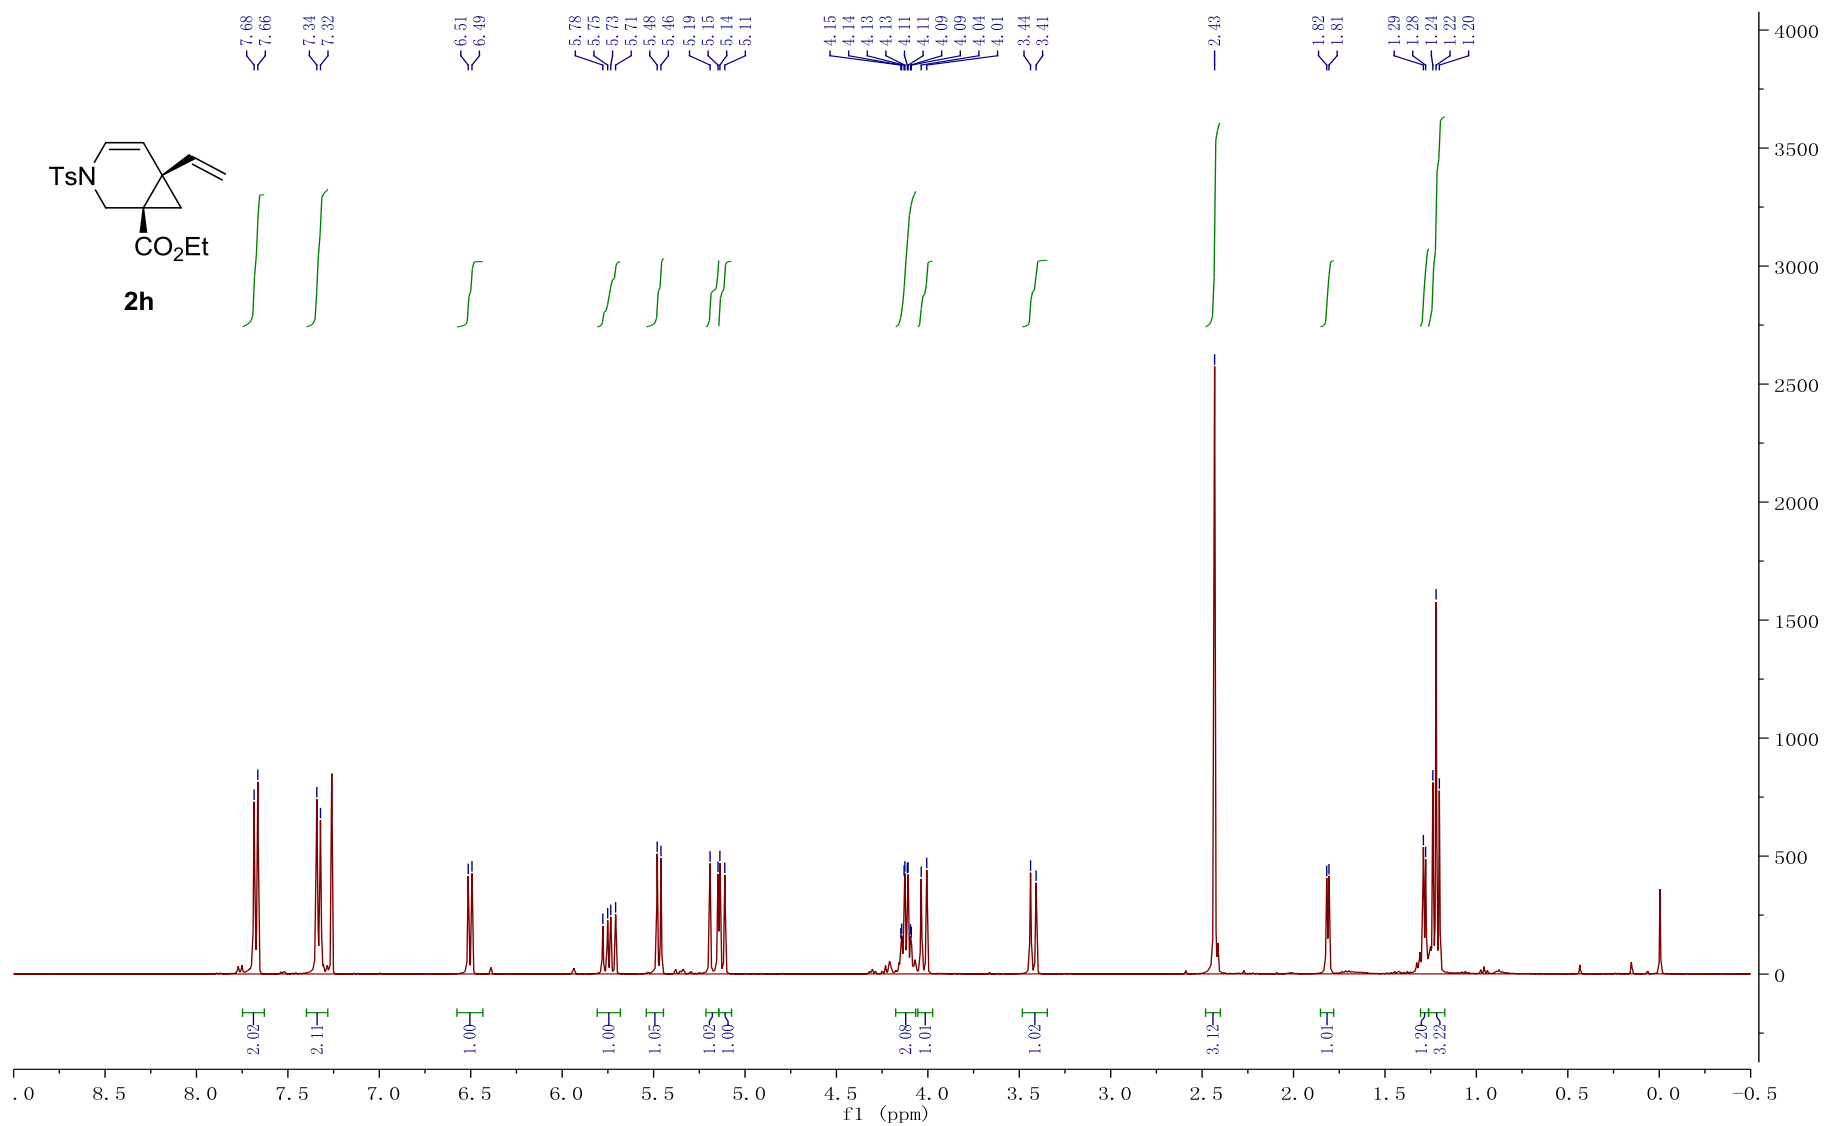

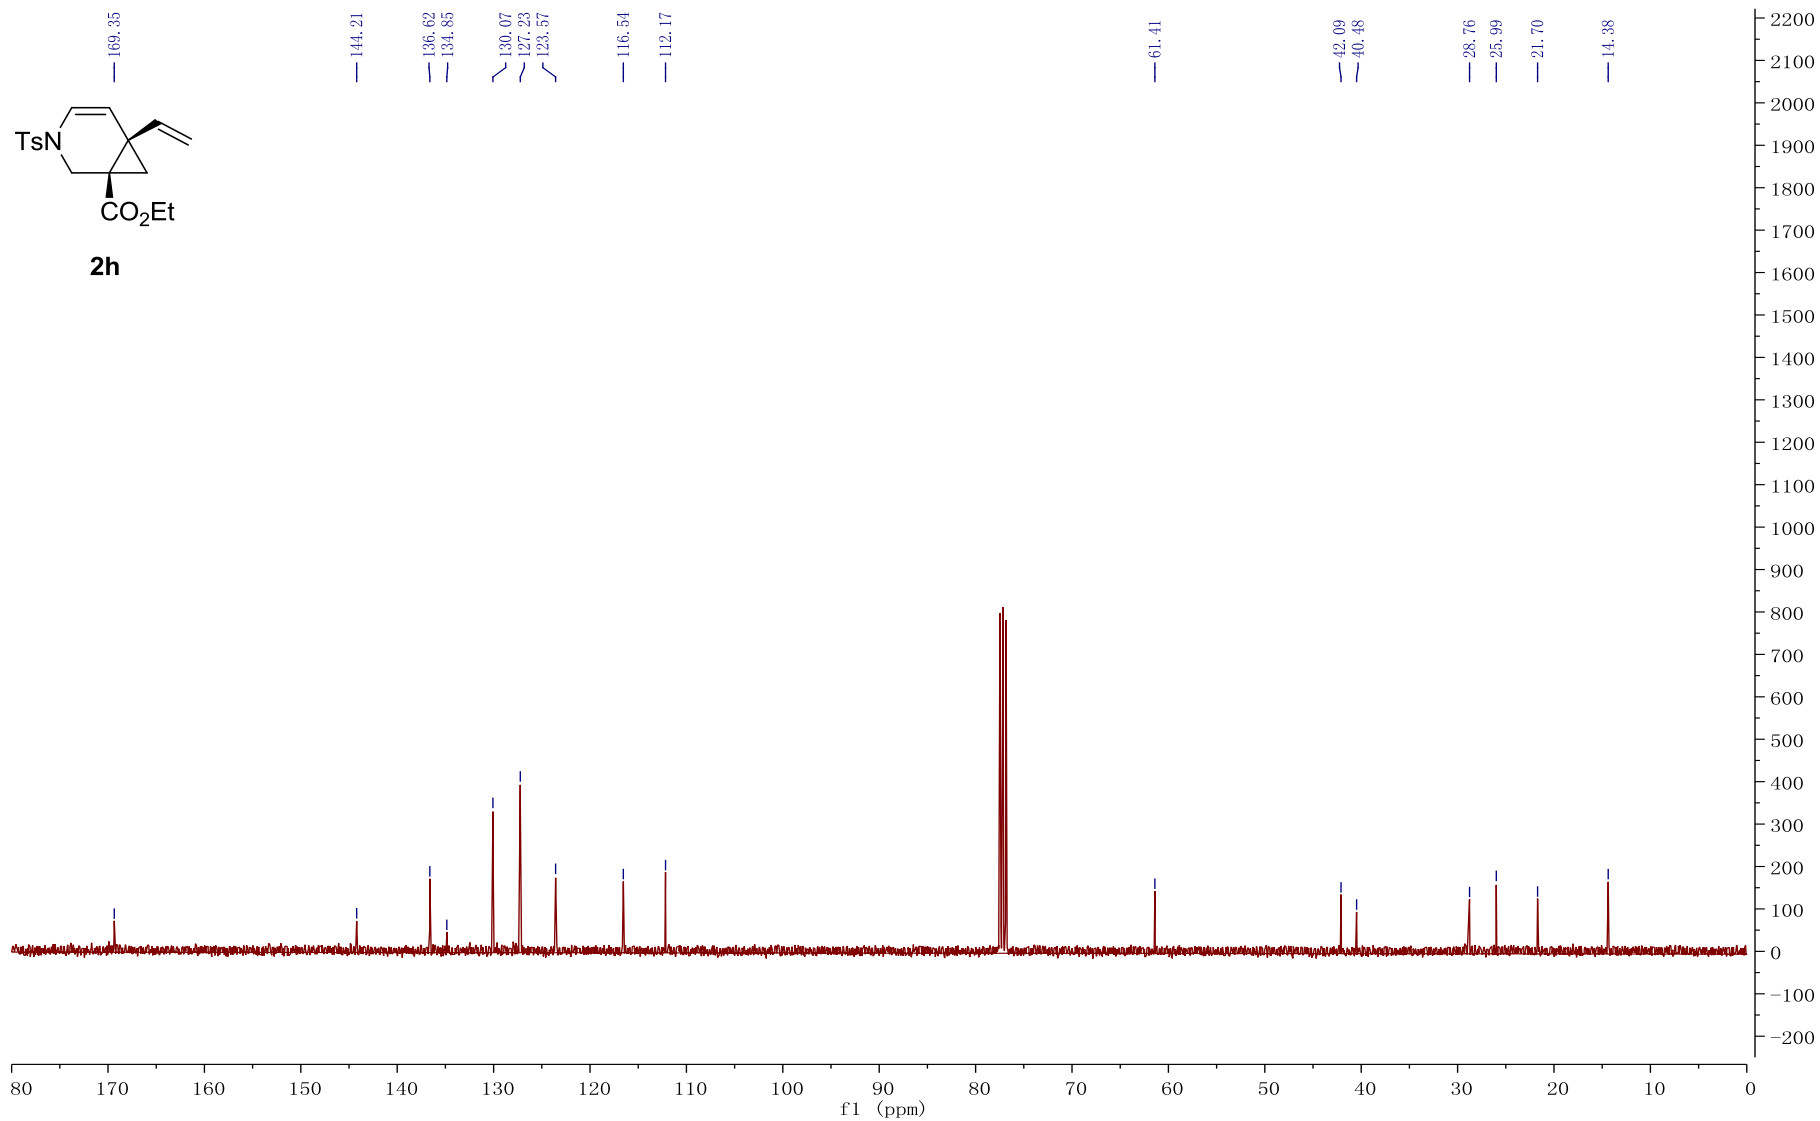

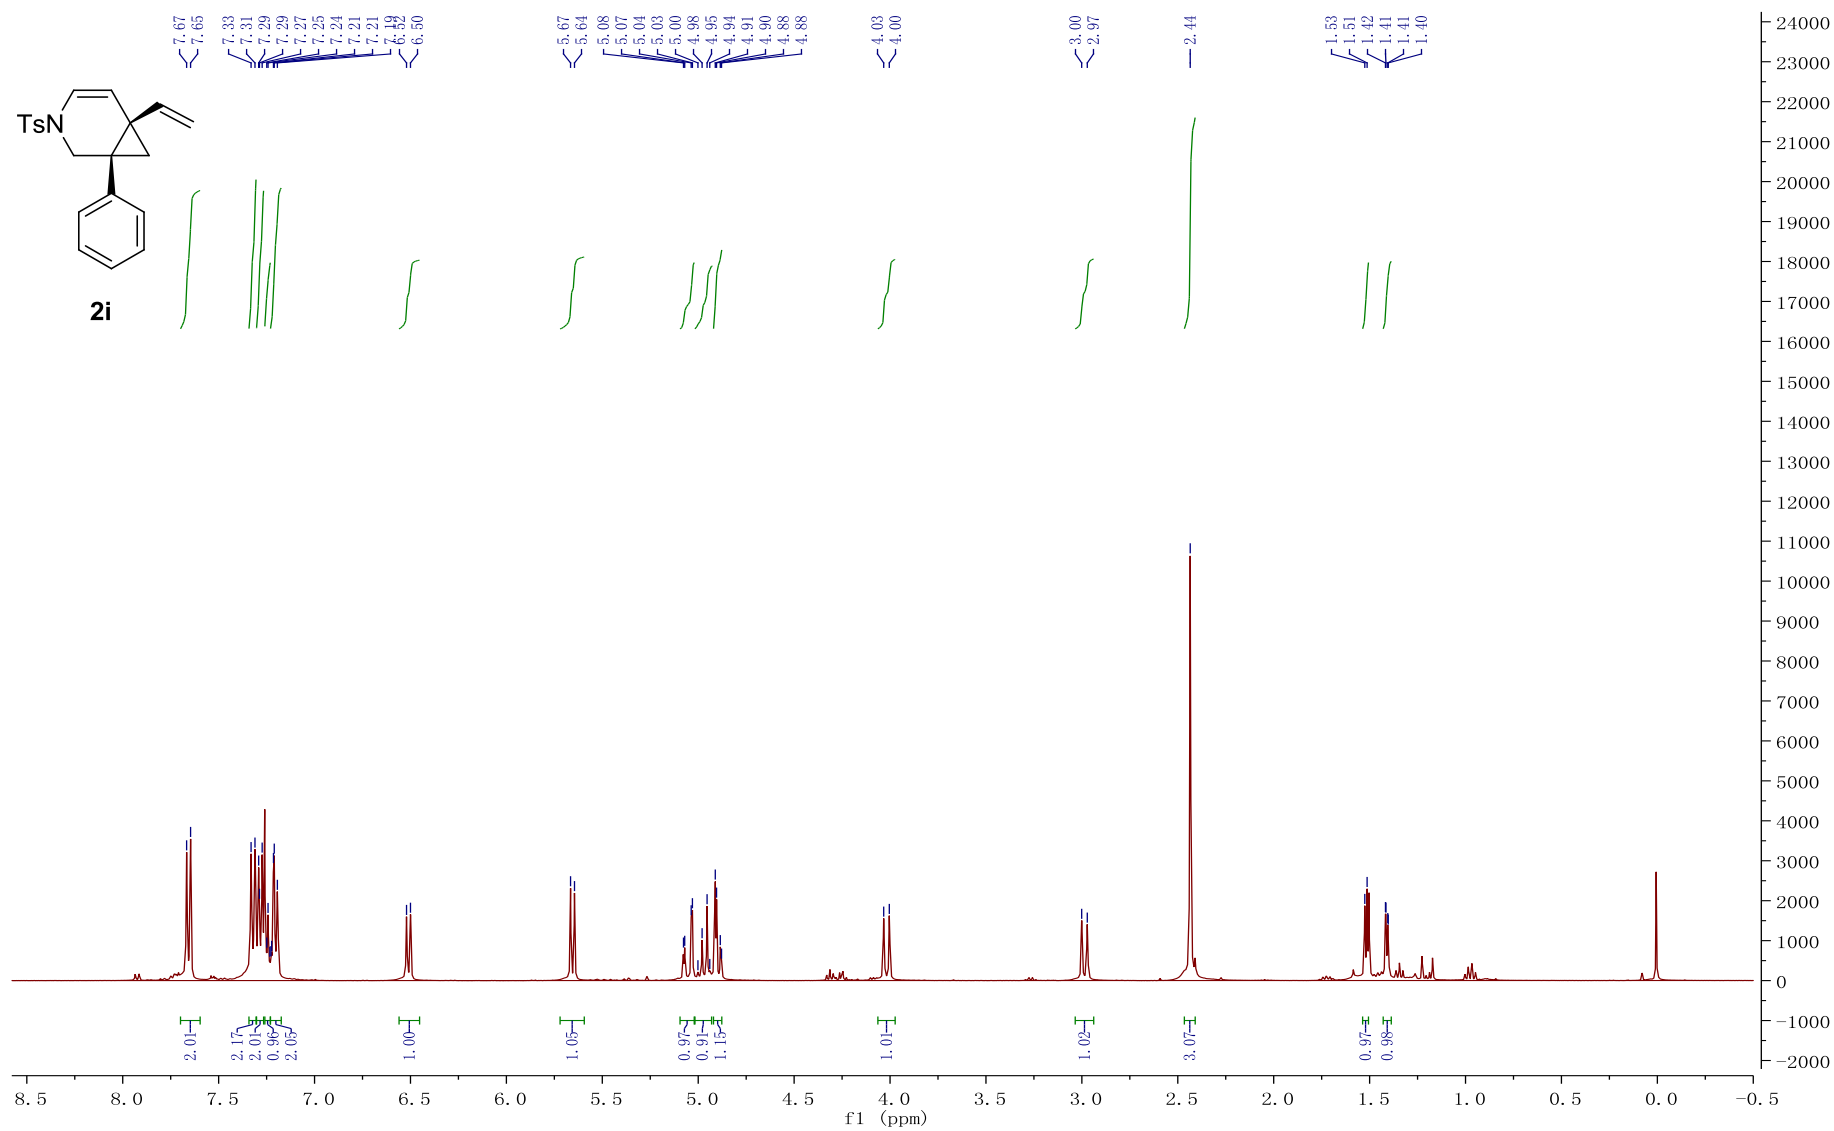

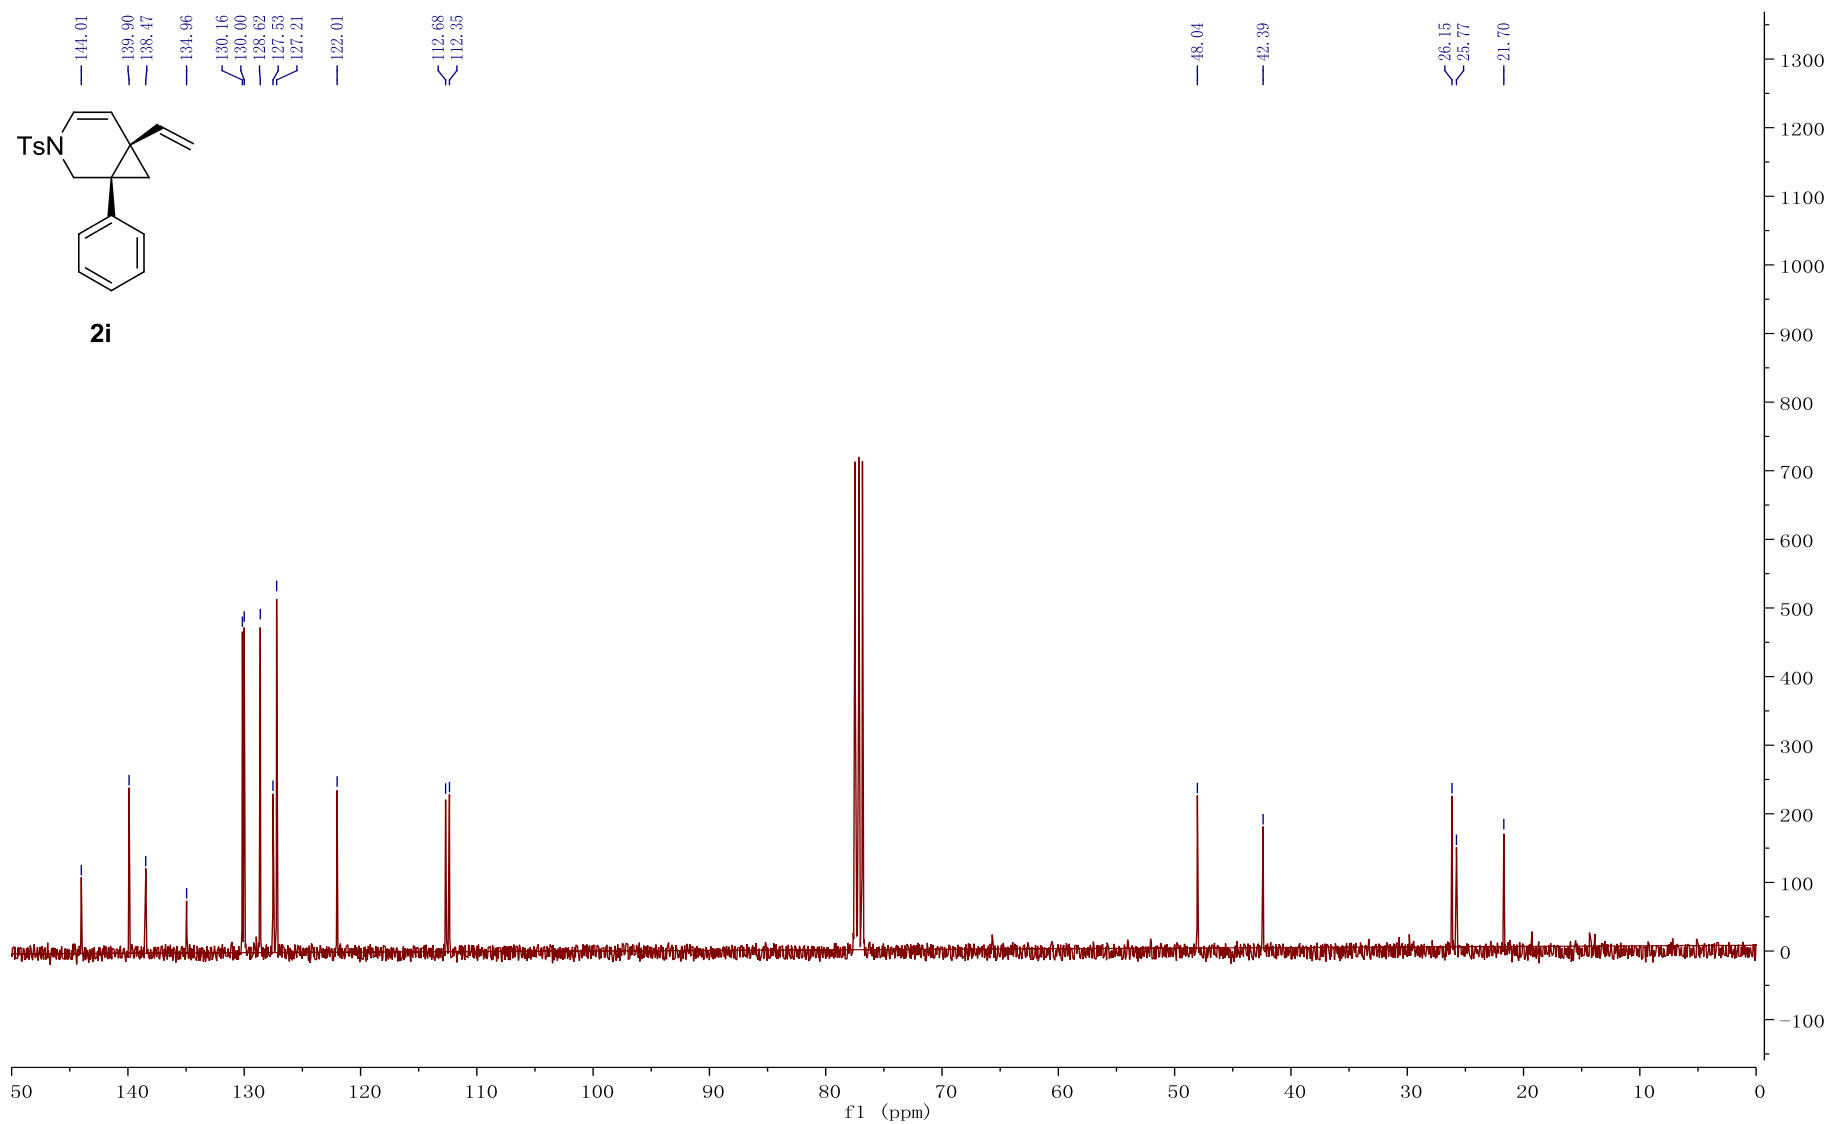

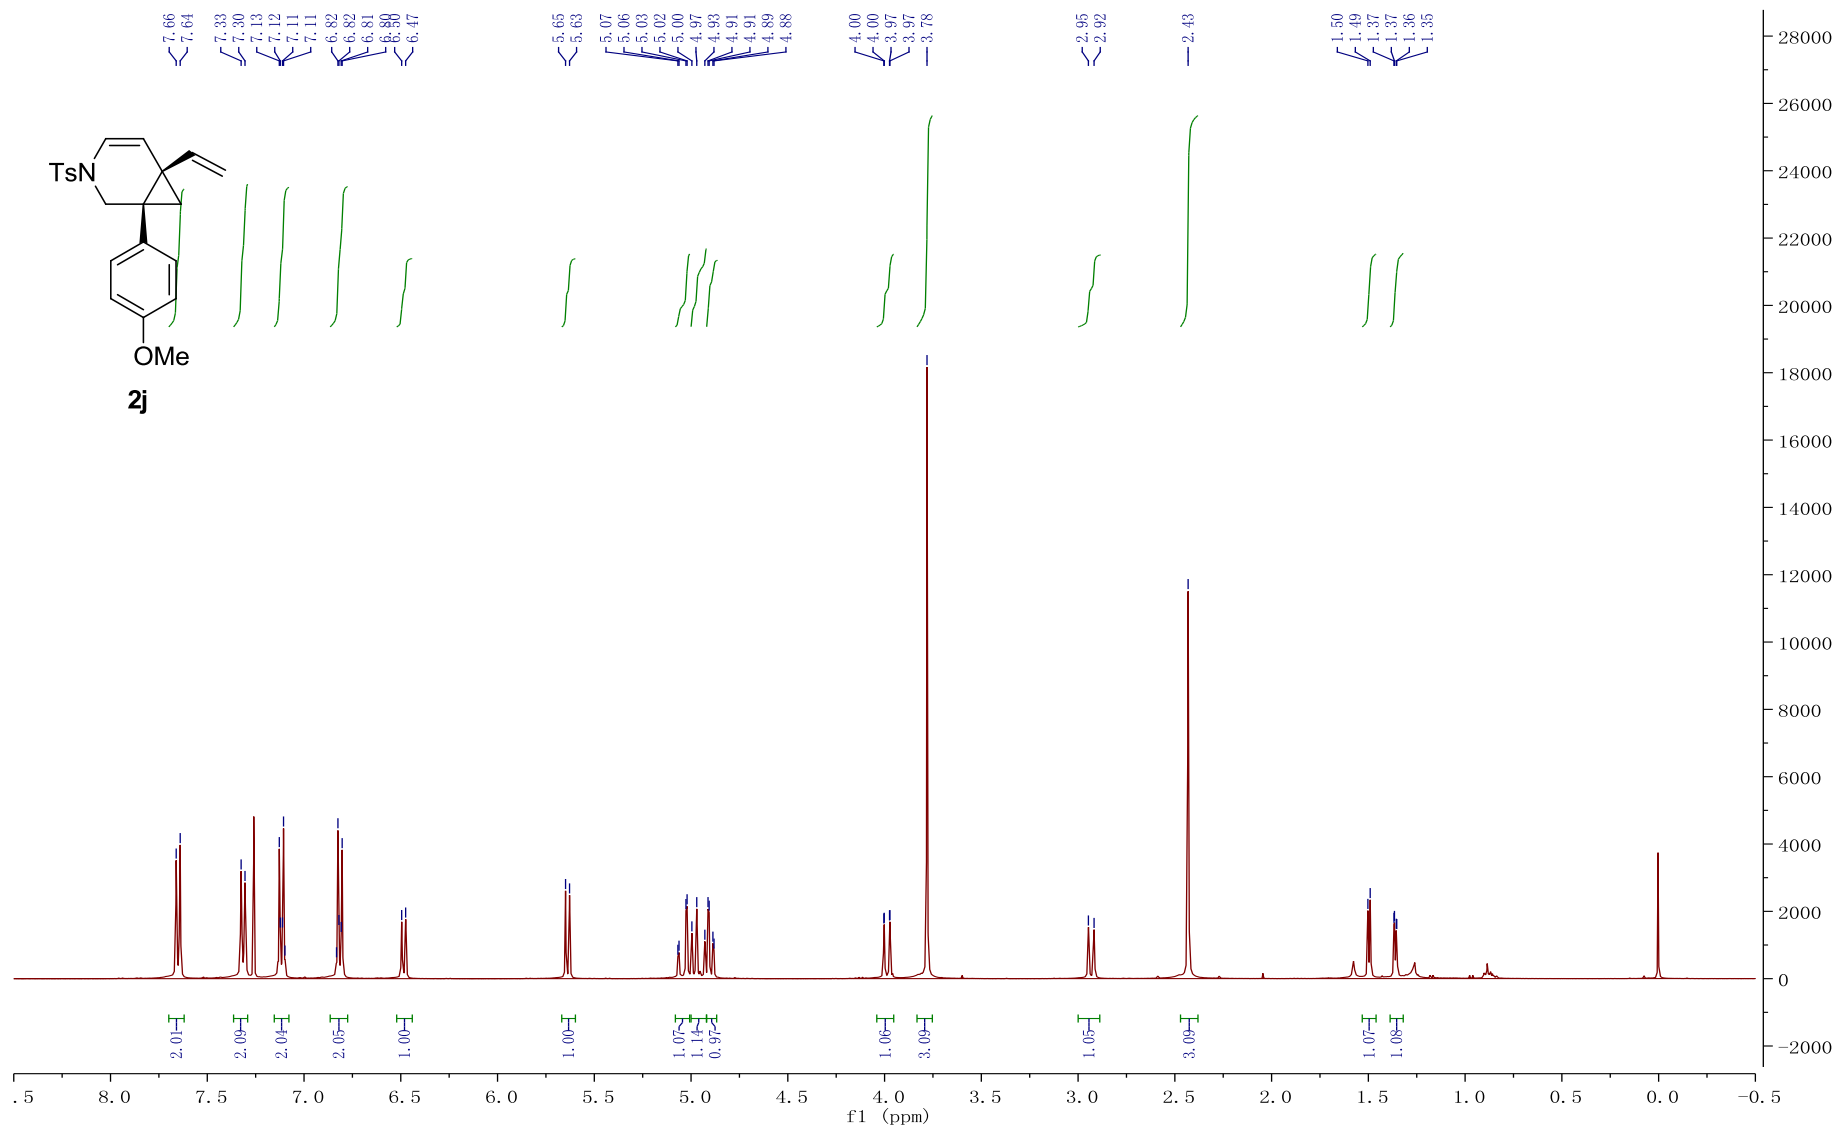

S98

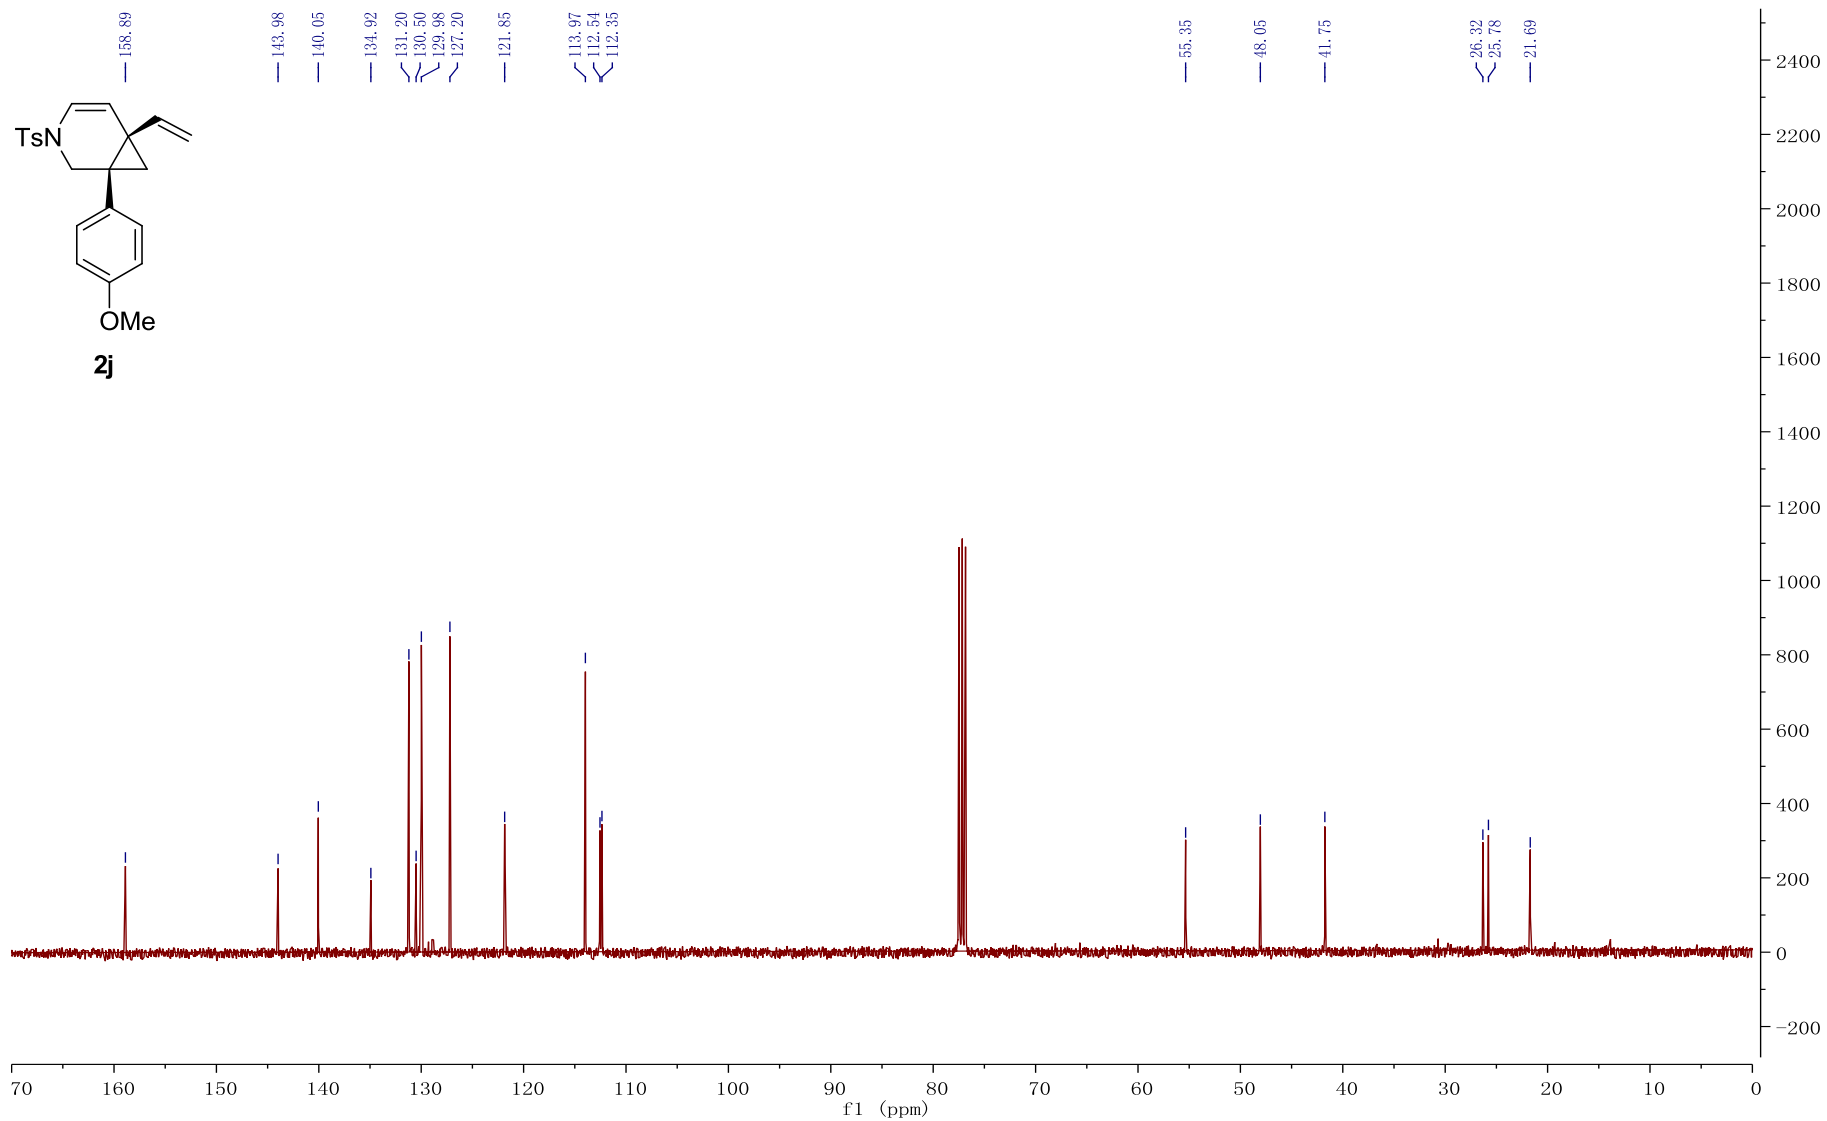

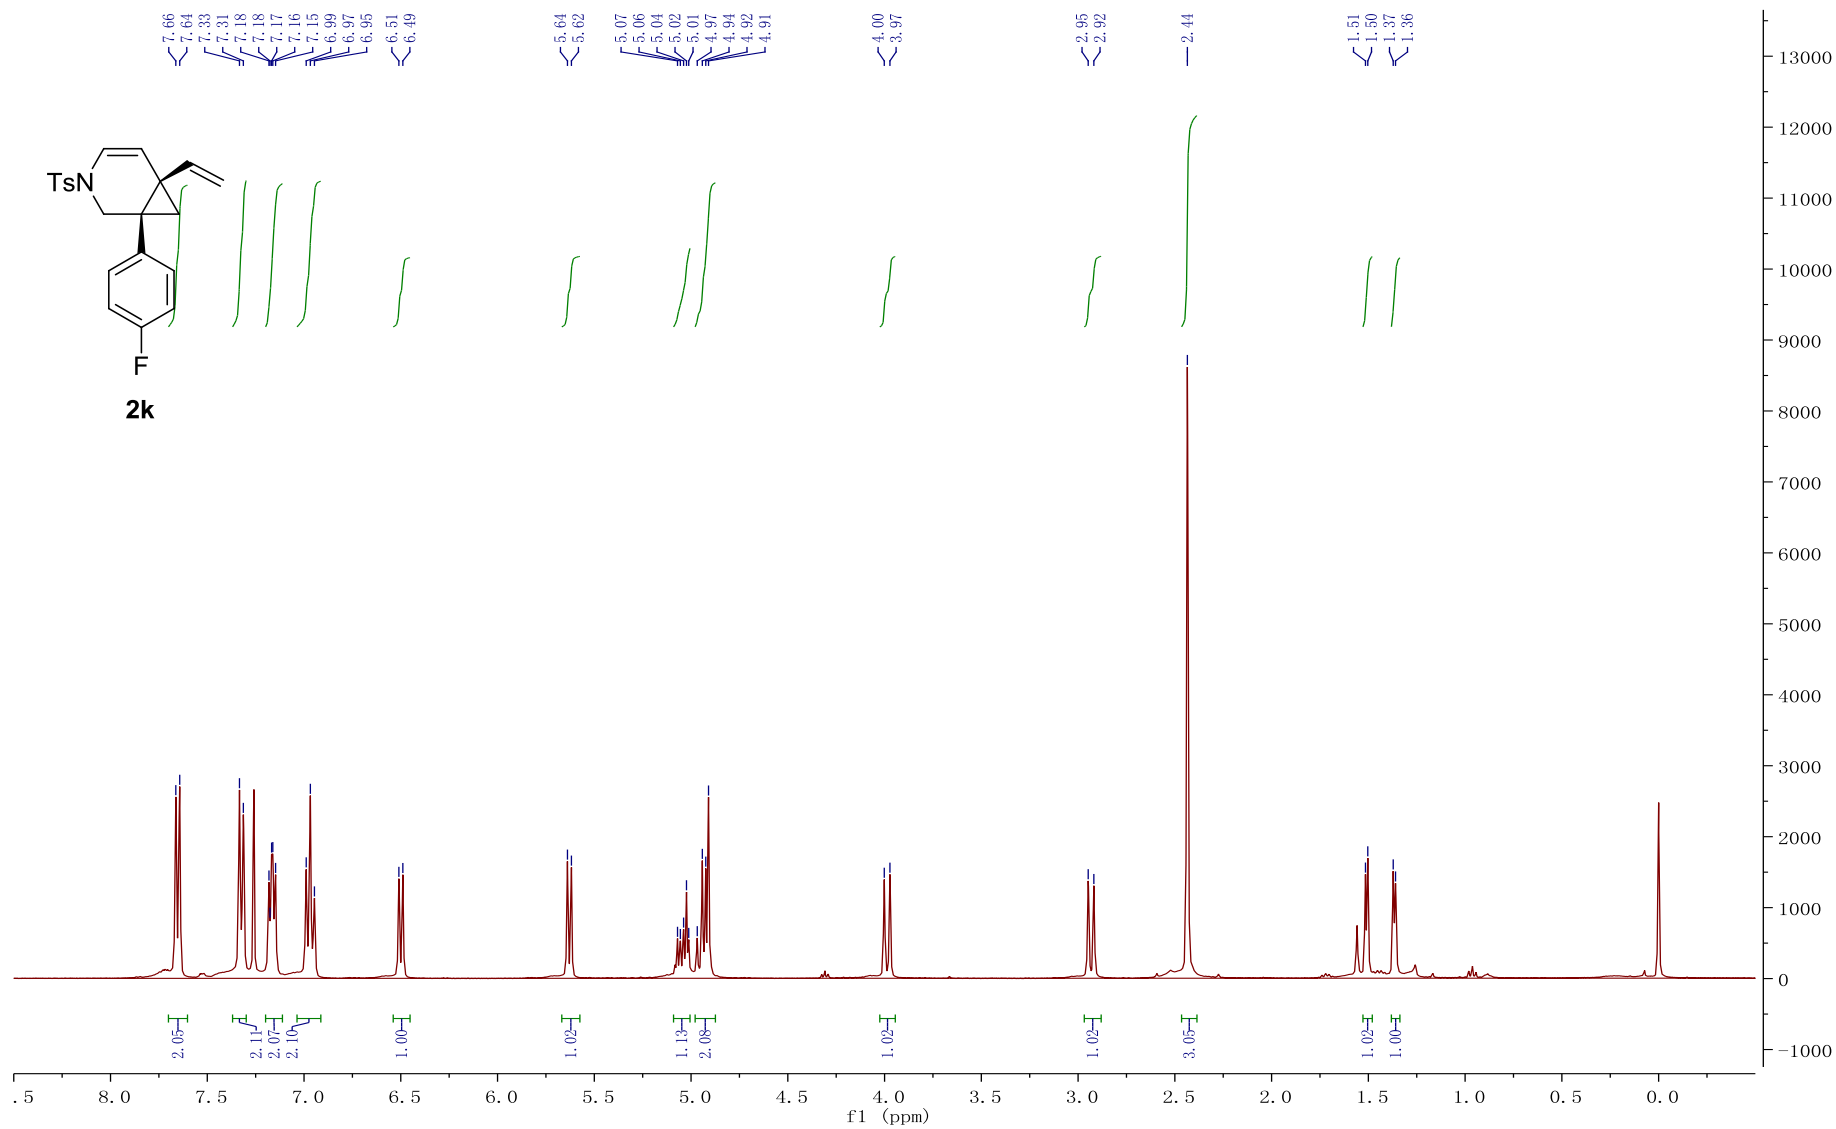

S100

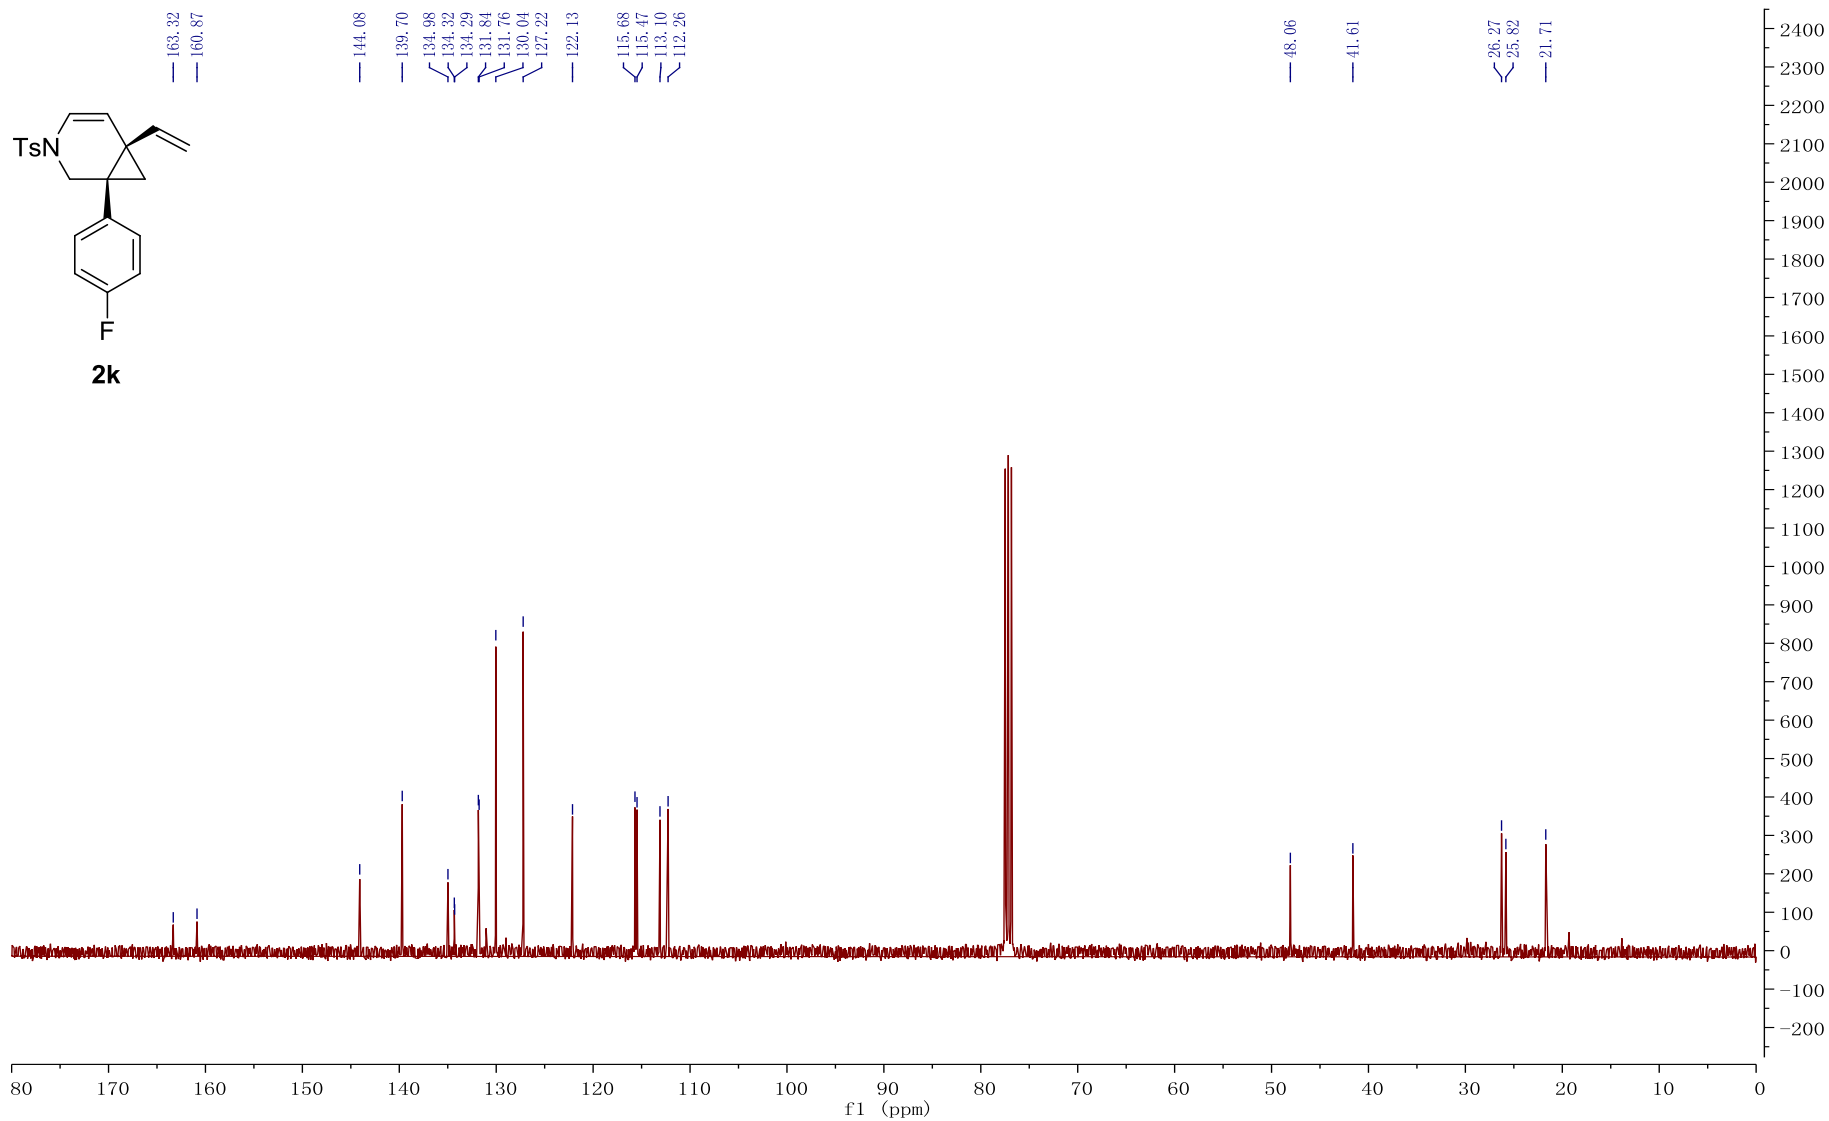

S101

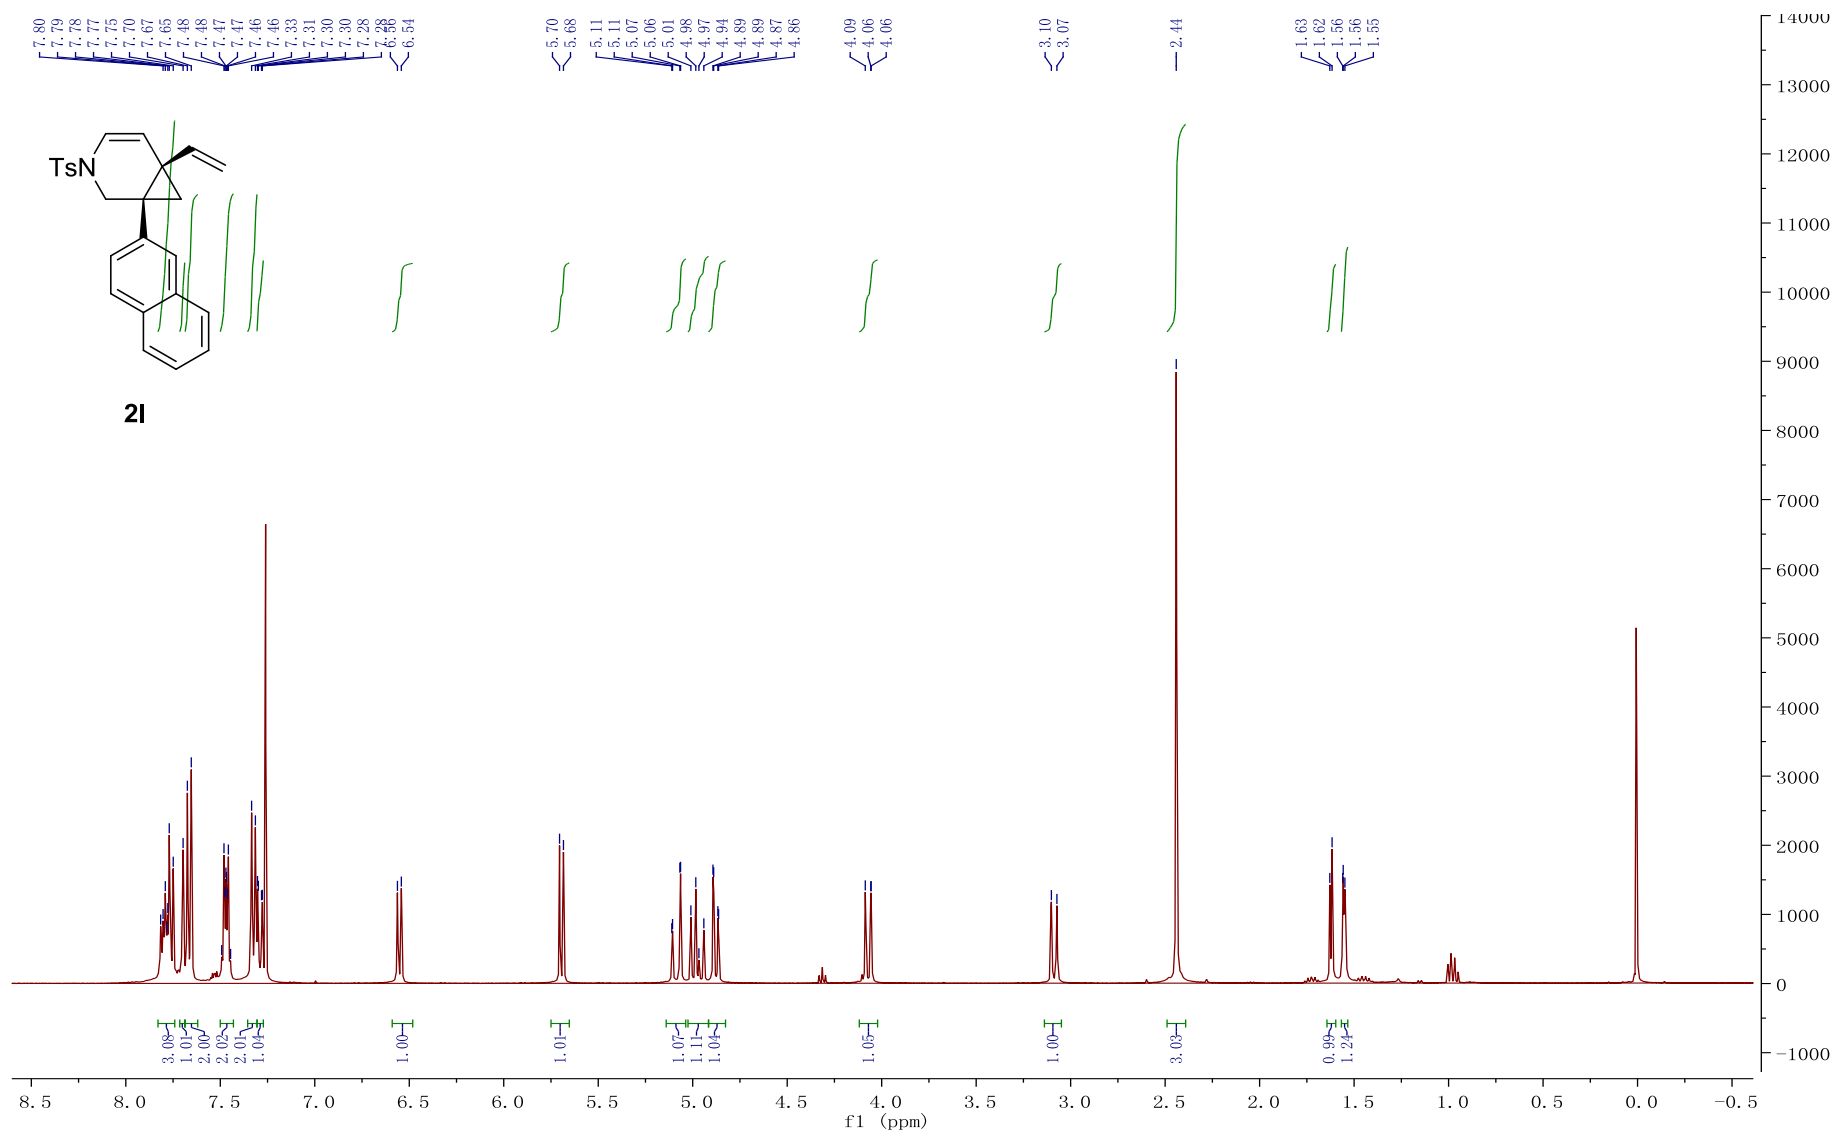

S102

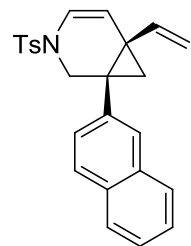

**2l**

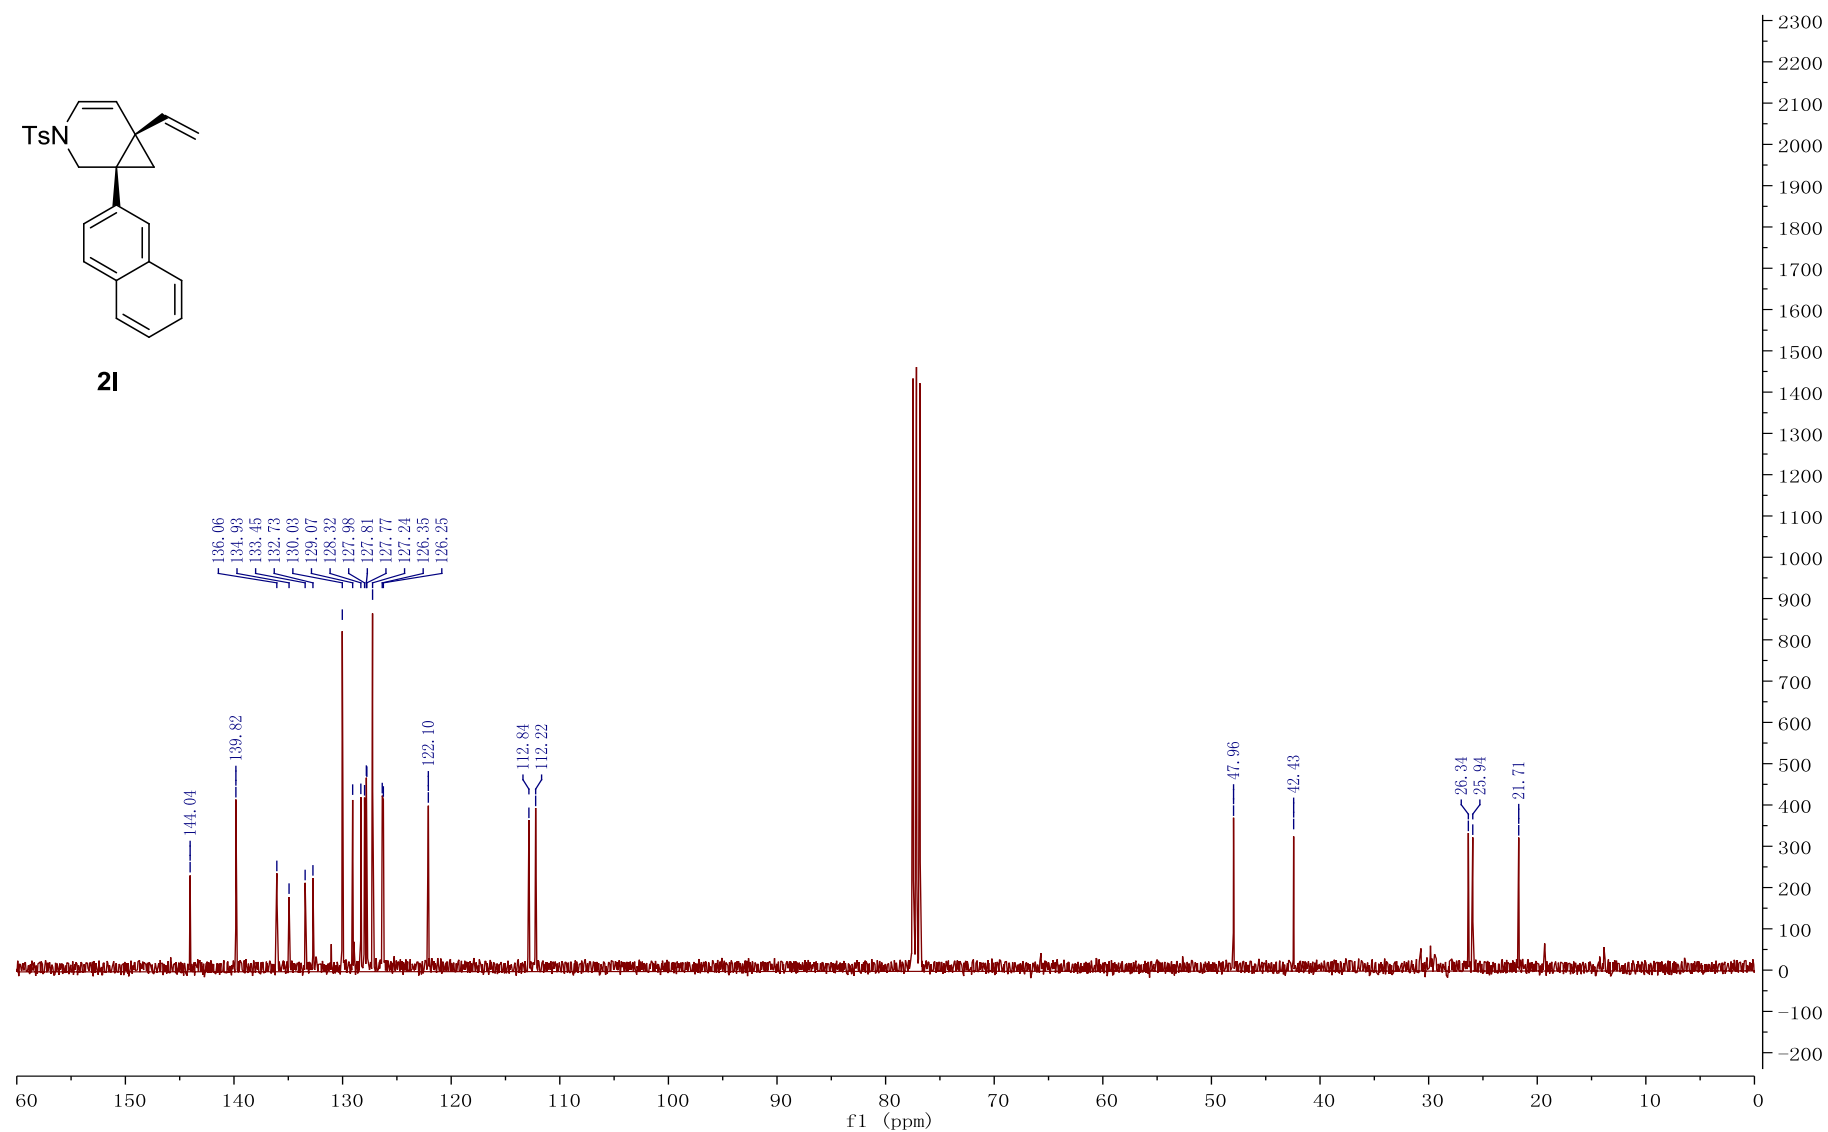

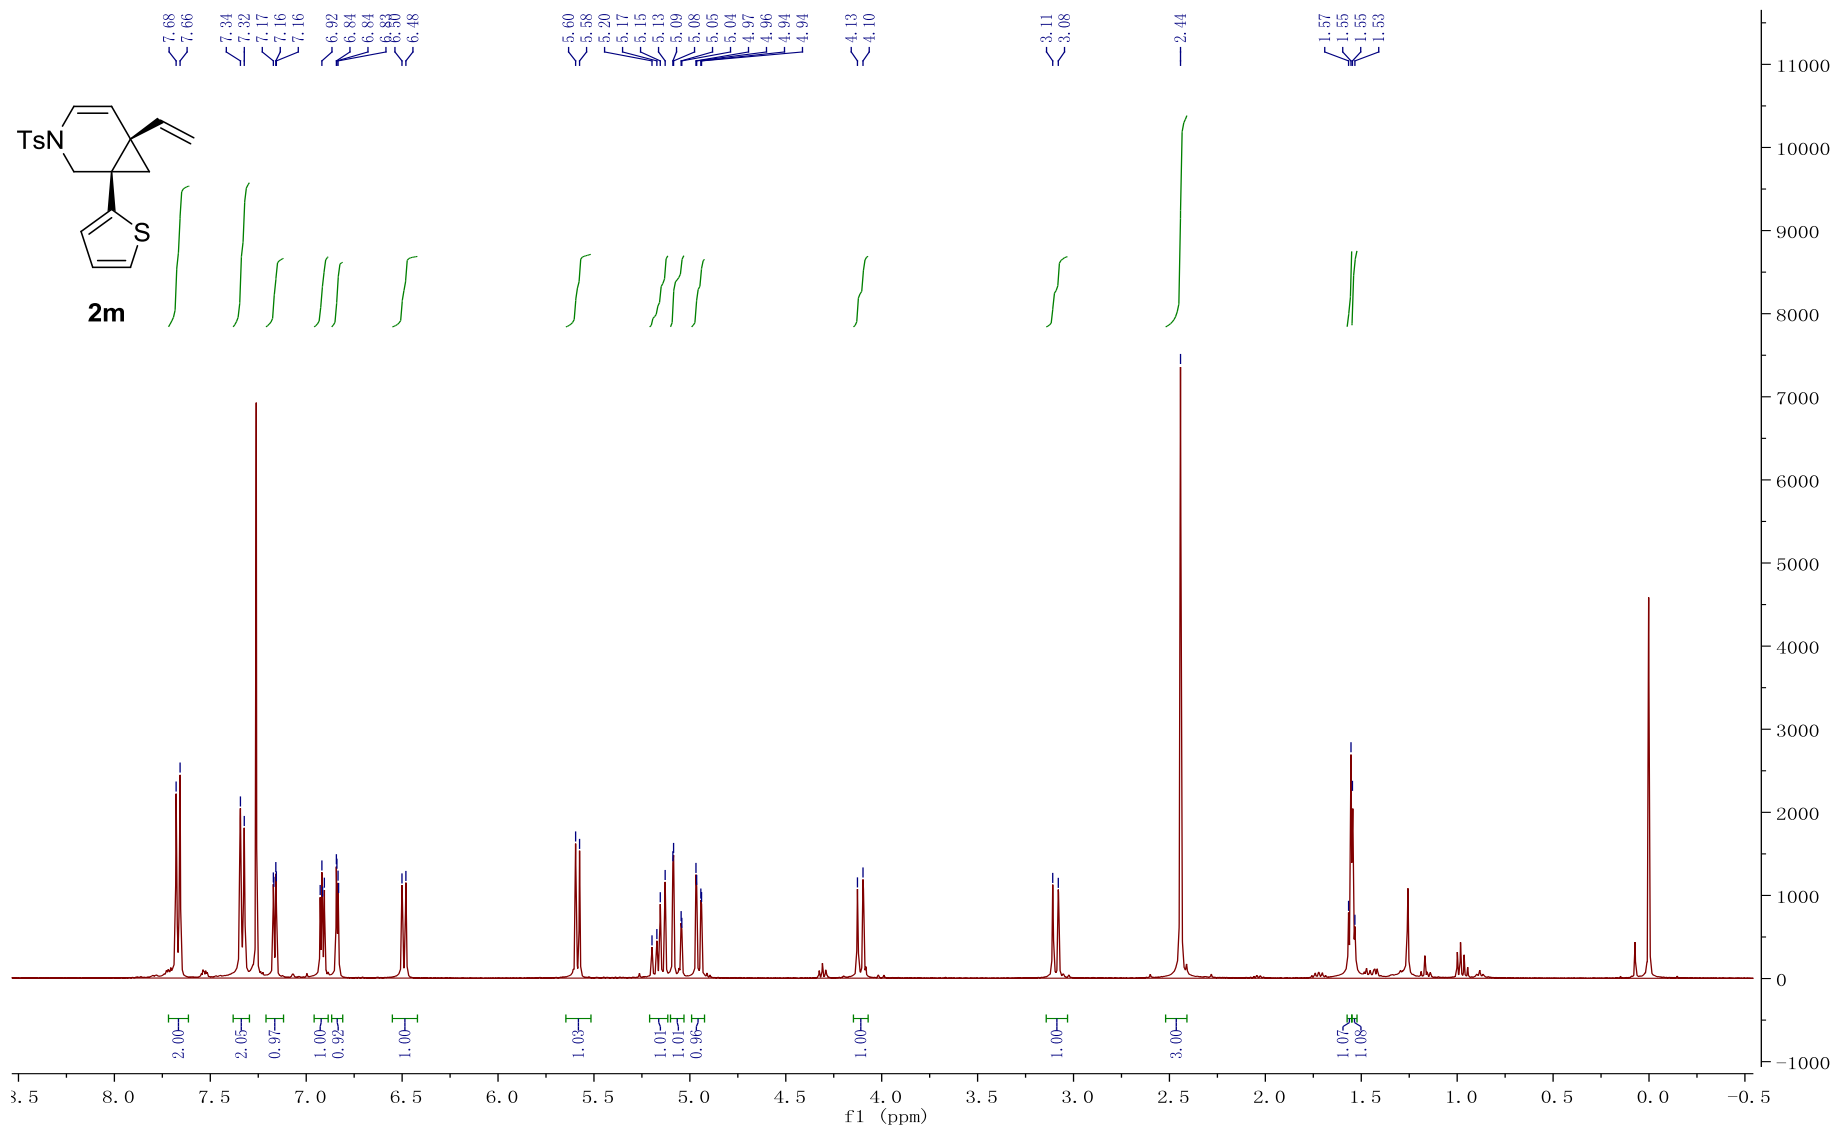

S104

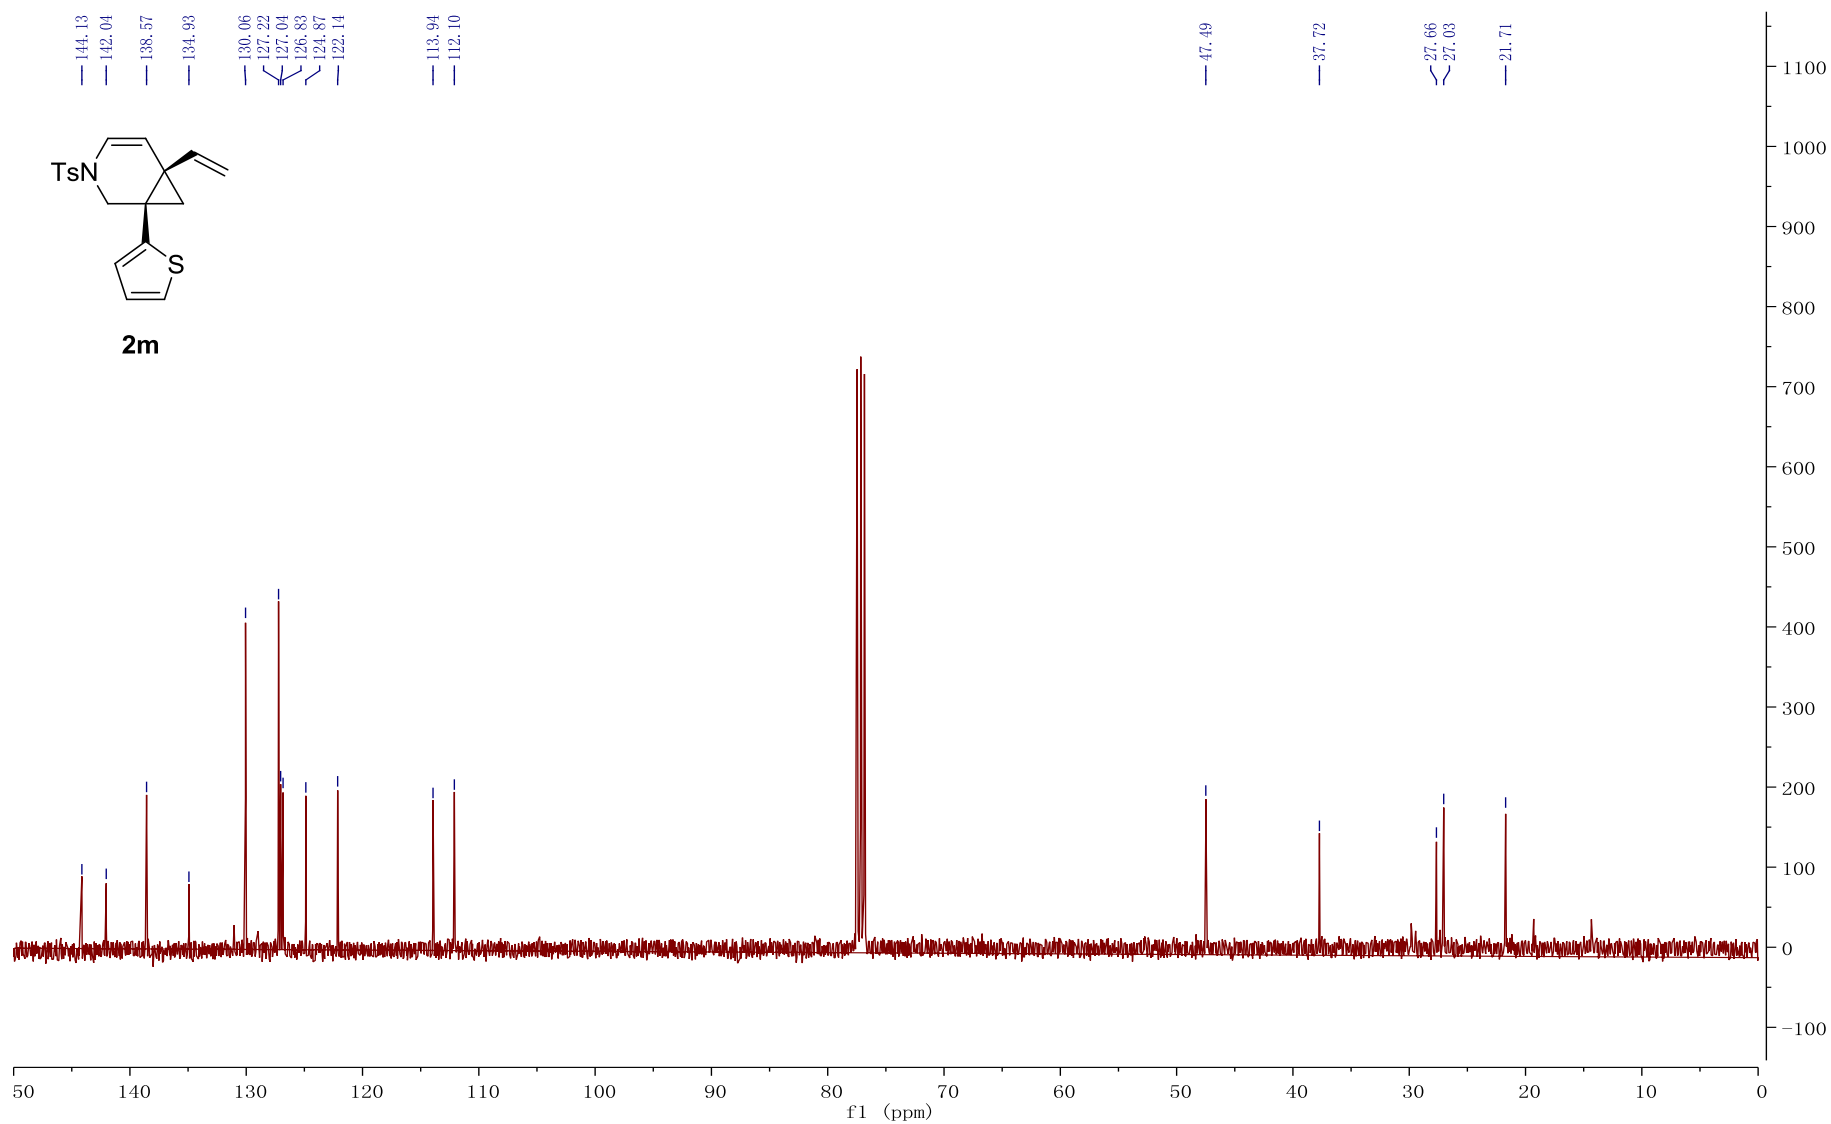

S105

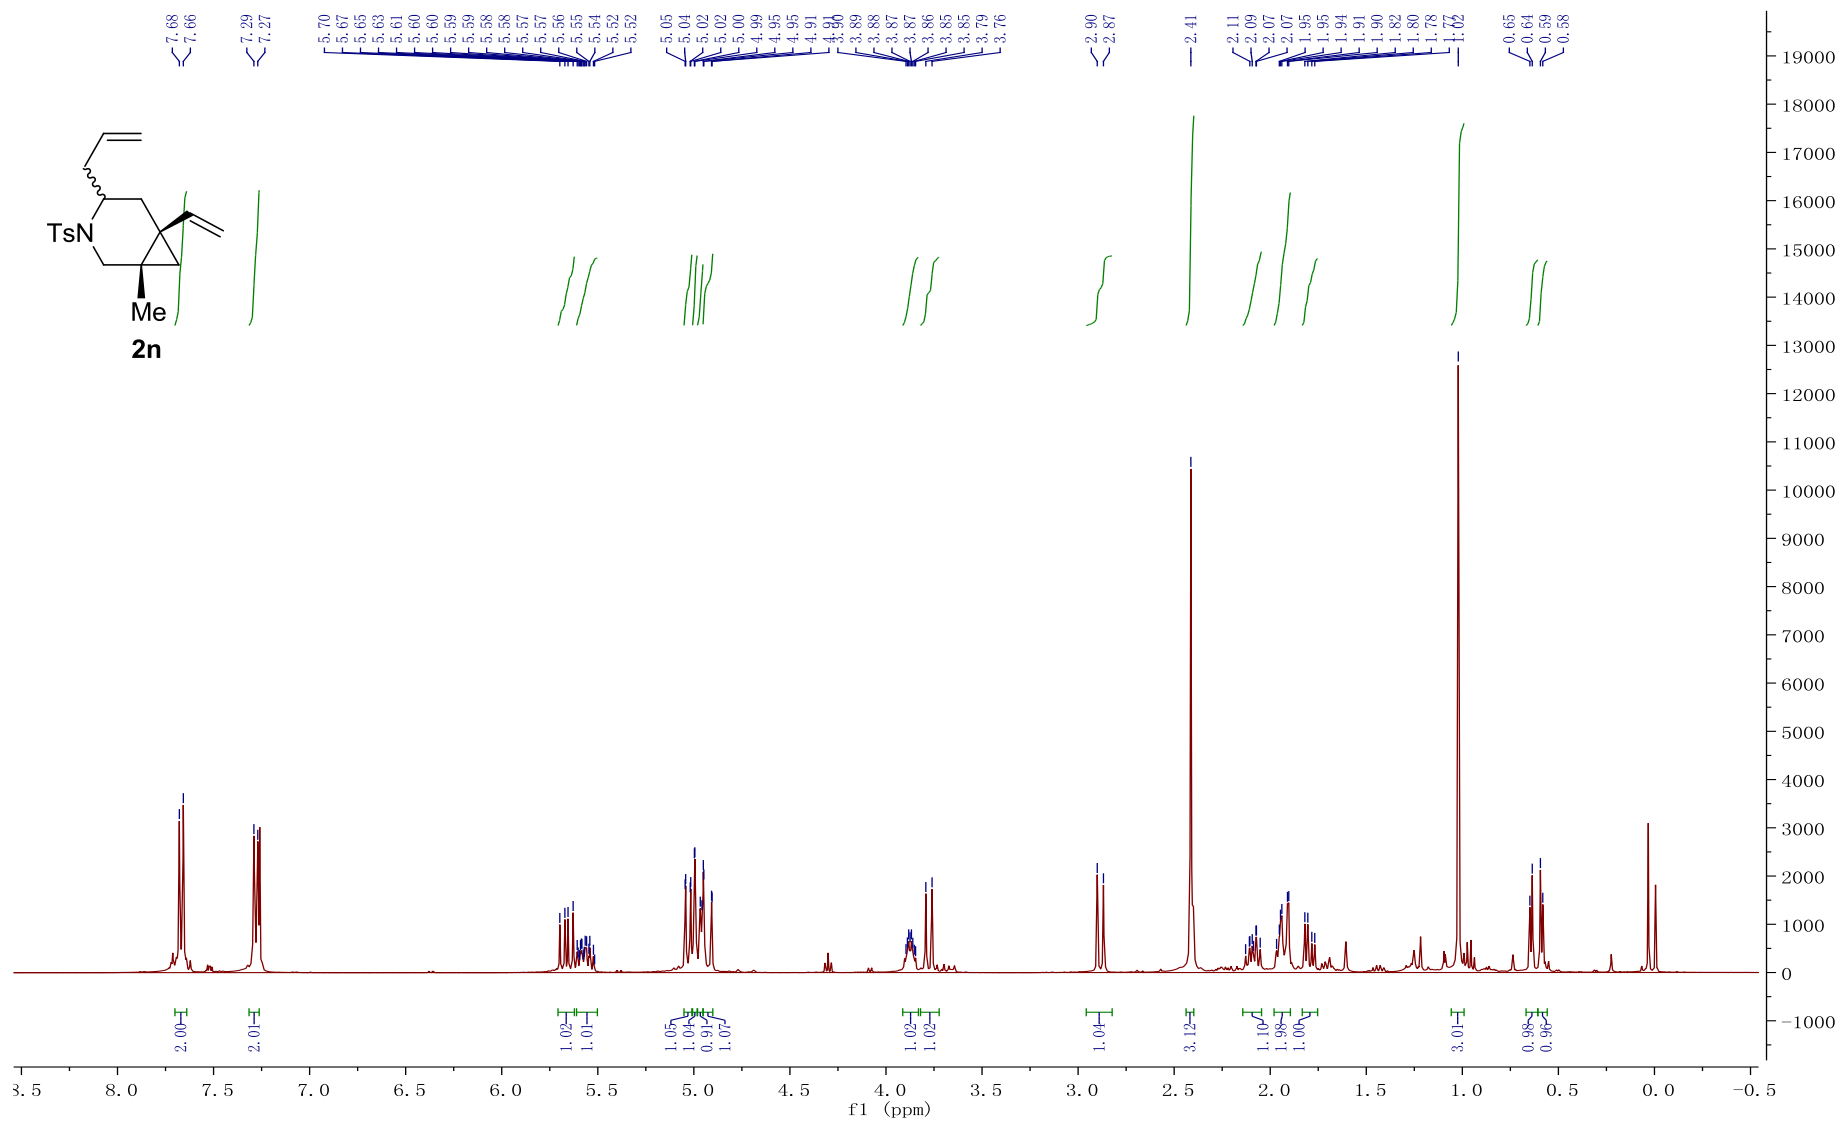

S106

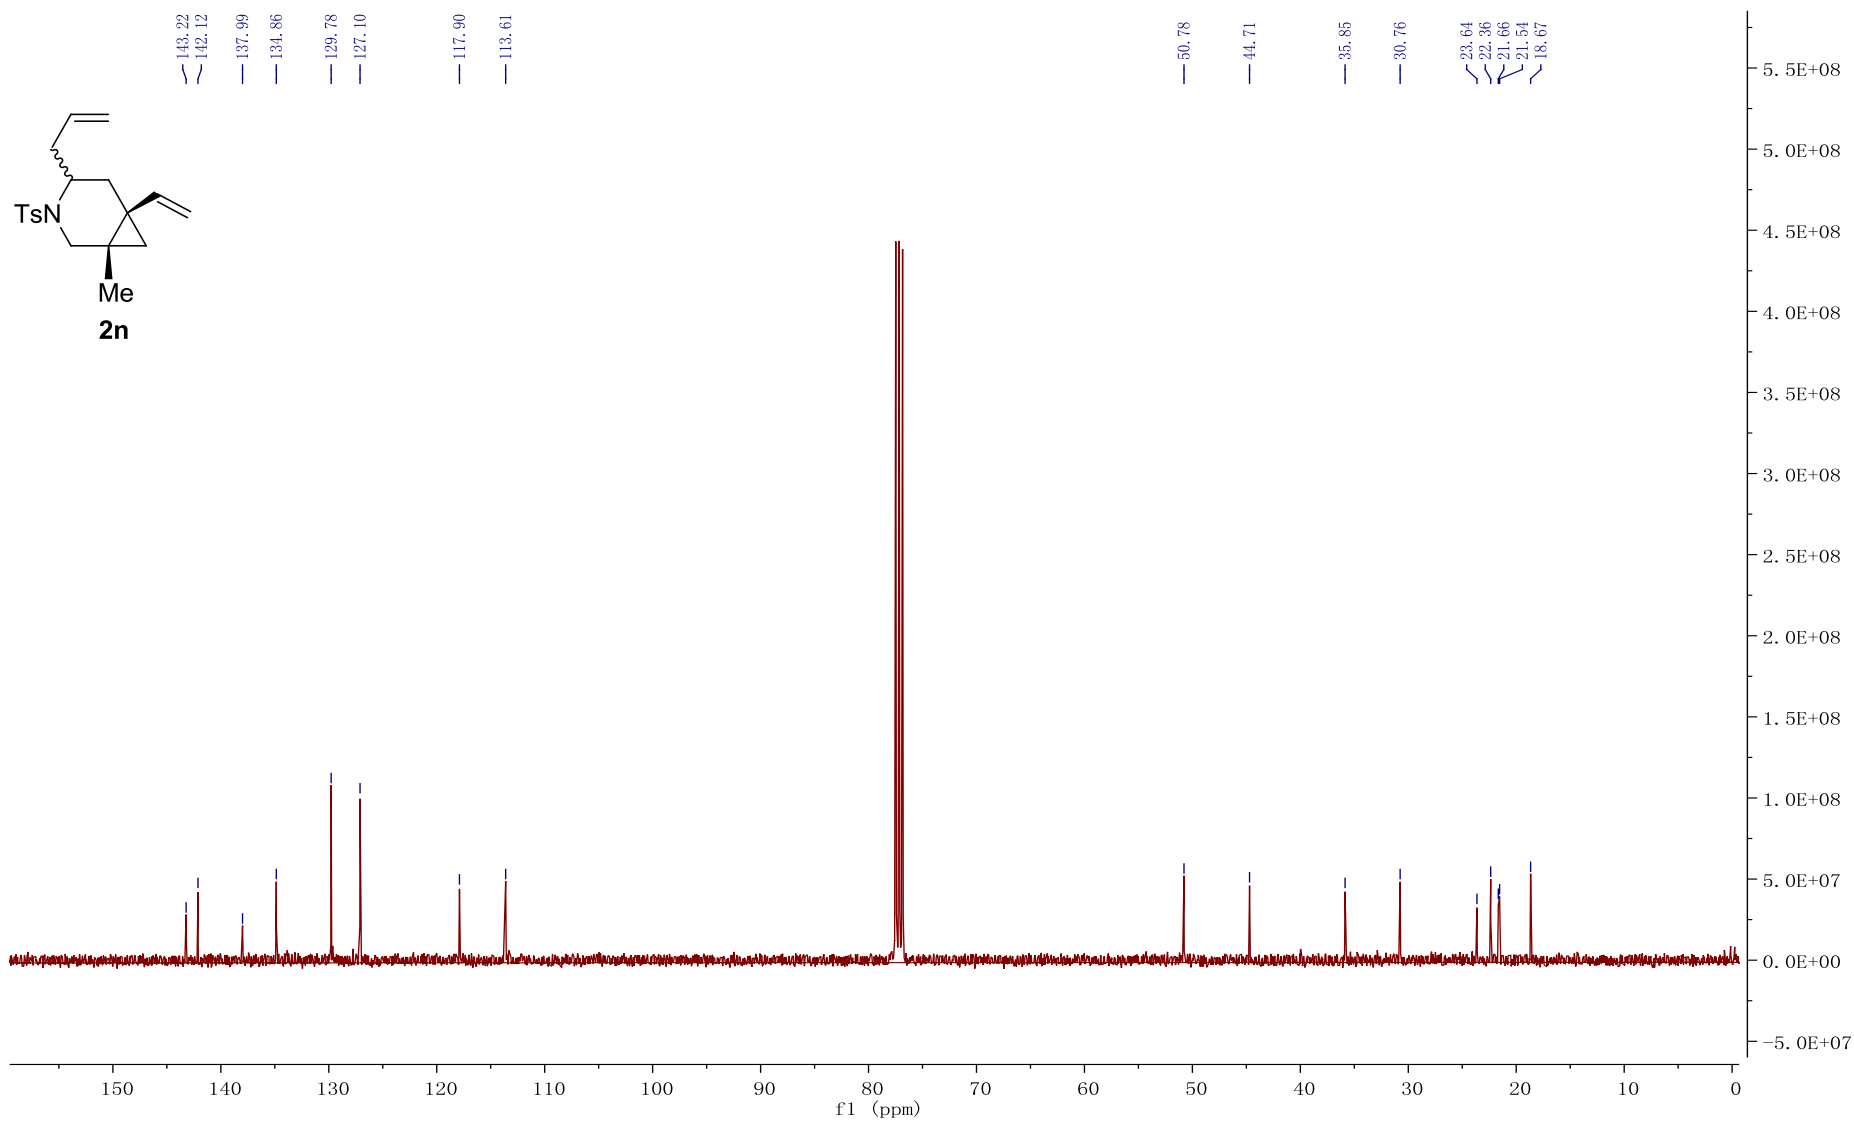

S107

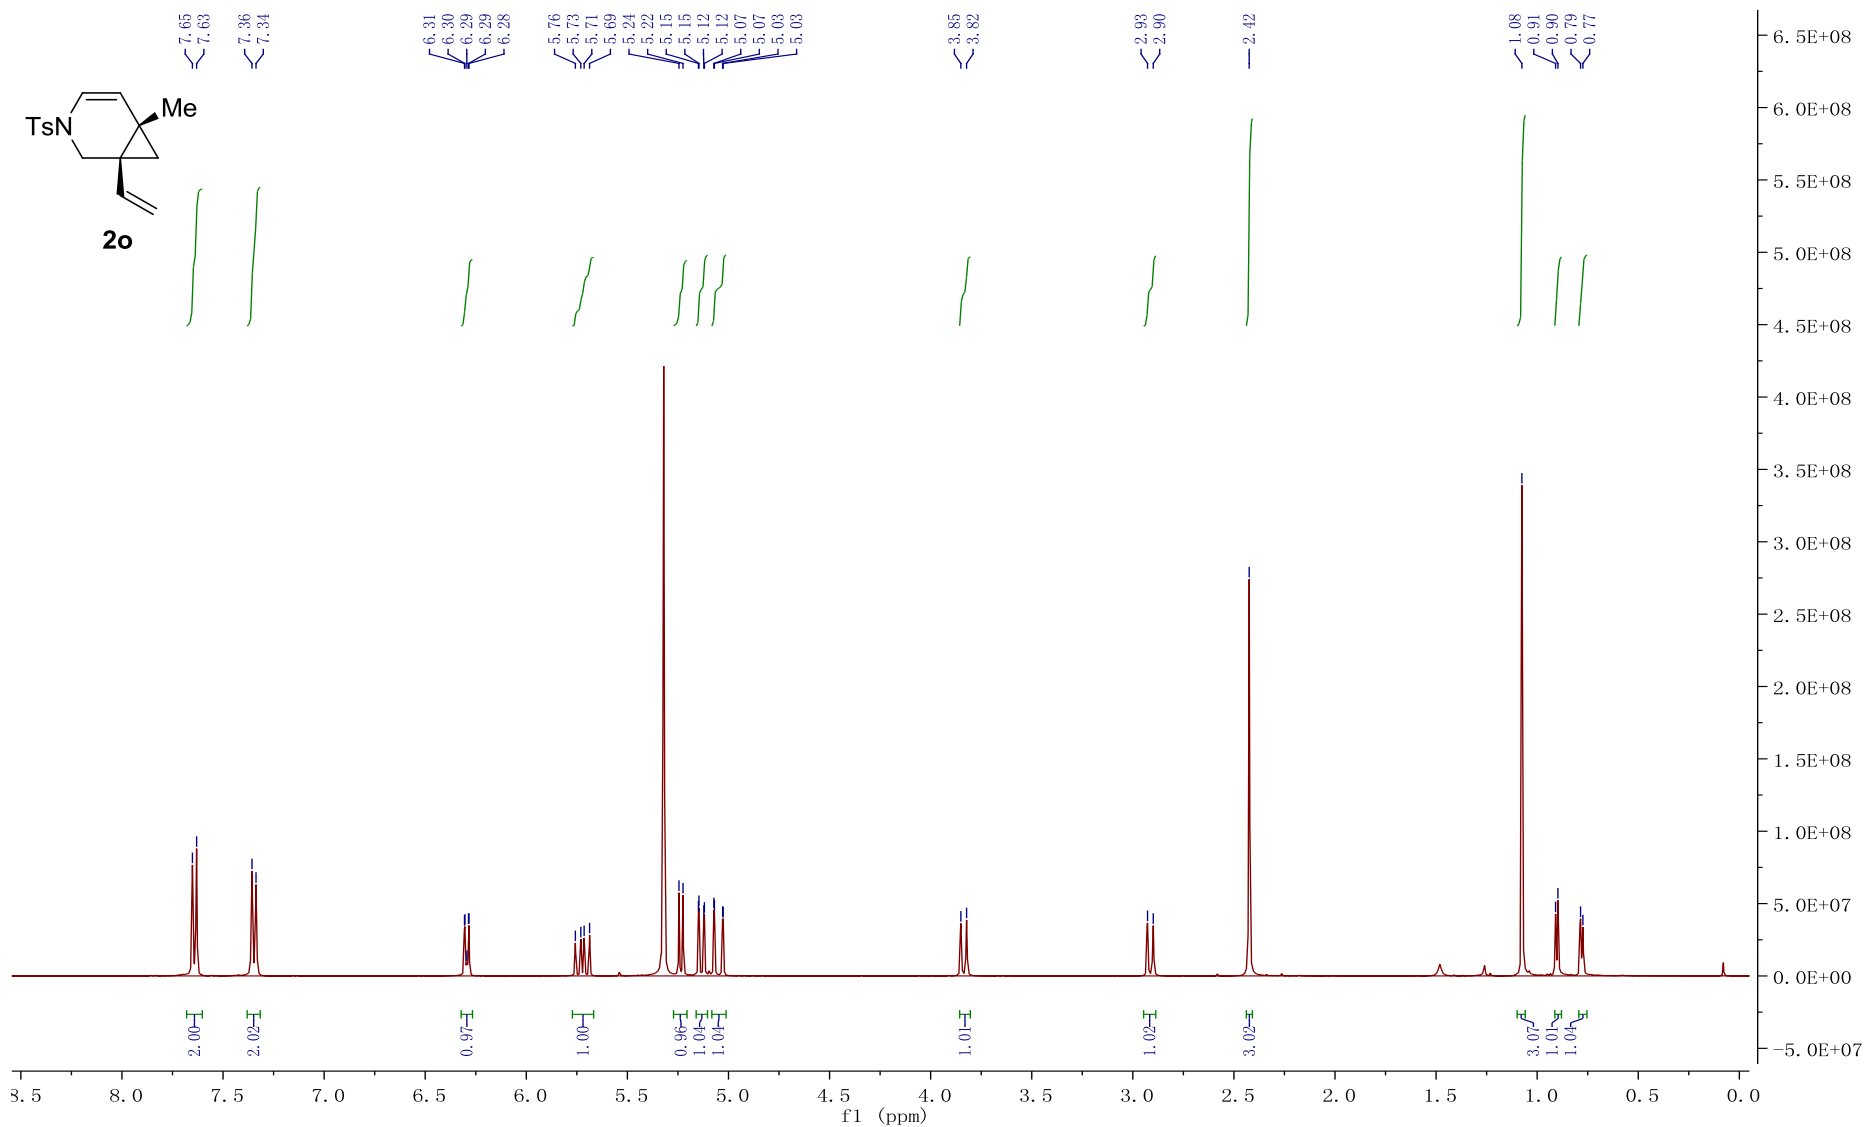

S108

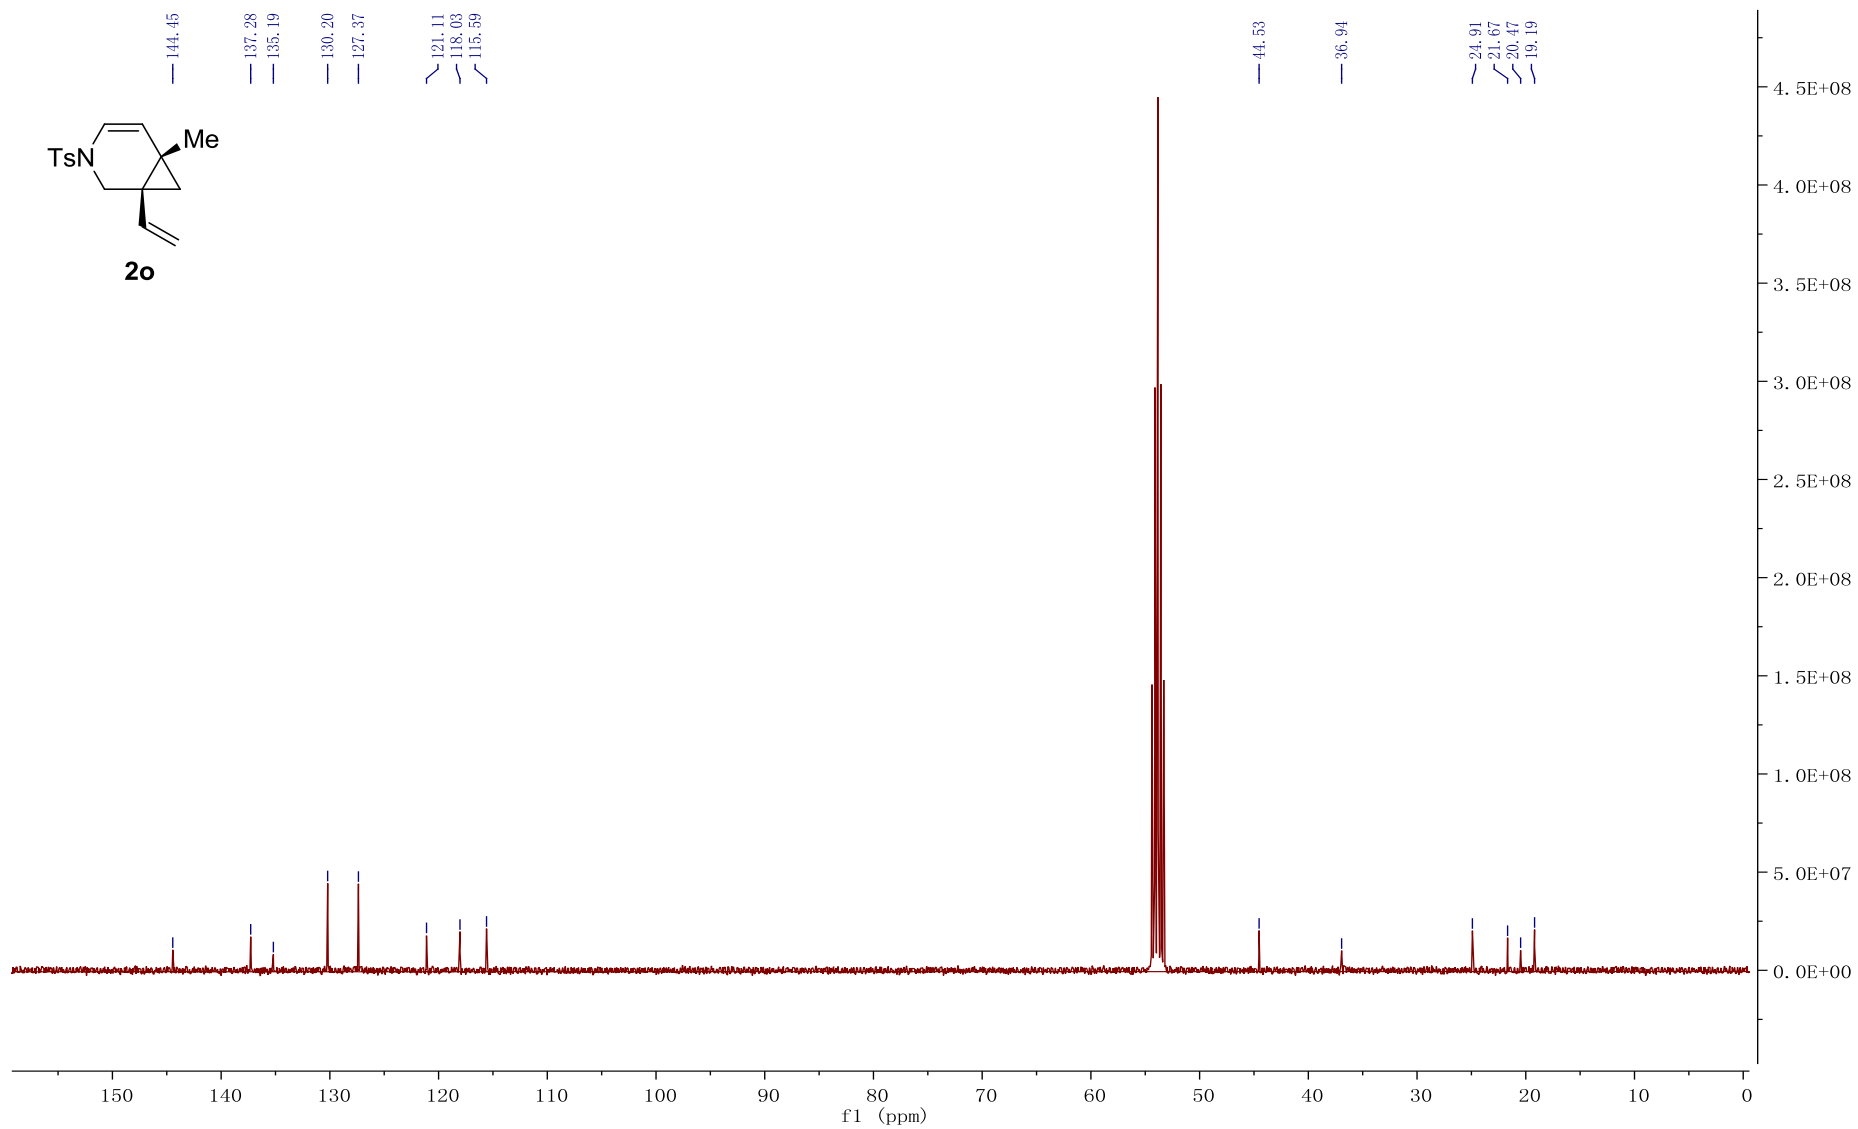

S109

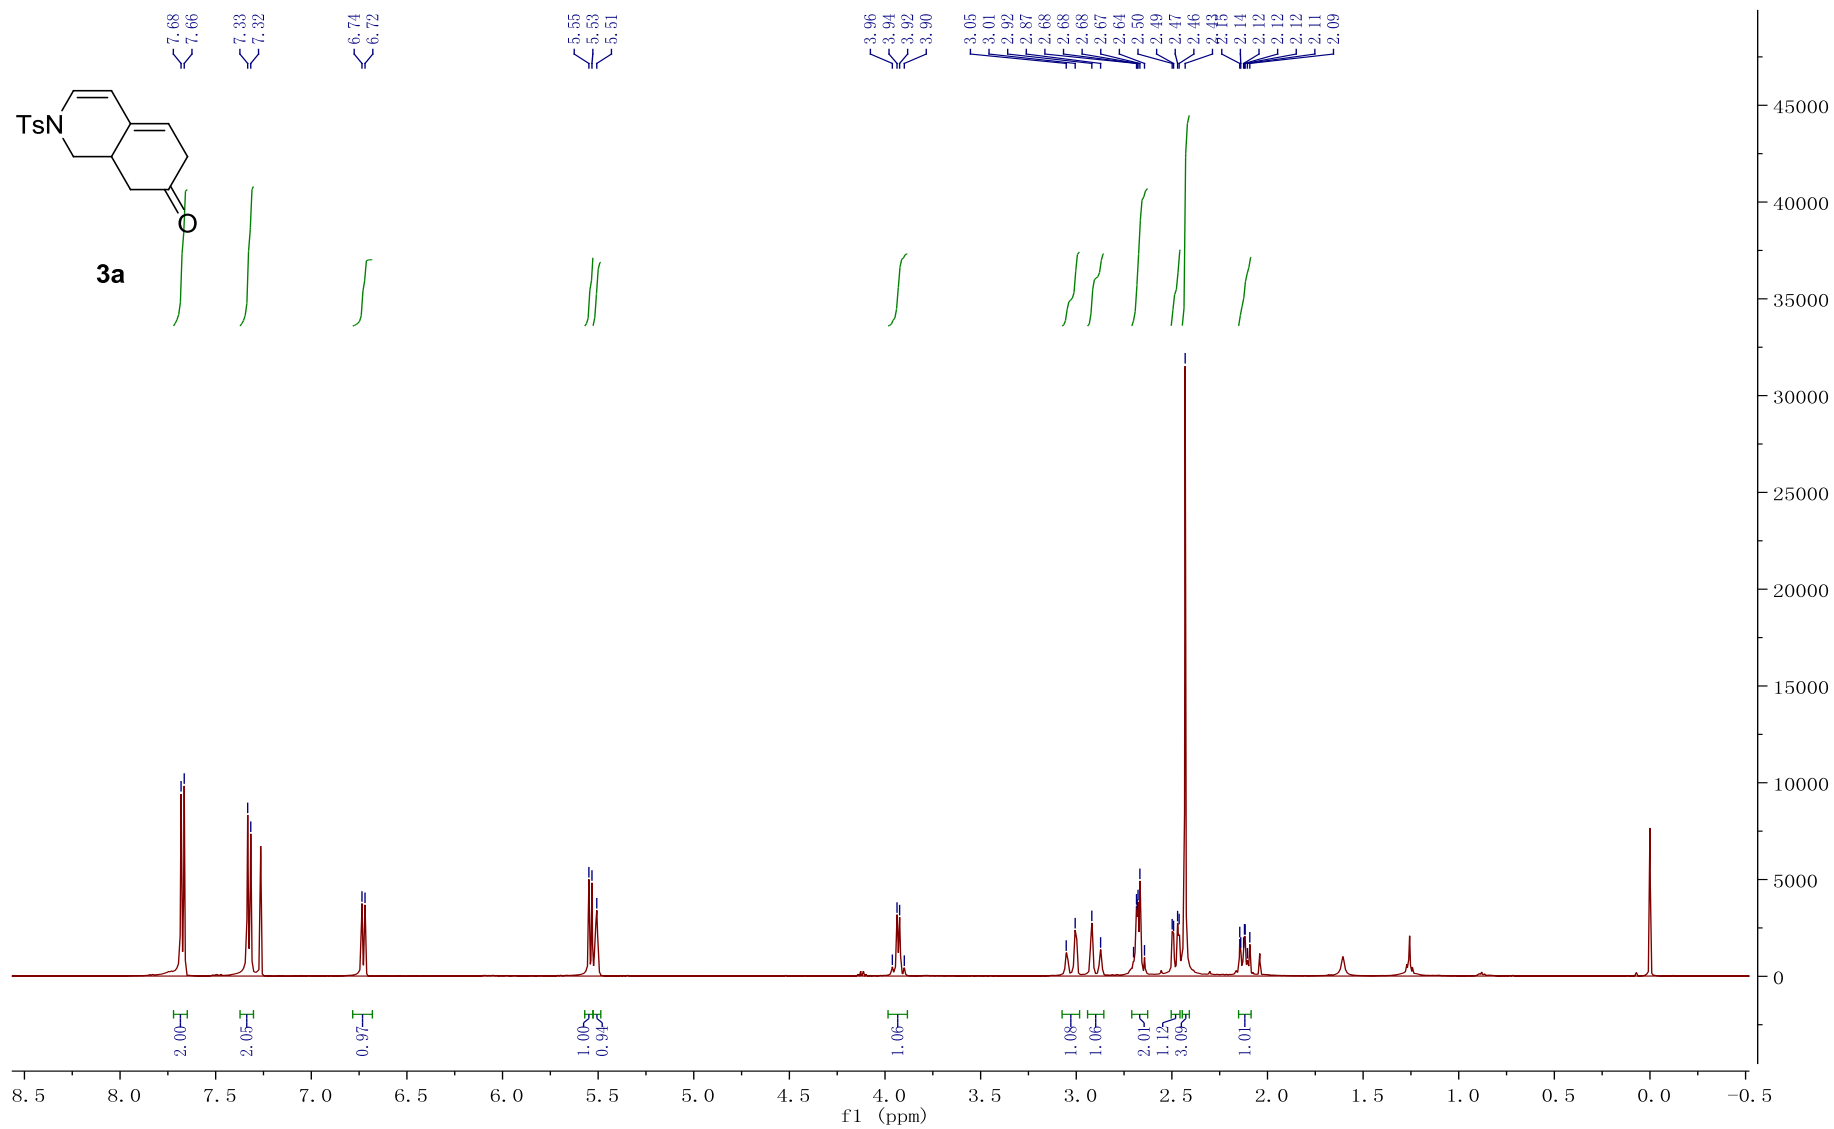

S110

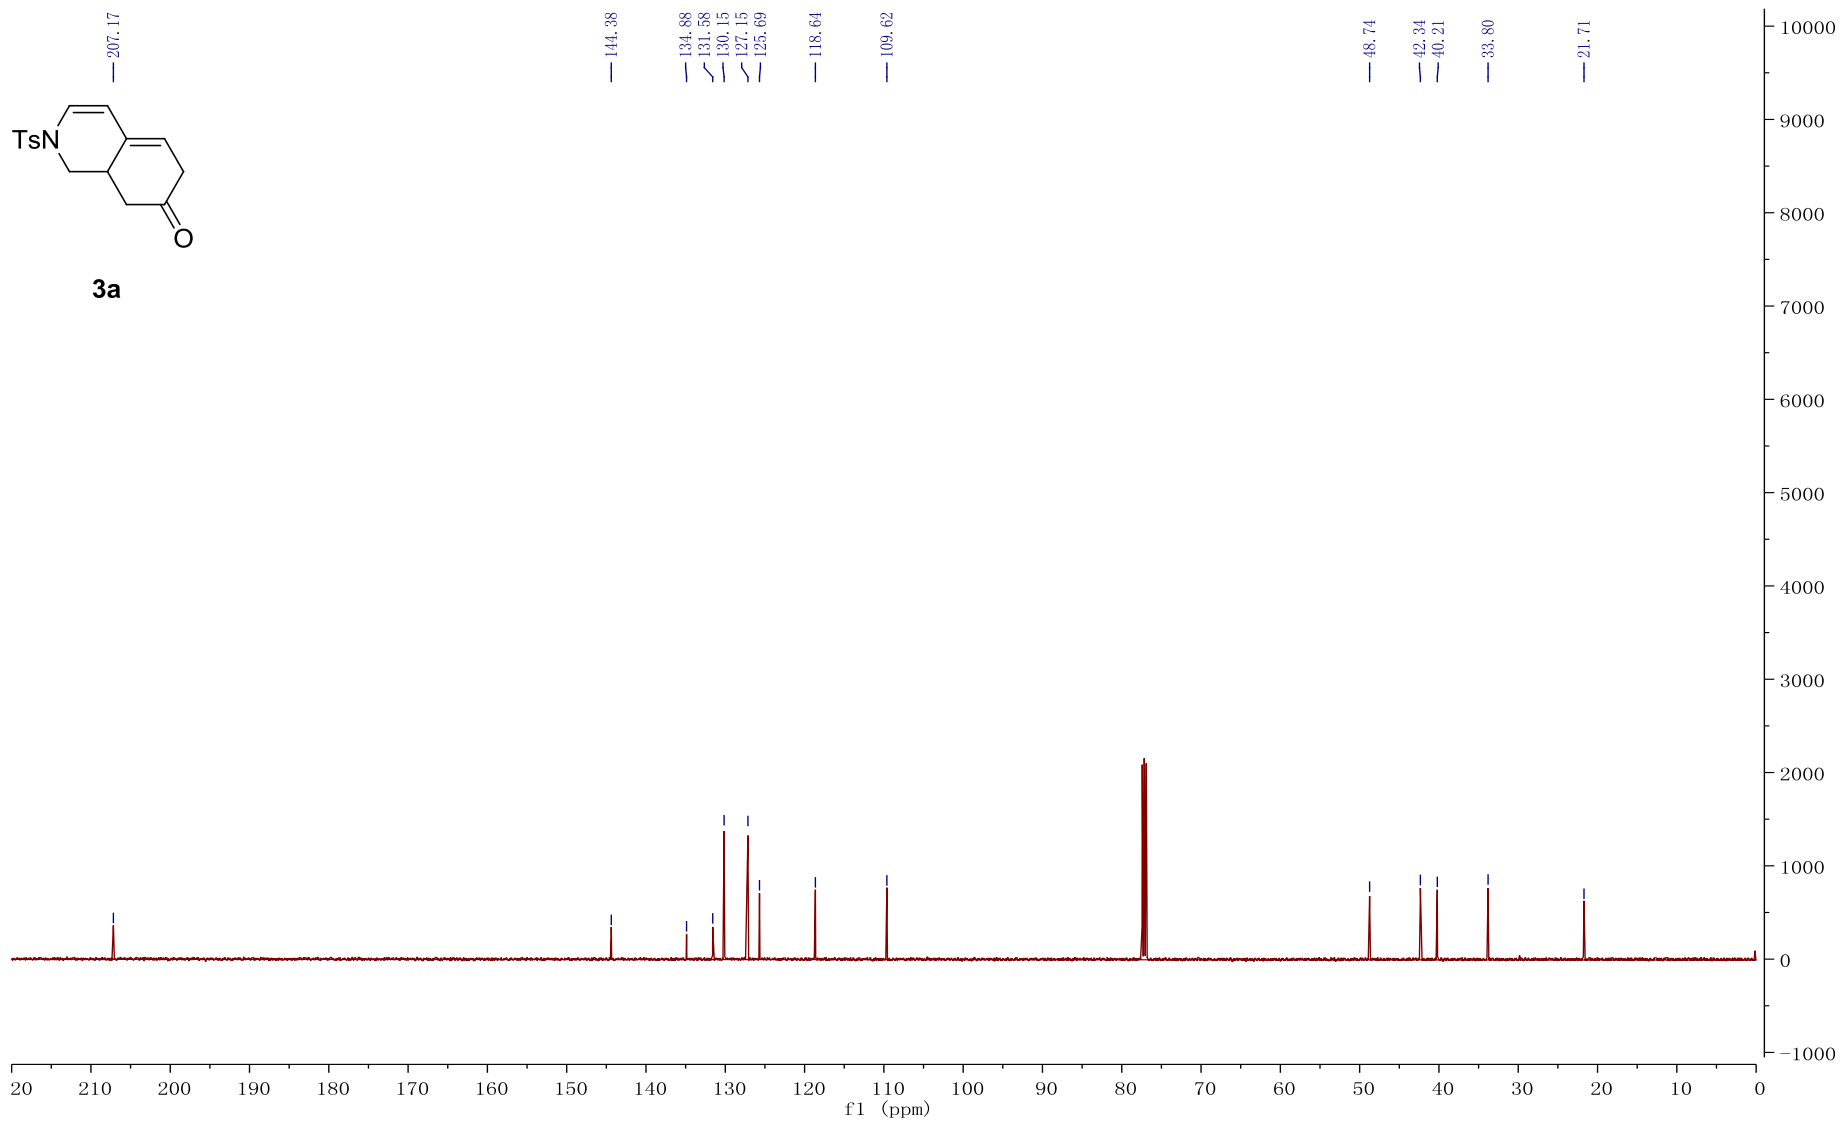

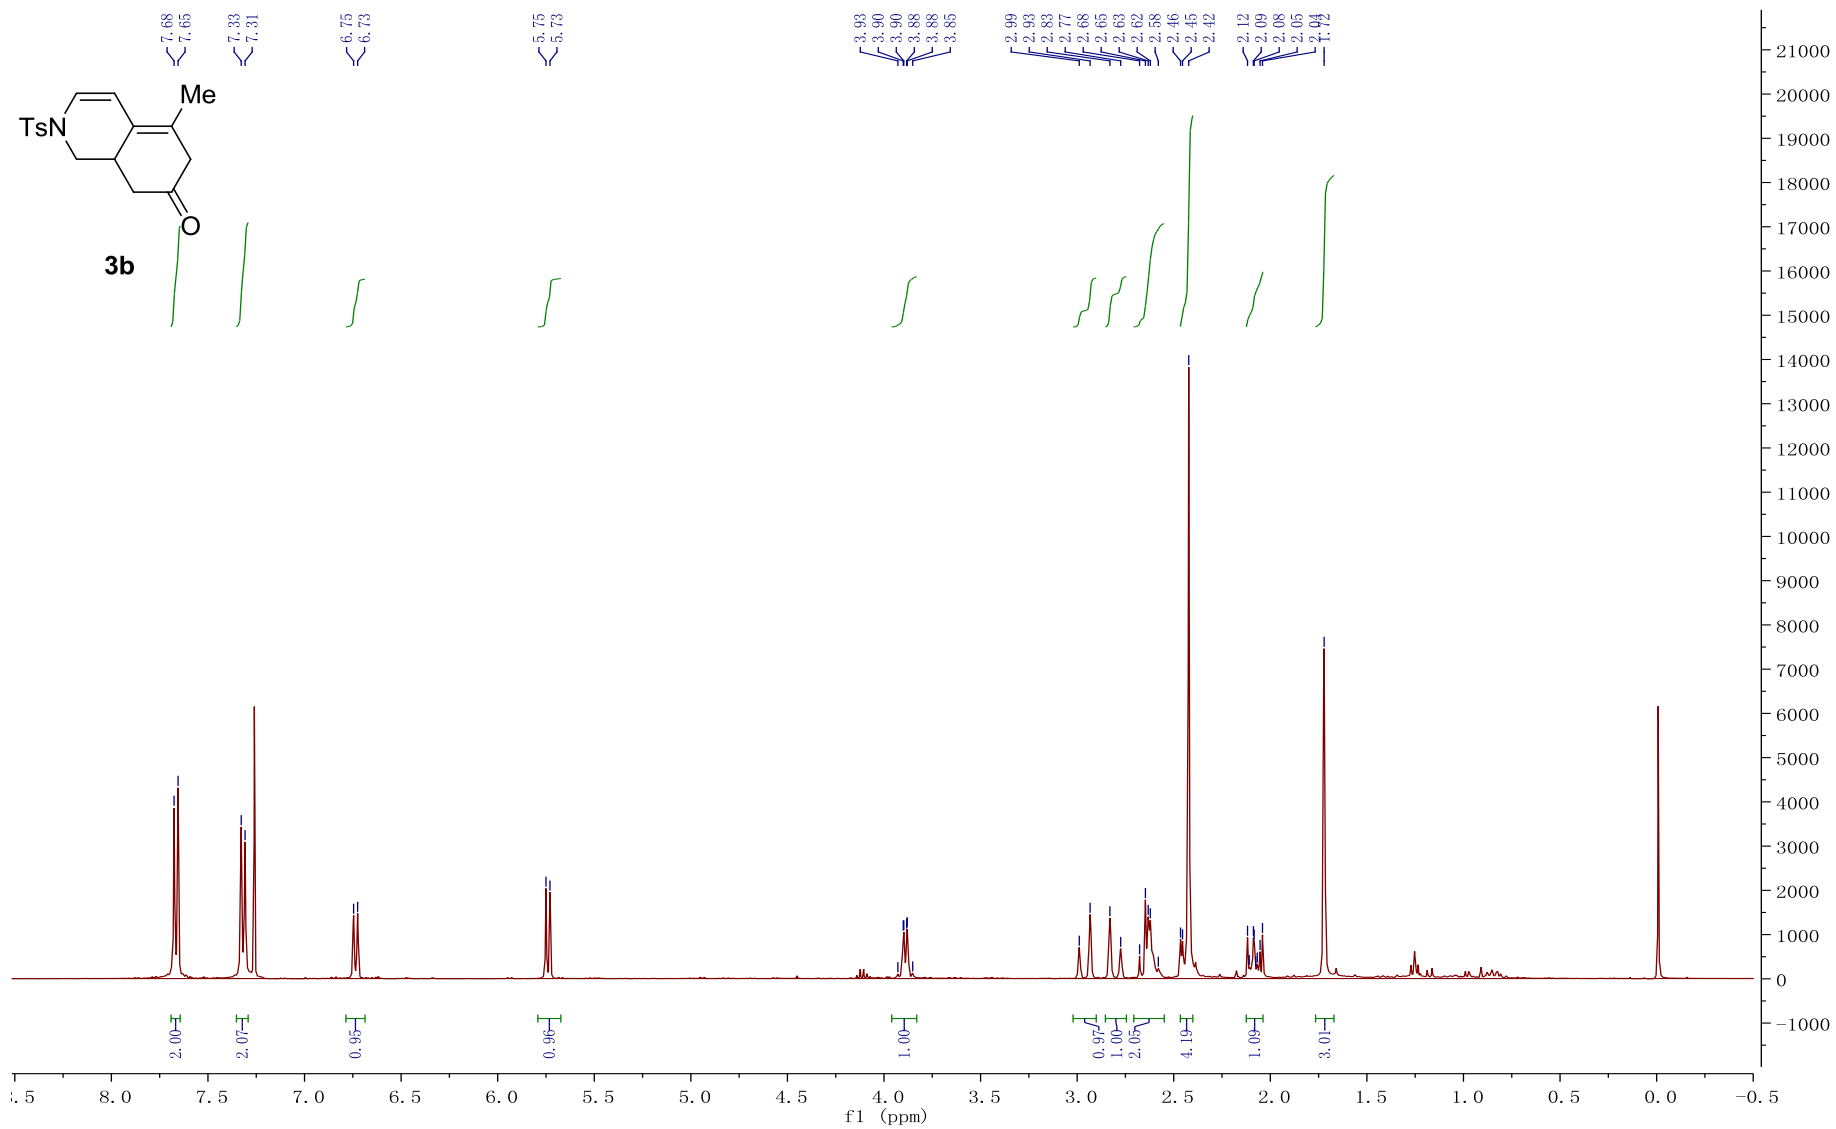

S112

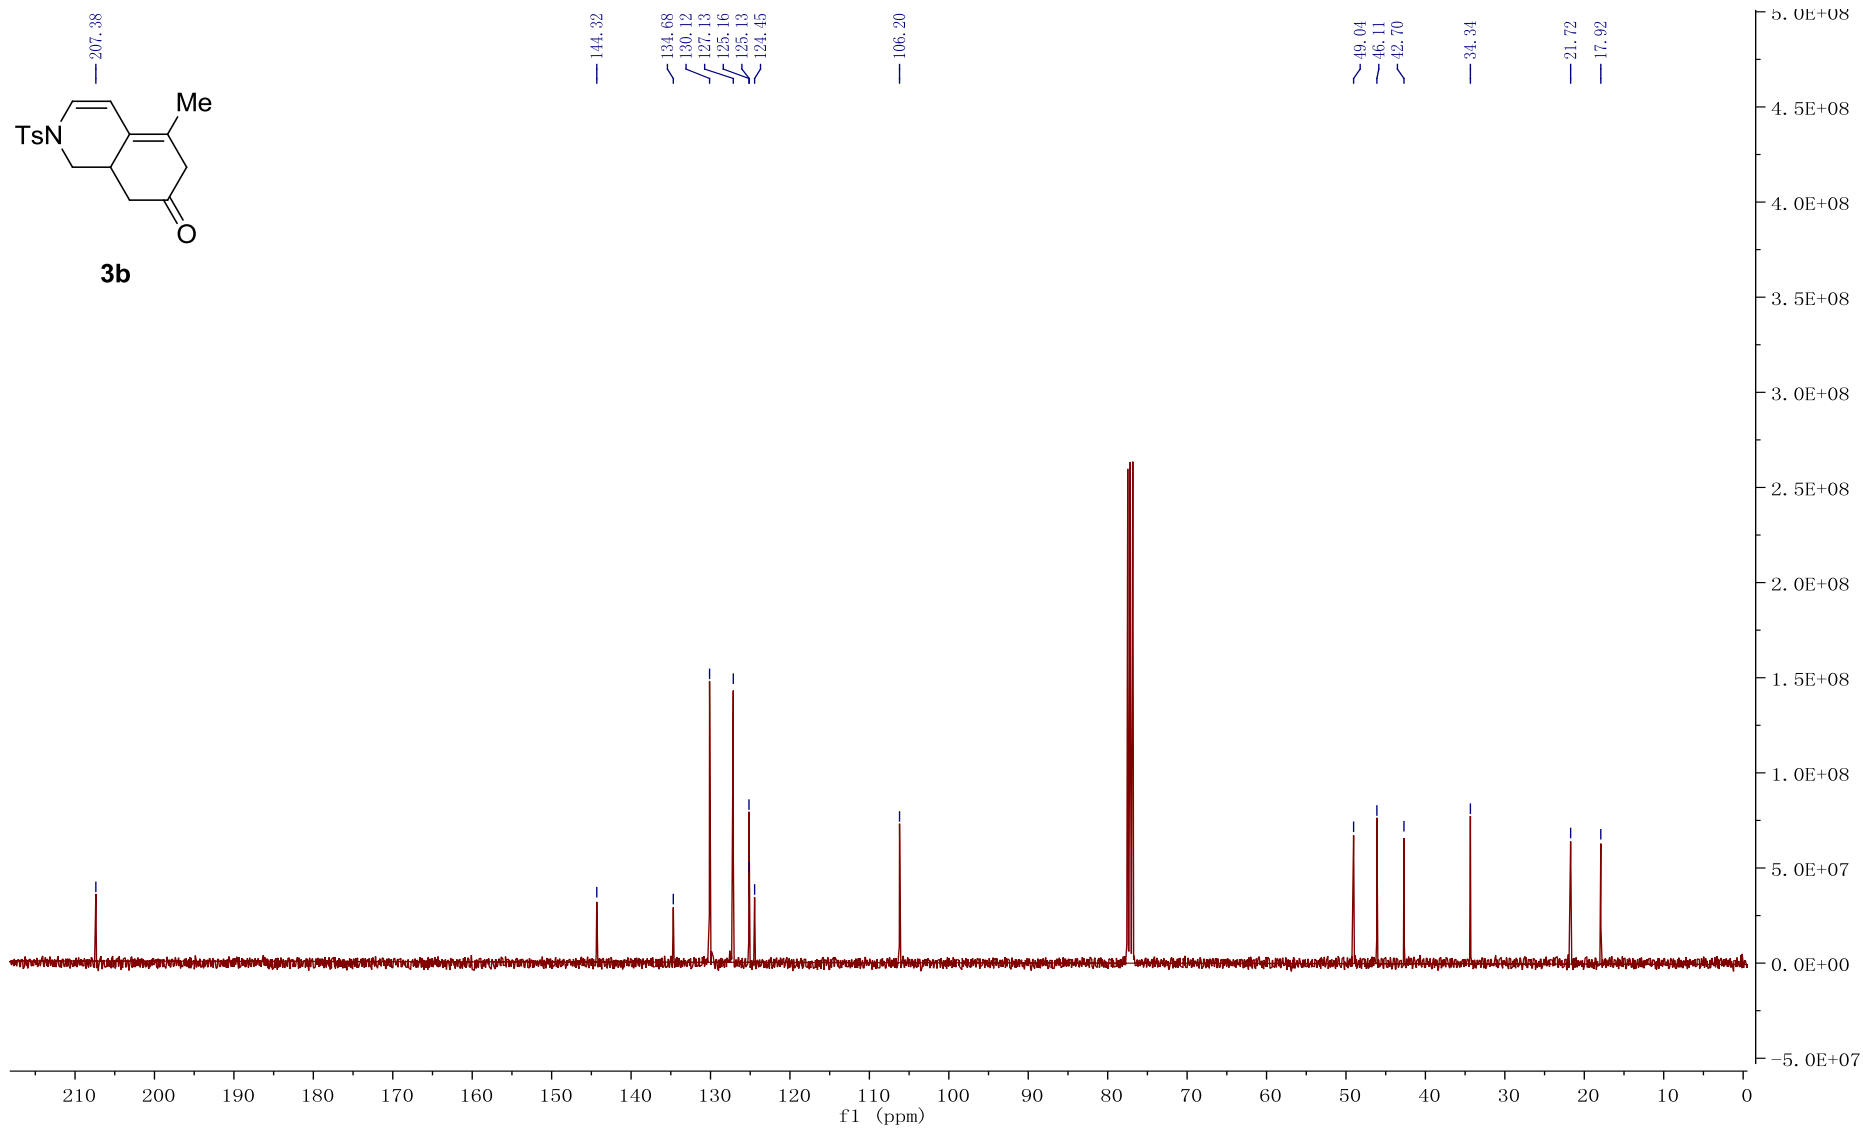

S113

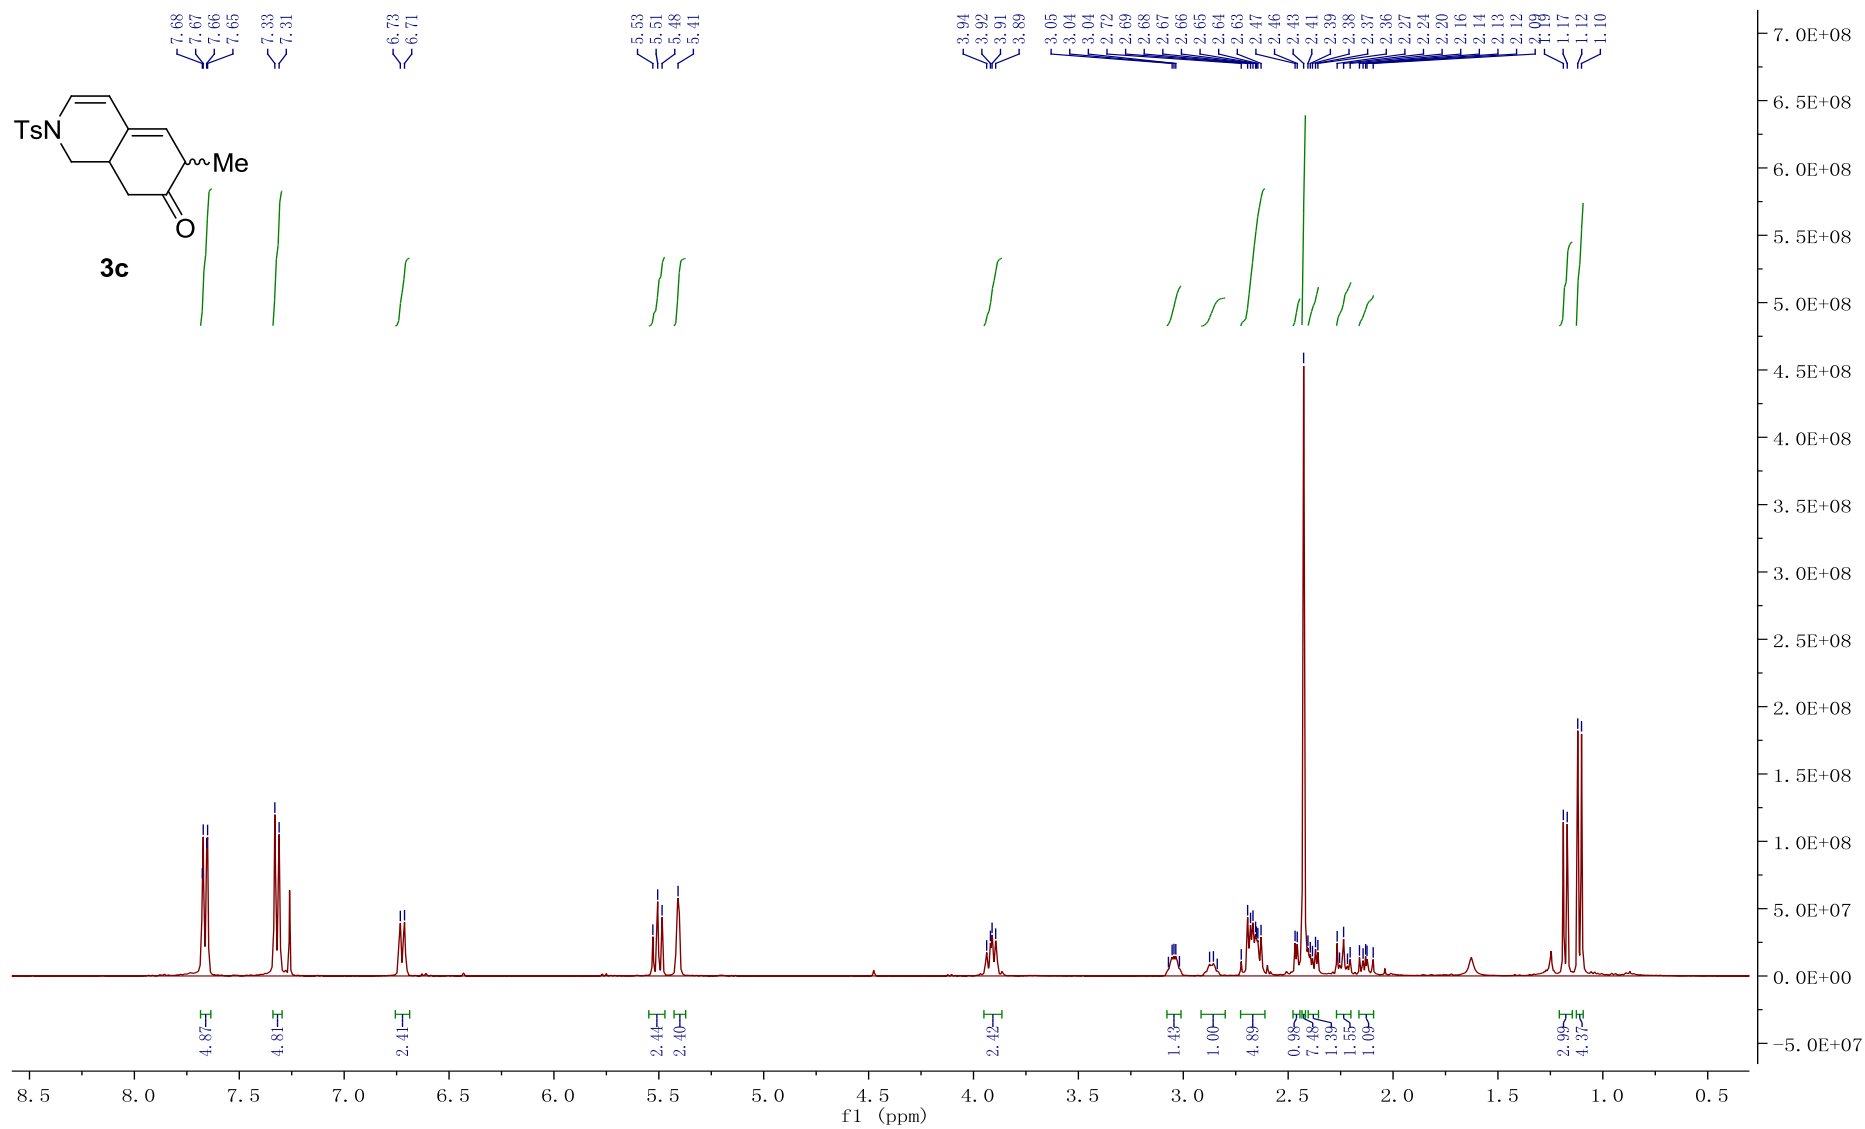

S114

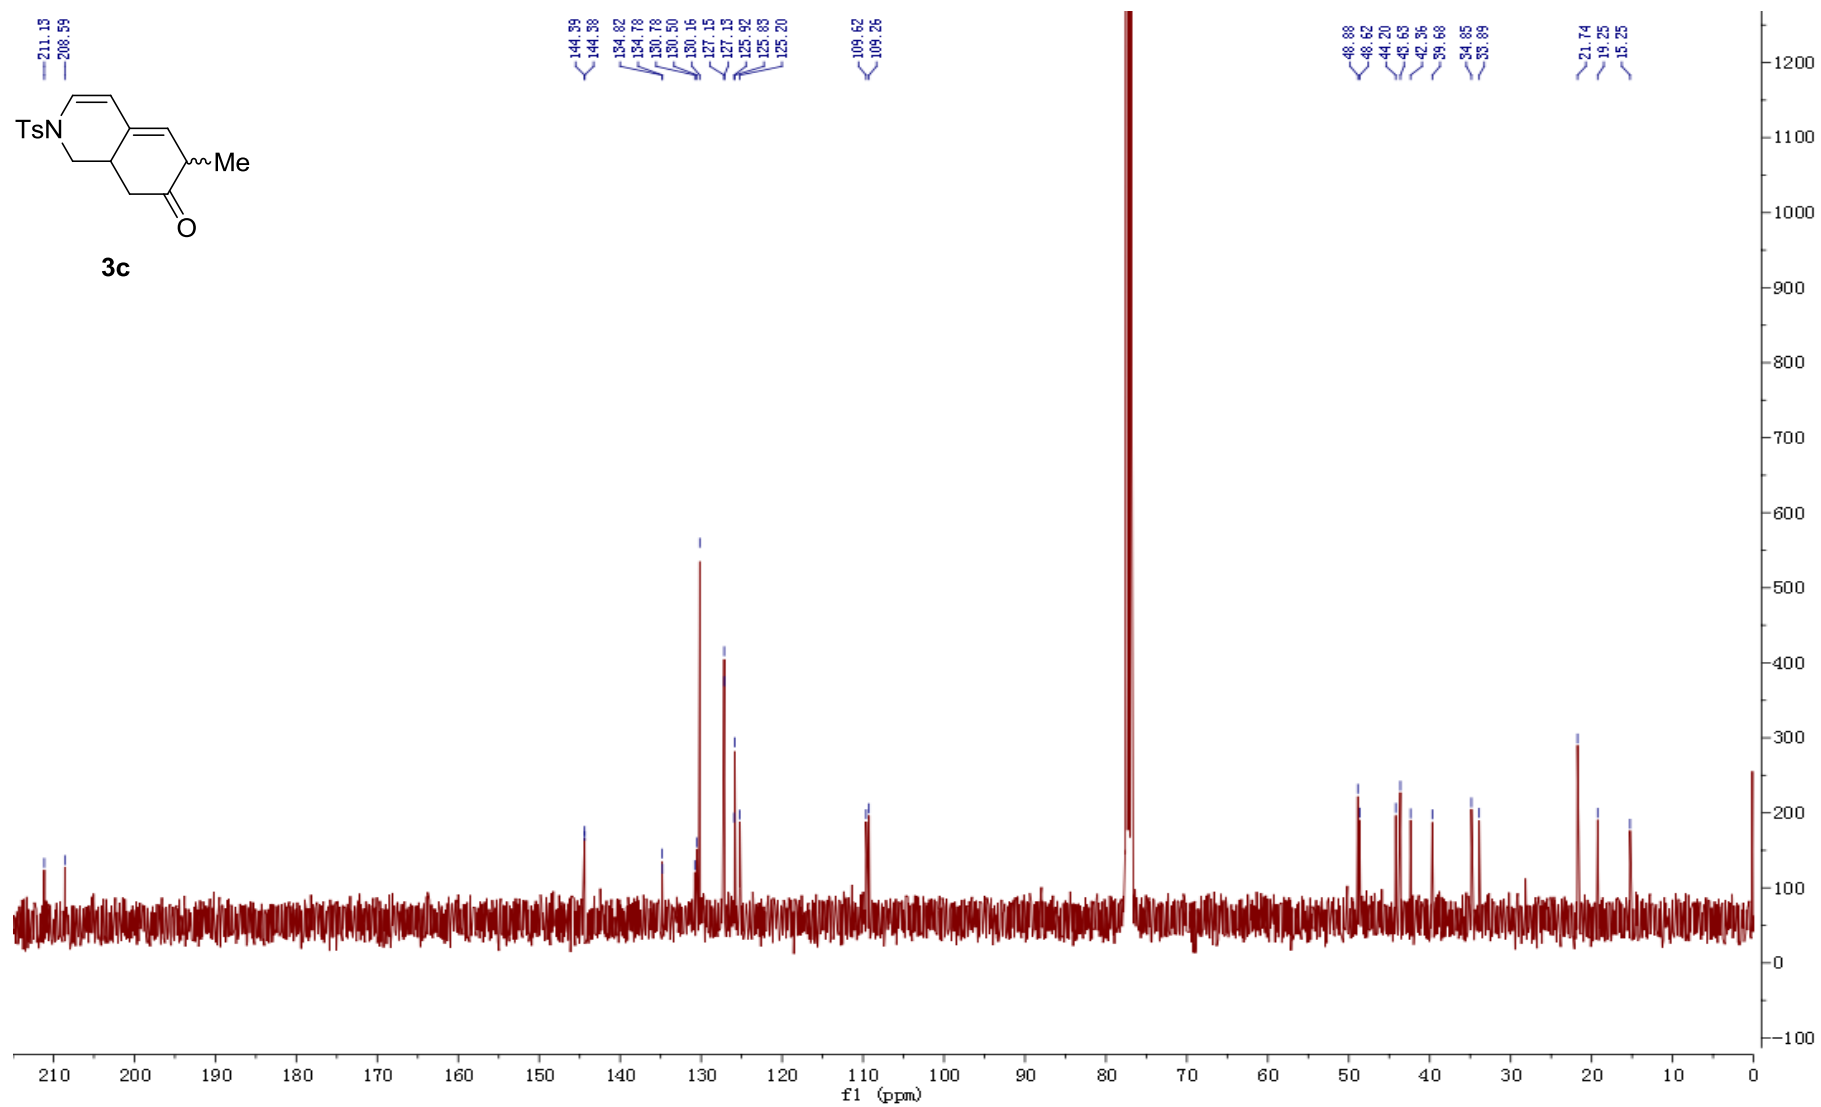

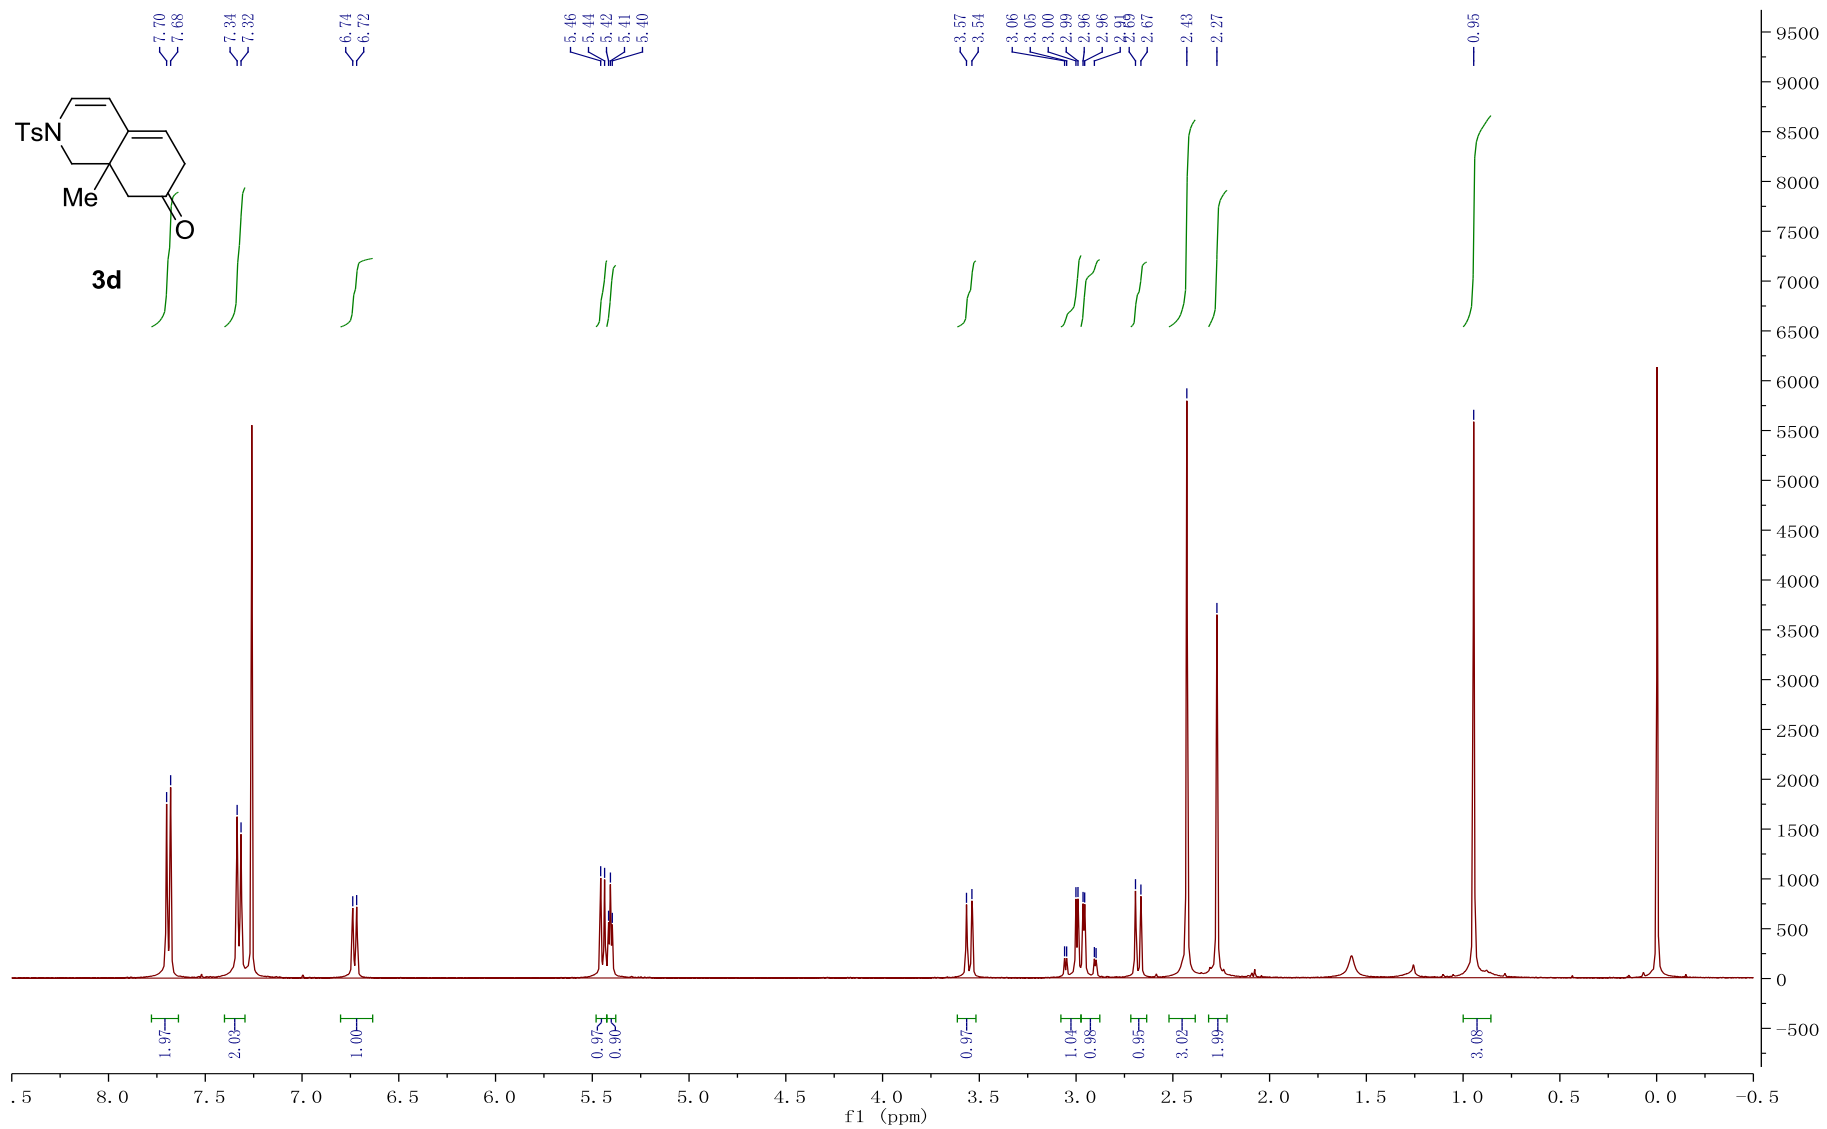

S116

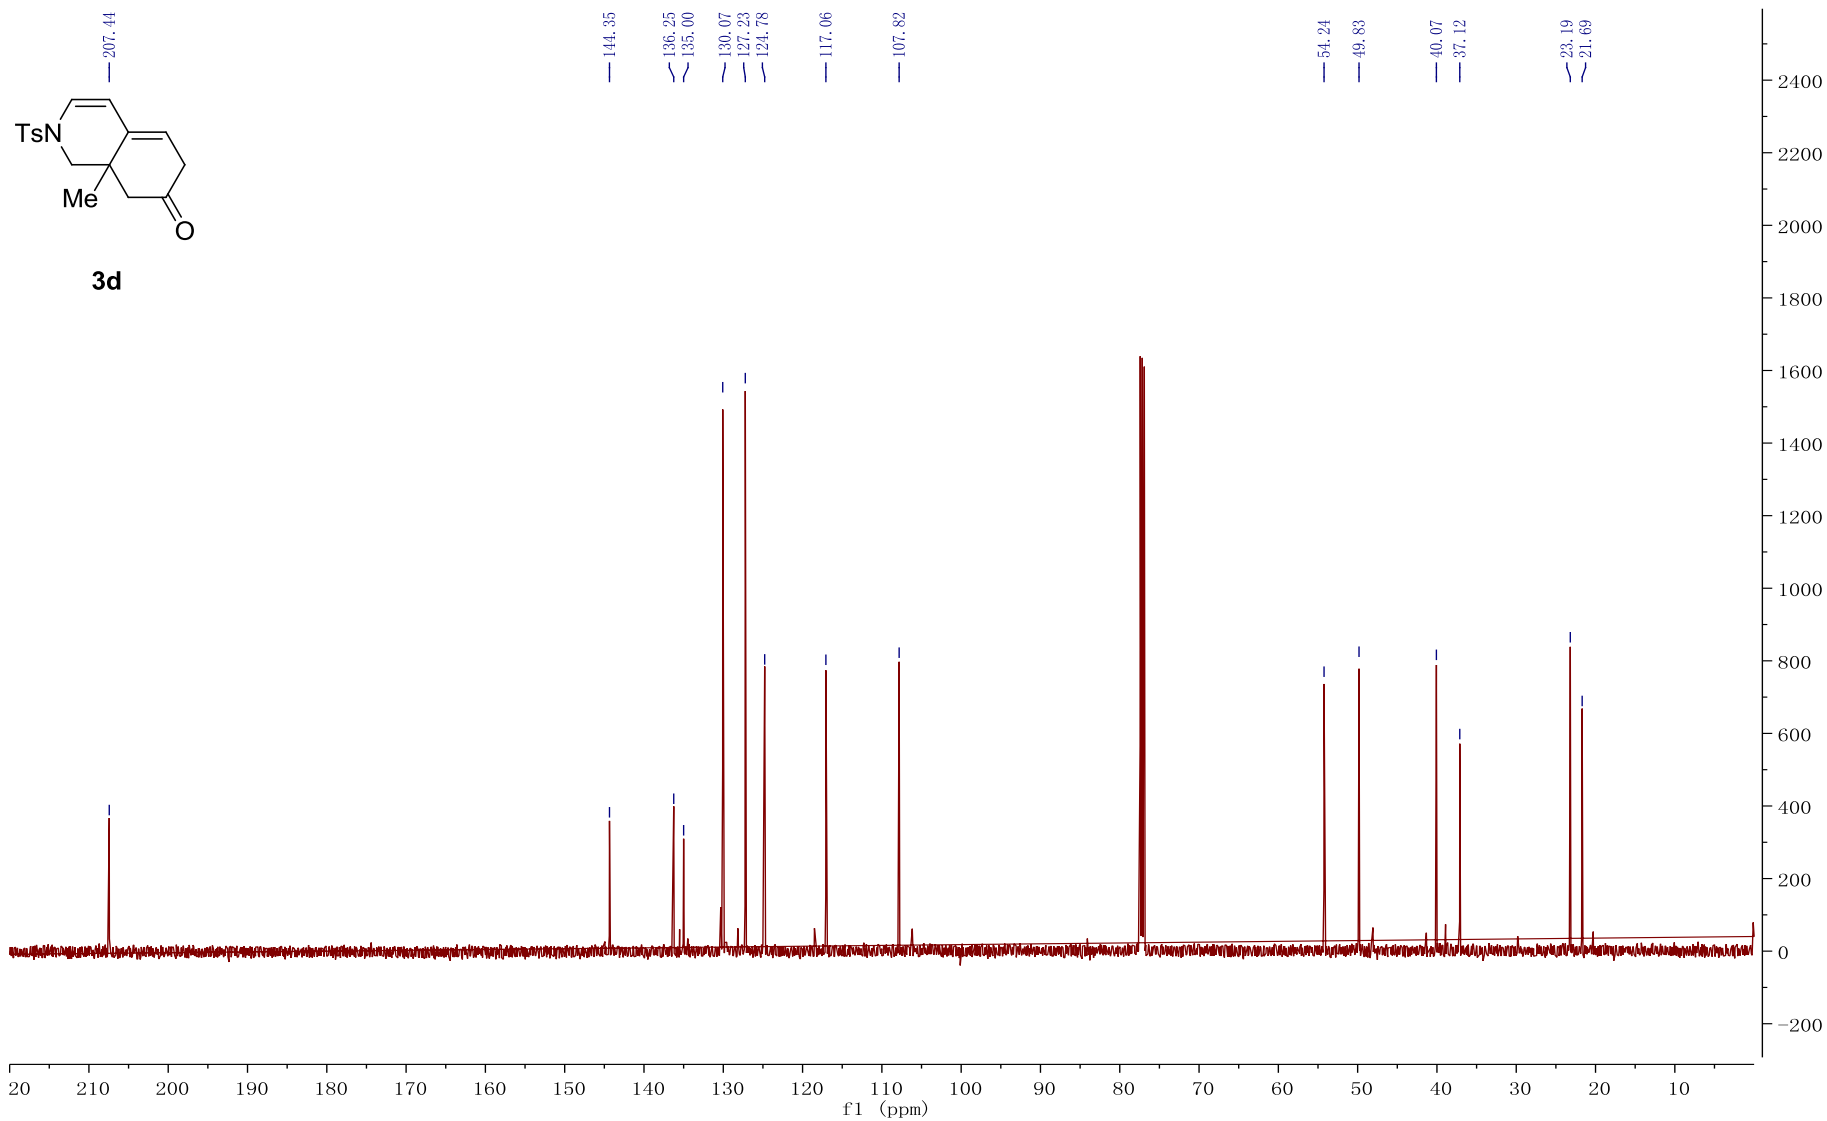

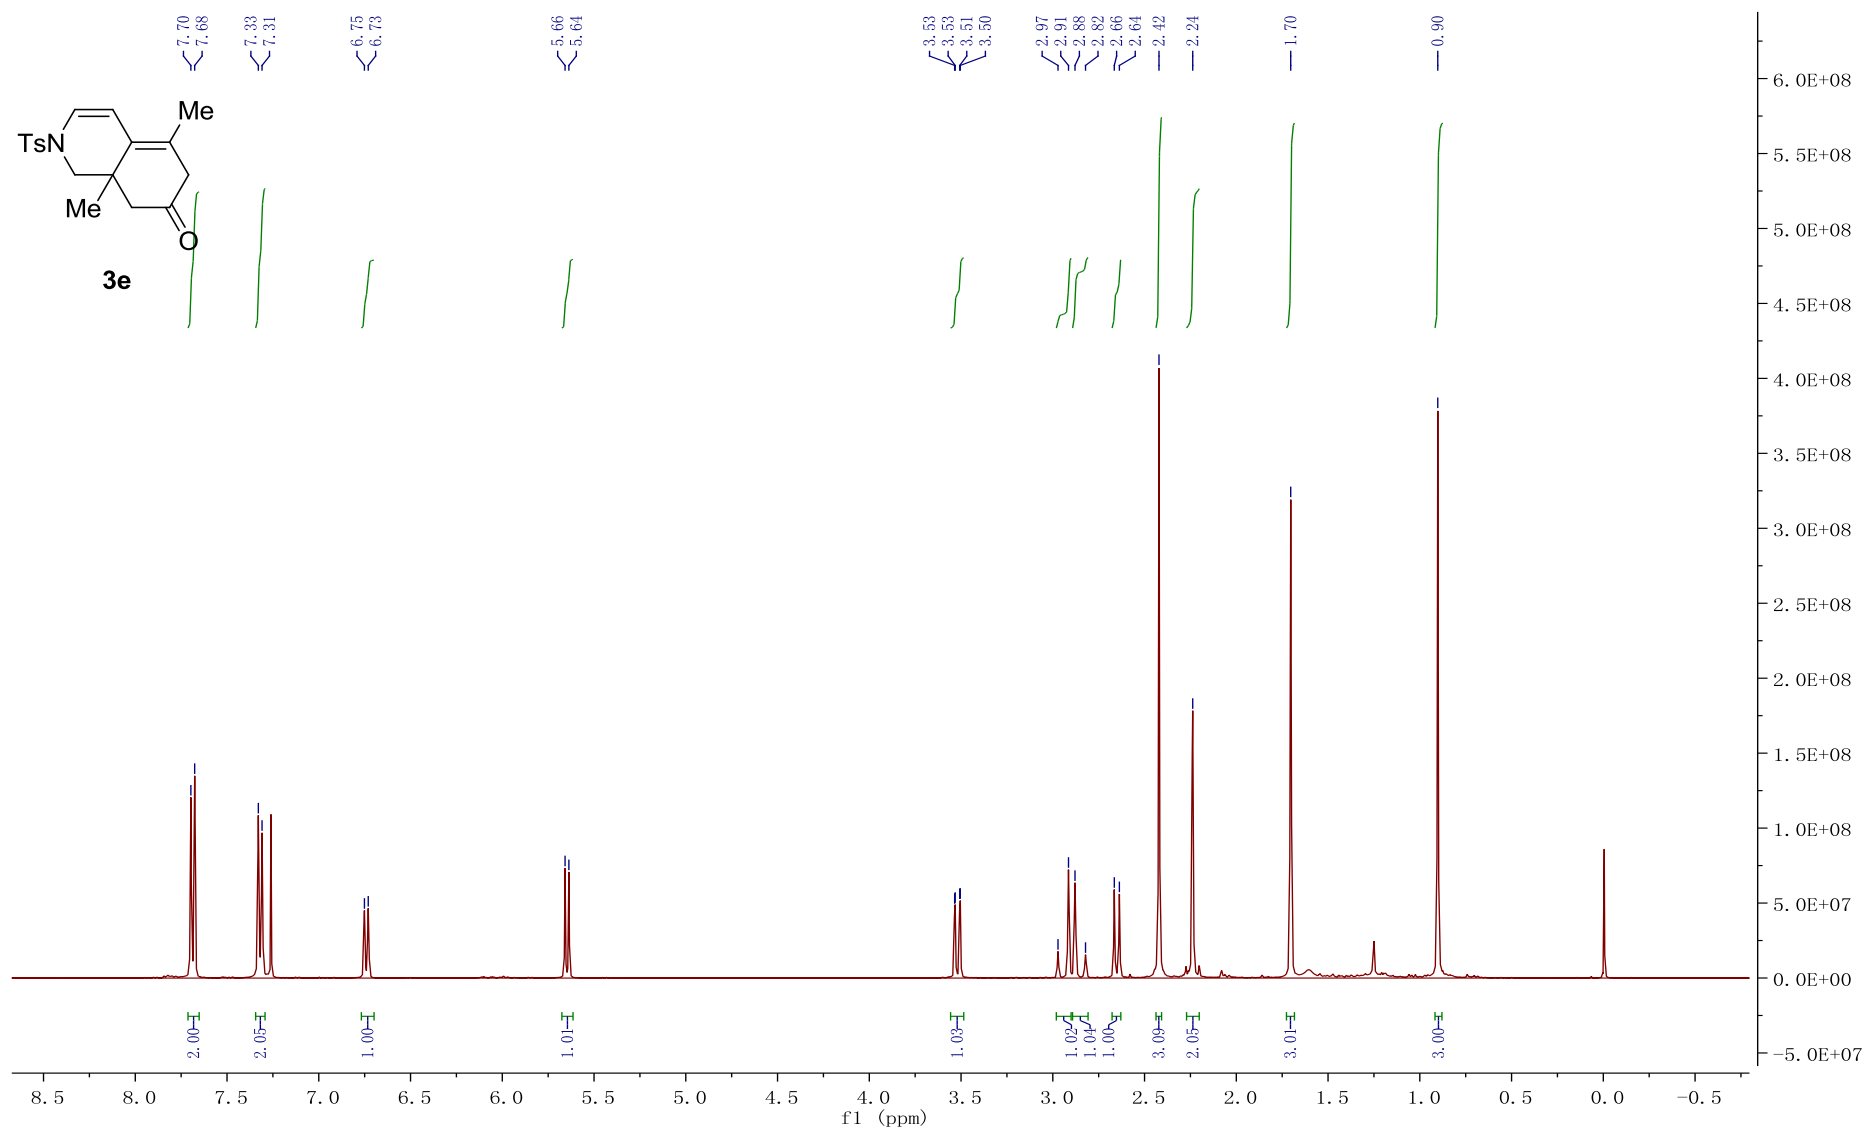

S118

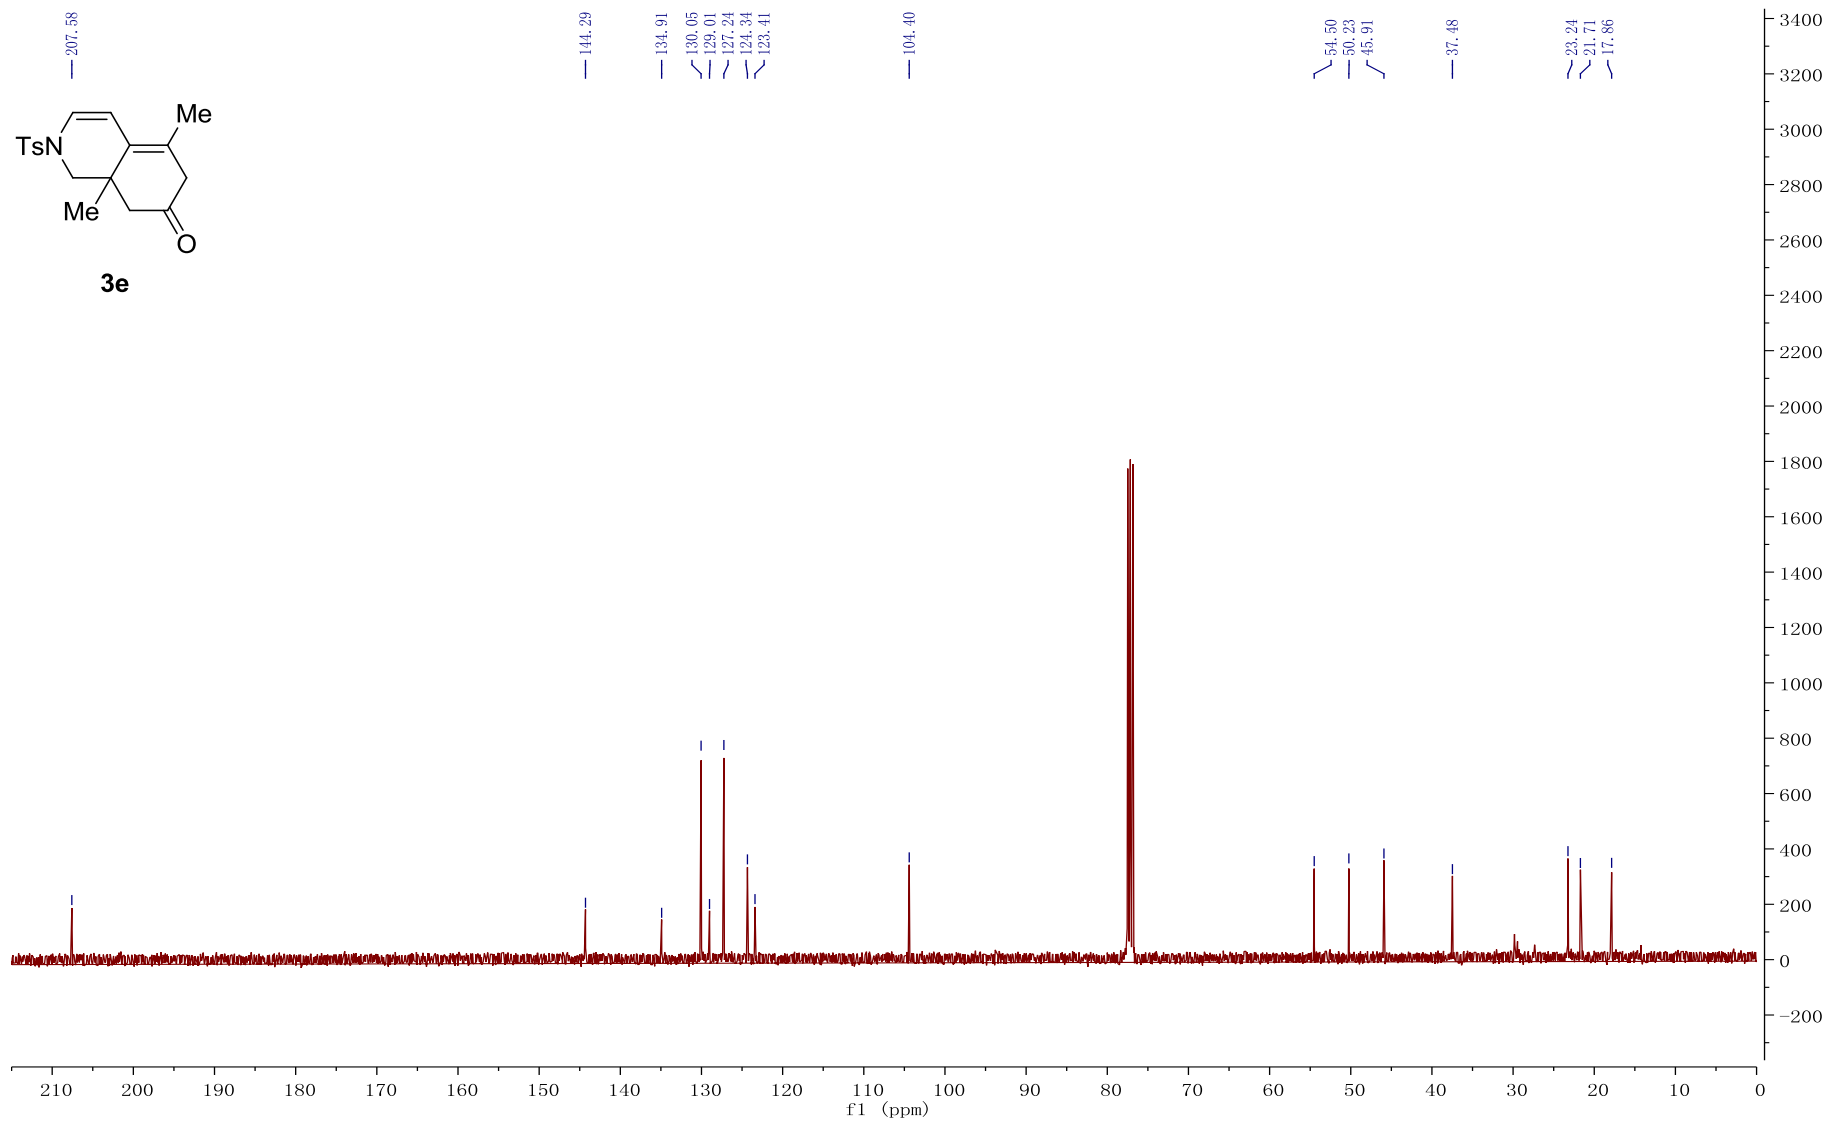

S119

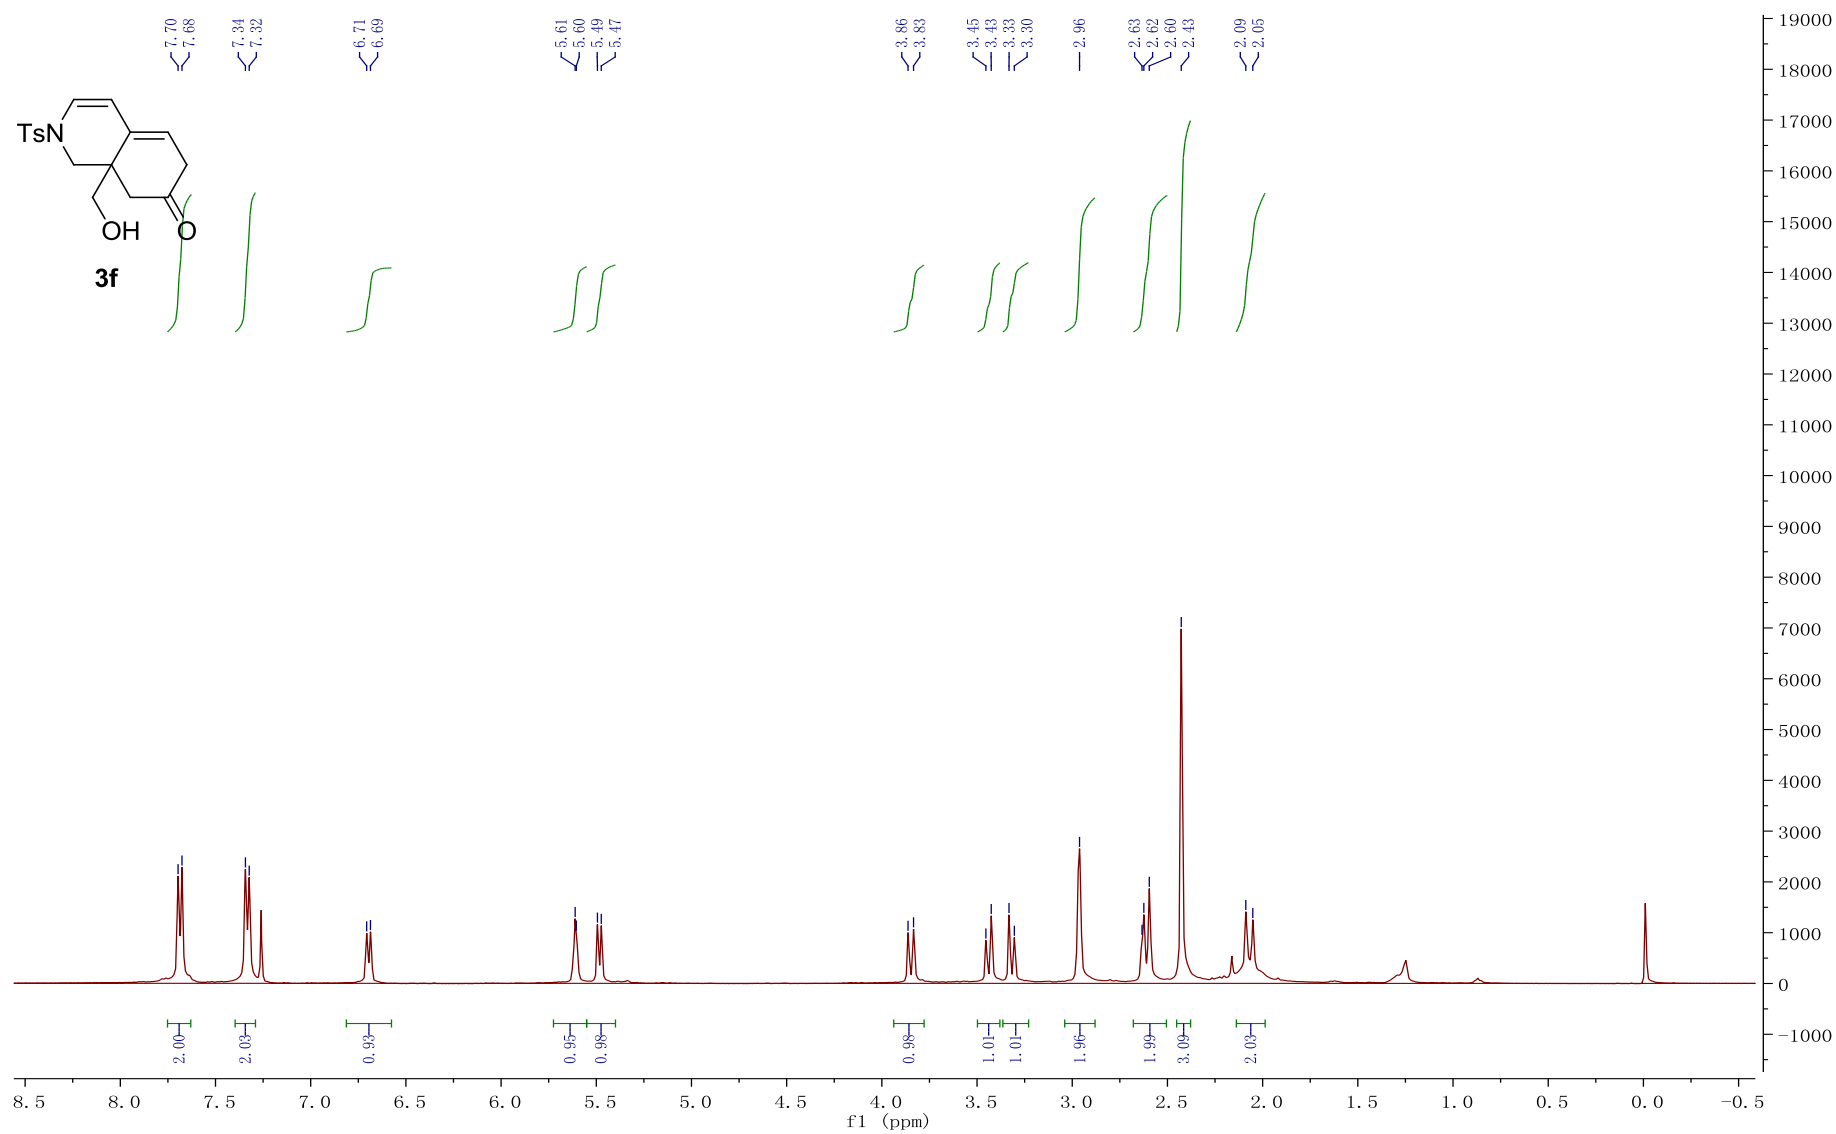

S120

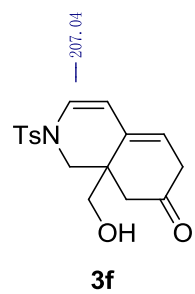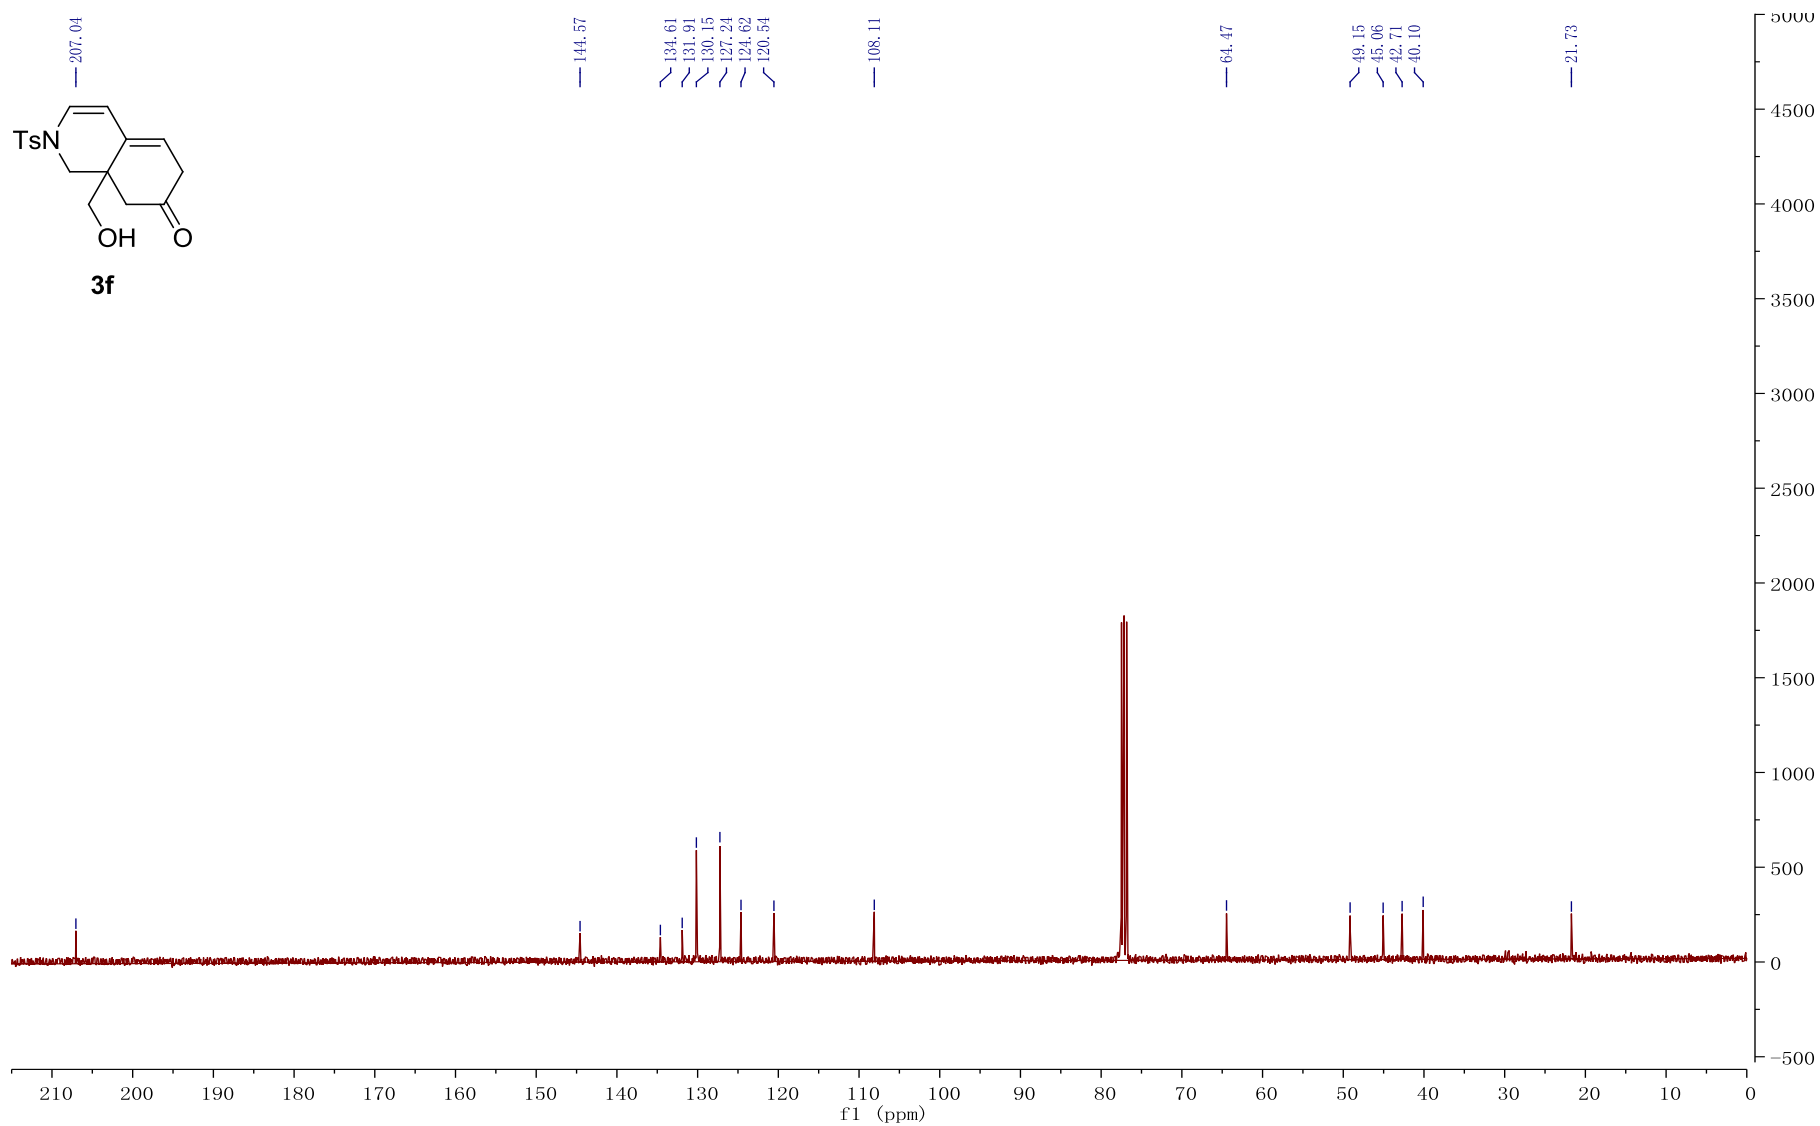

S121

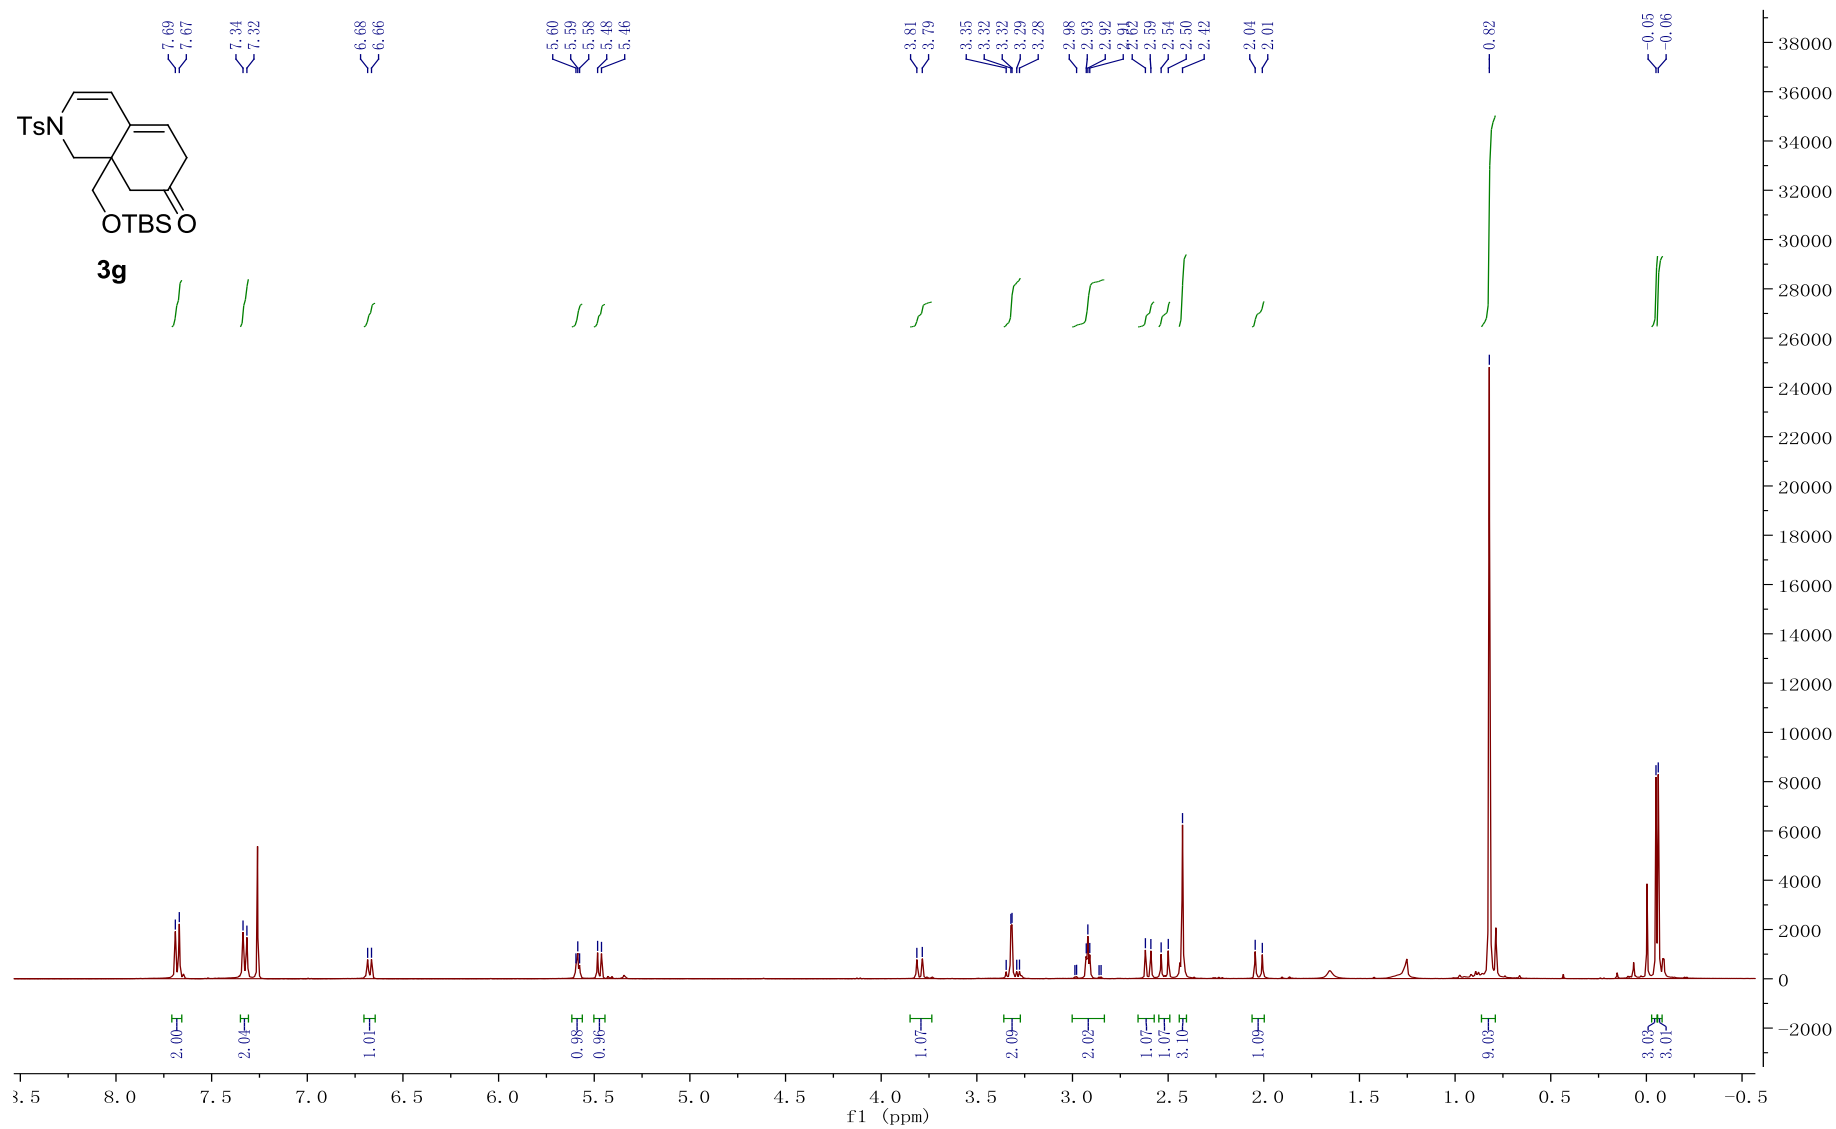

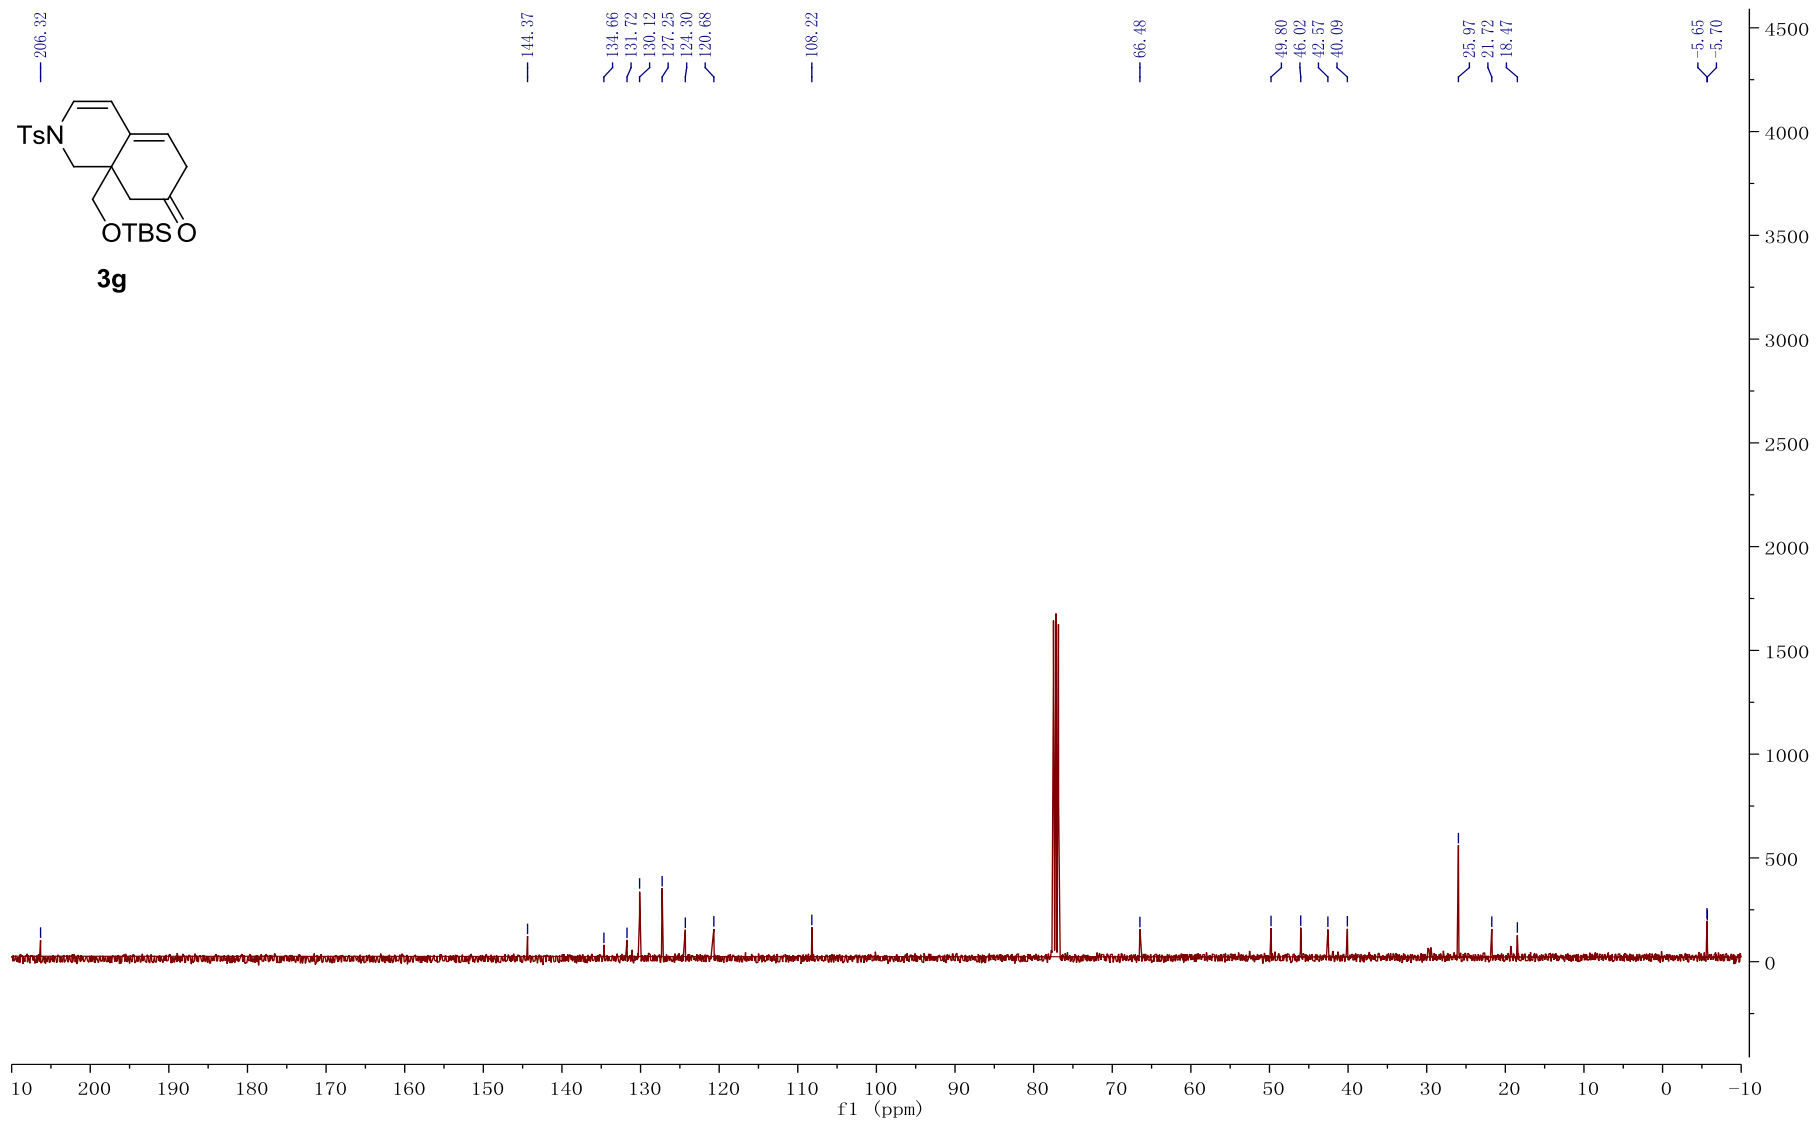

S123

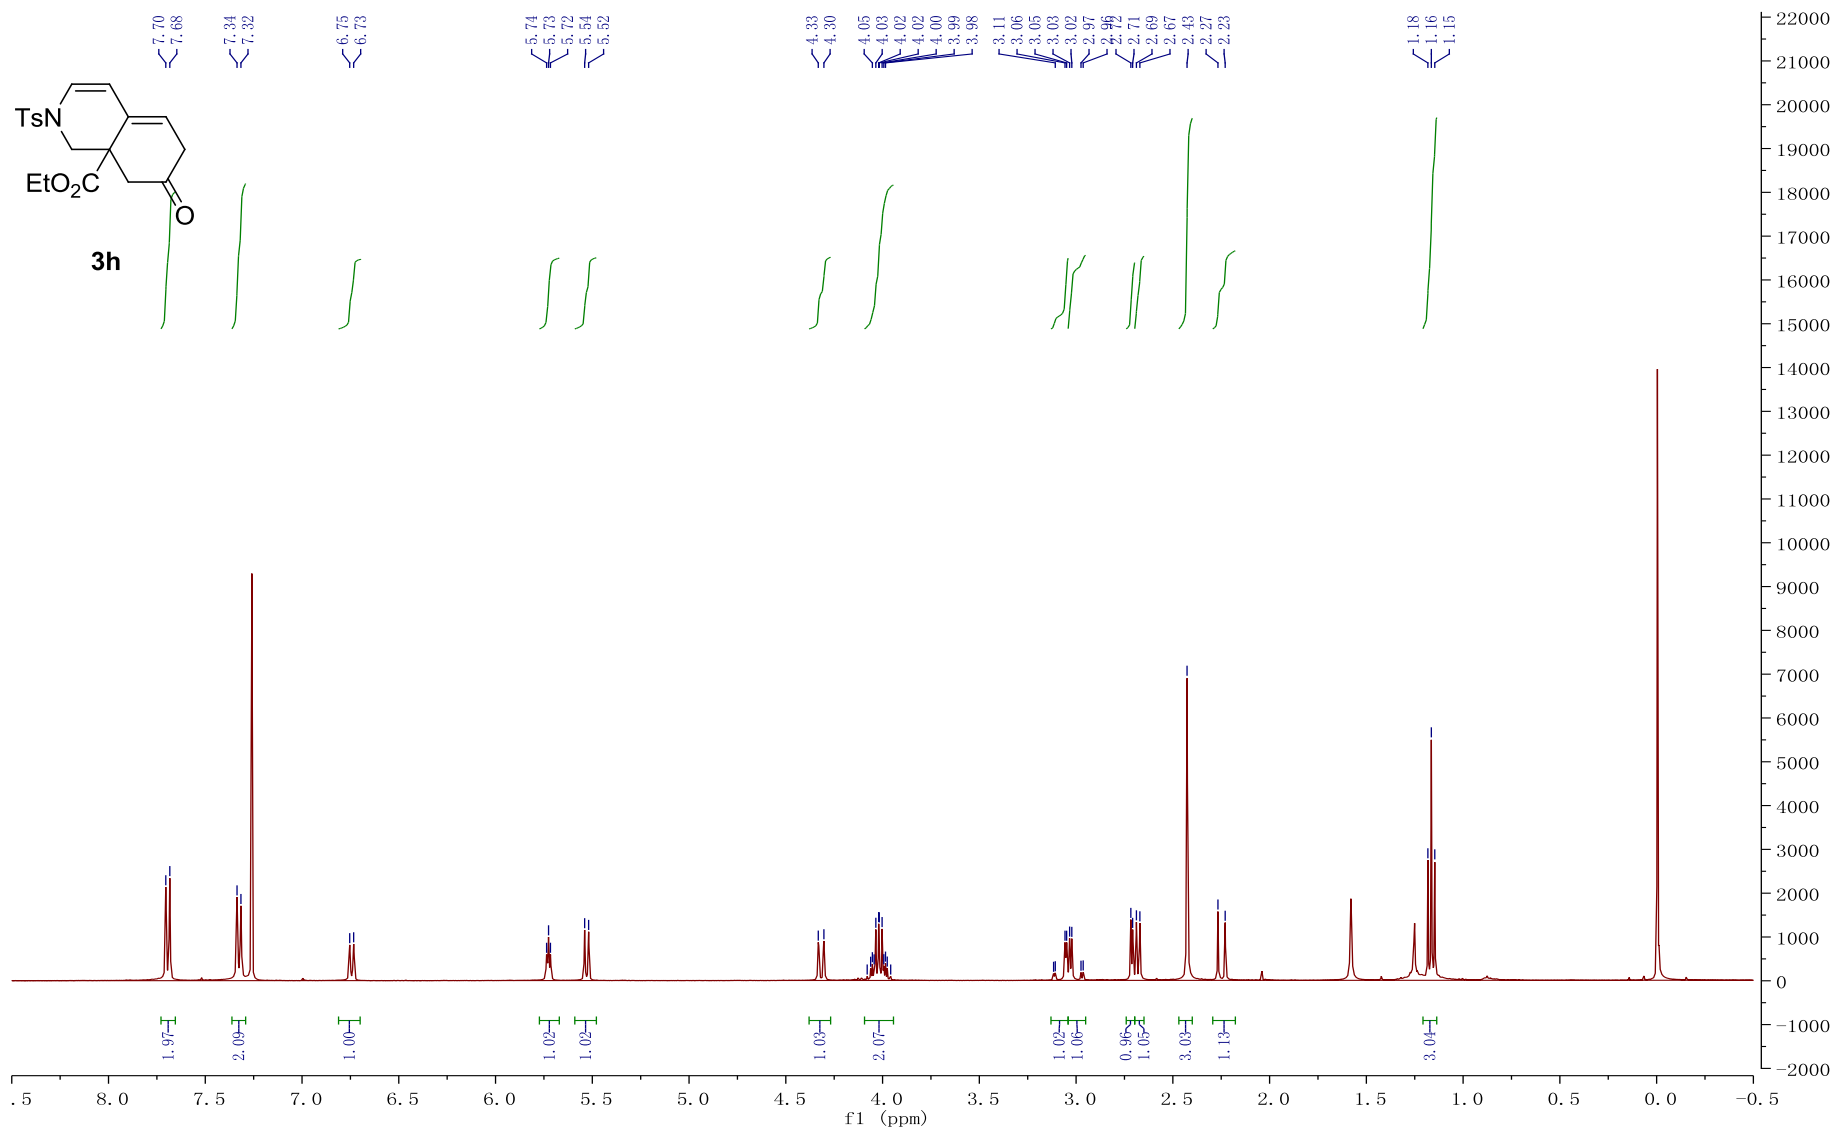

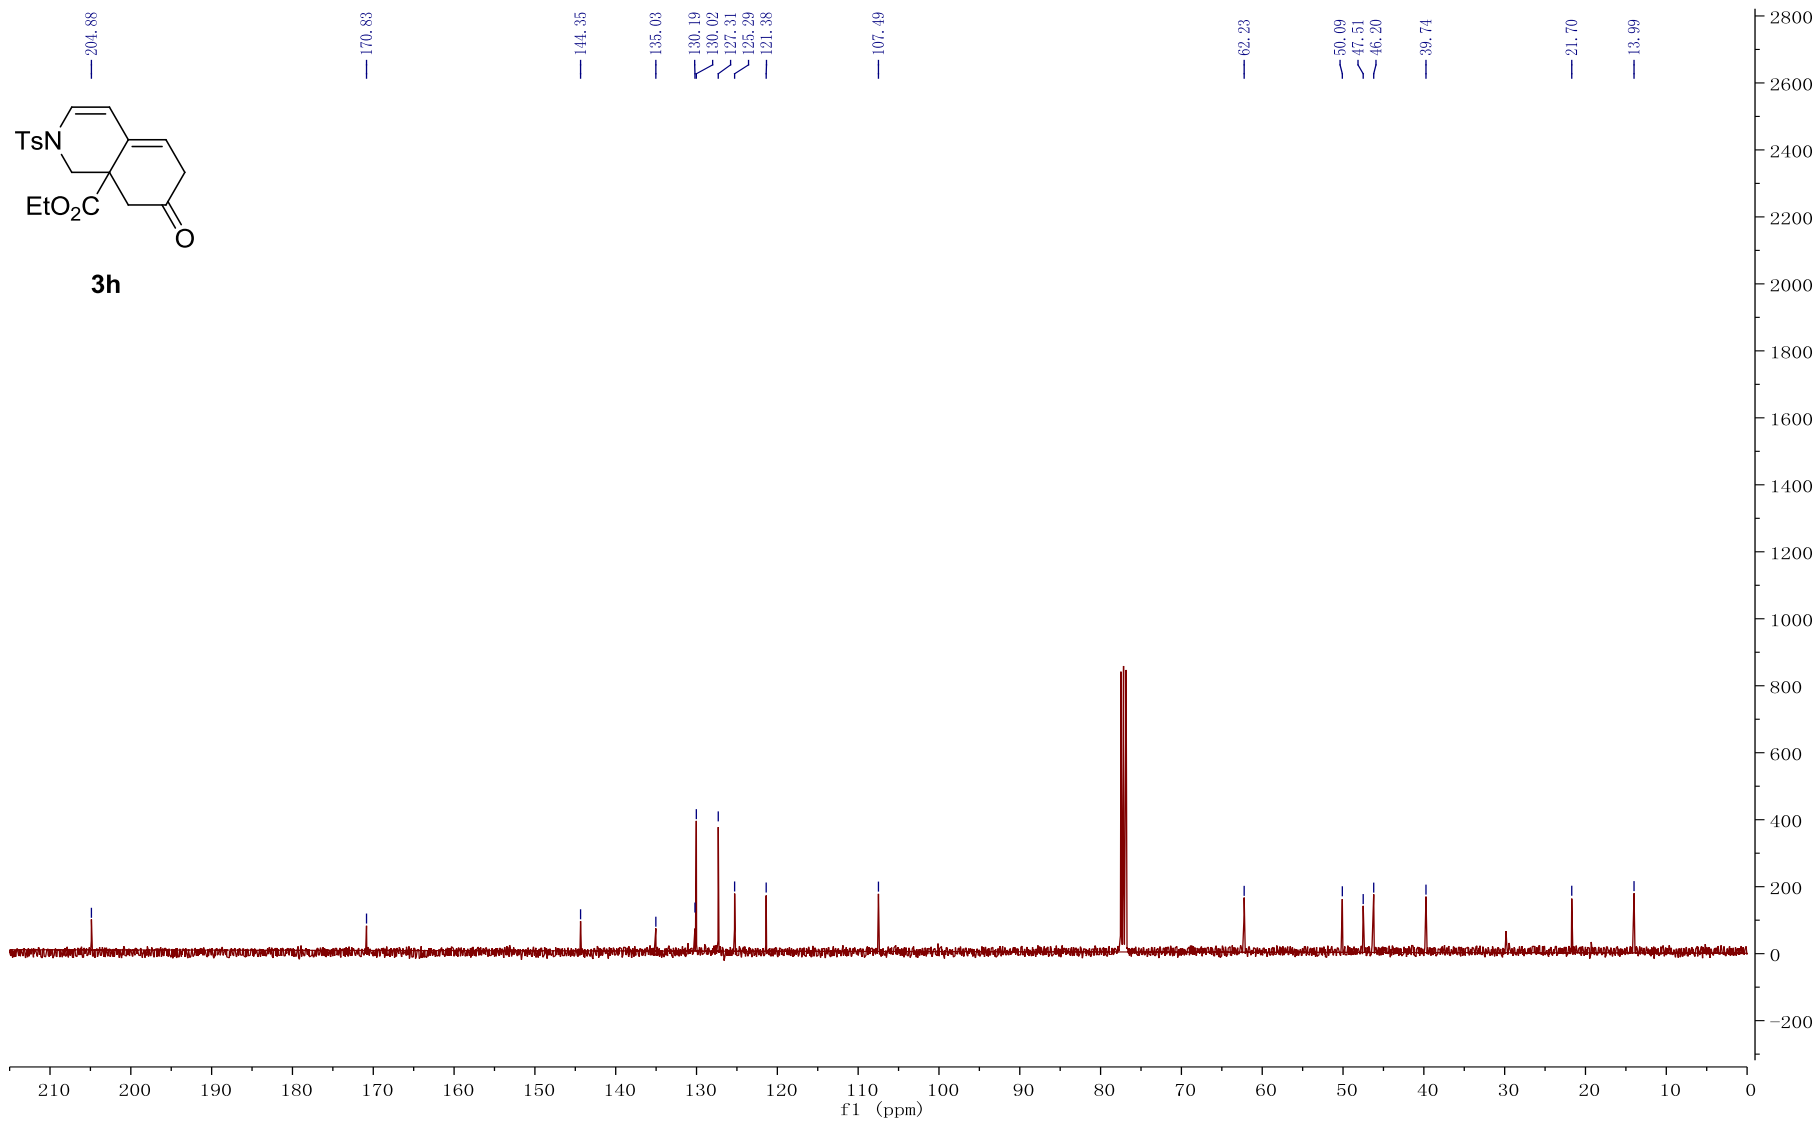

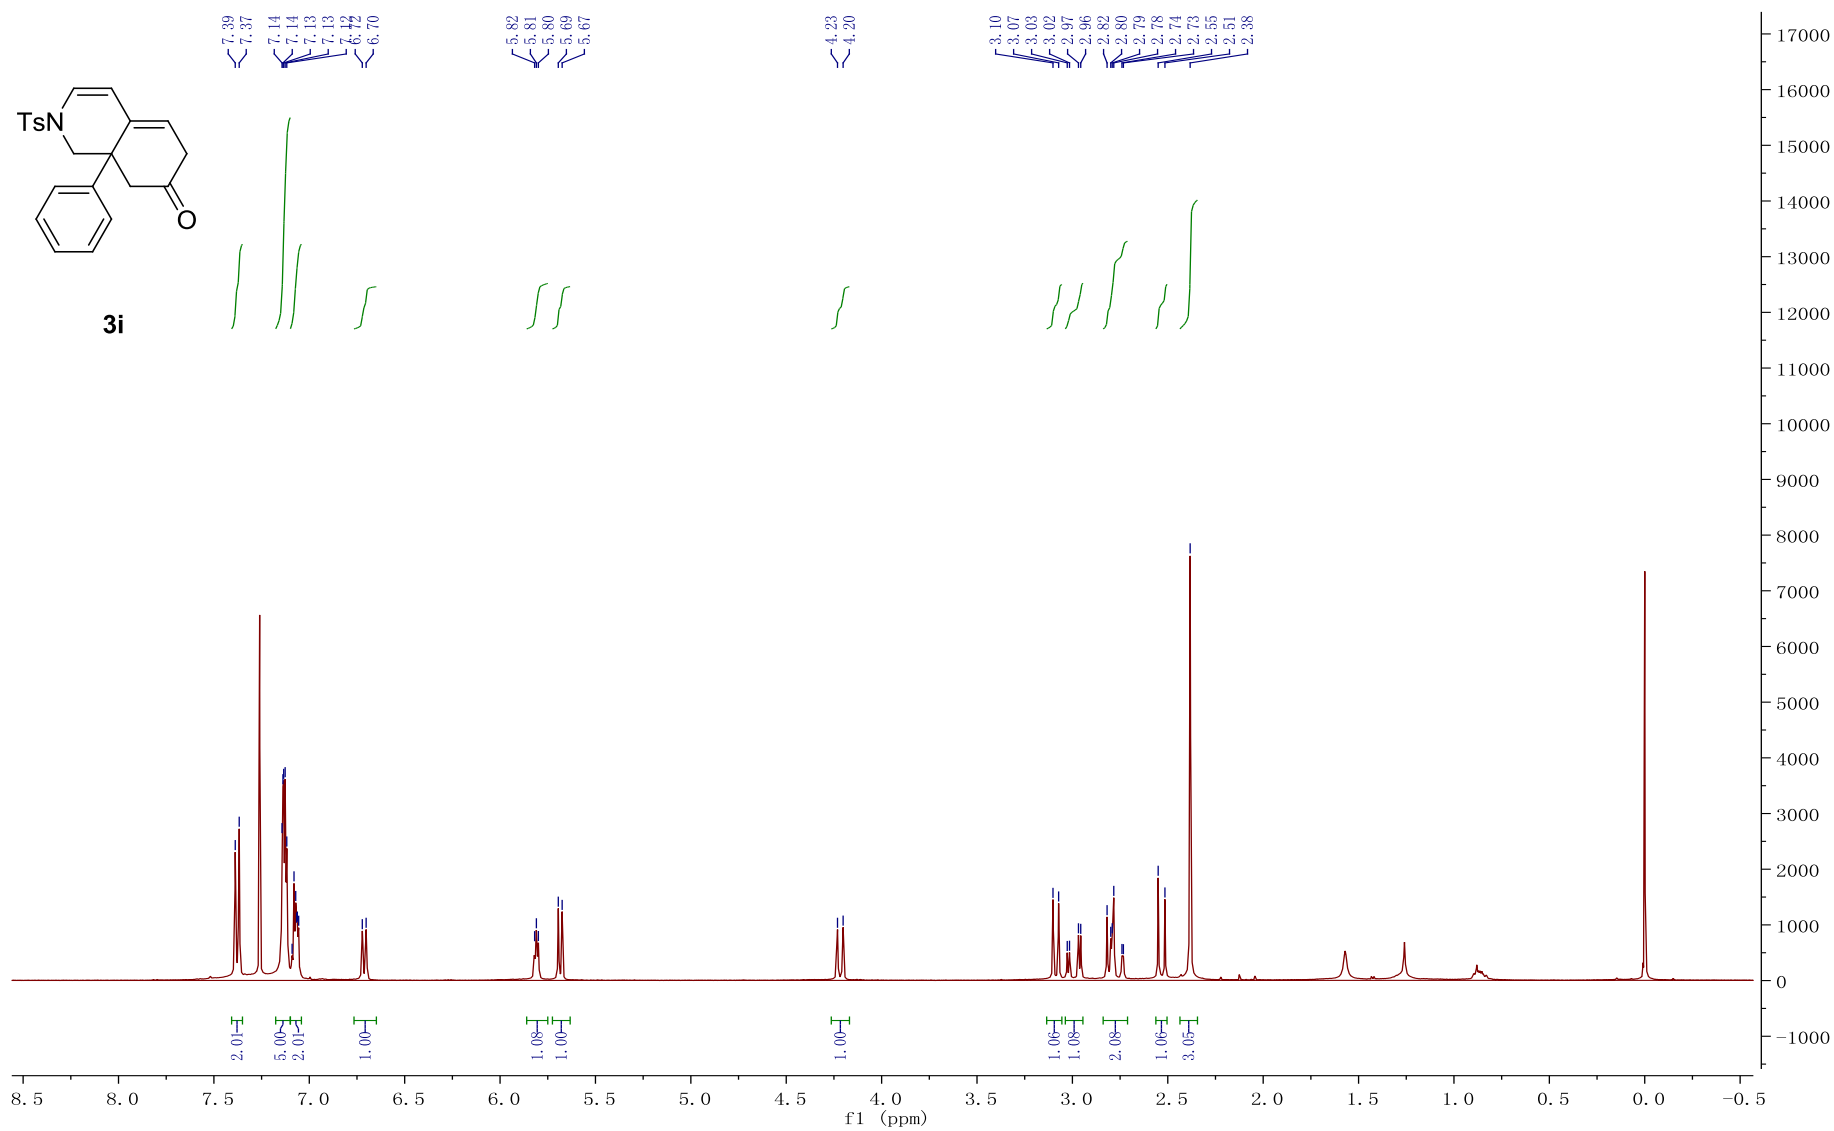

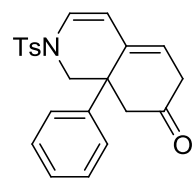

**3i**

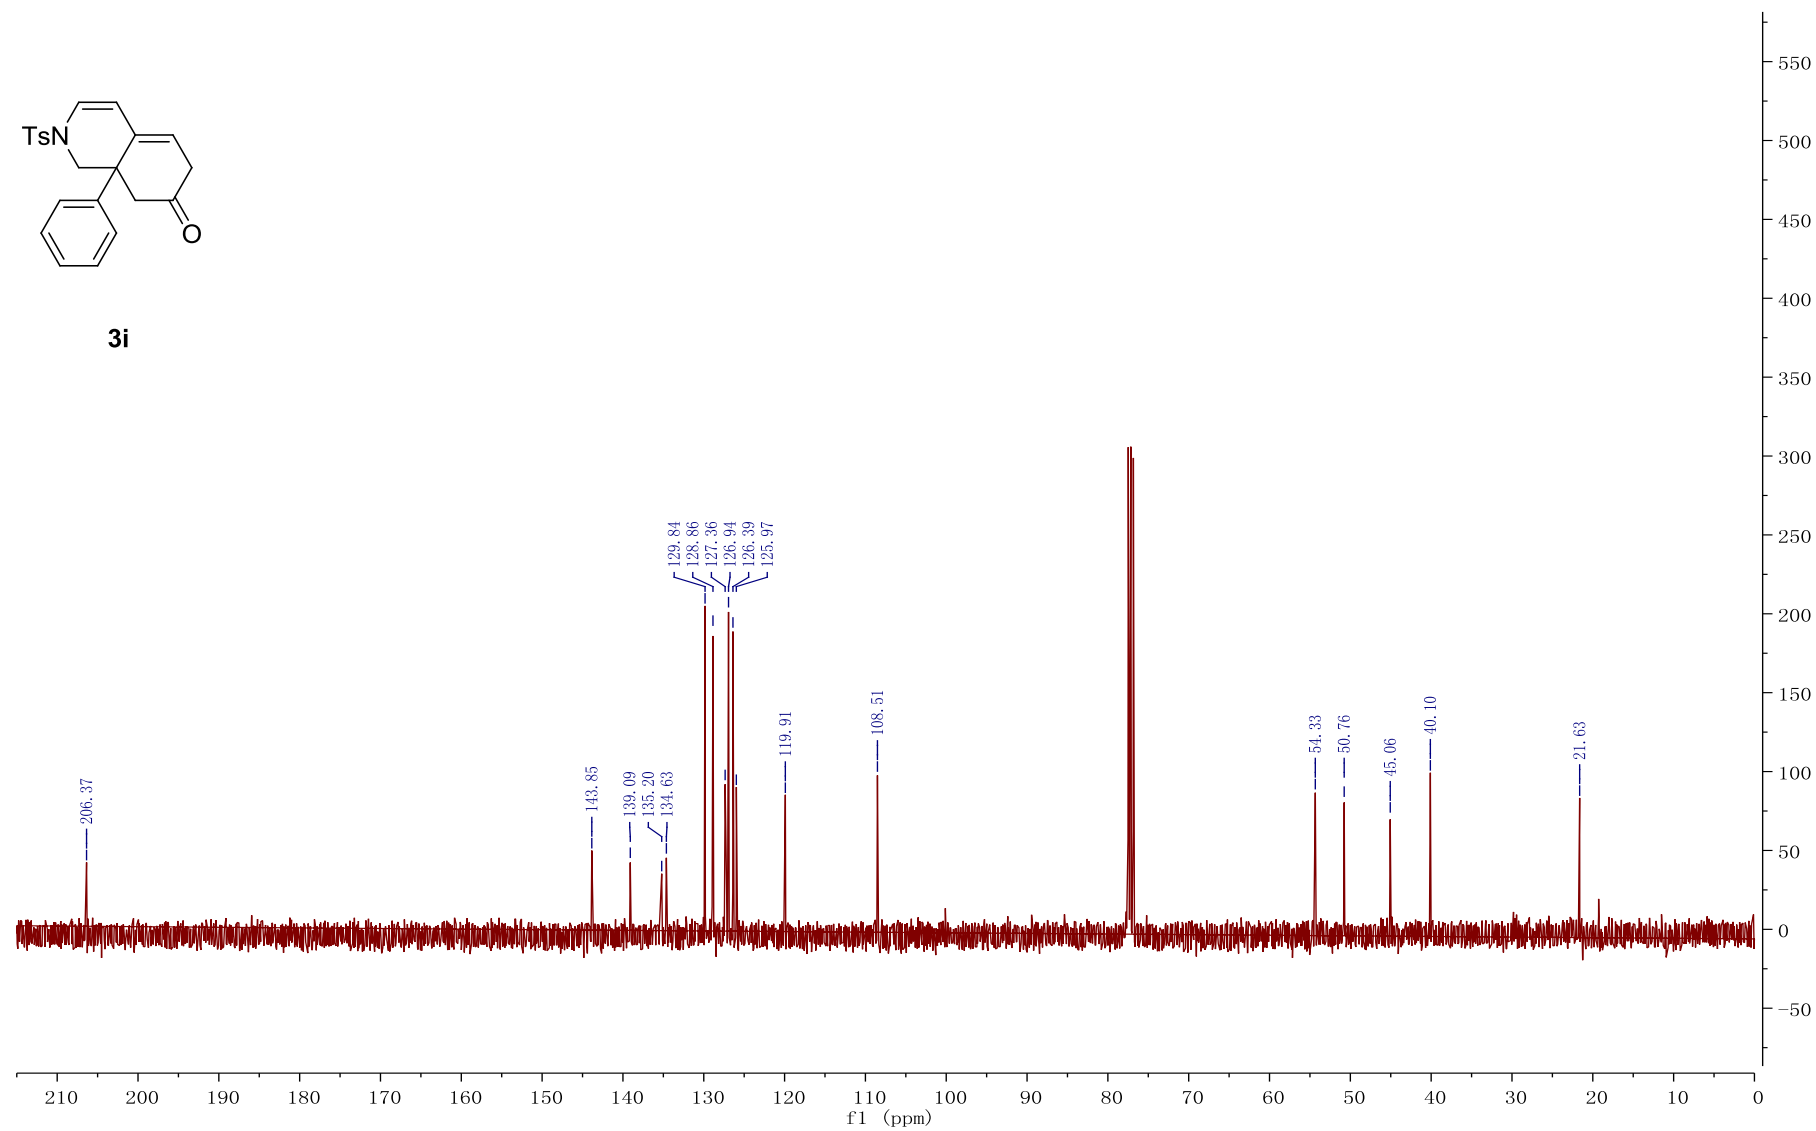

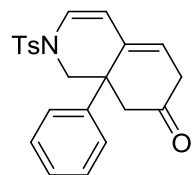

3i

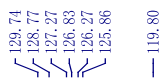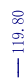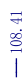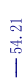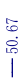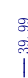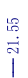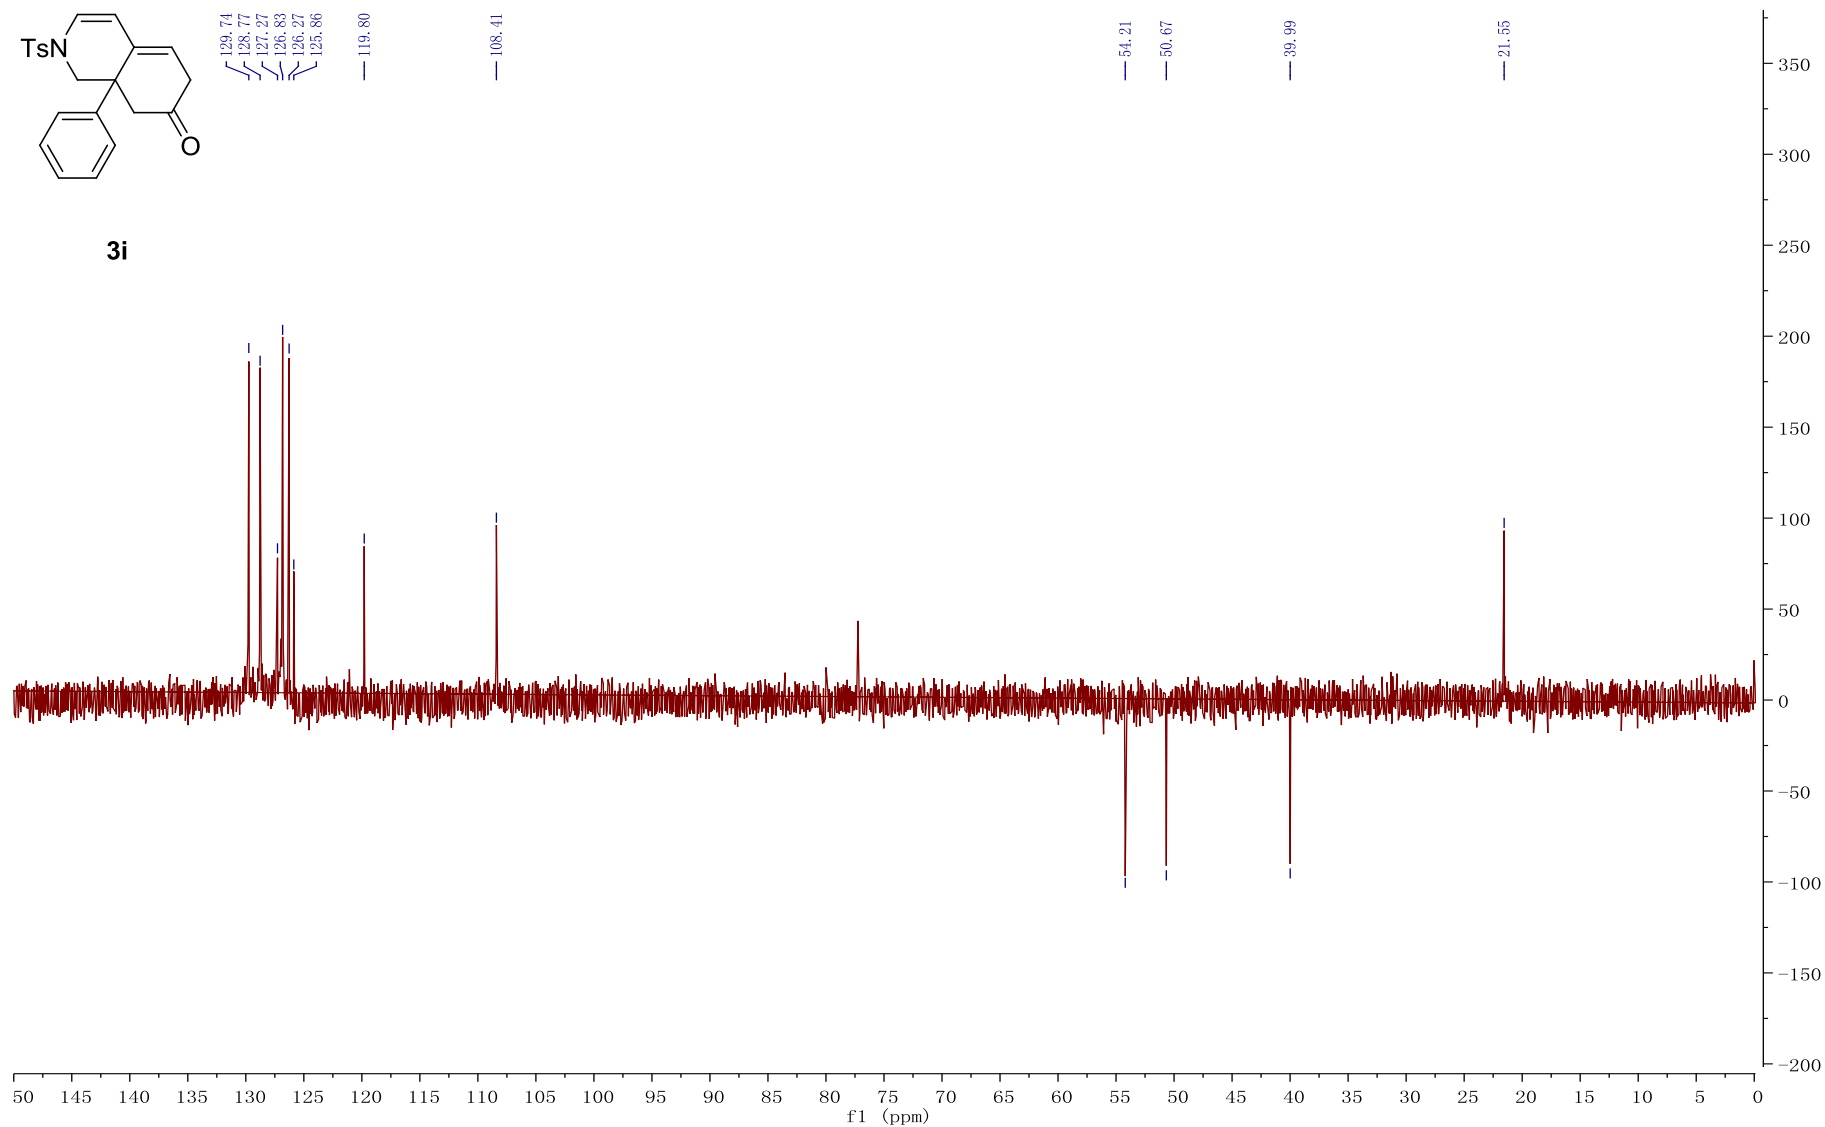

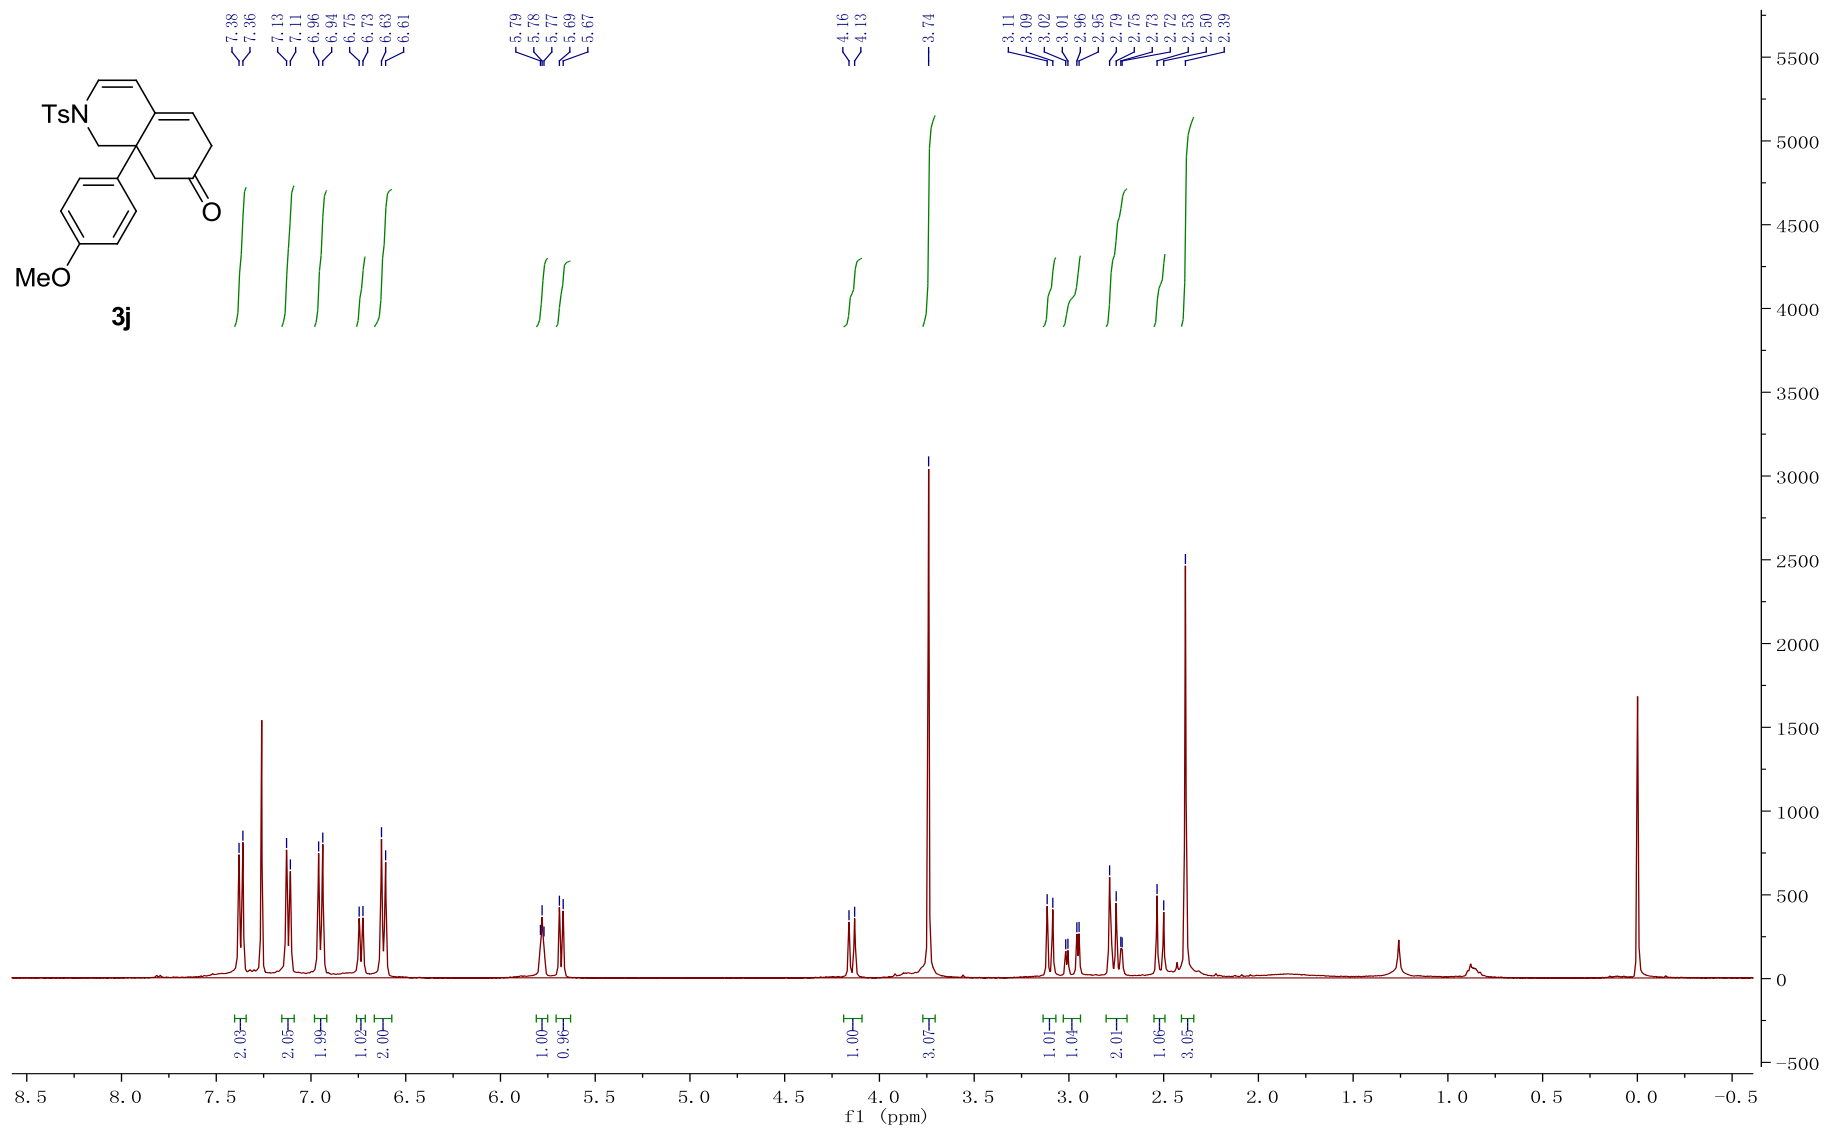

S129

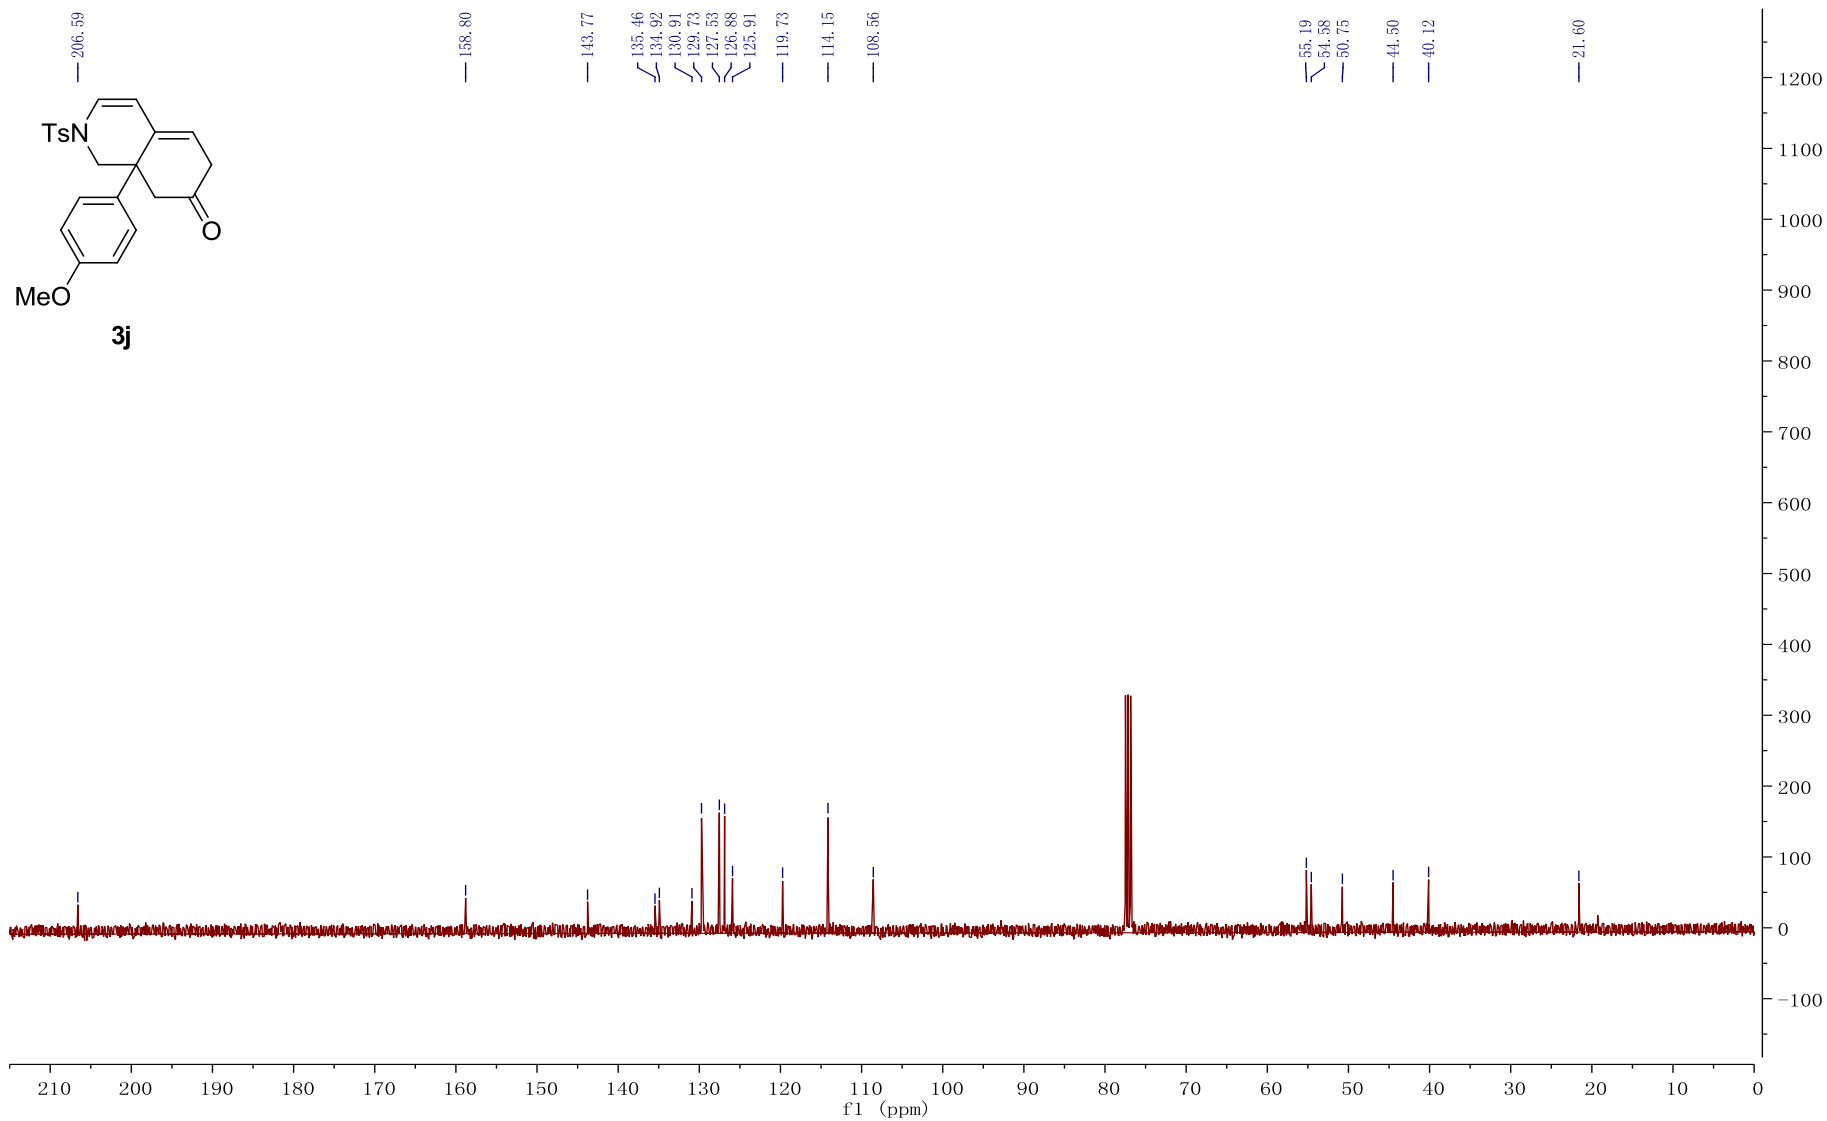

S130

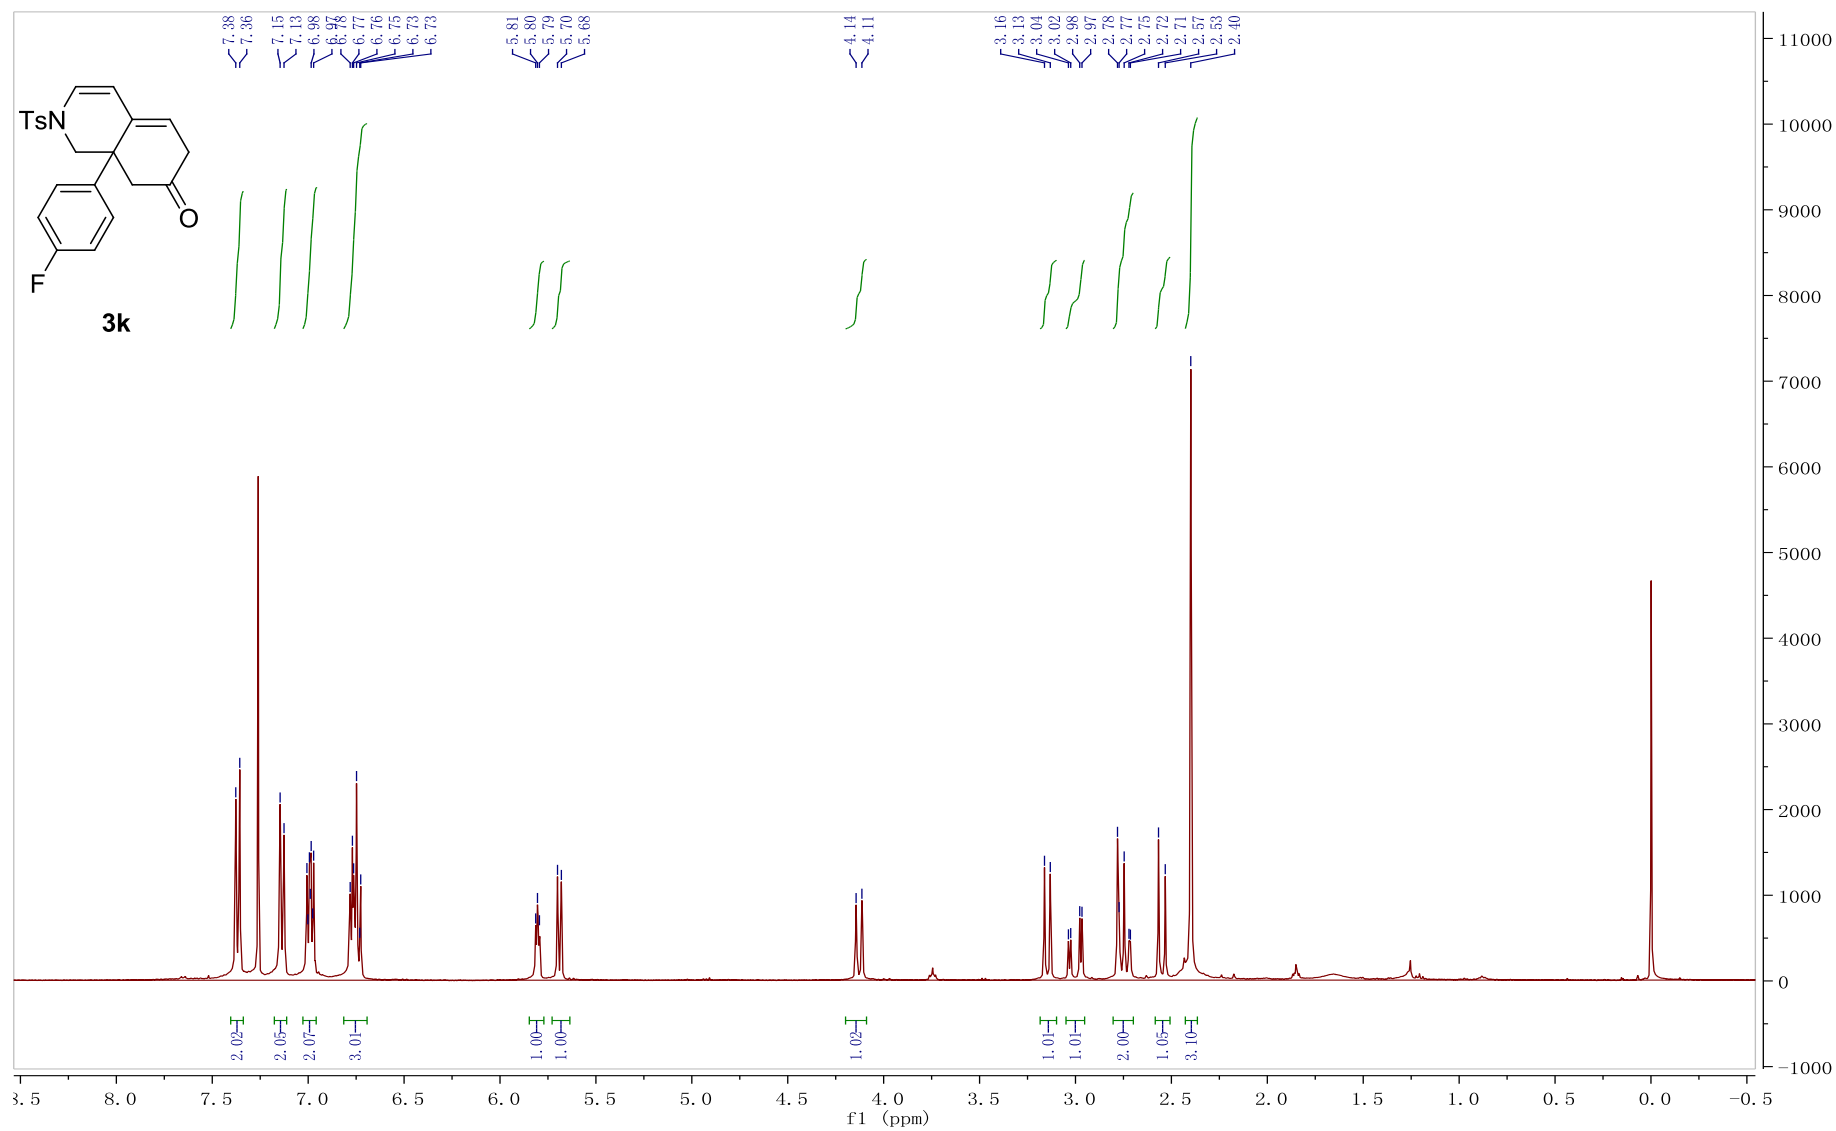

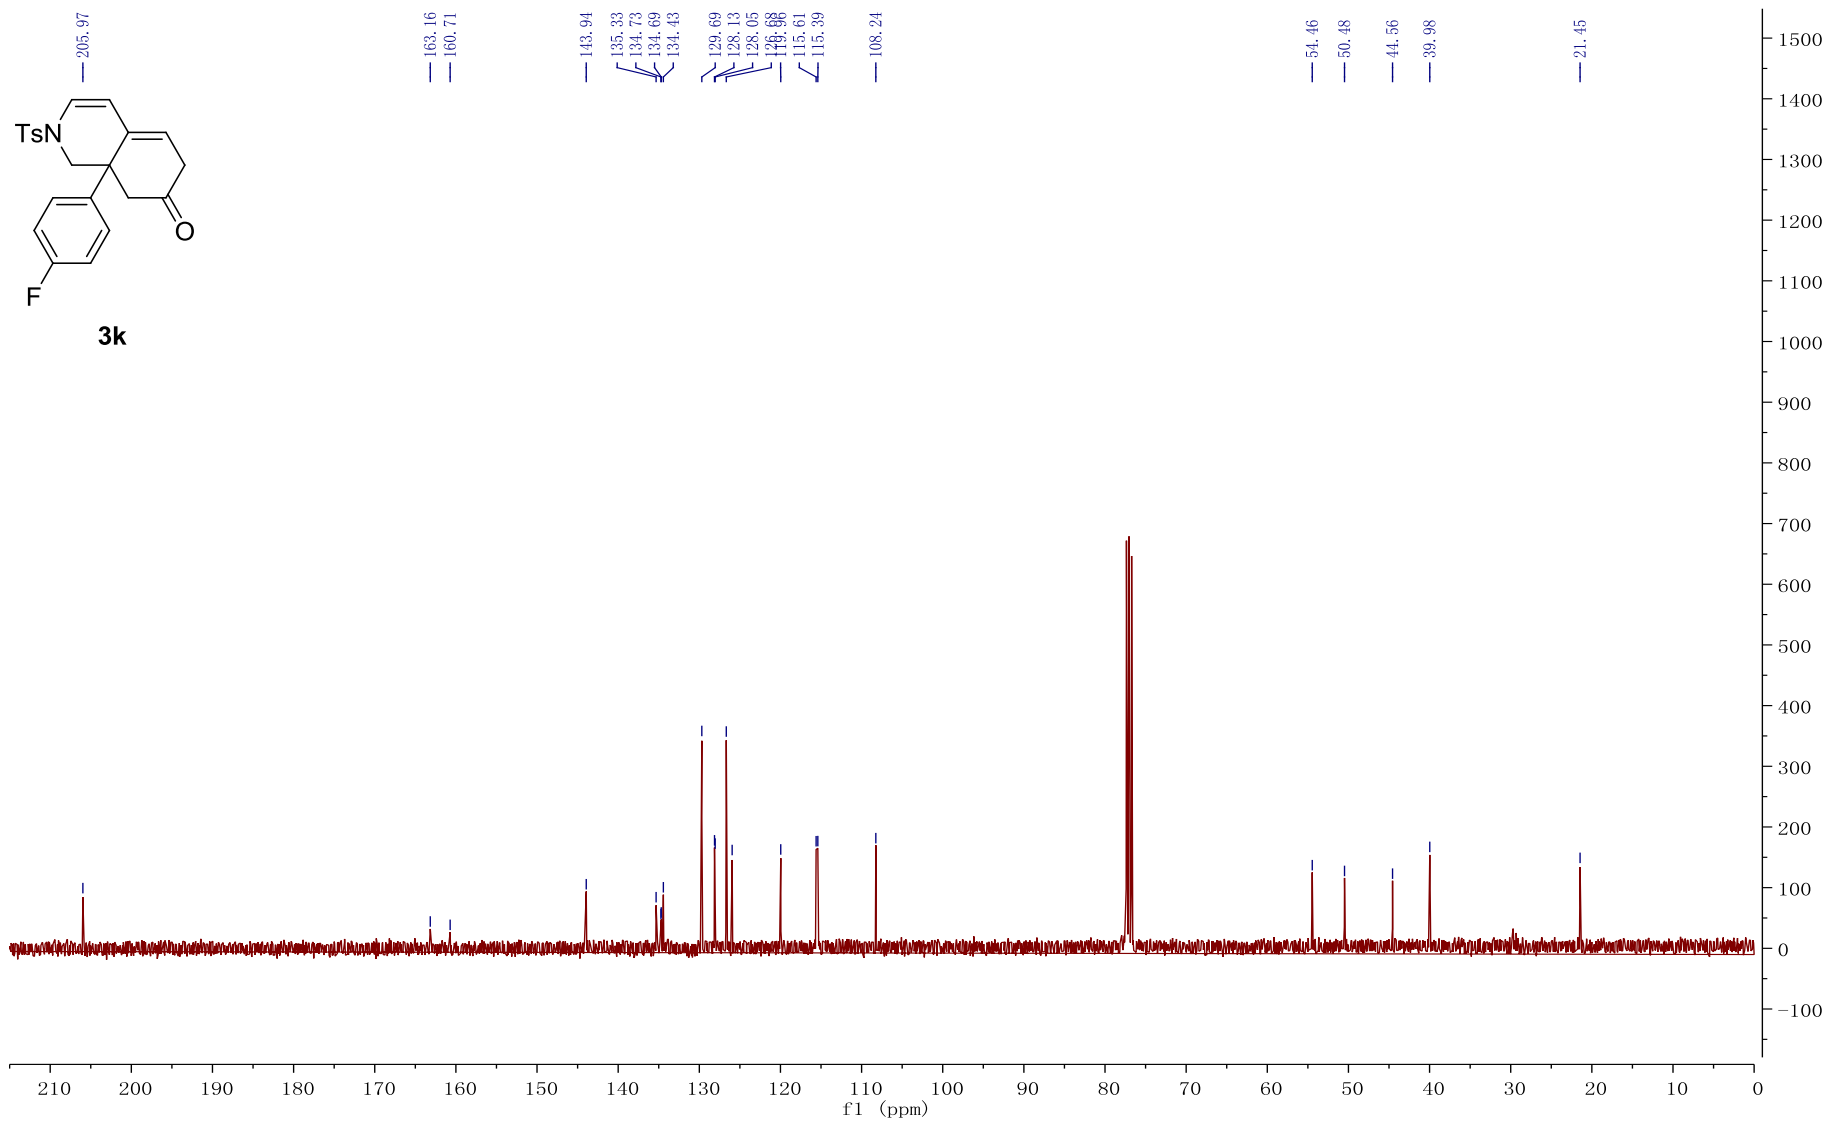

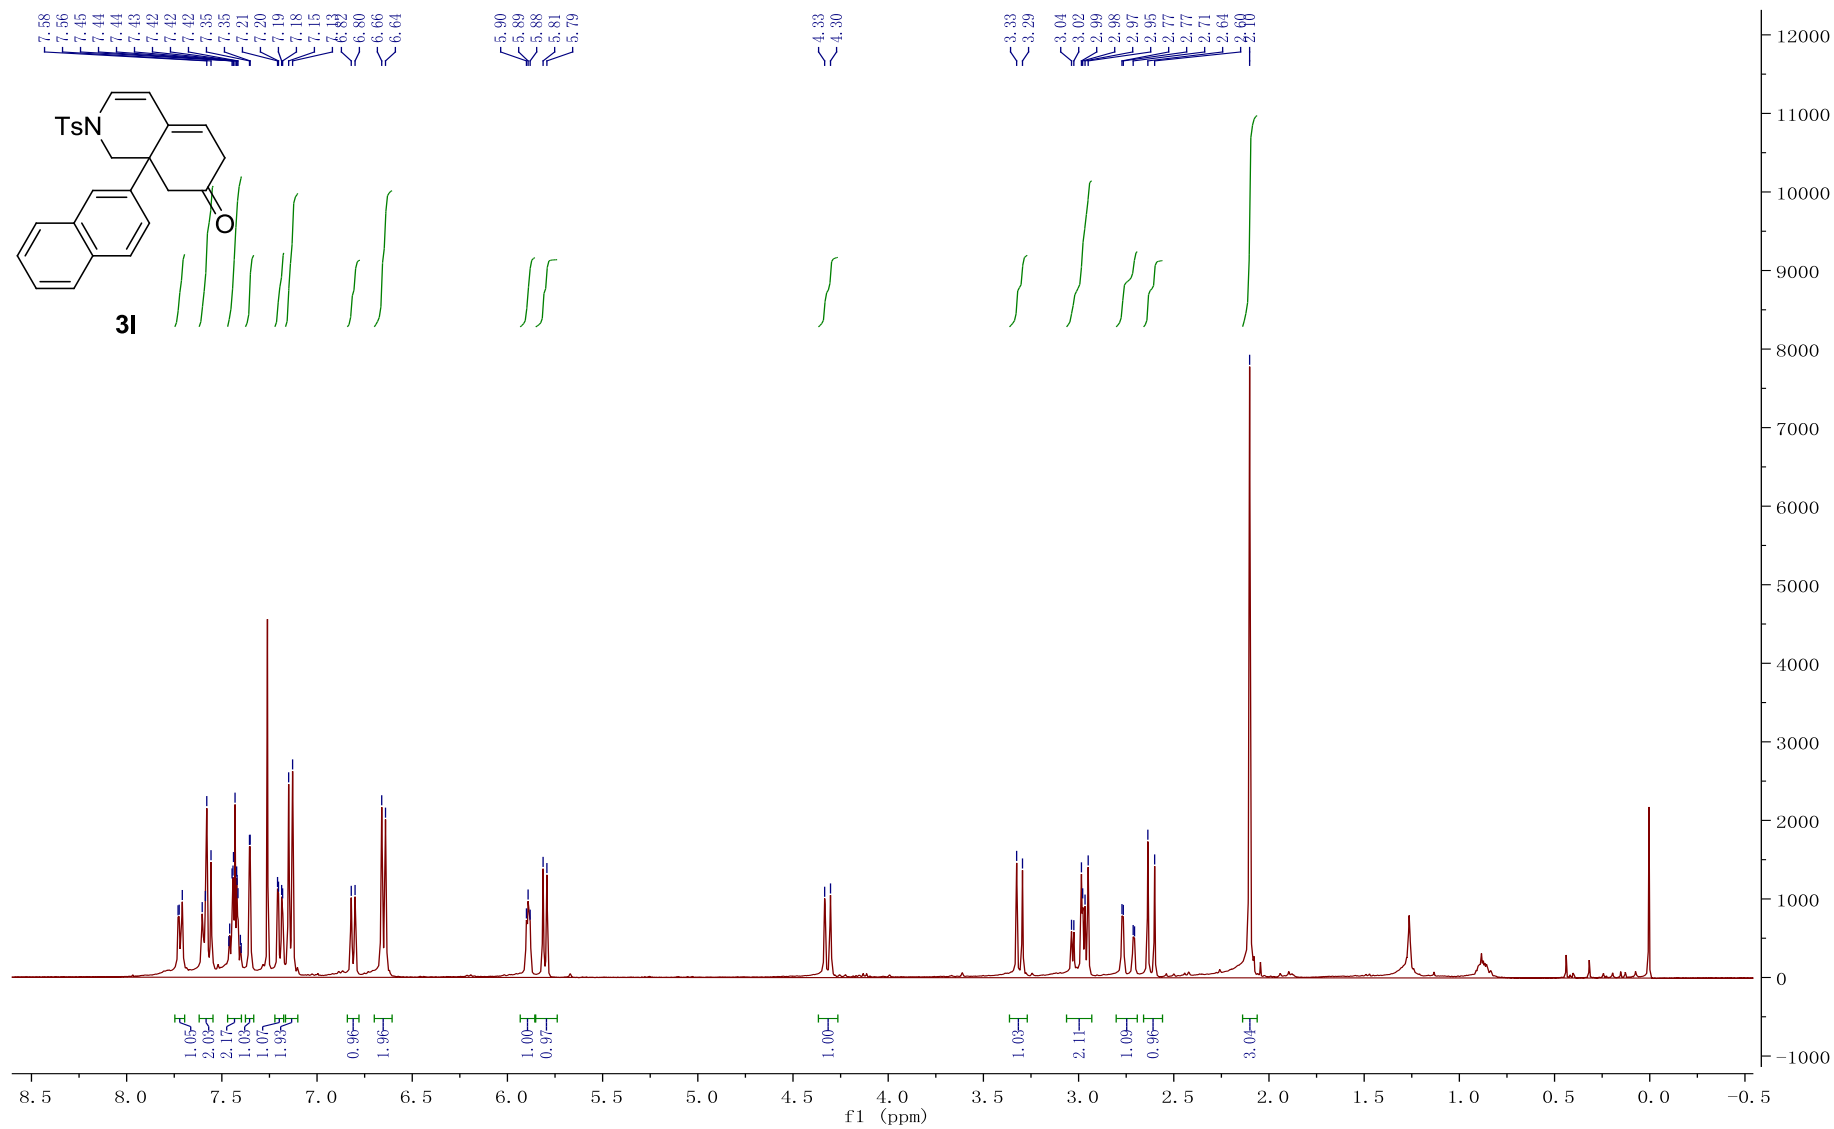

S133

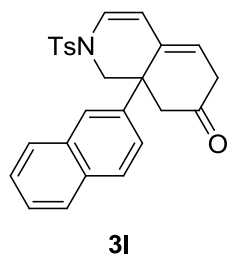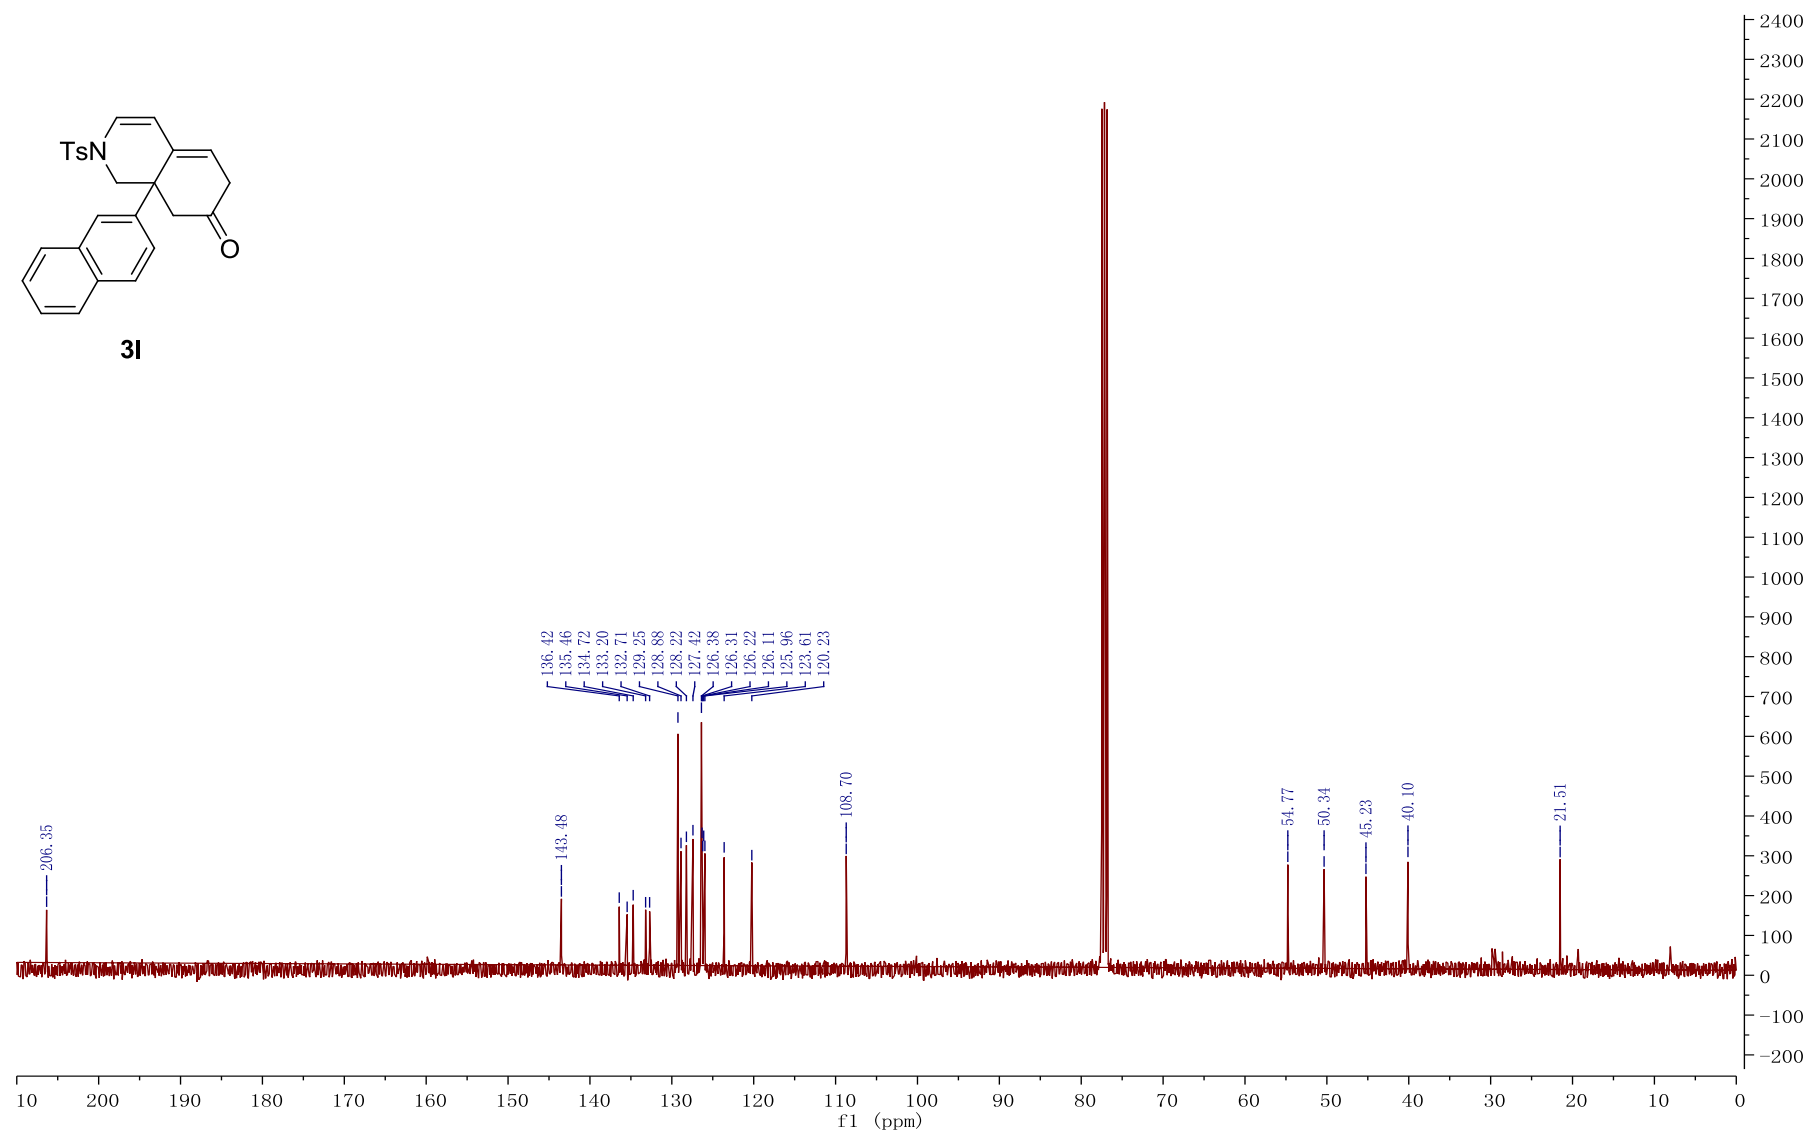

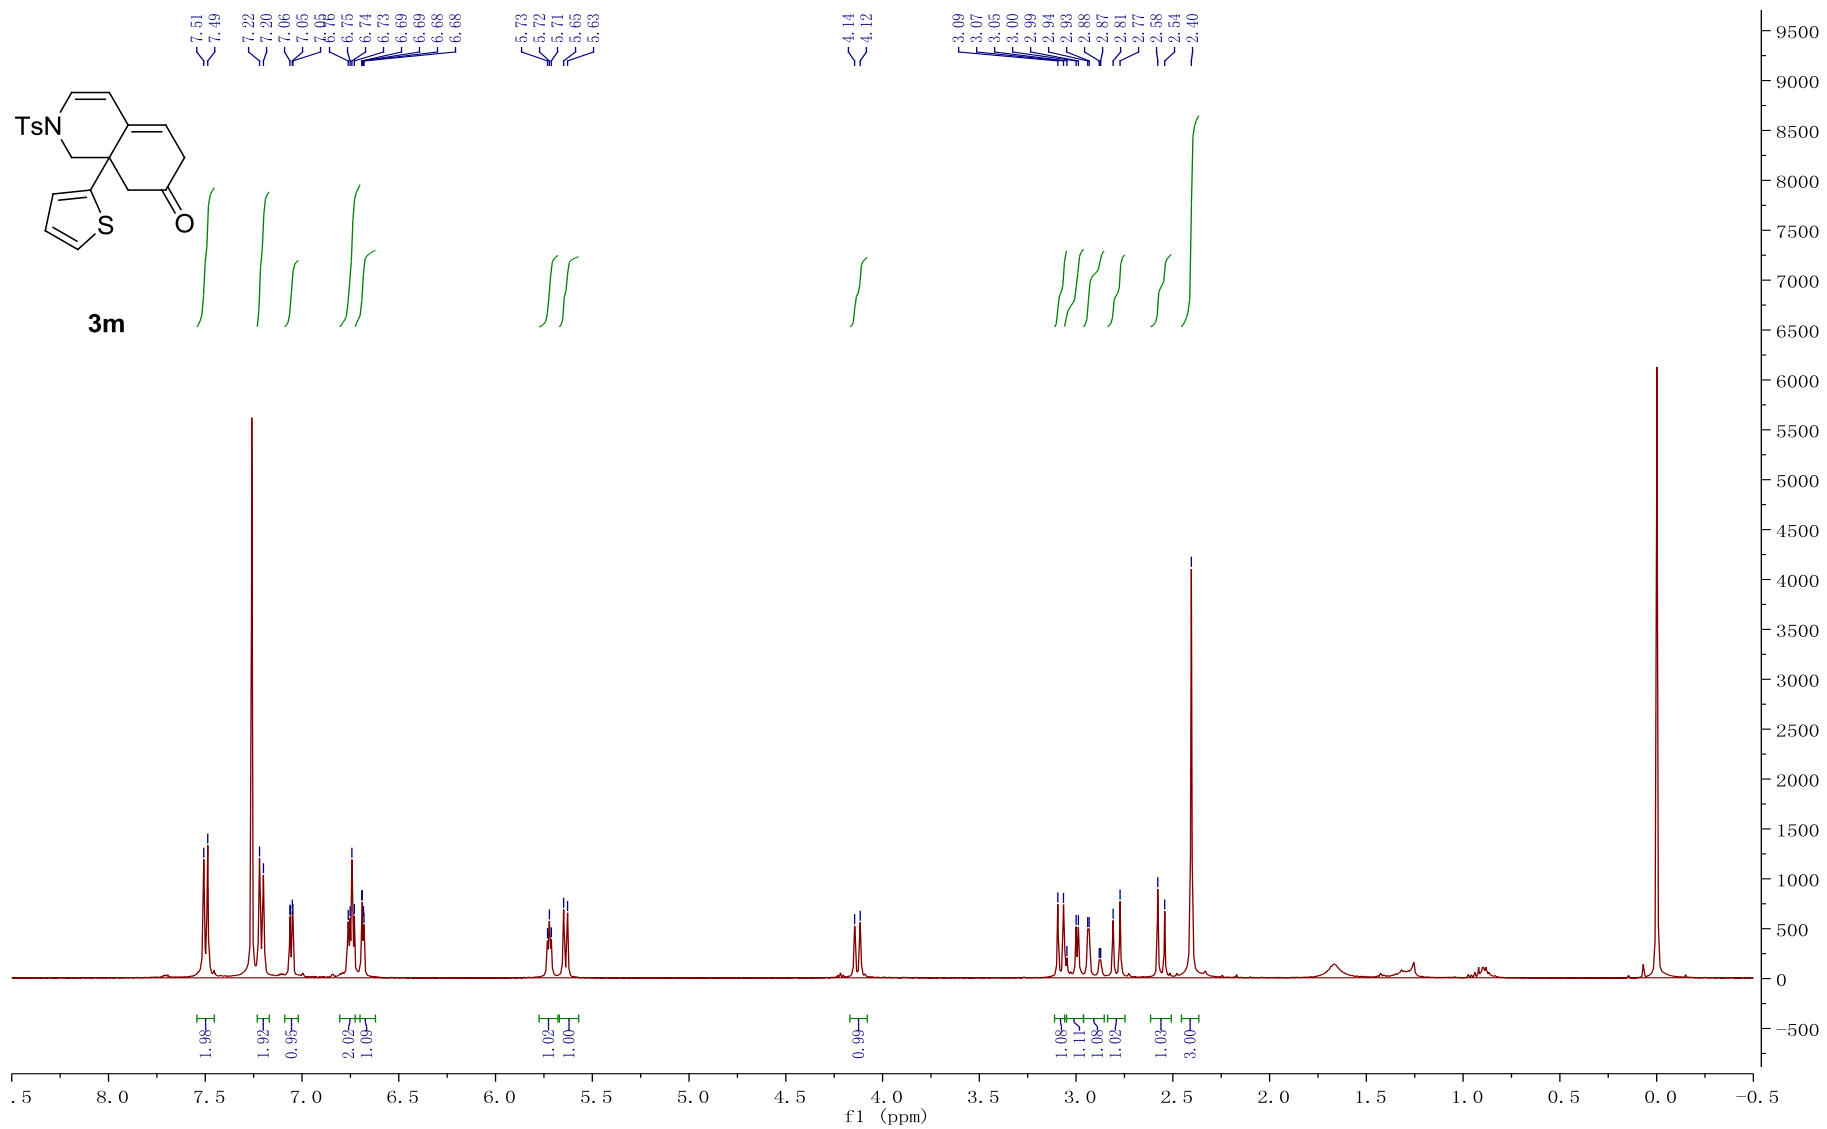

S135

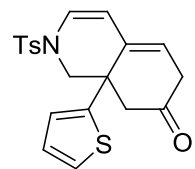

3m

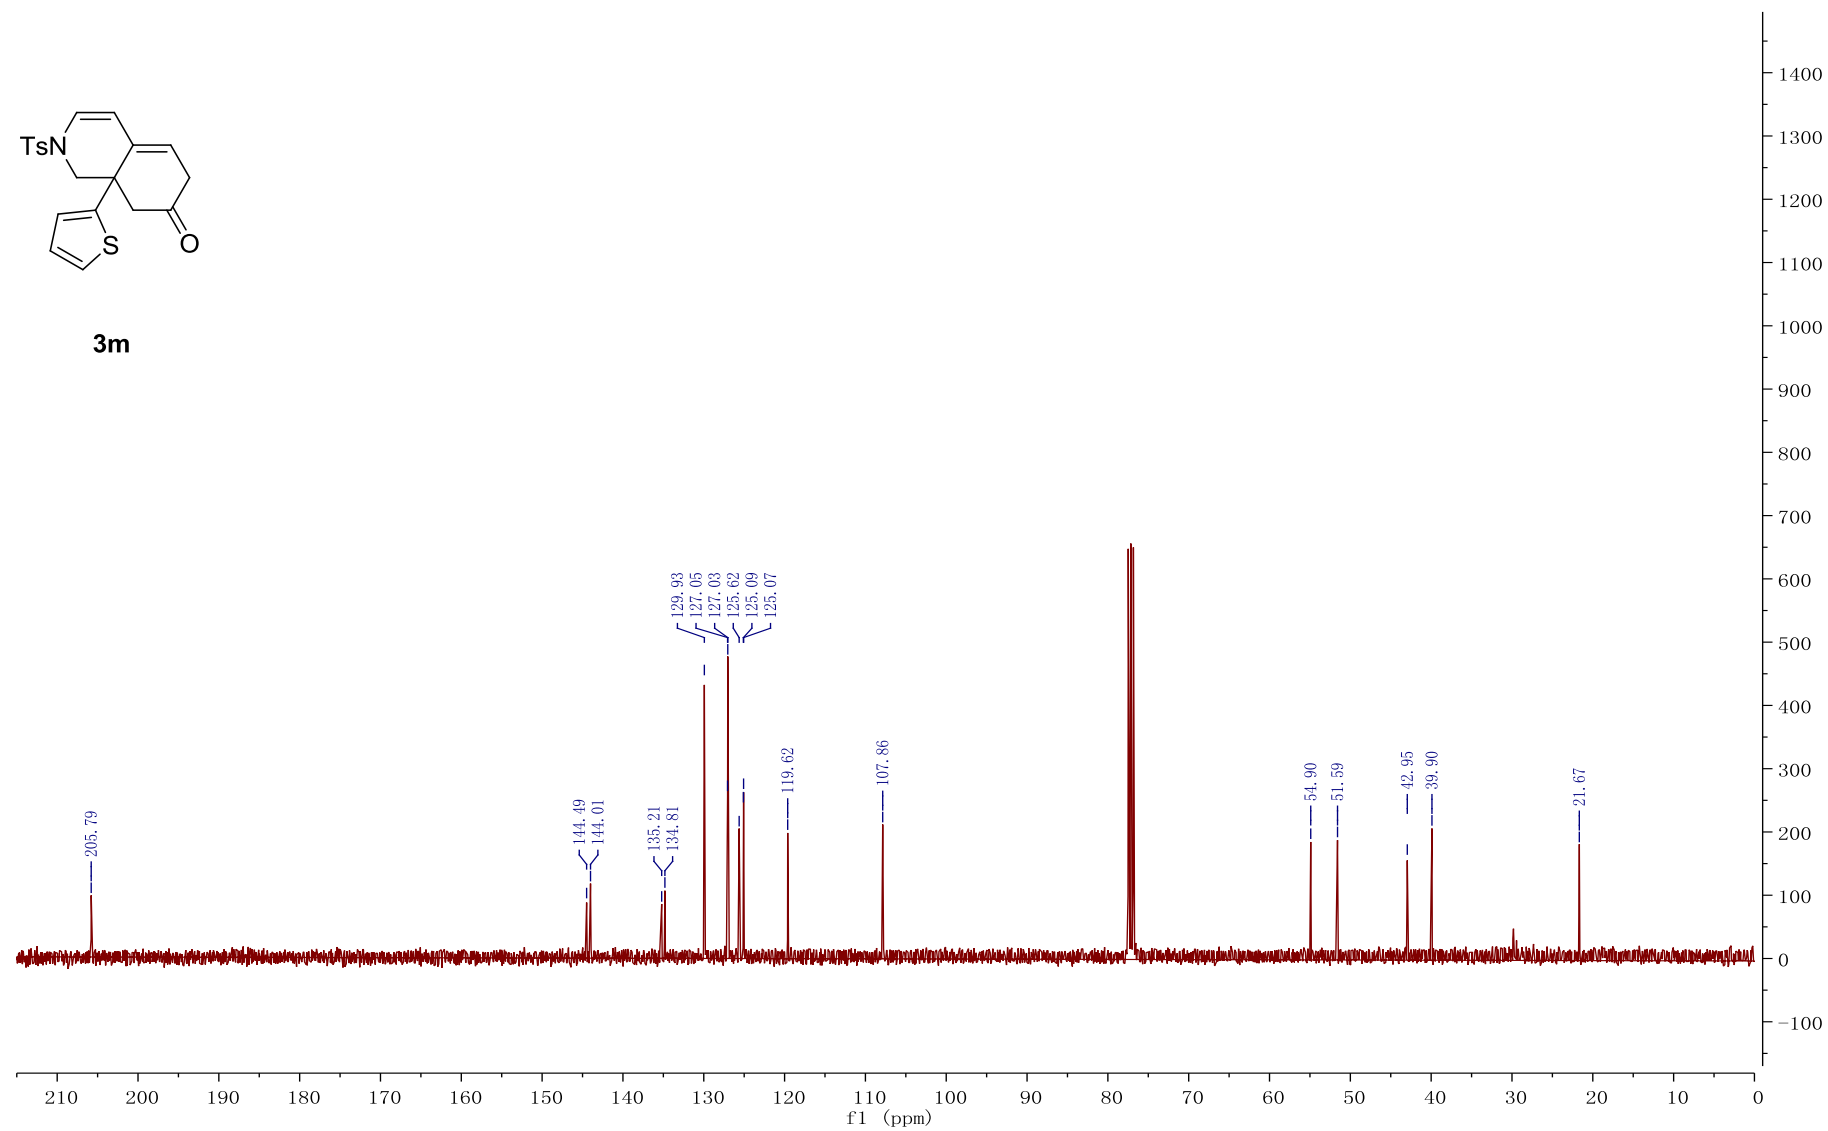

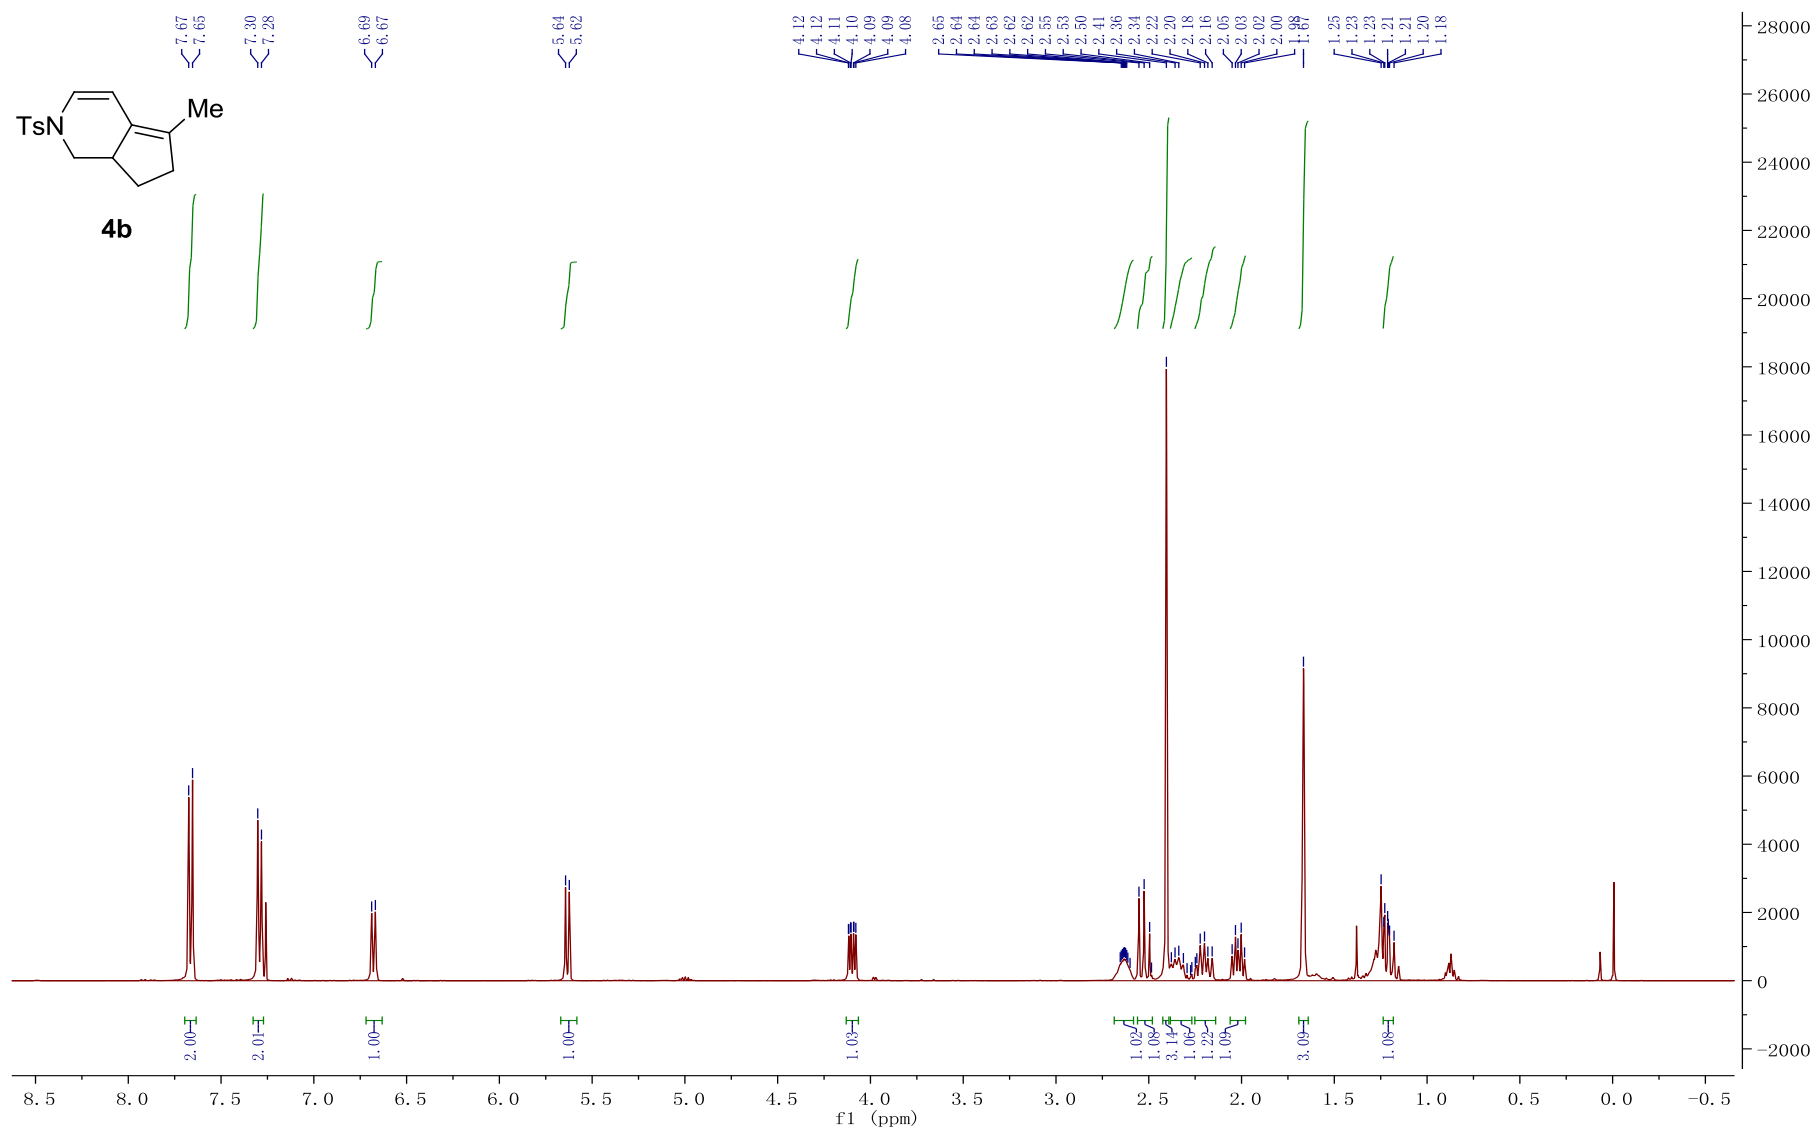

S137

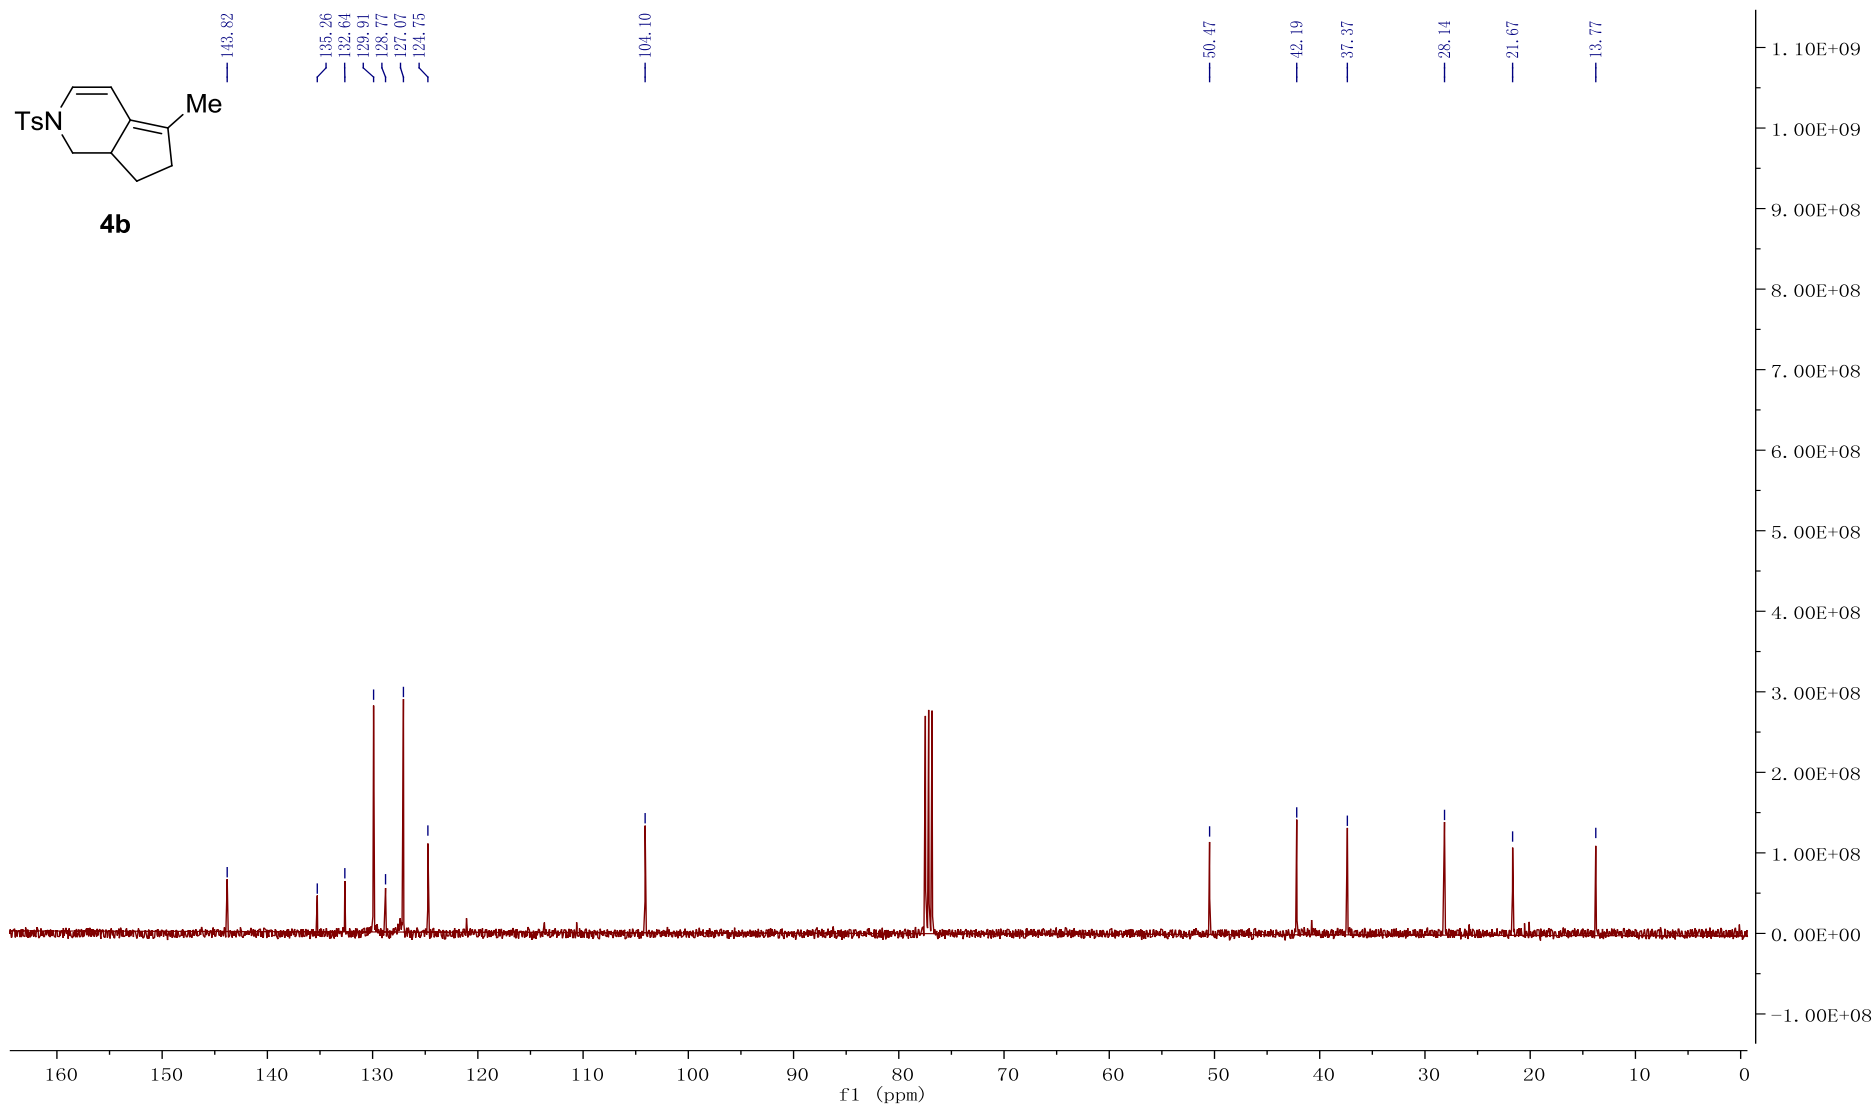

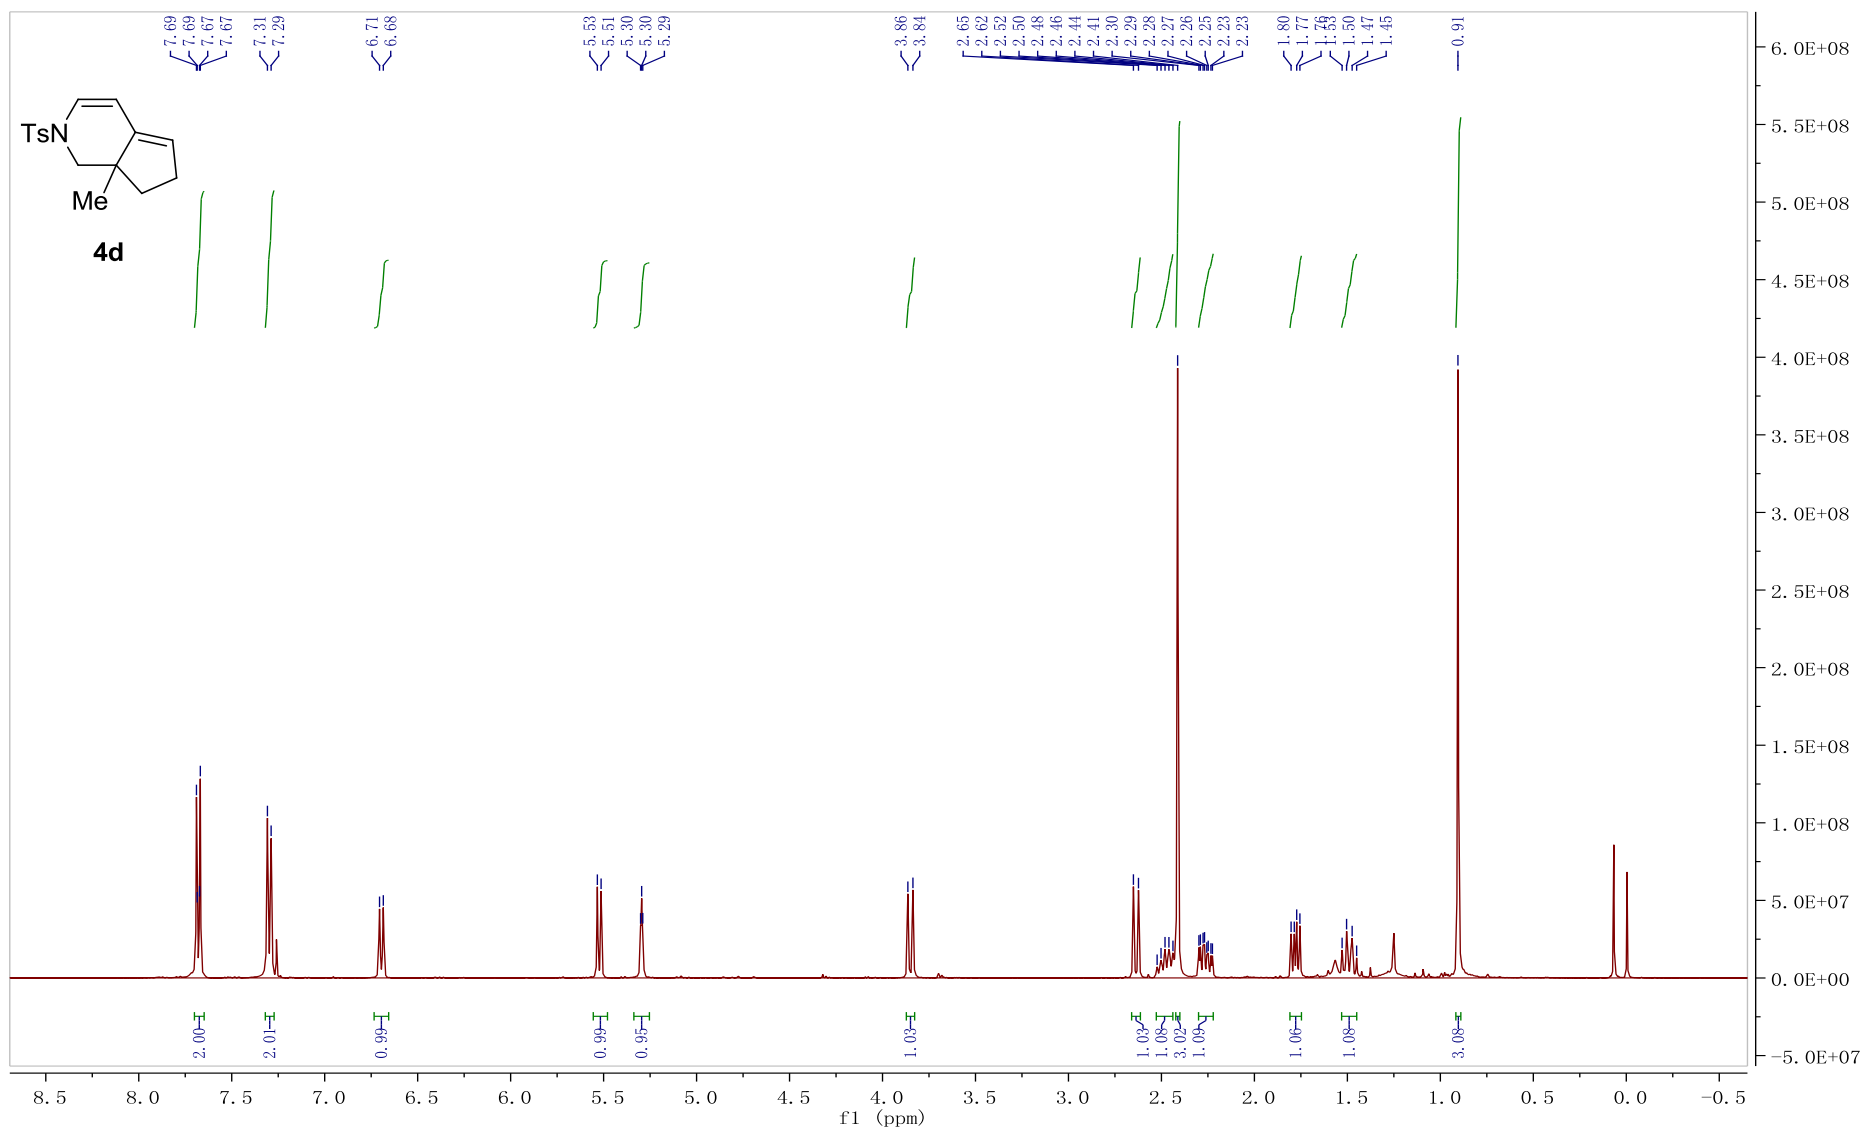

S139

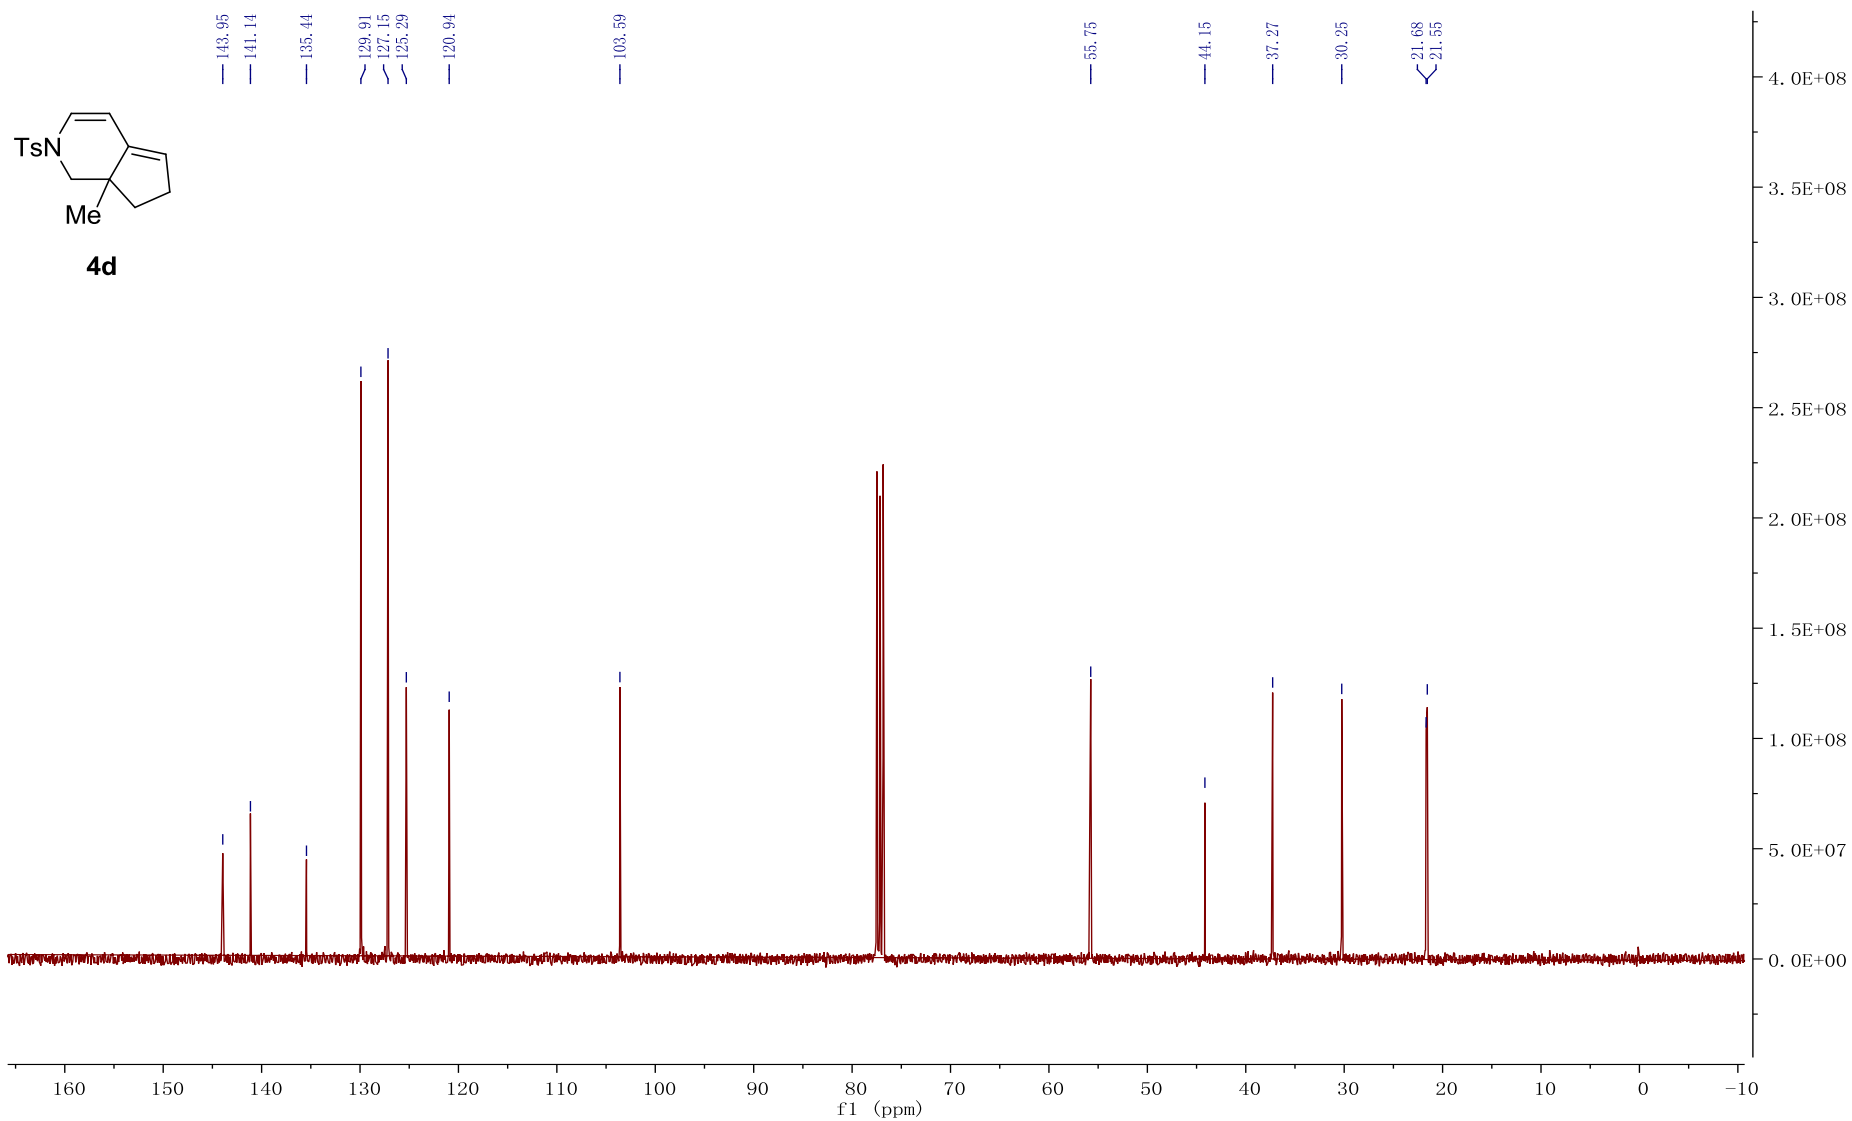

S140

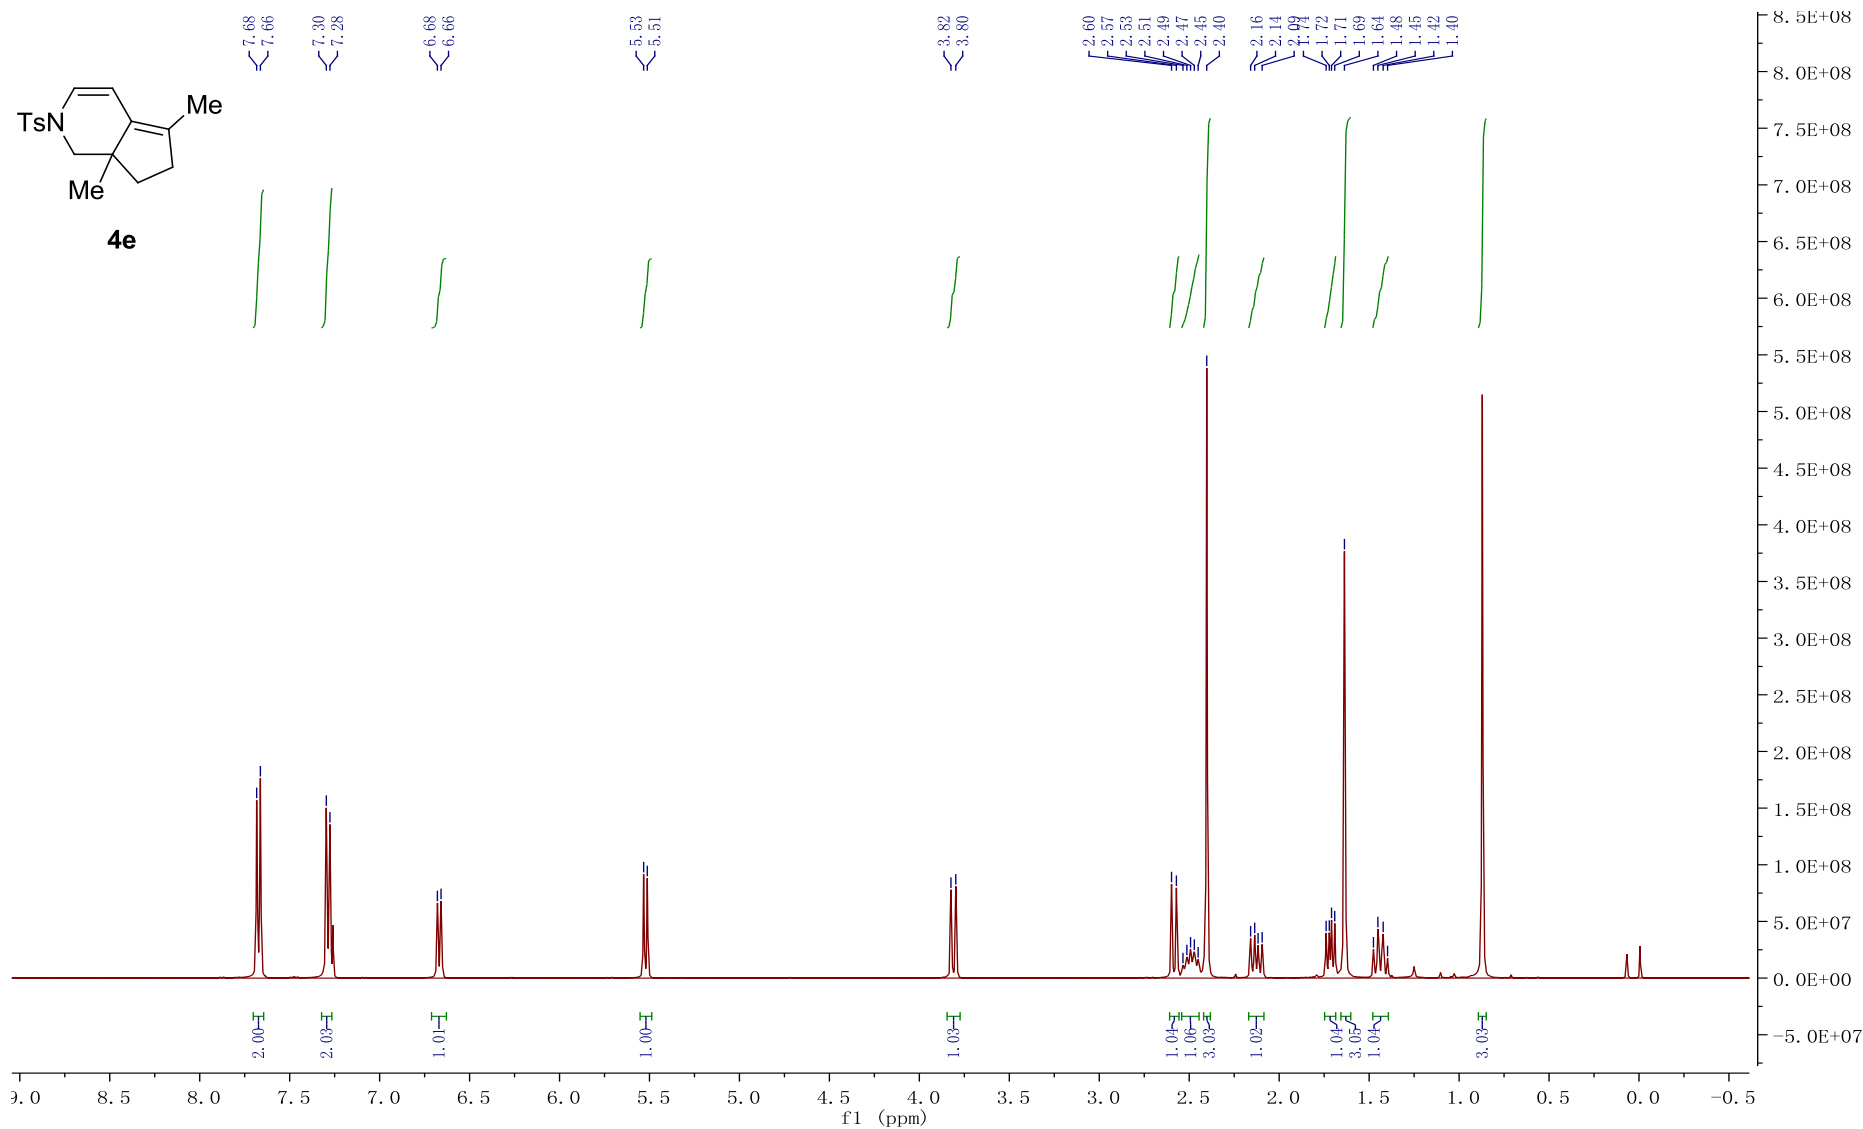

S141

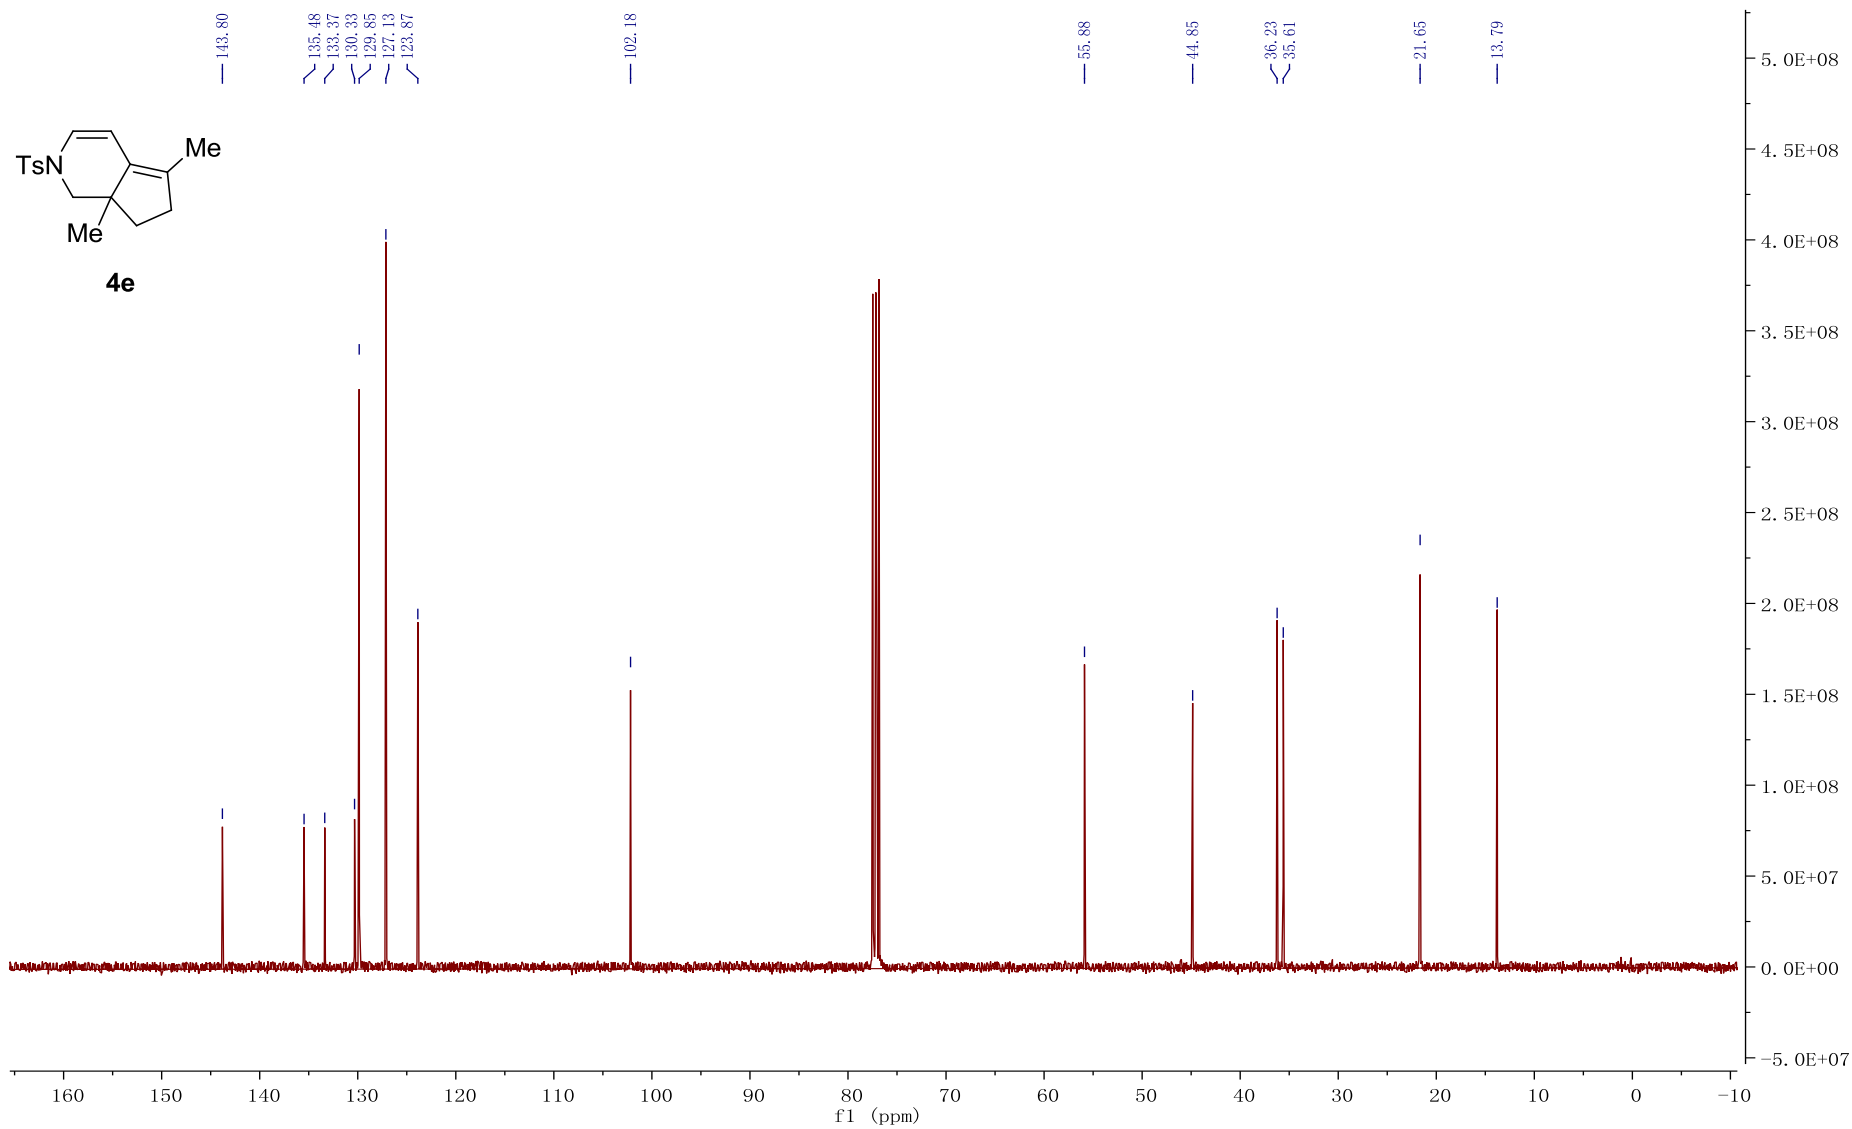

S142

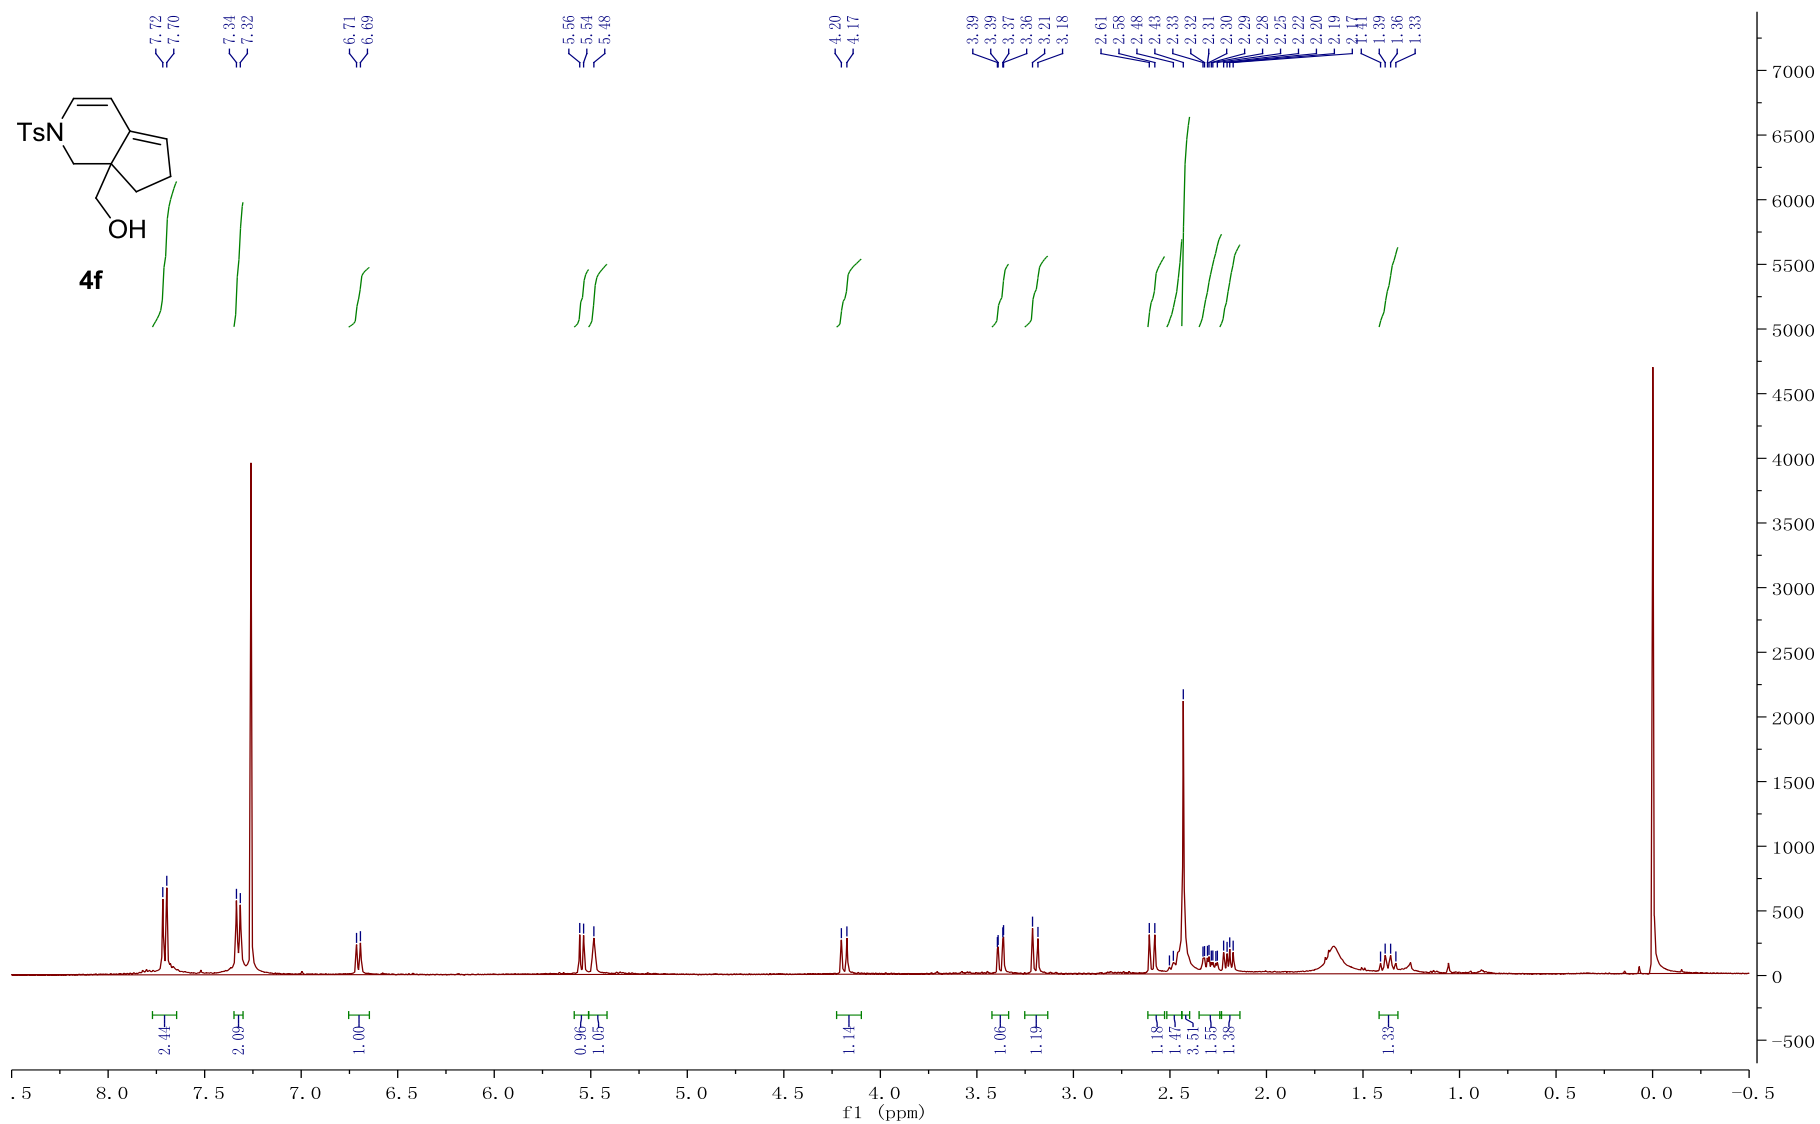

S143

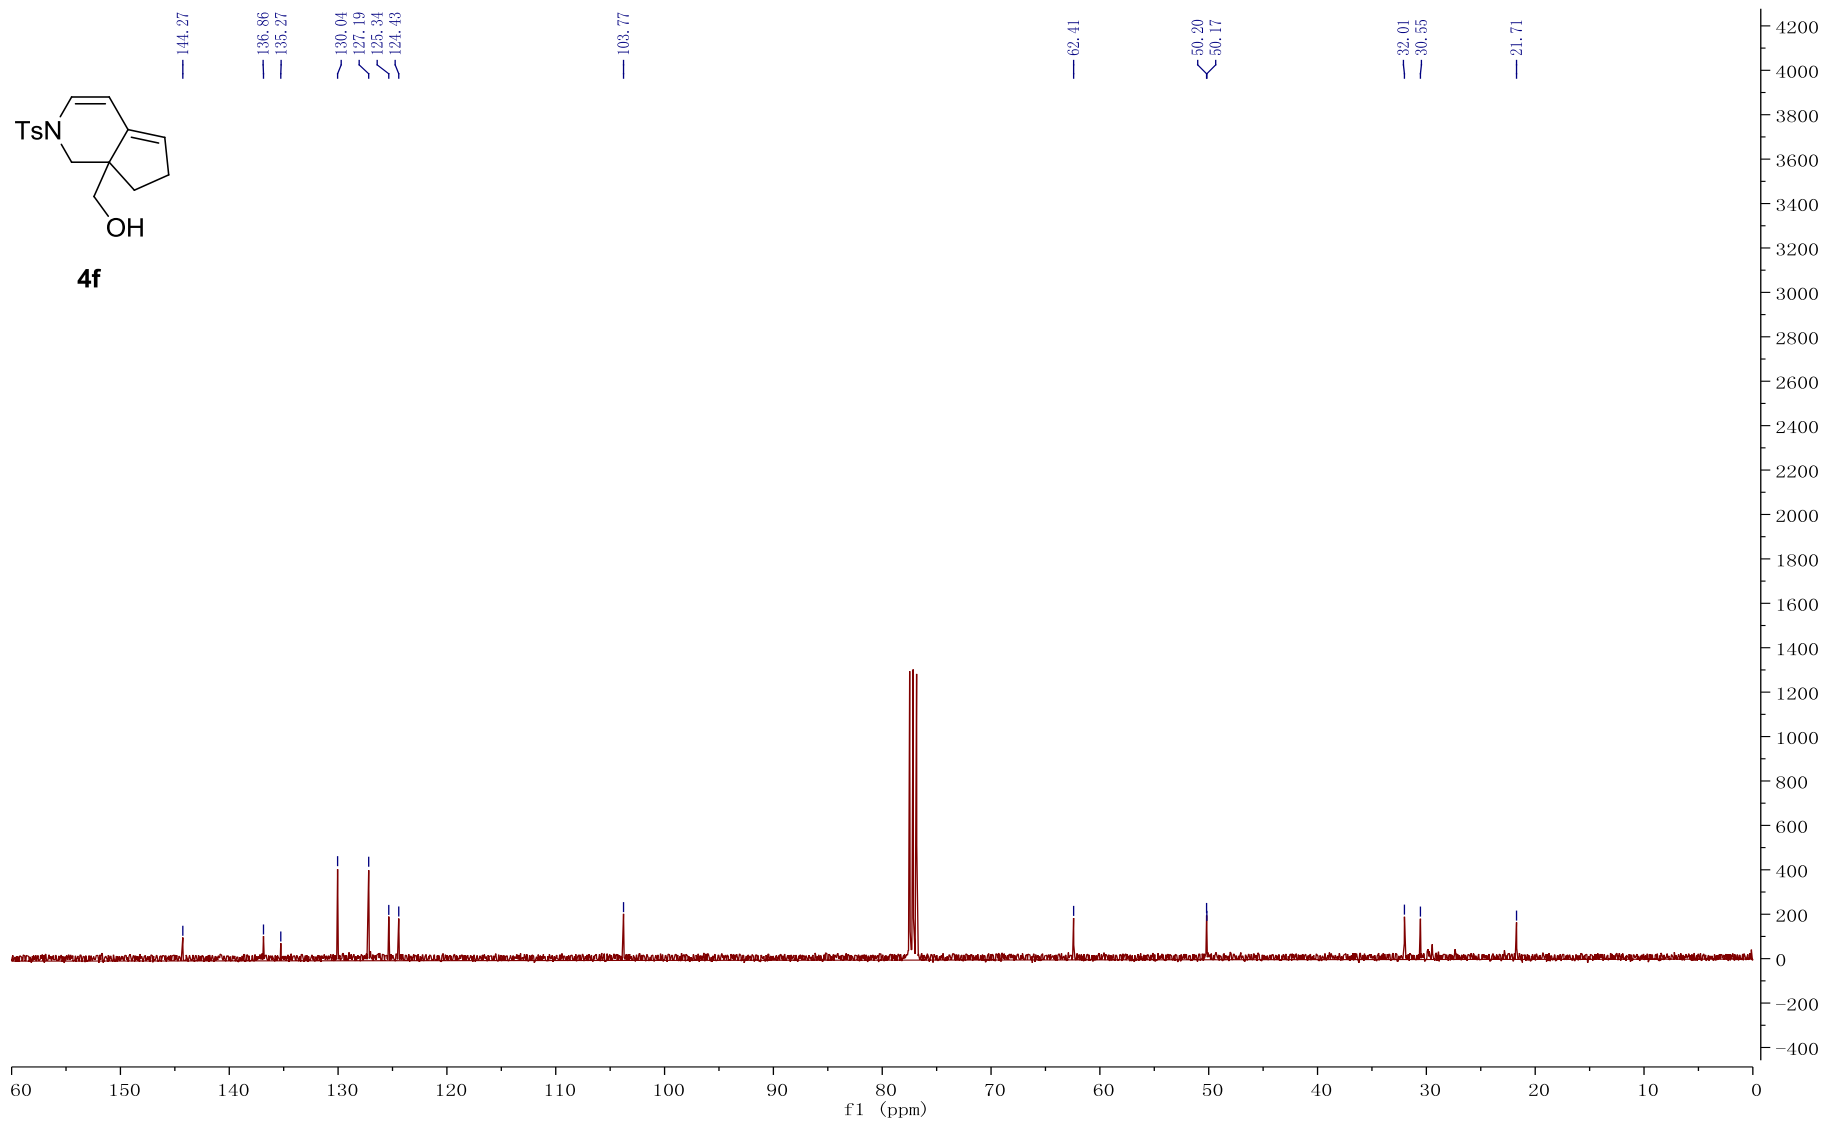

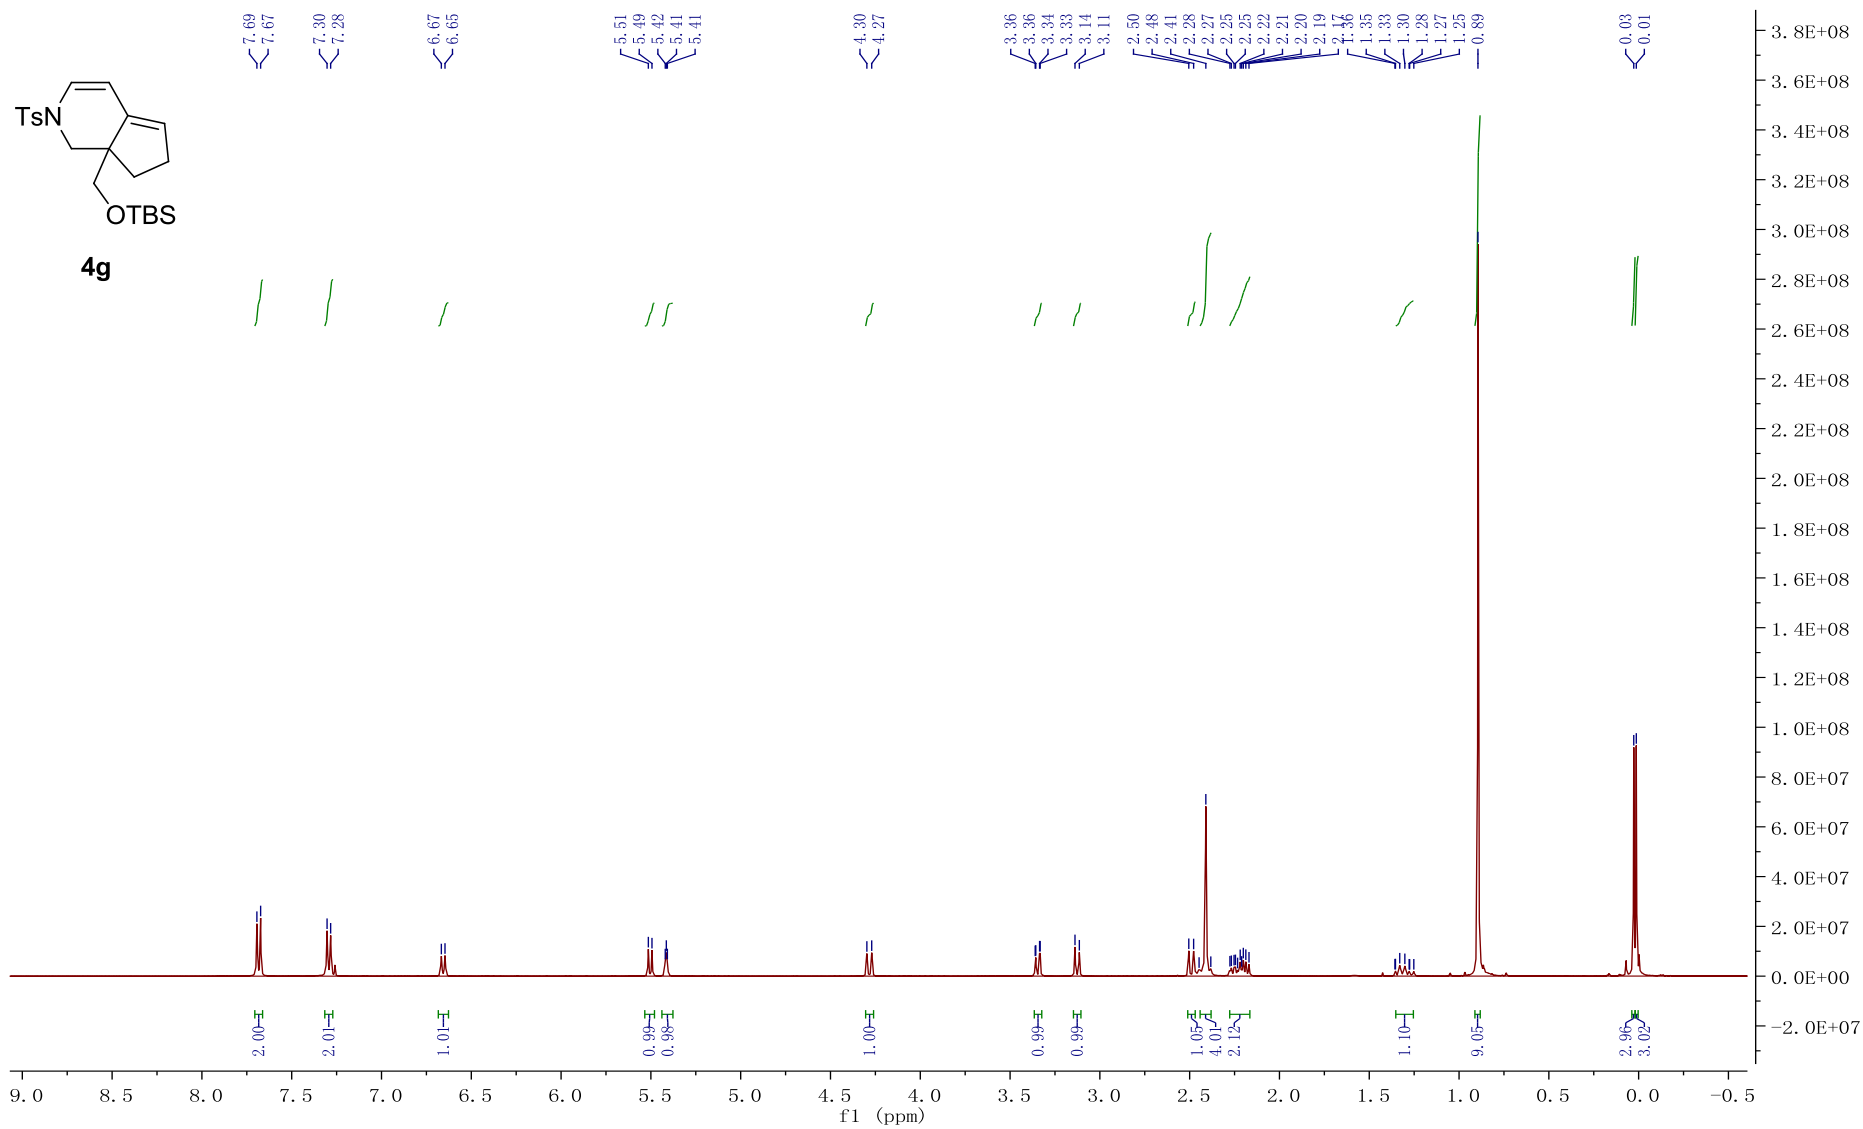

S145

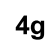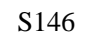

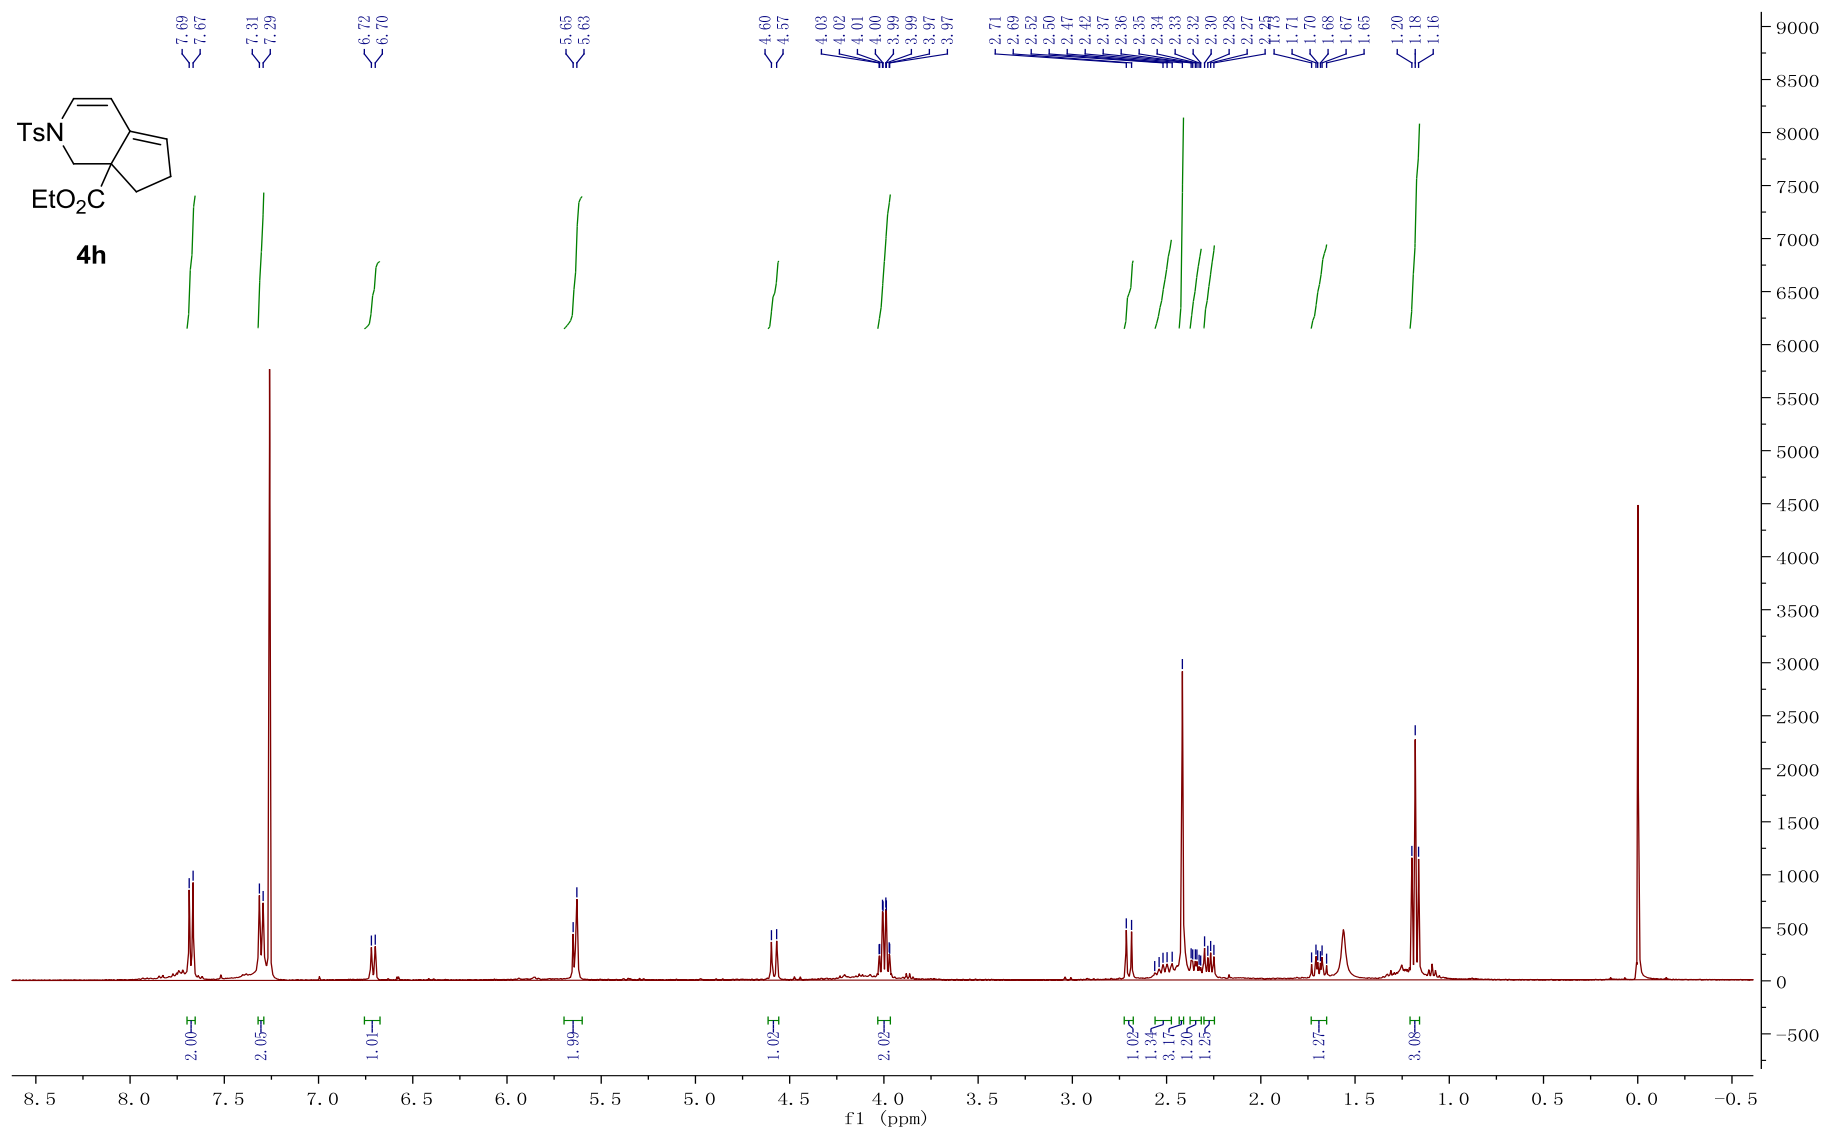

S147

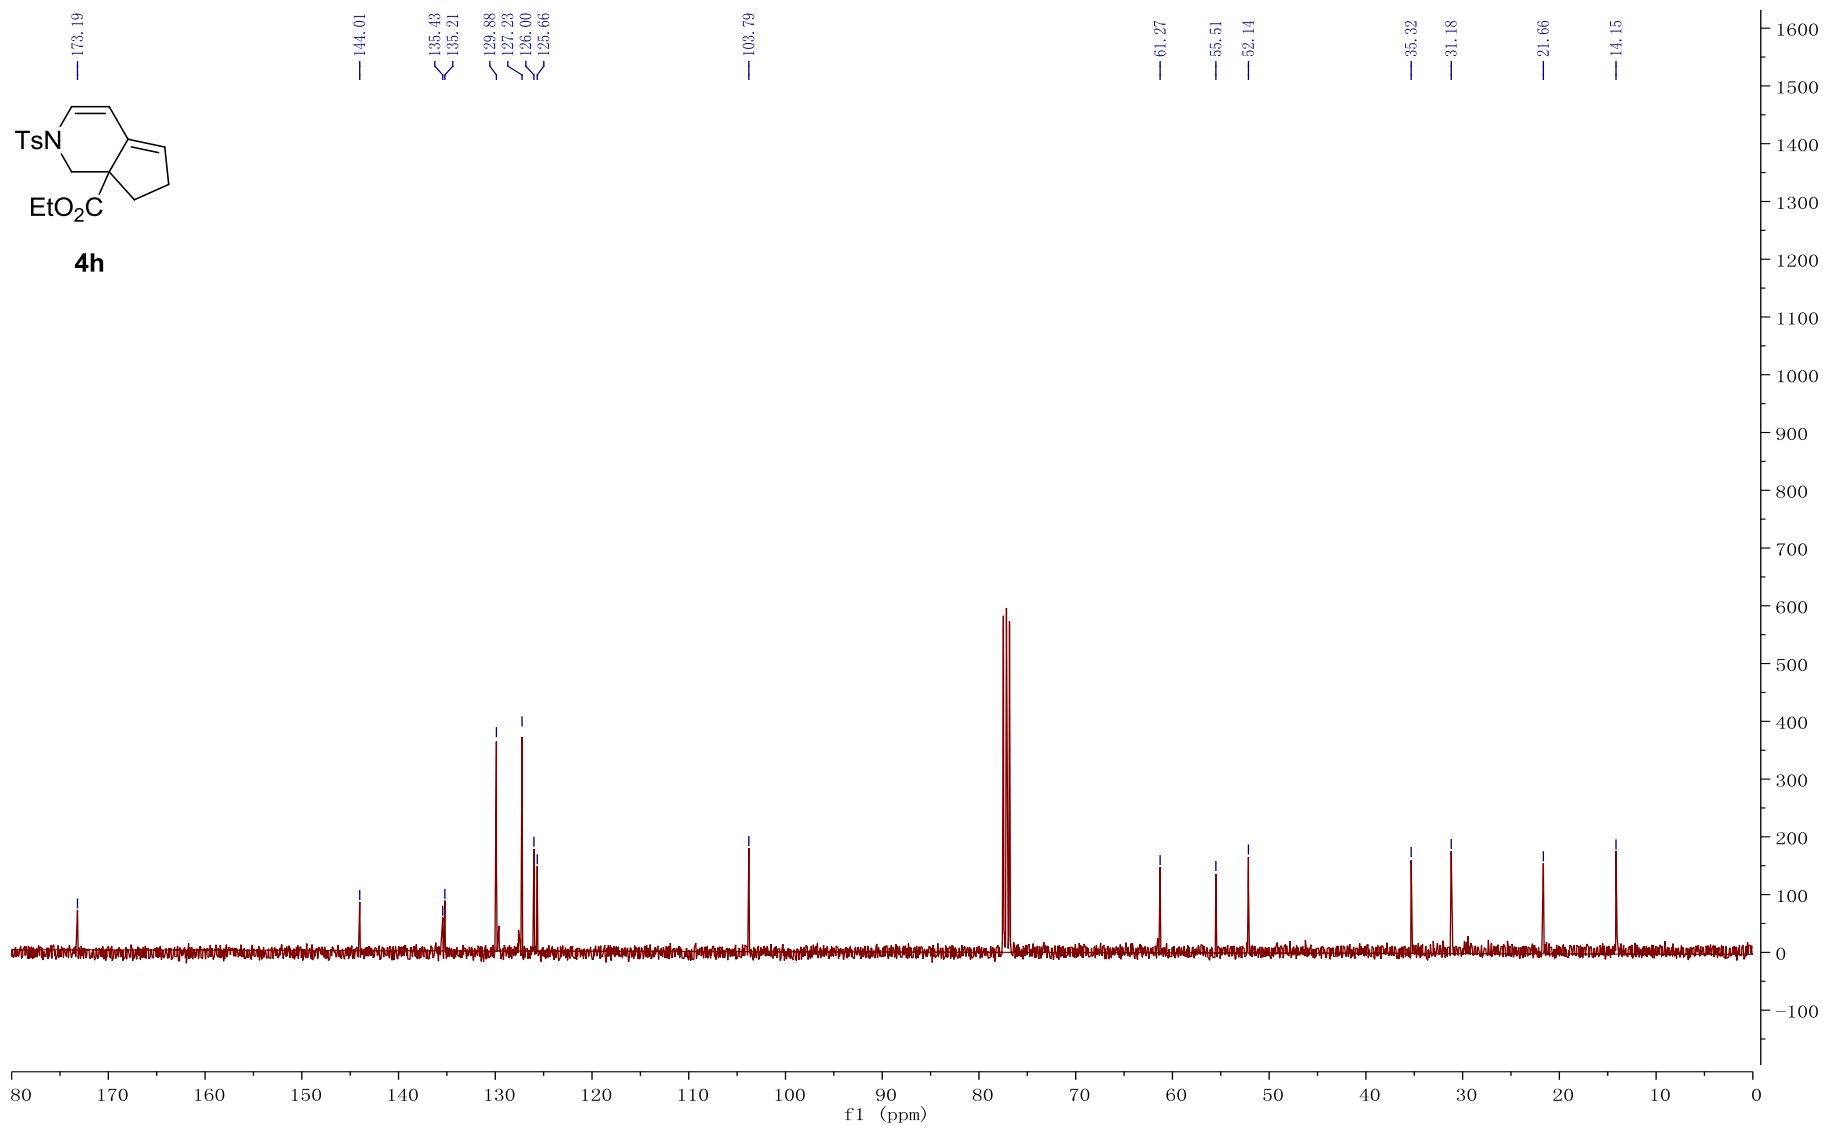

S148

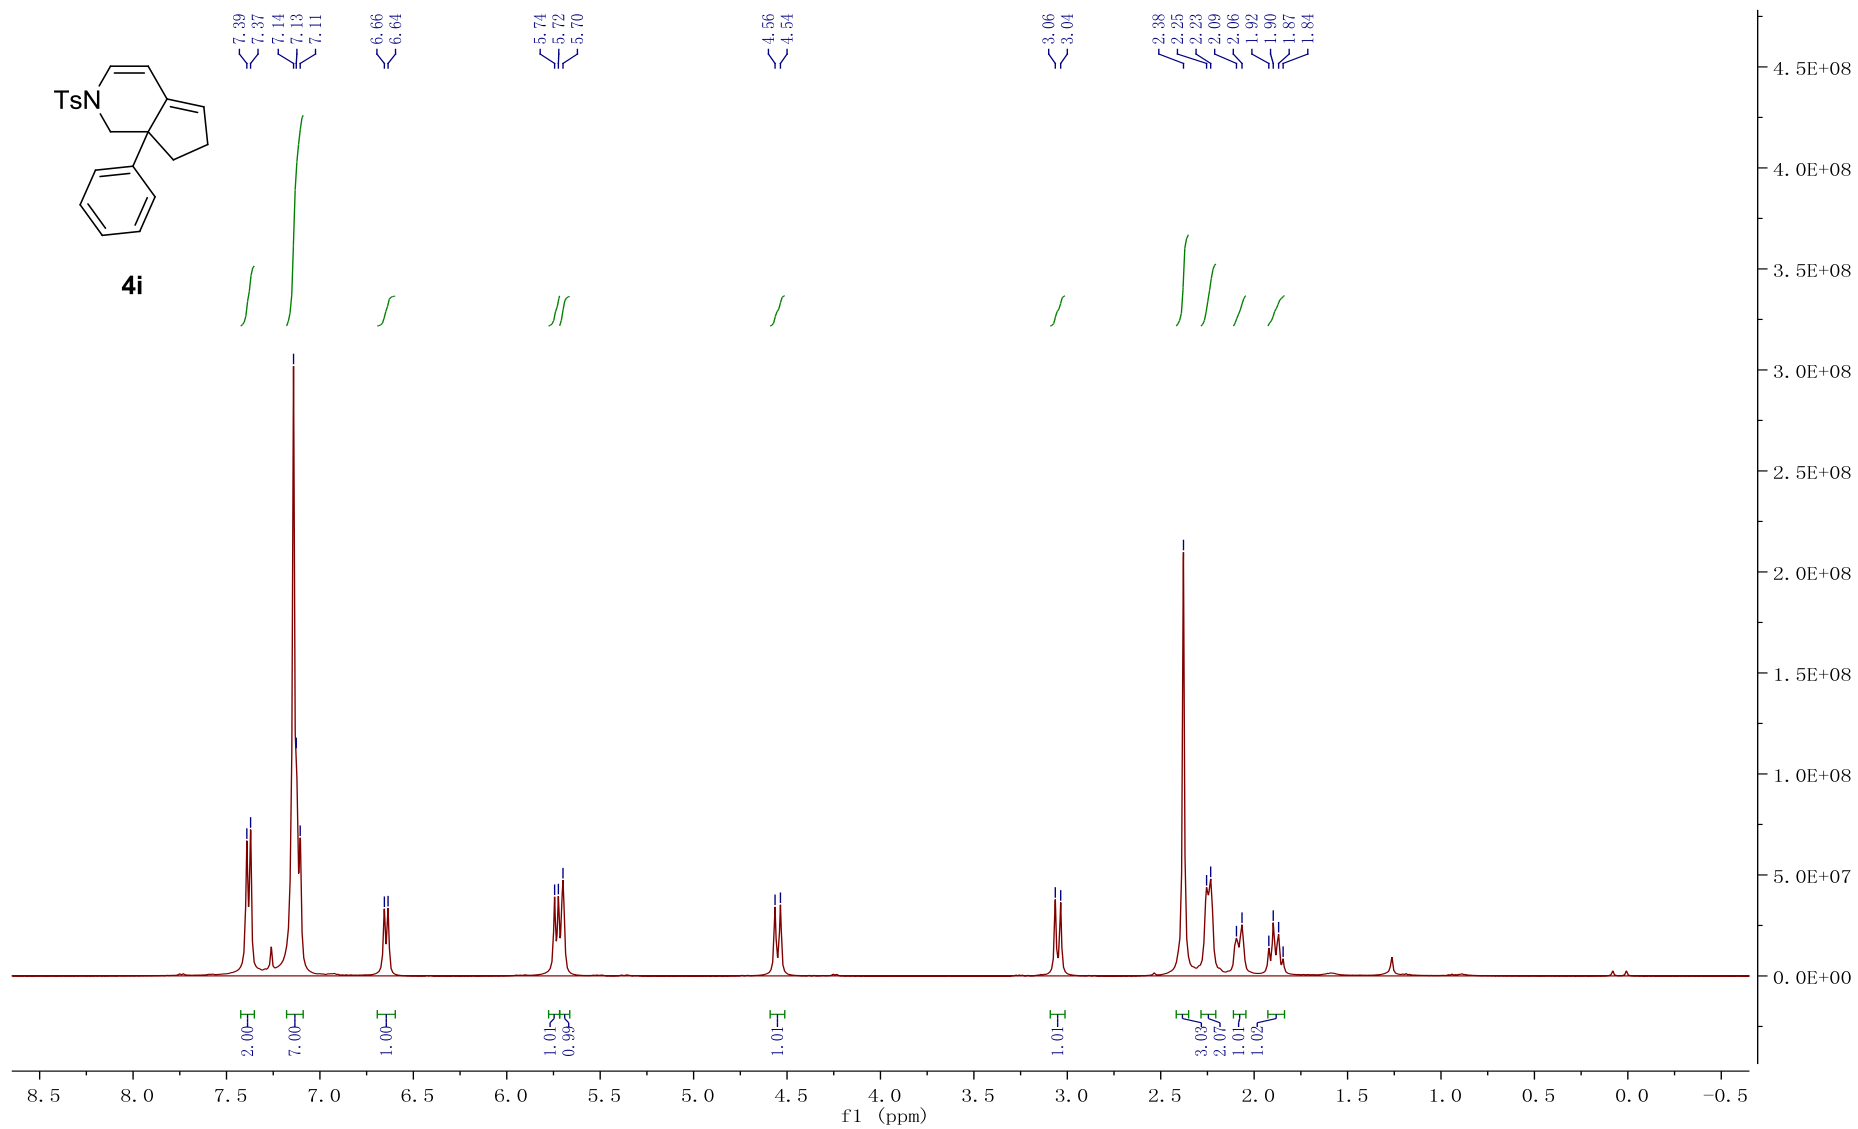

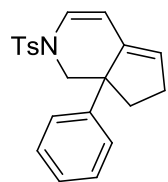

**4i**

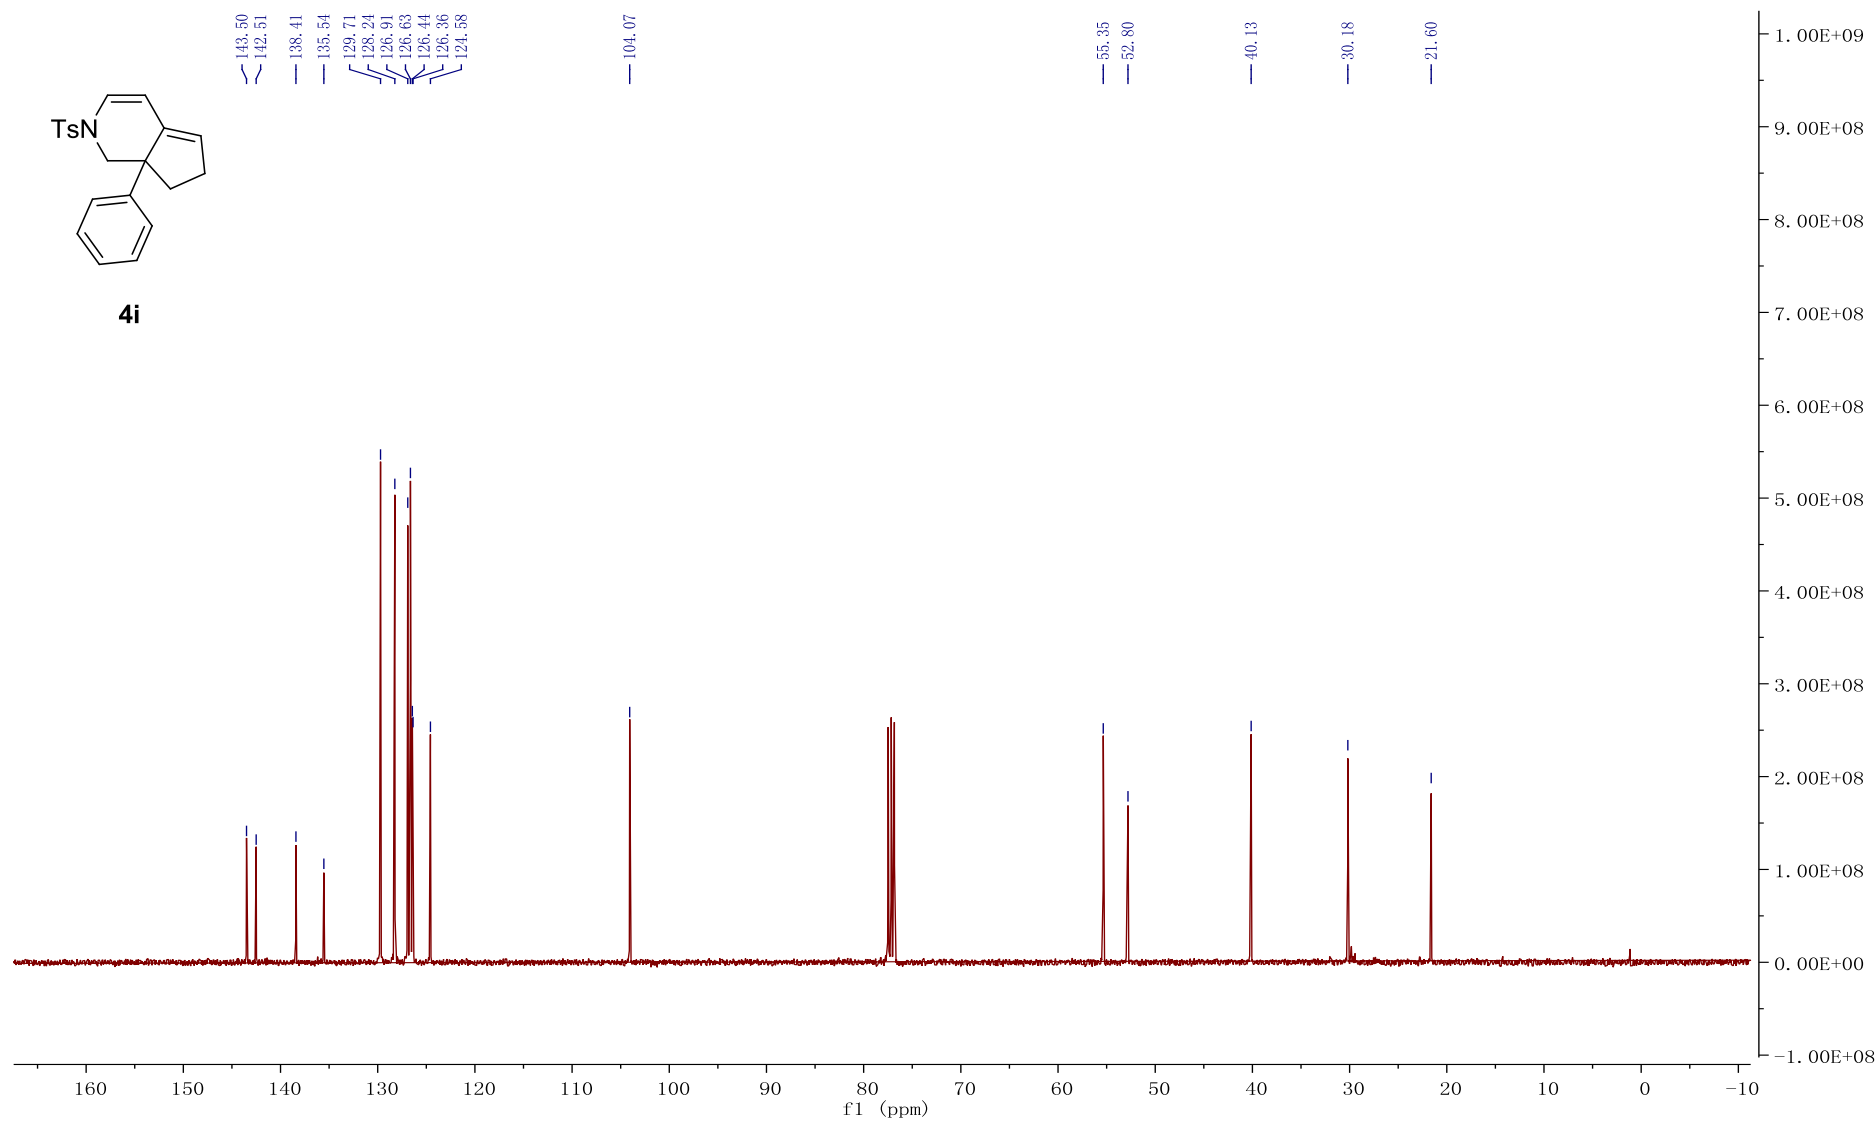

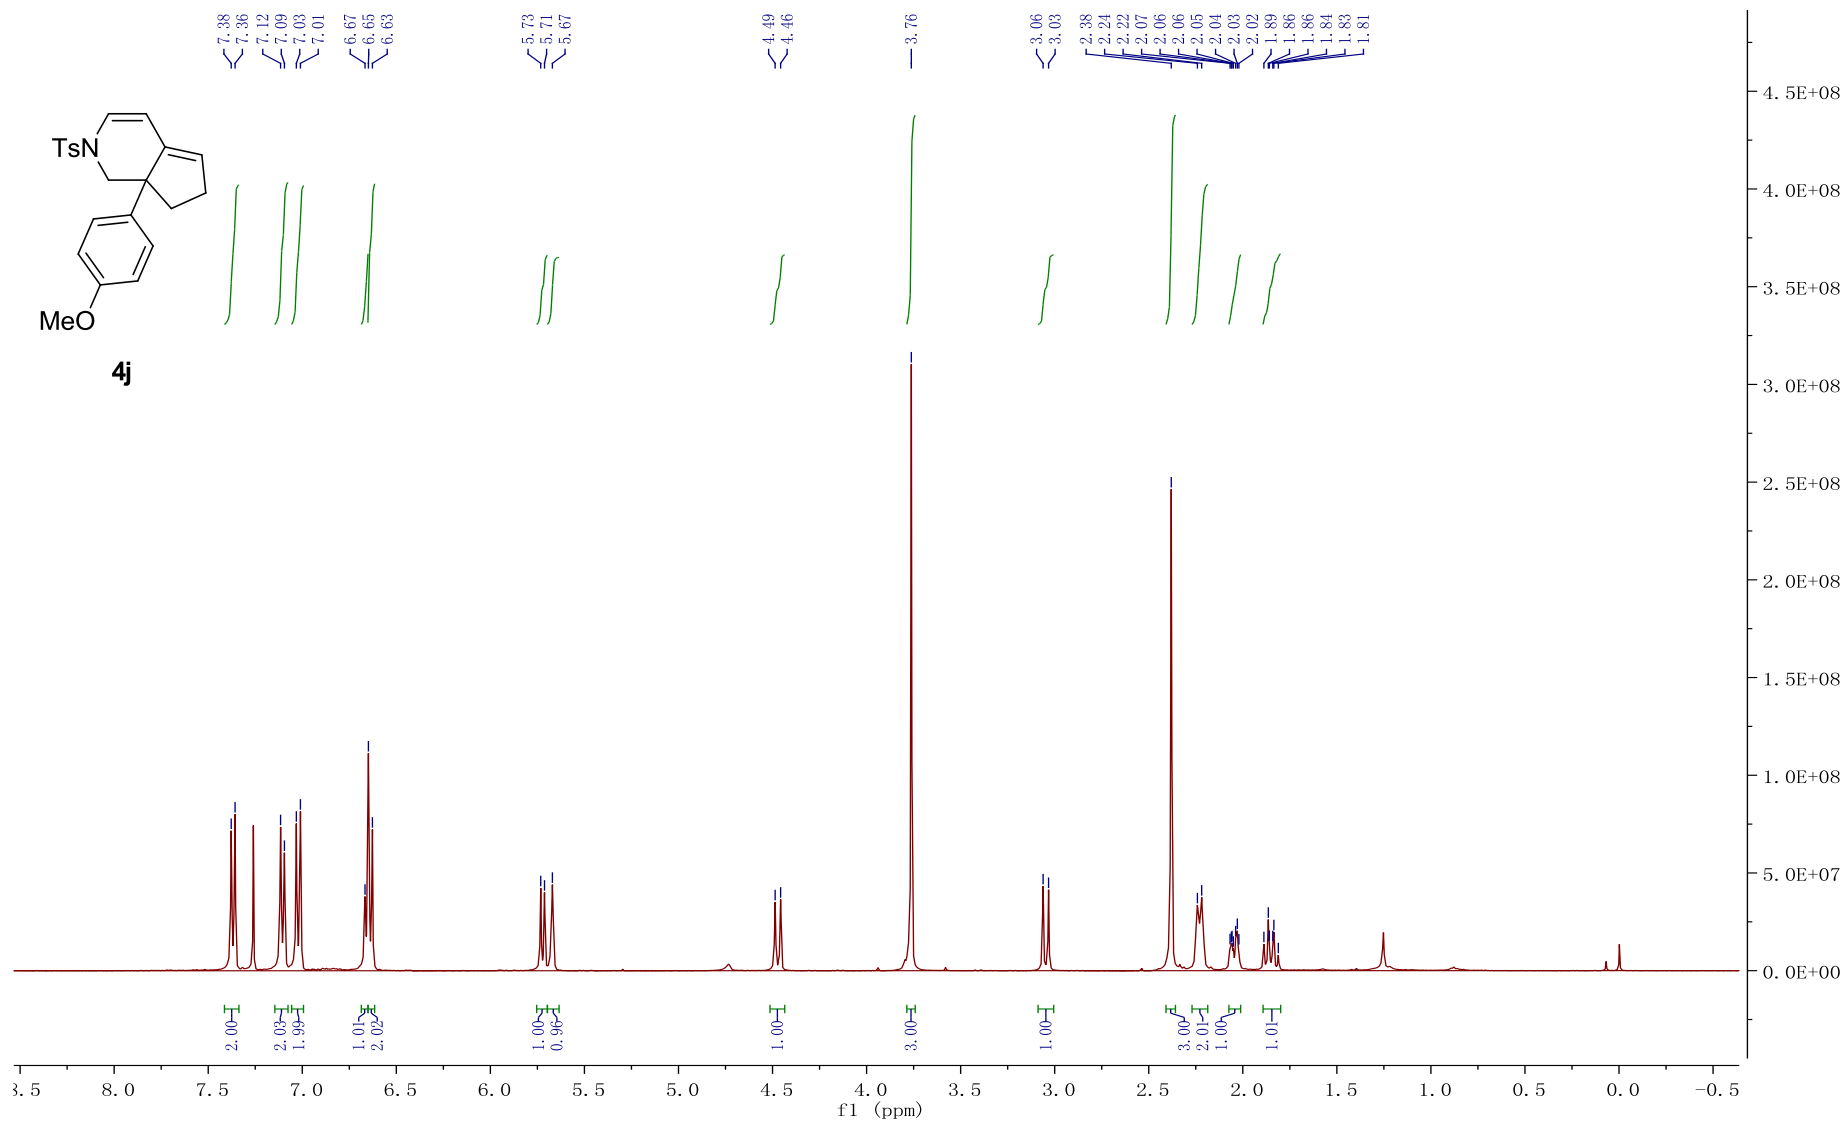

S151

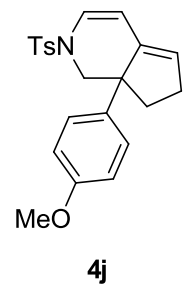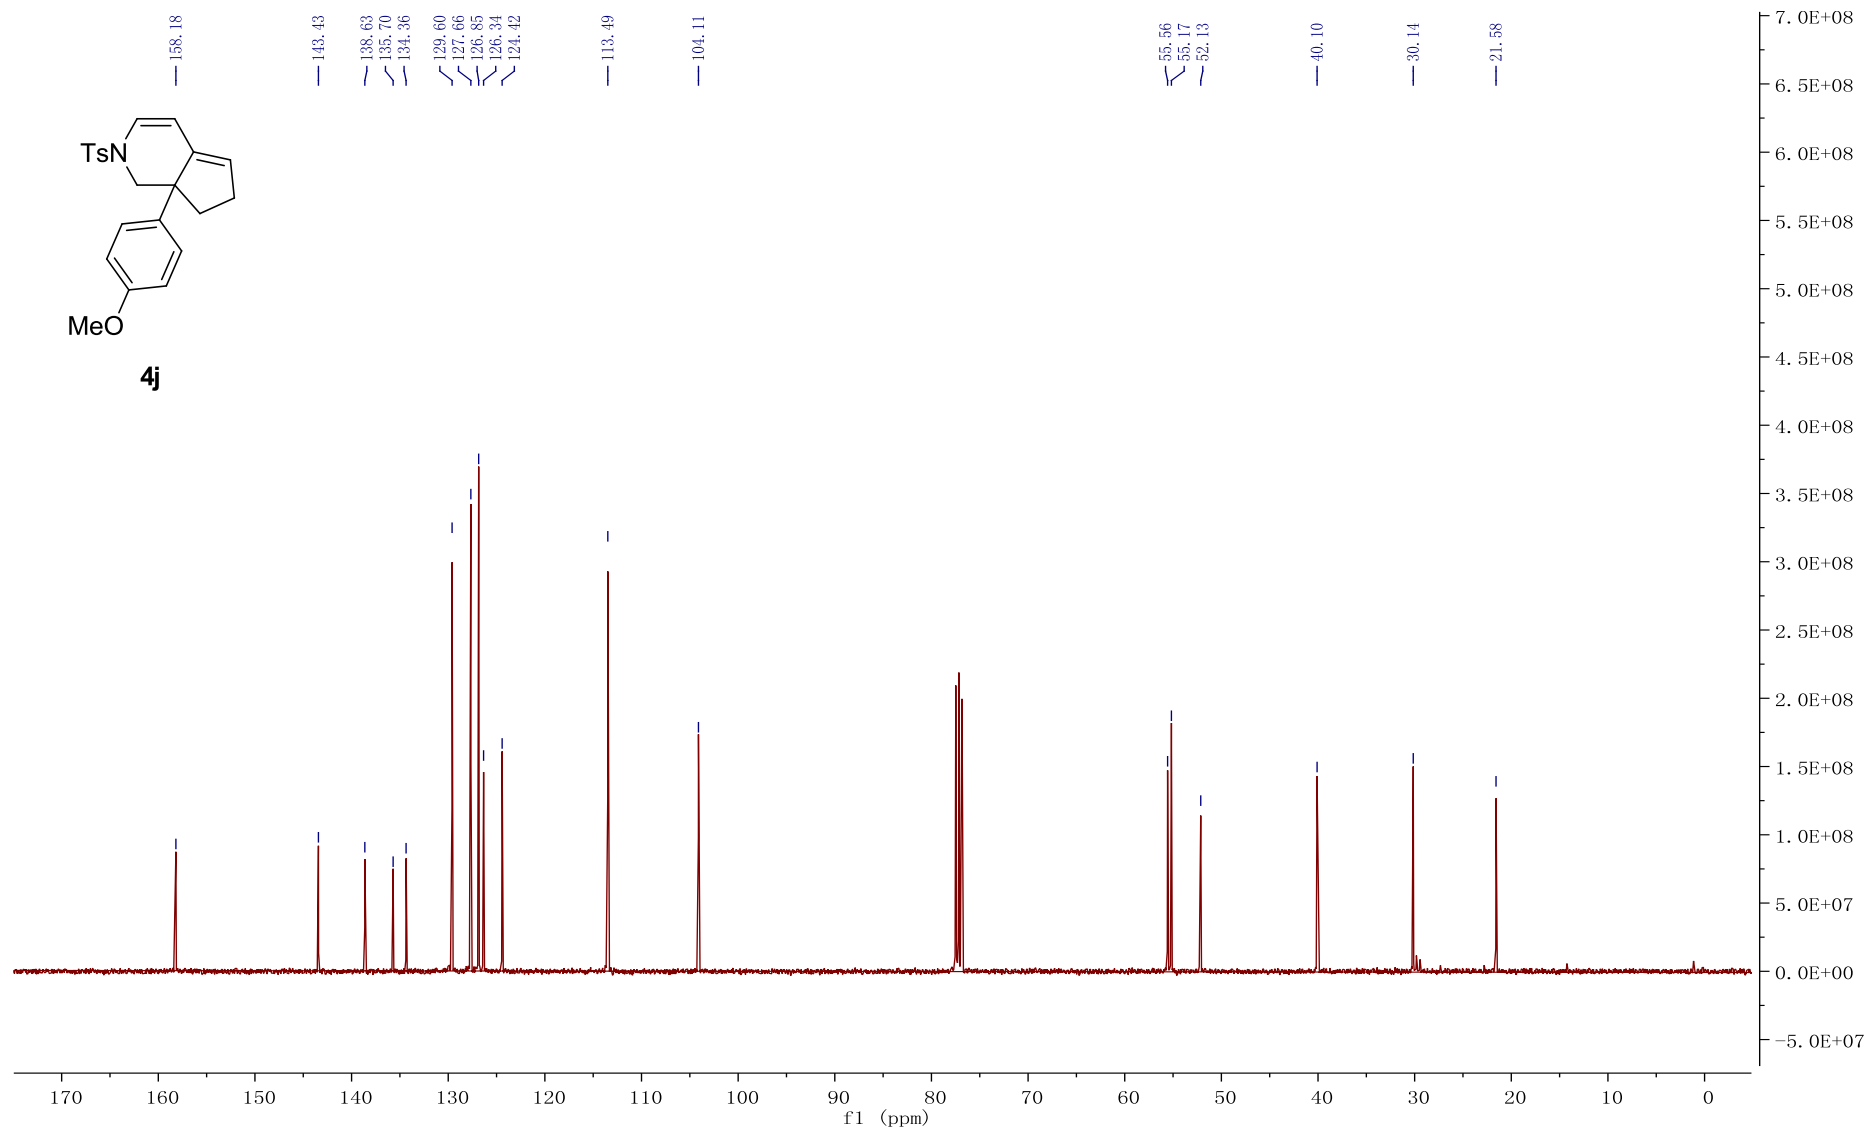

S152

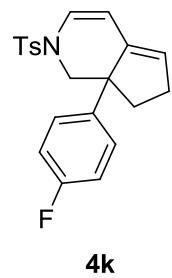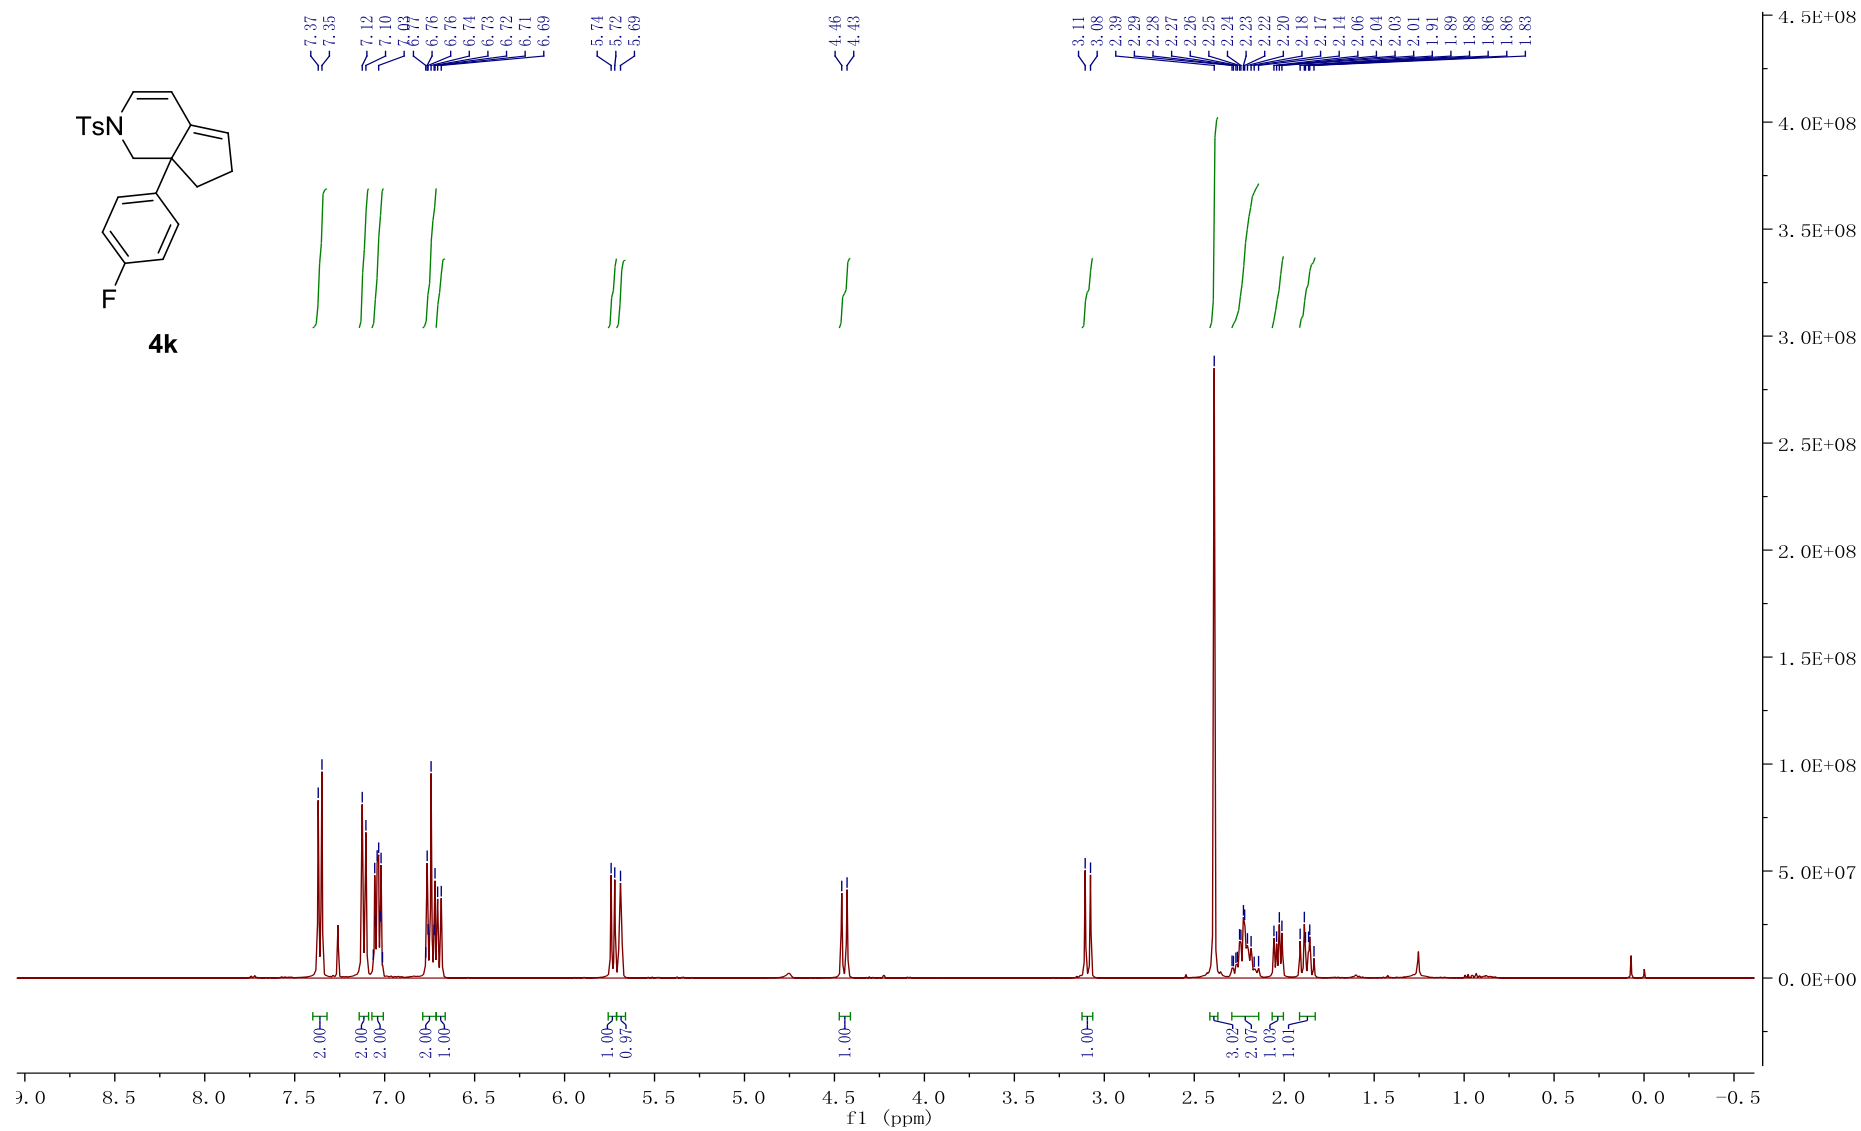

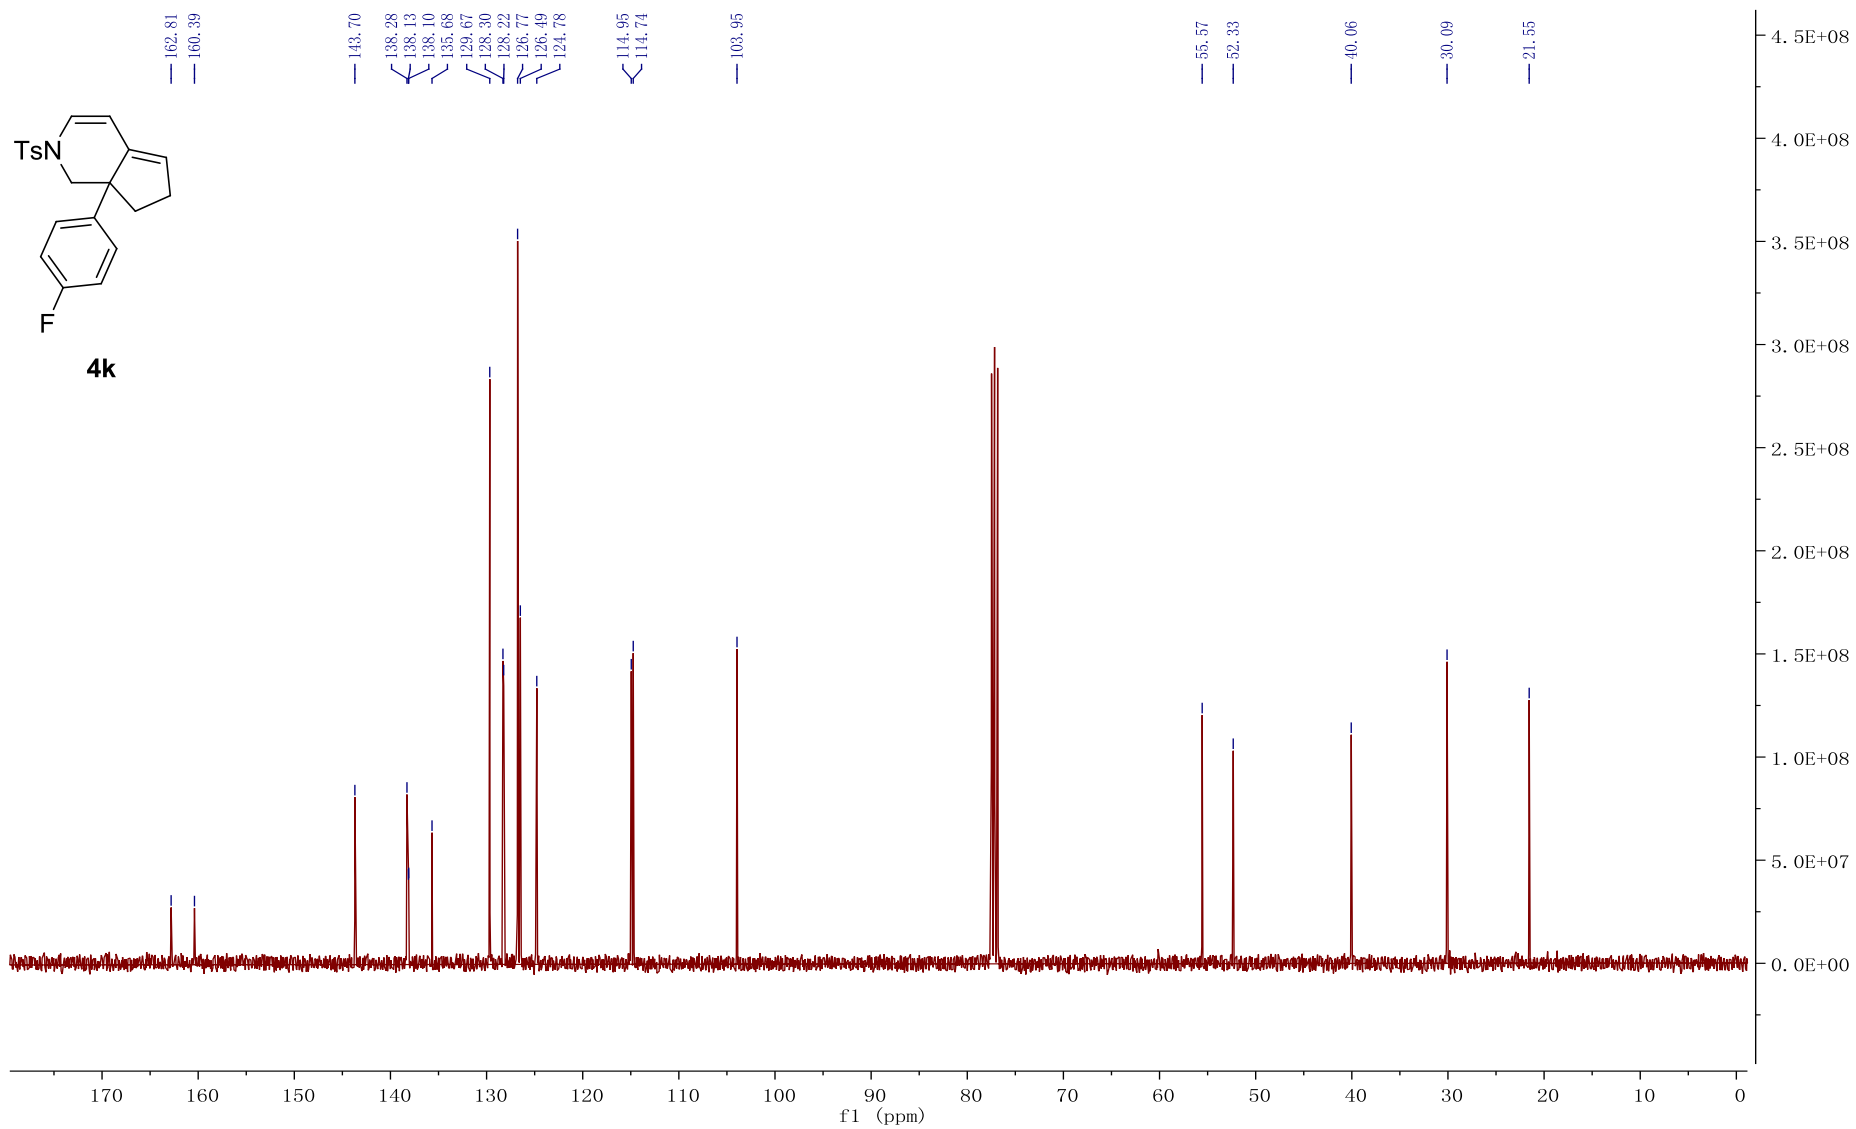

S154

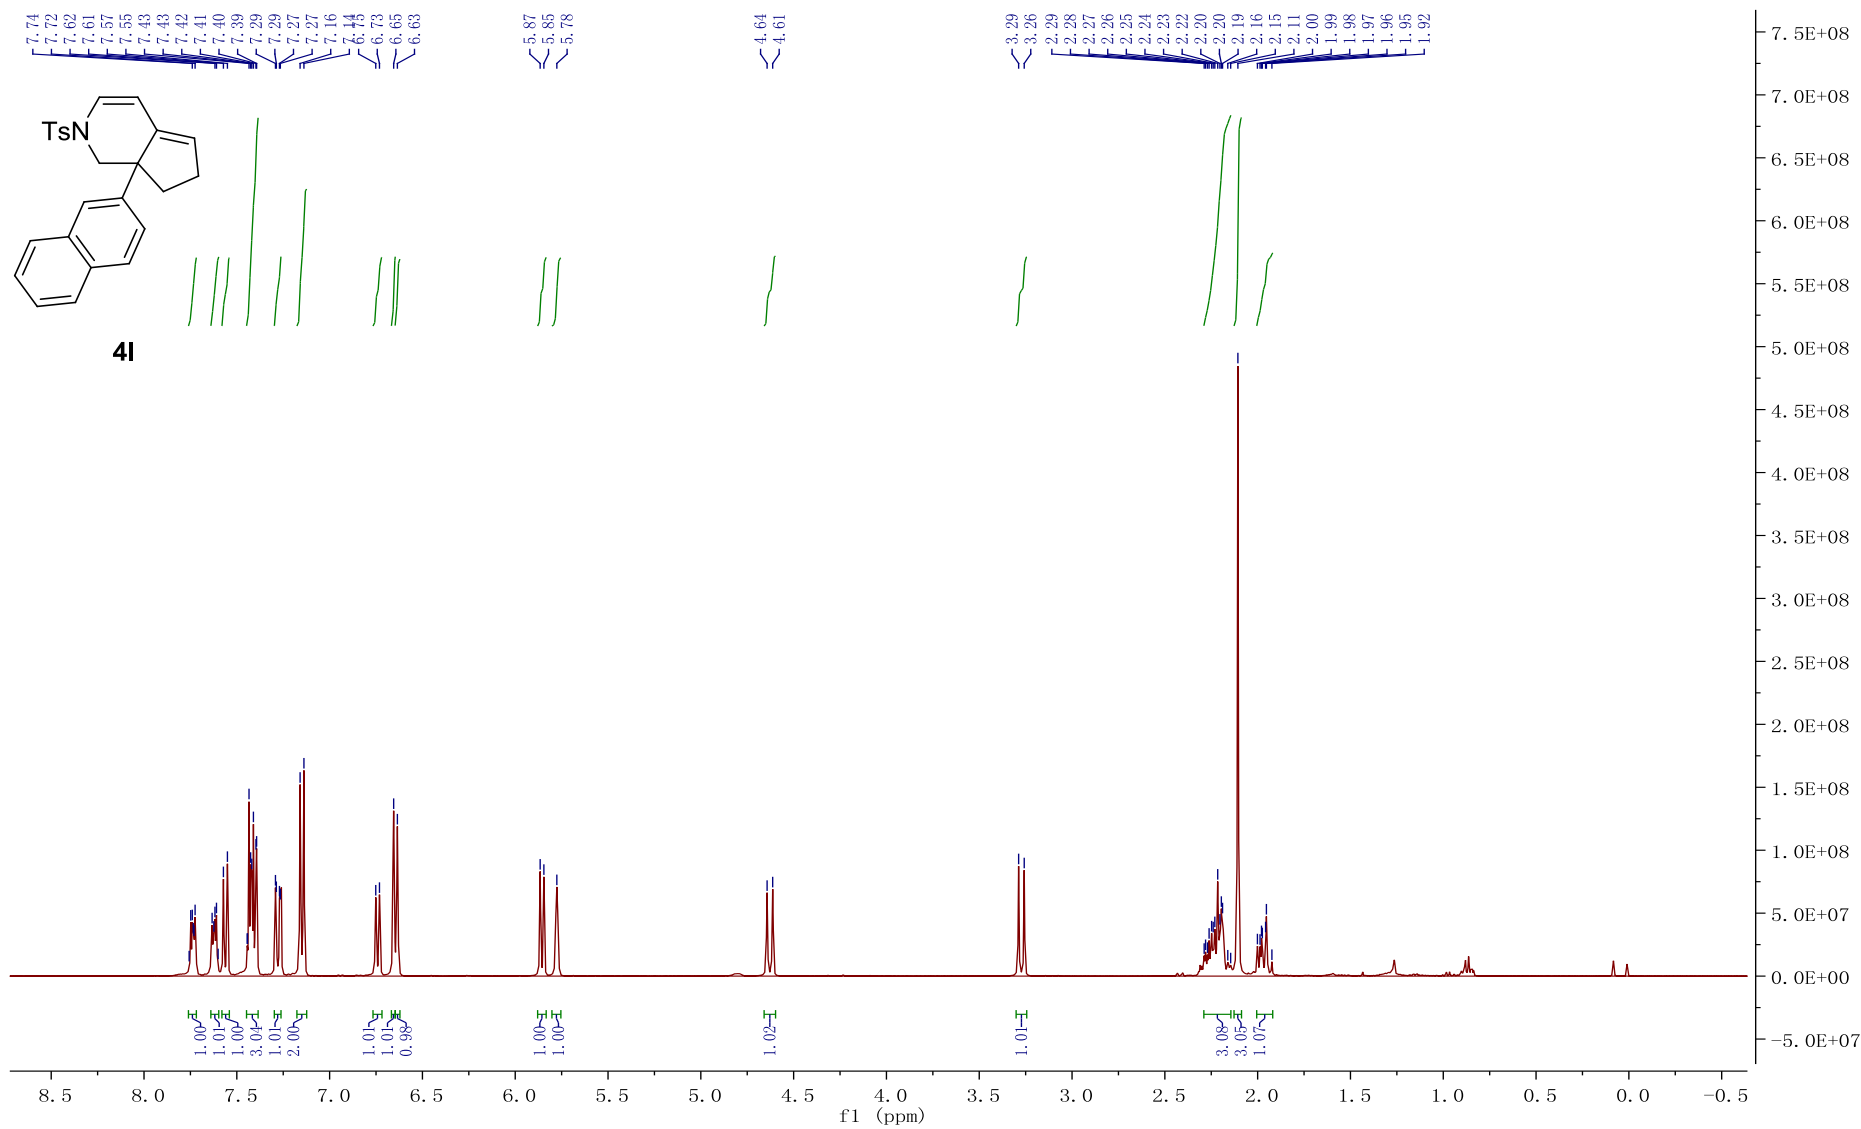

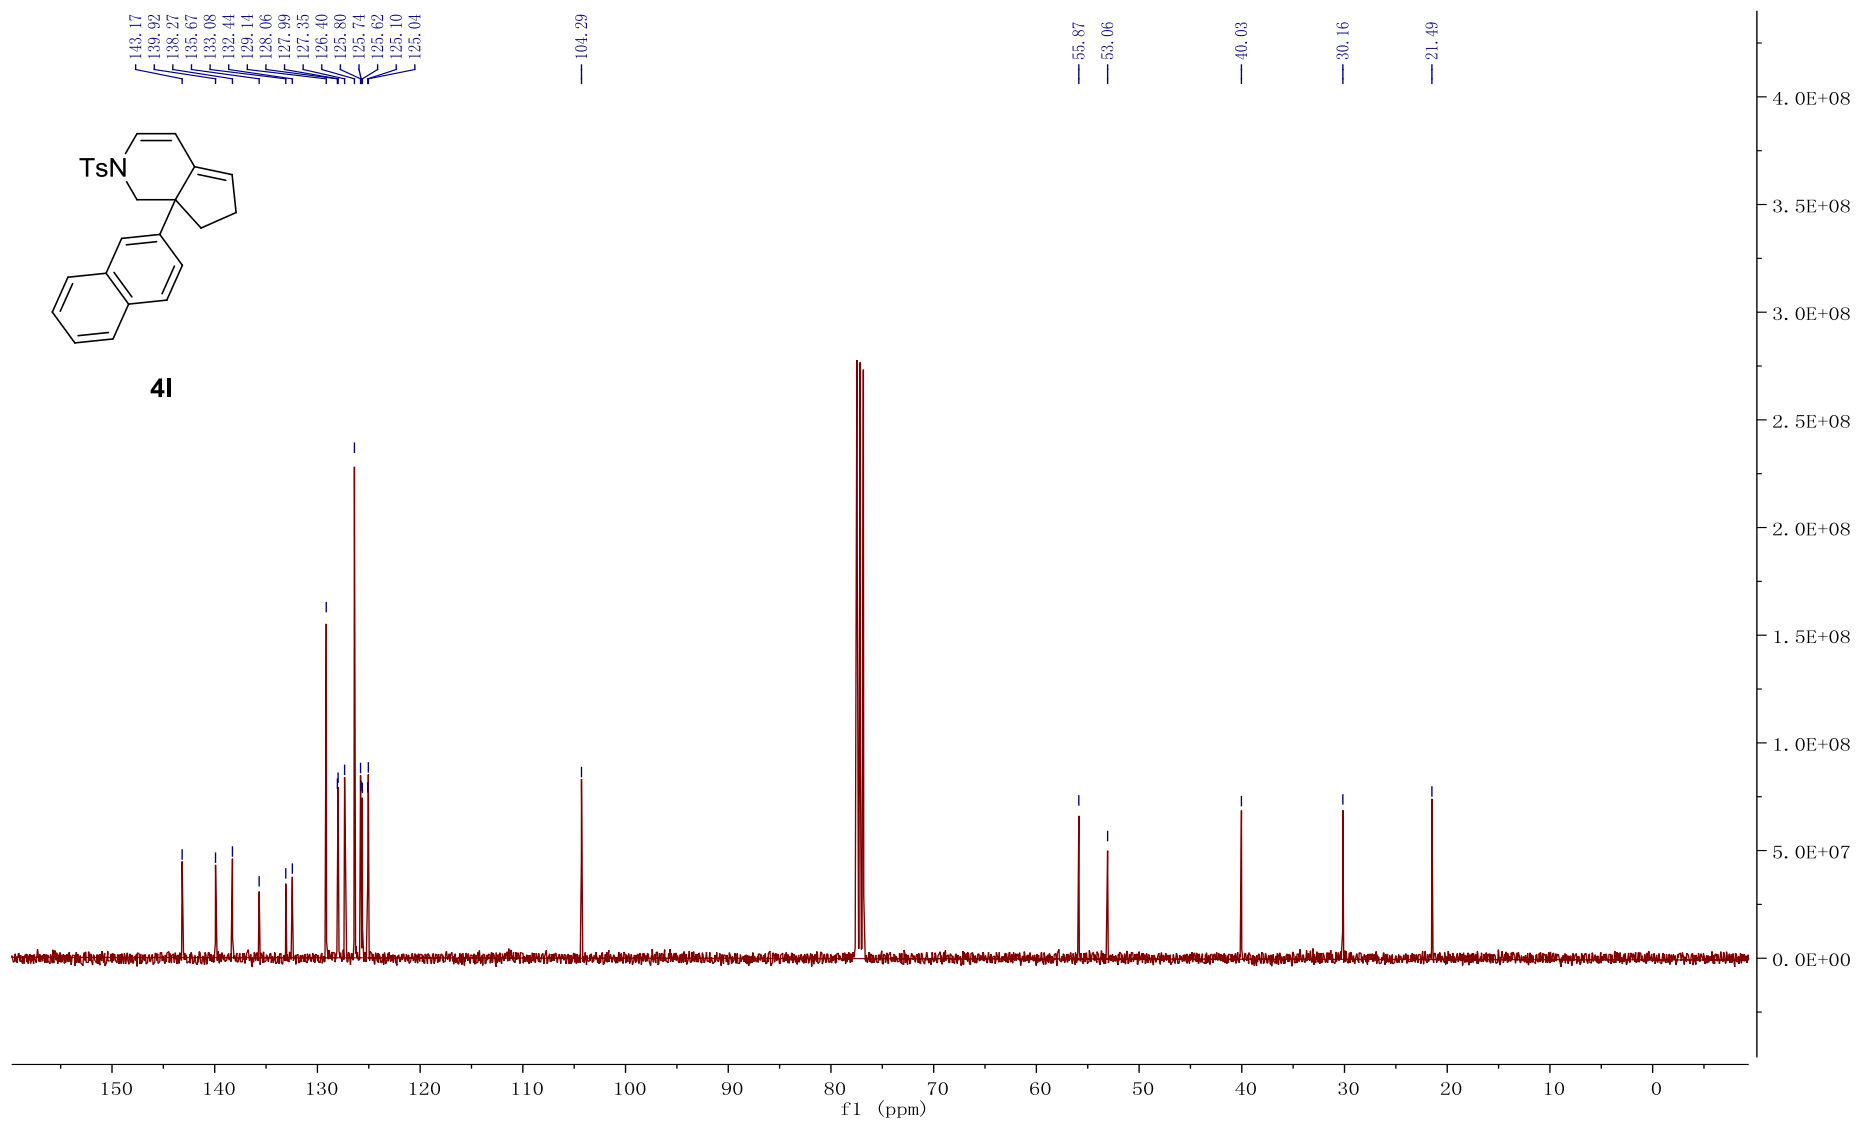

S156

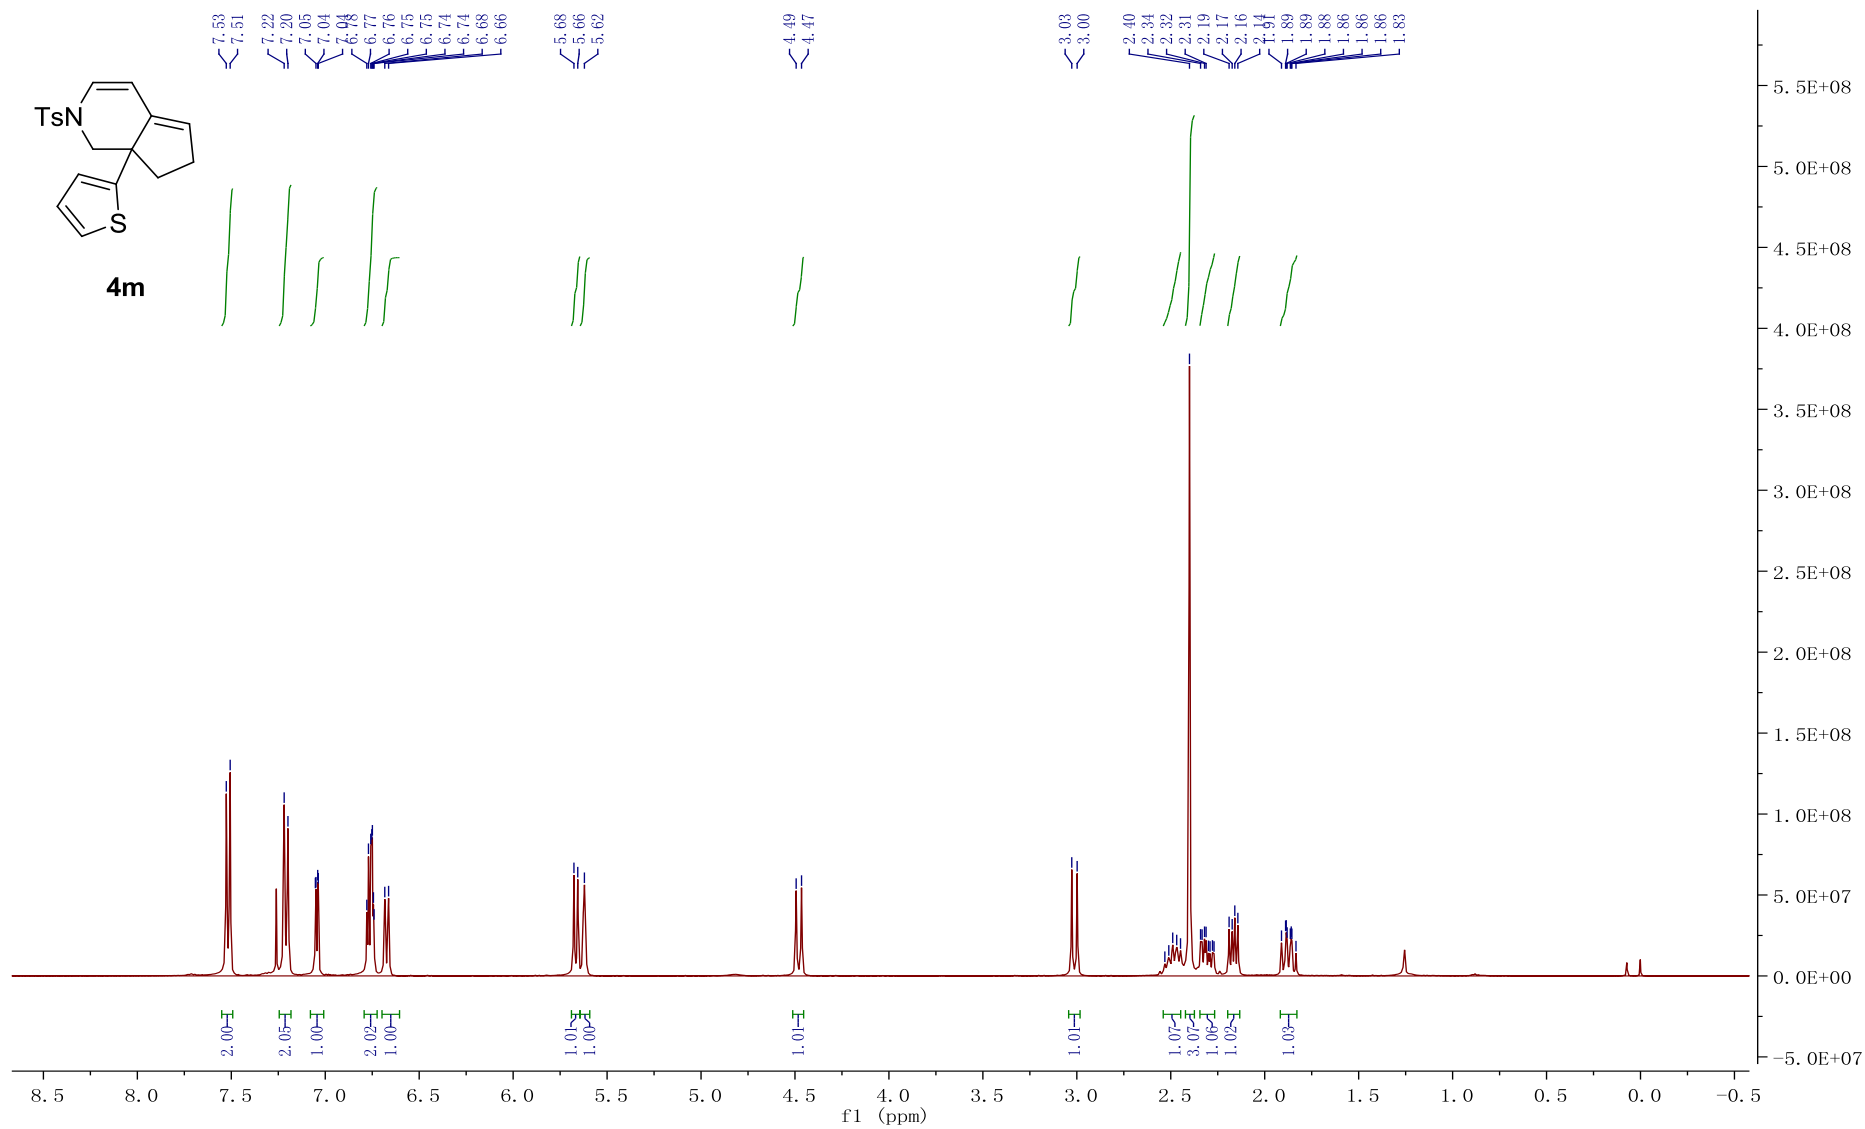

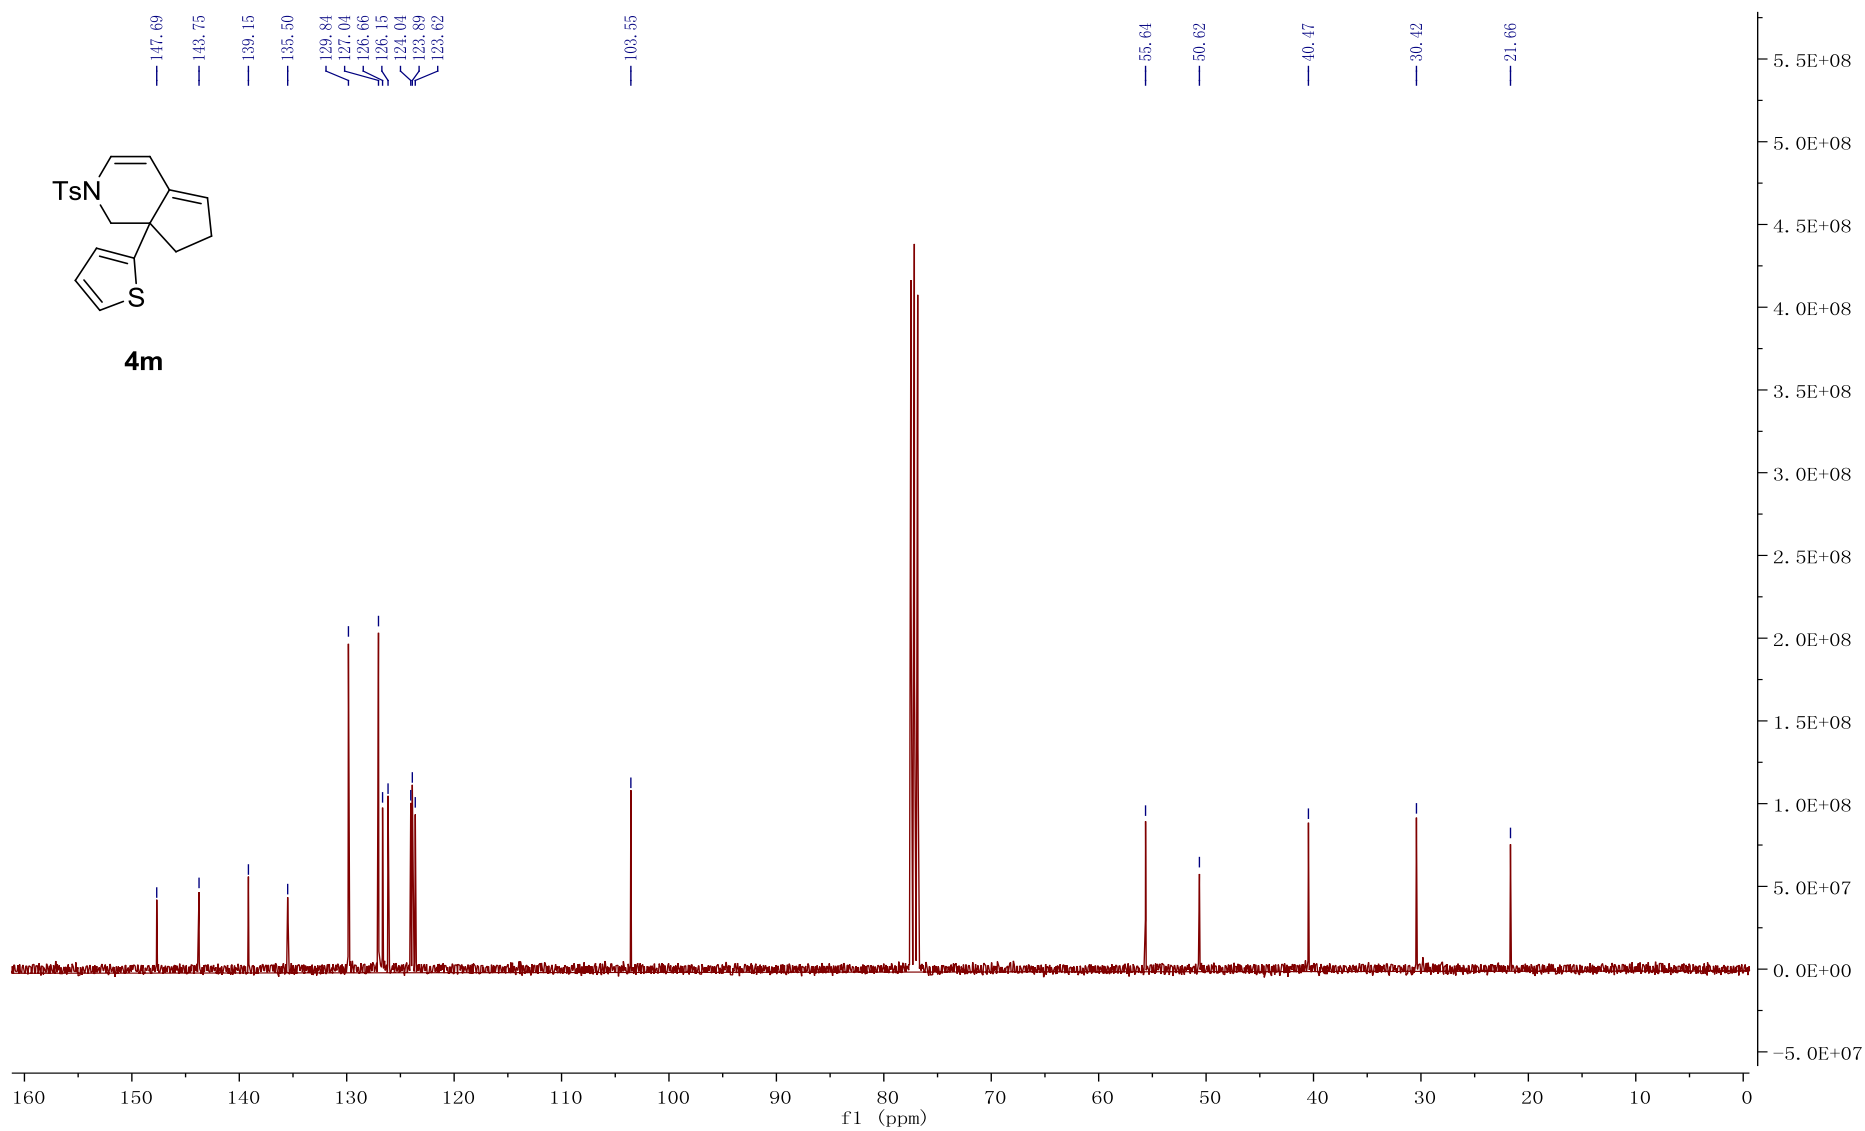

S158

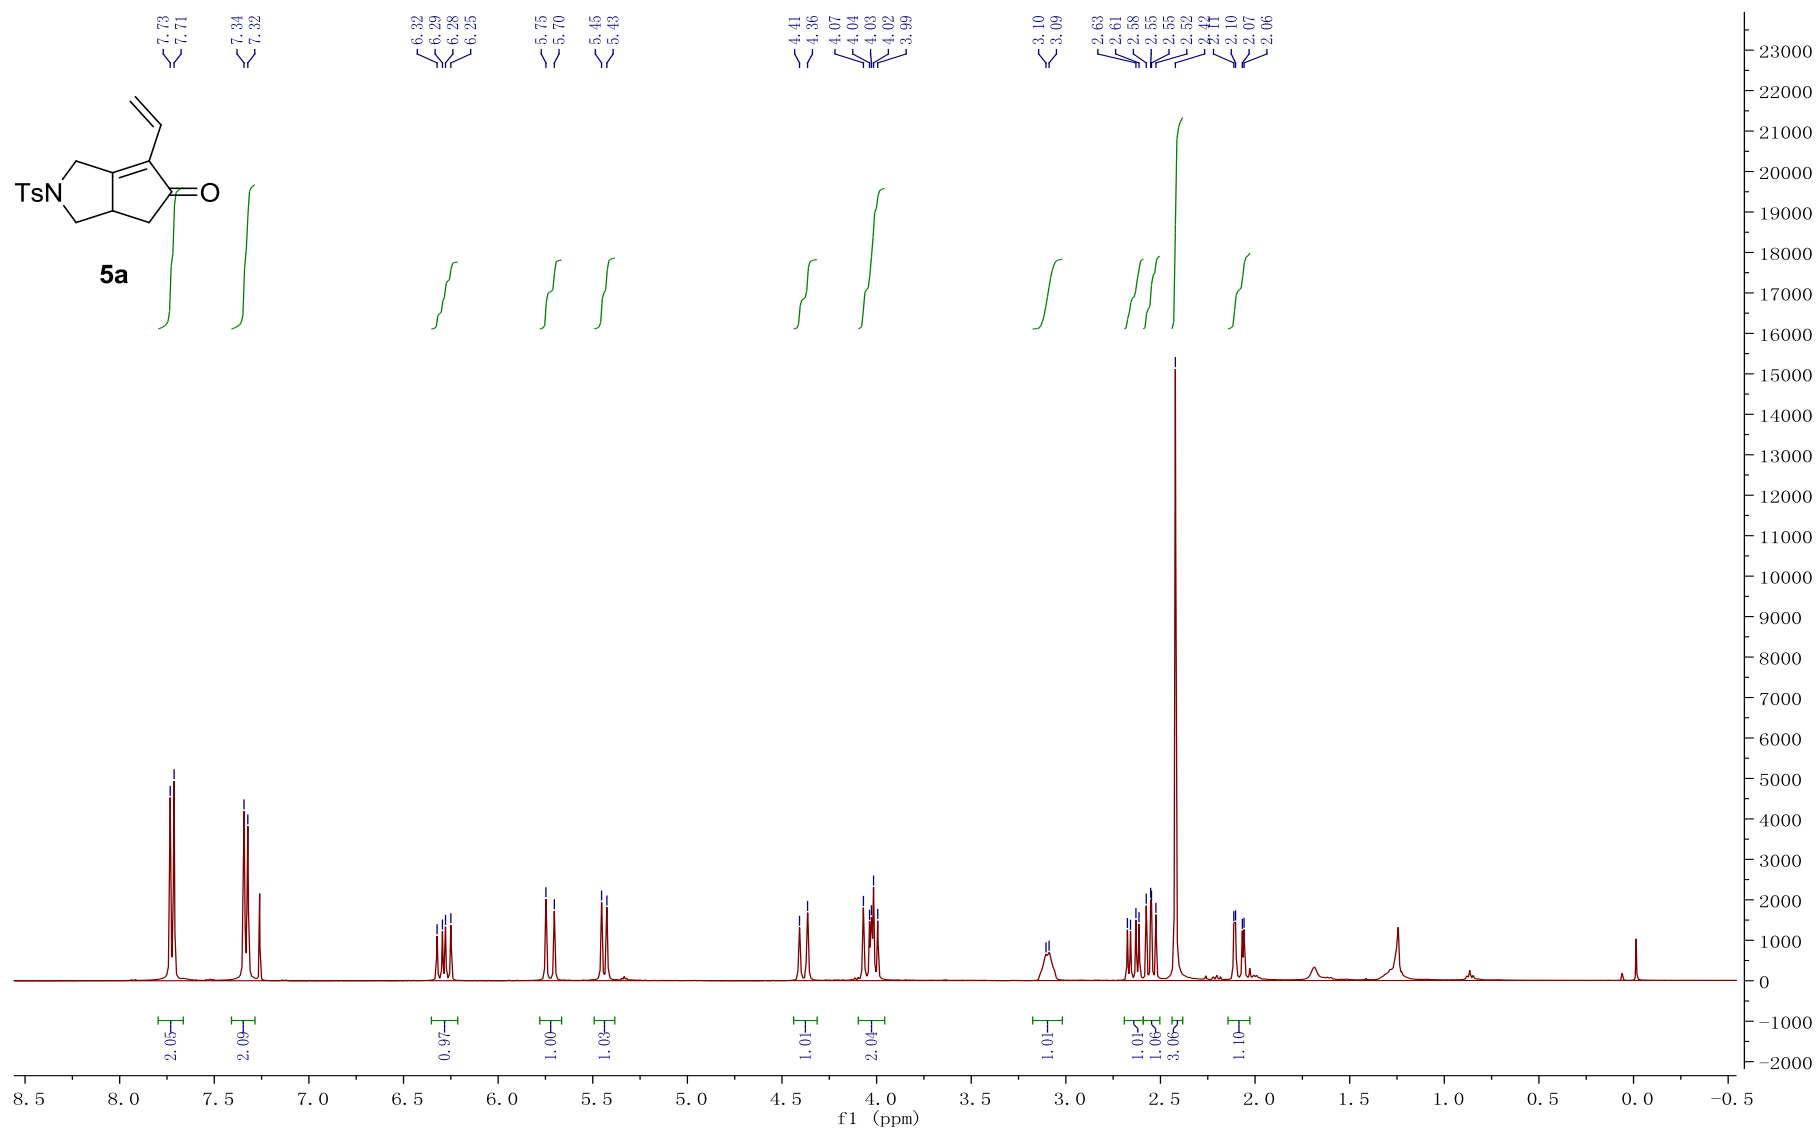

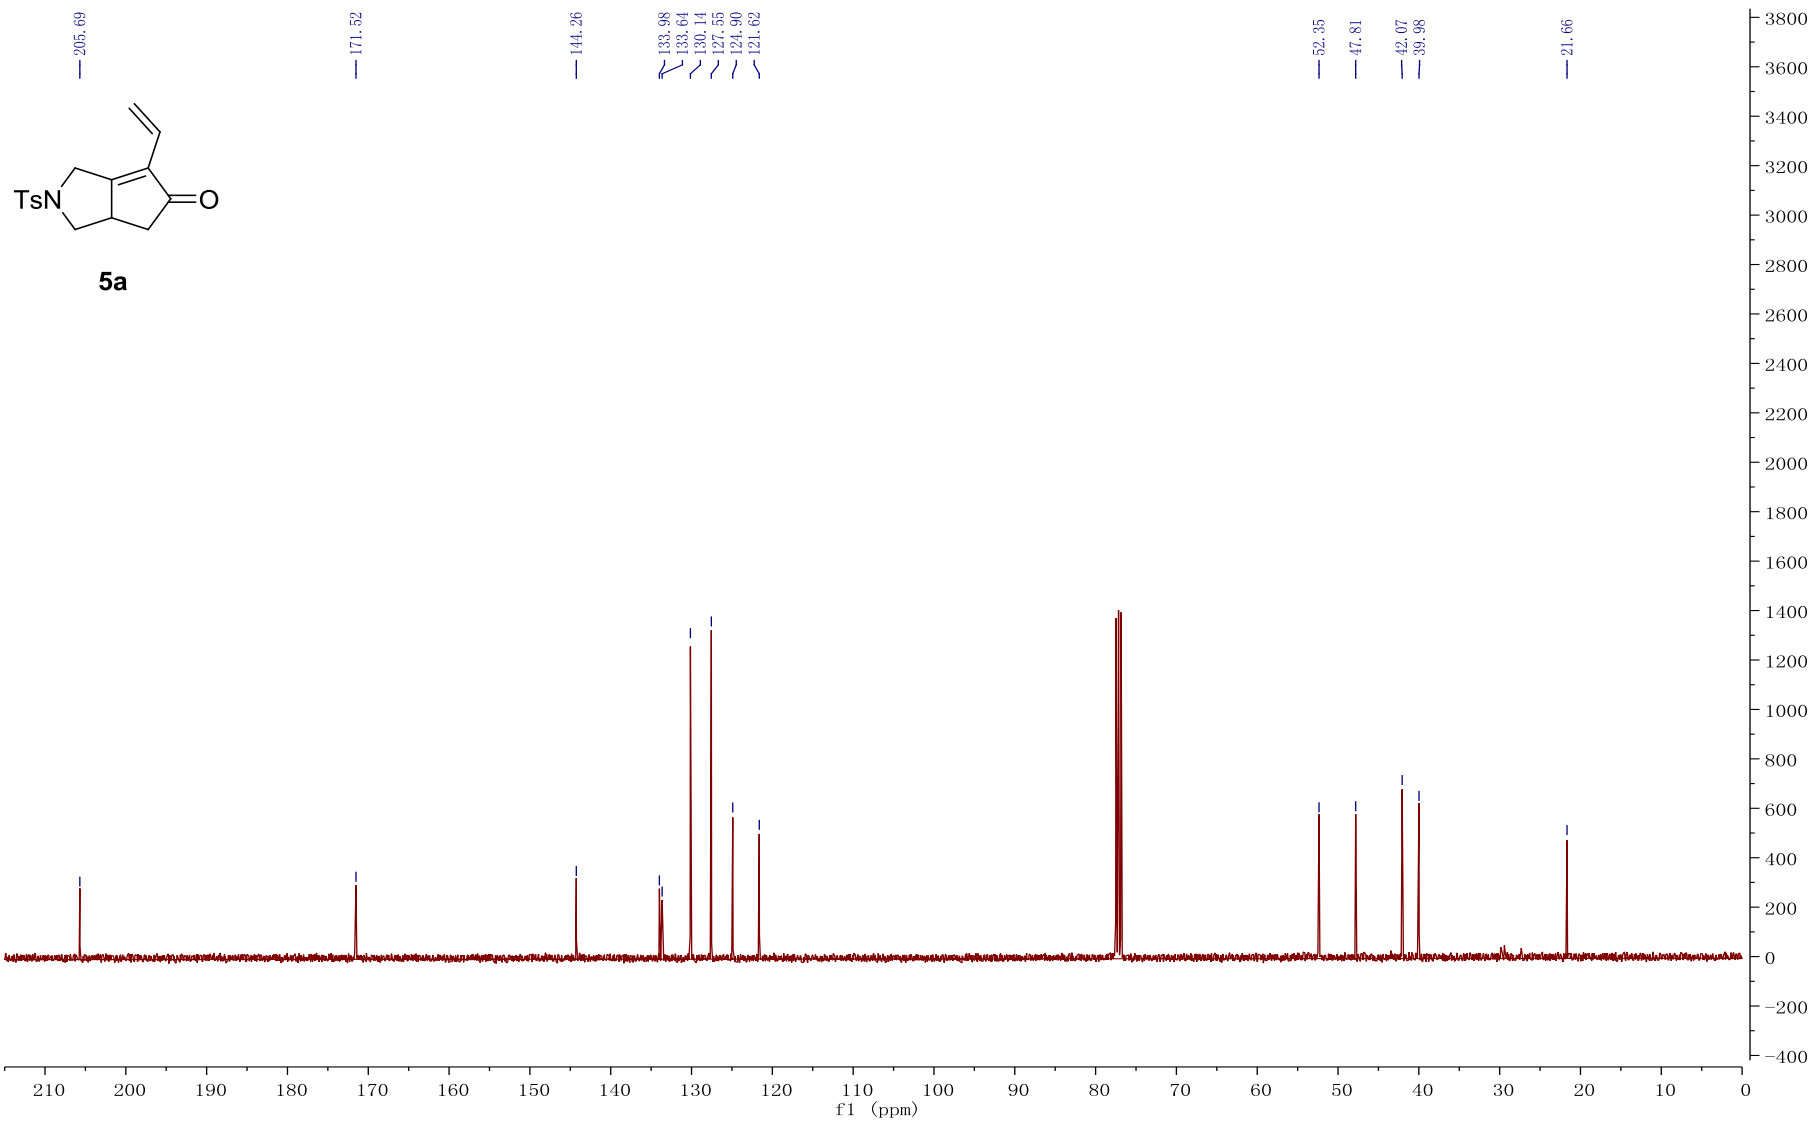

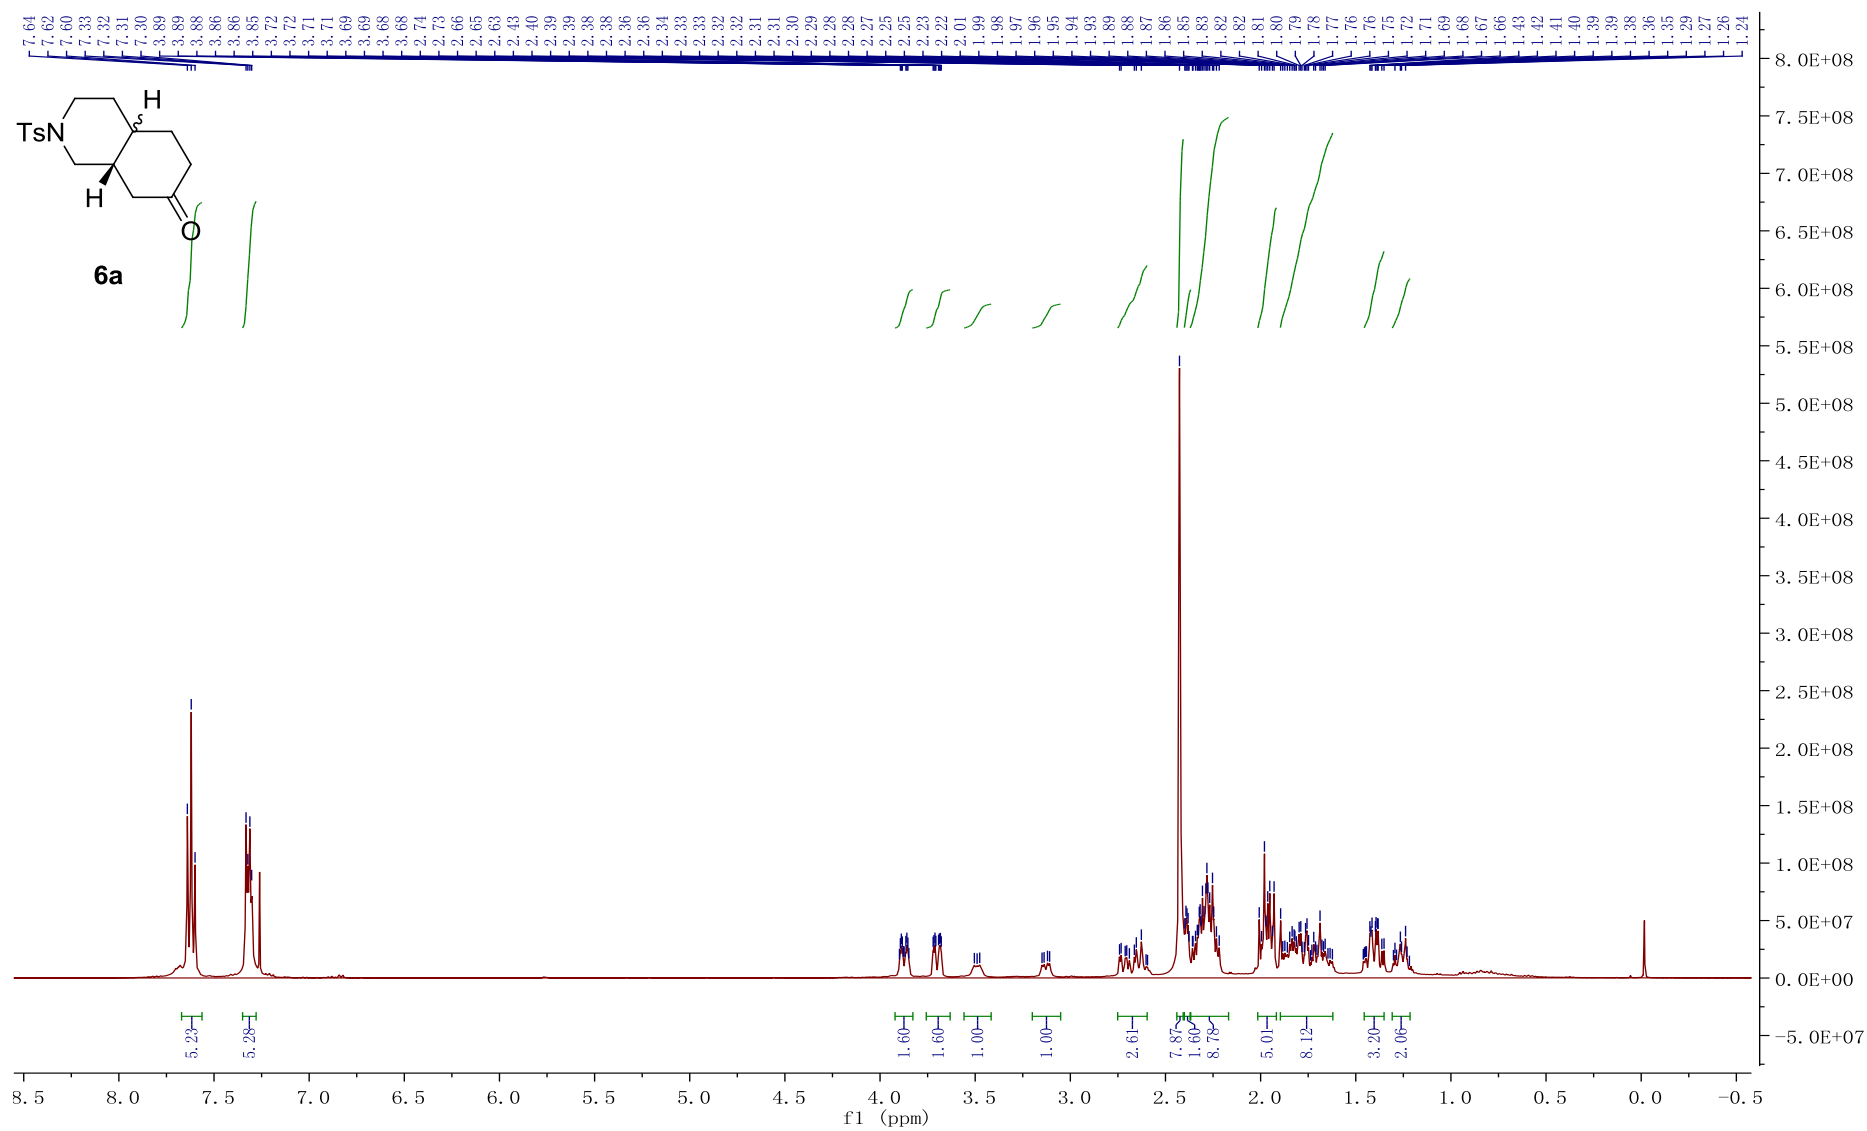

S161

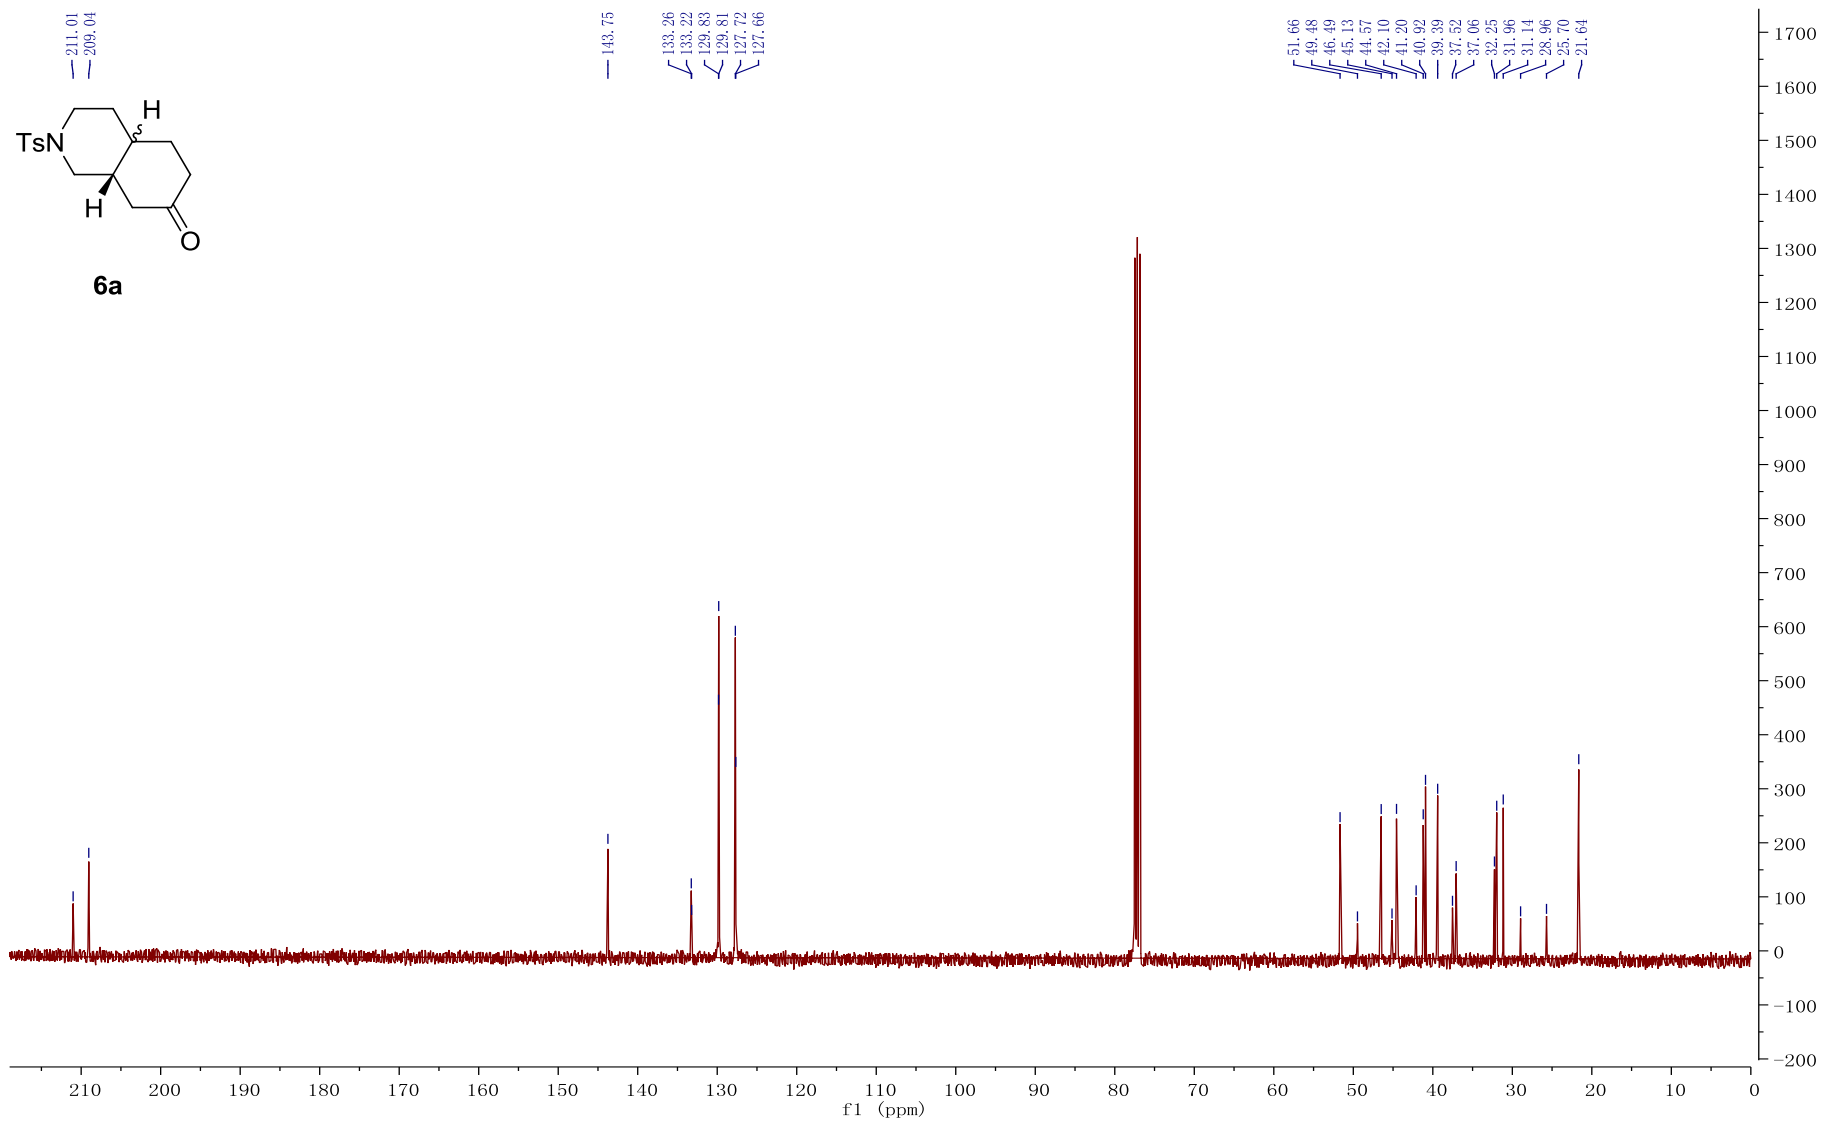

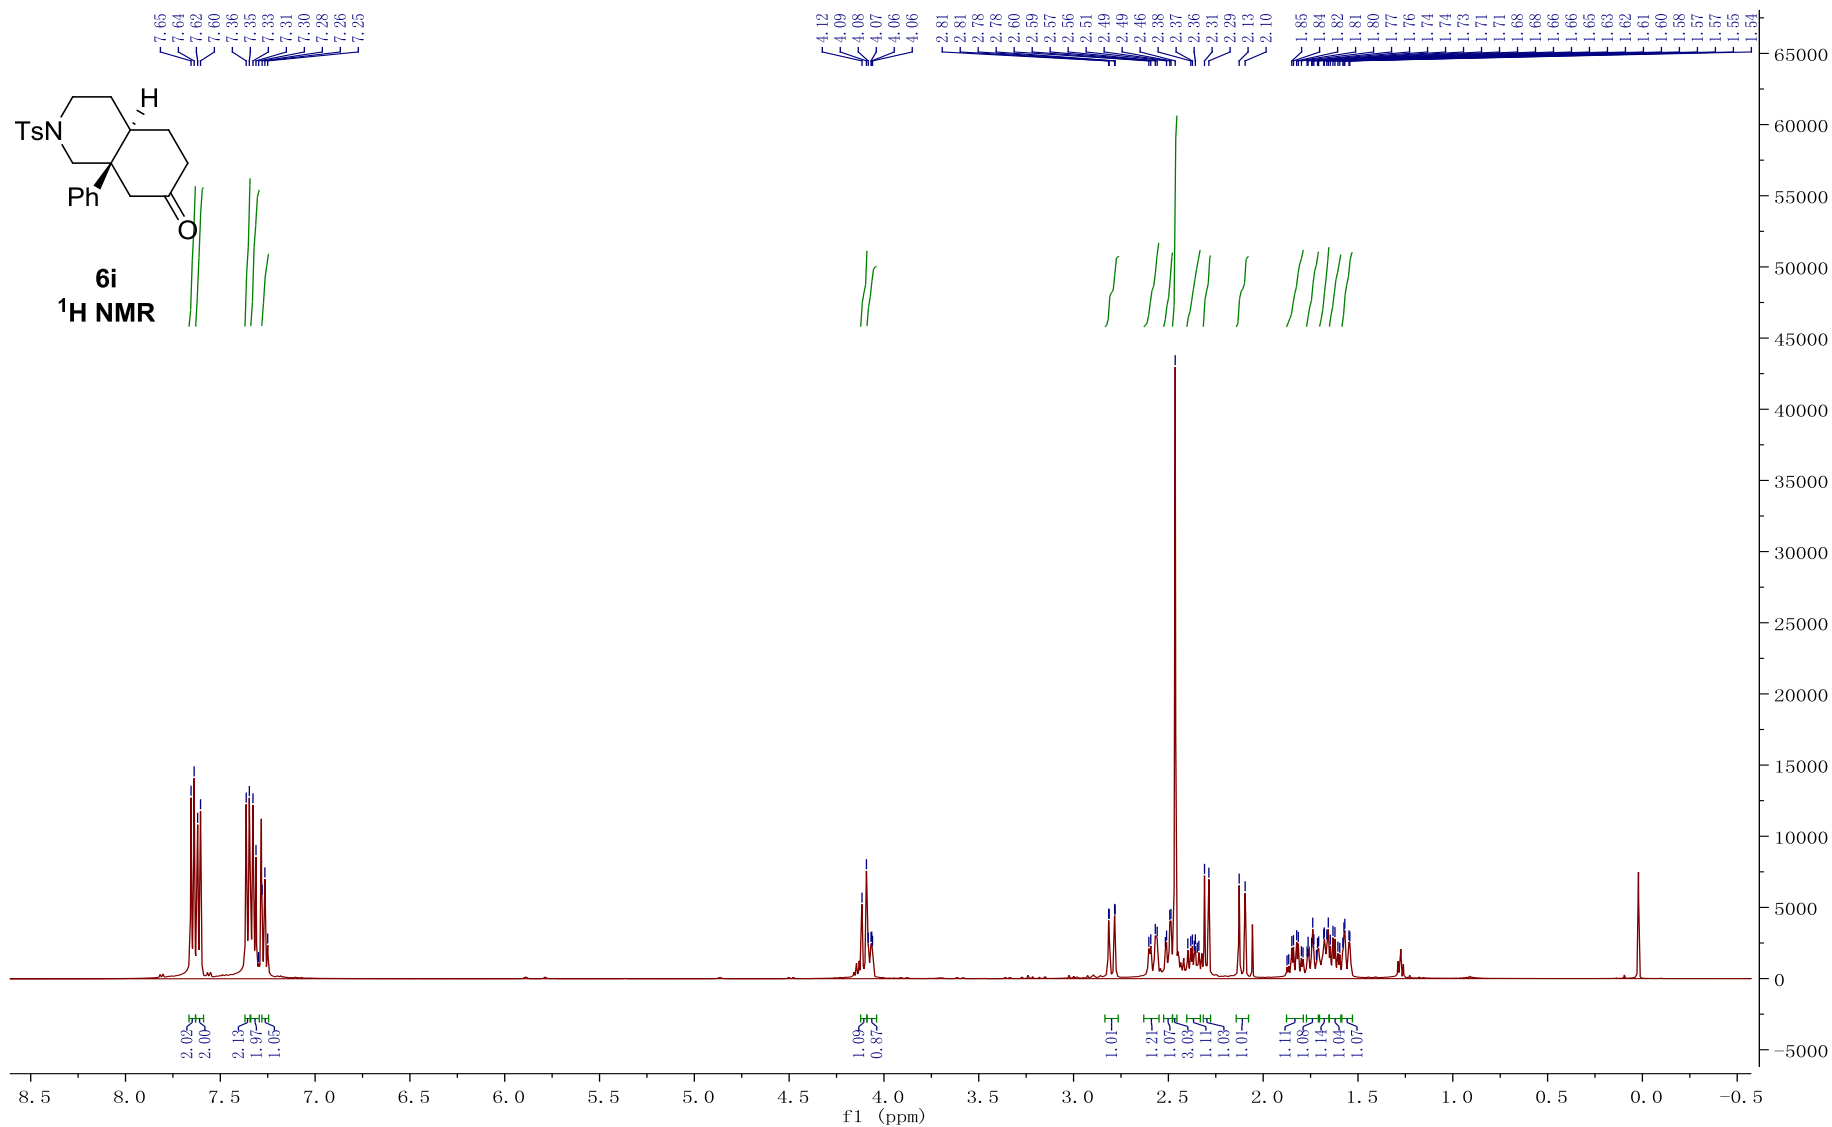

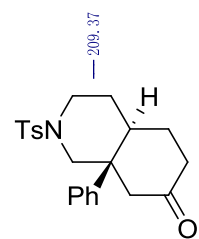

**6i**  
**<sup>13</sup>C NMR**

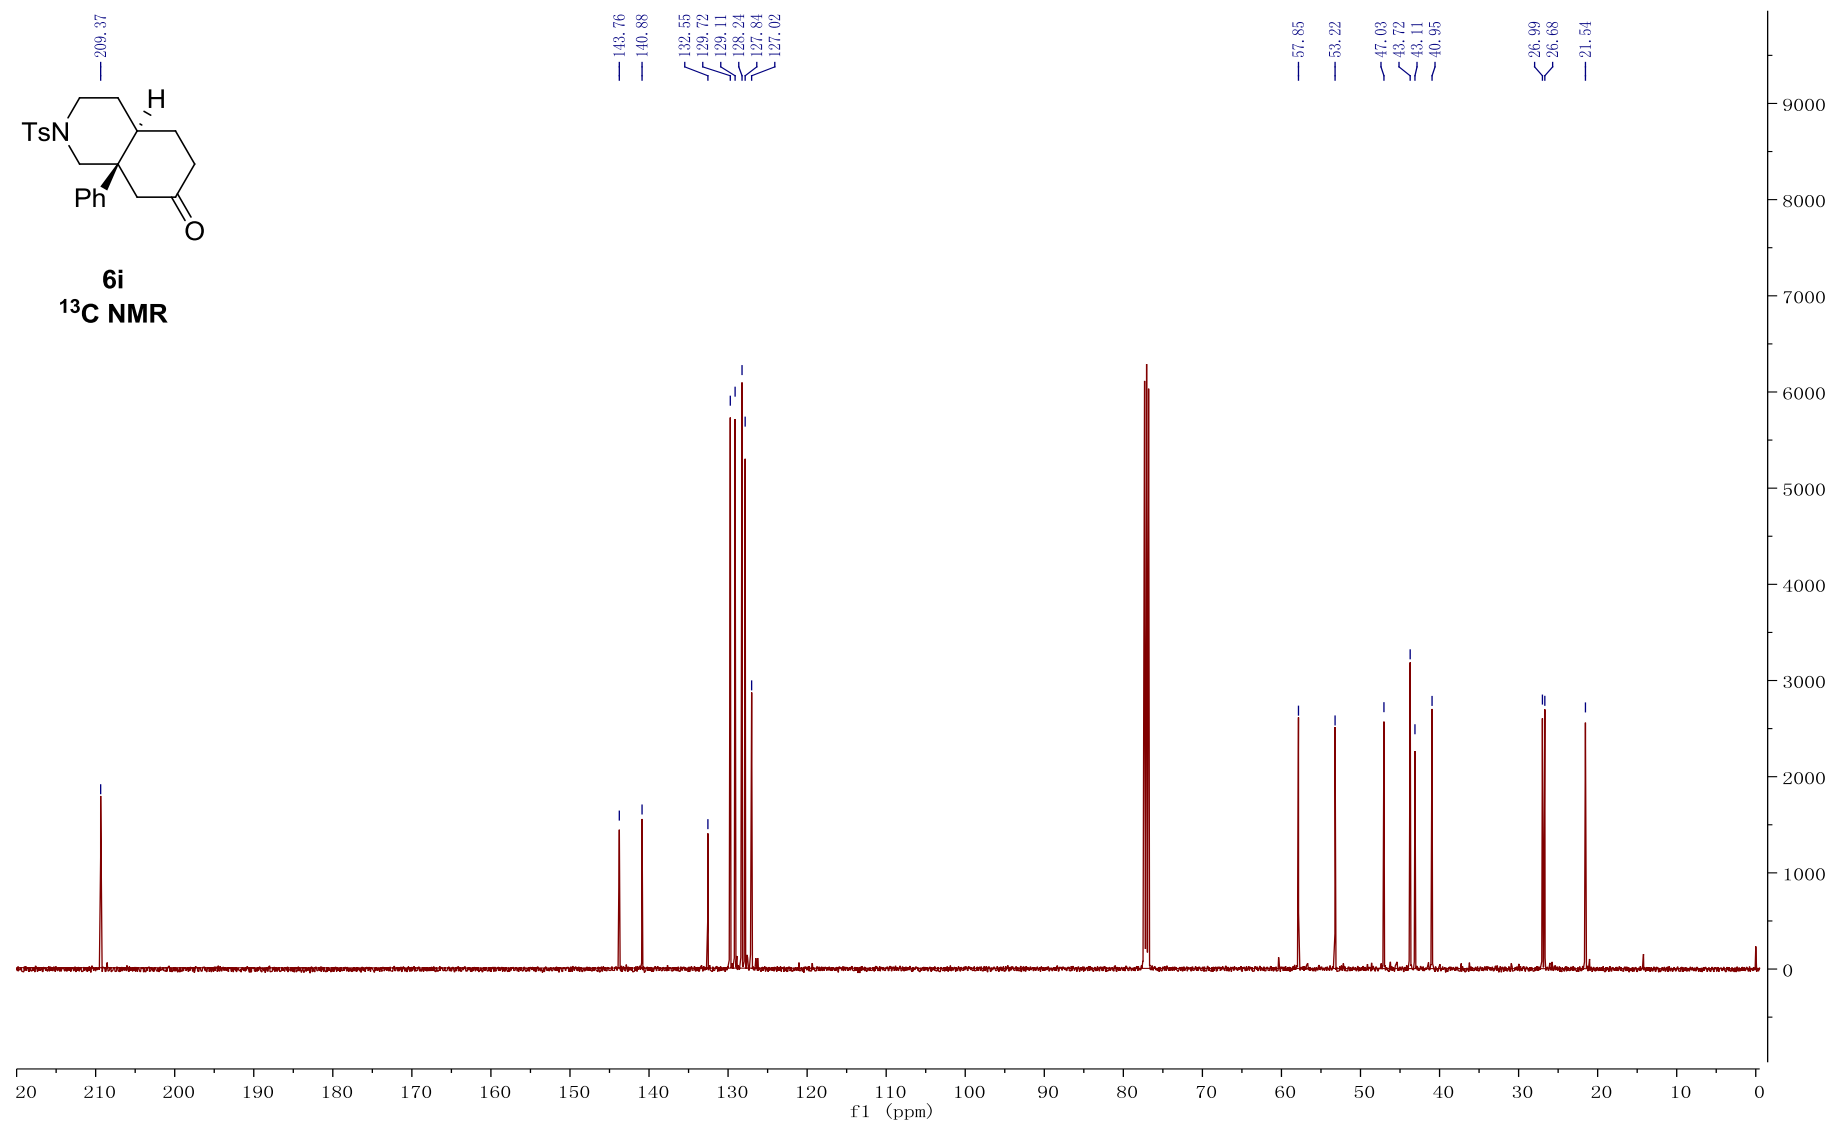

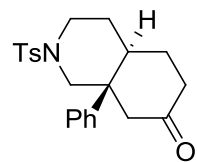

**6i**  
**DEPT**

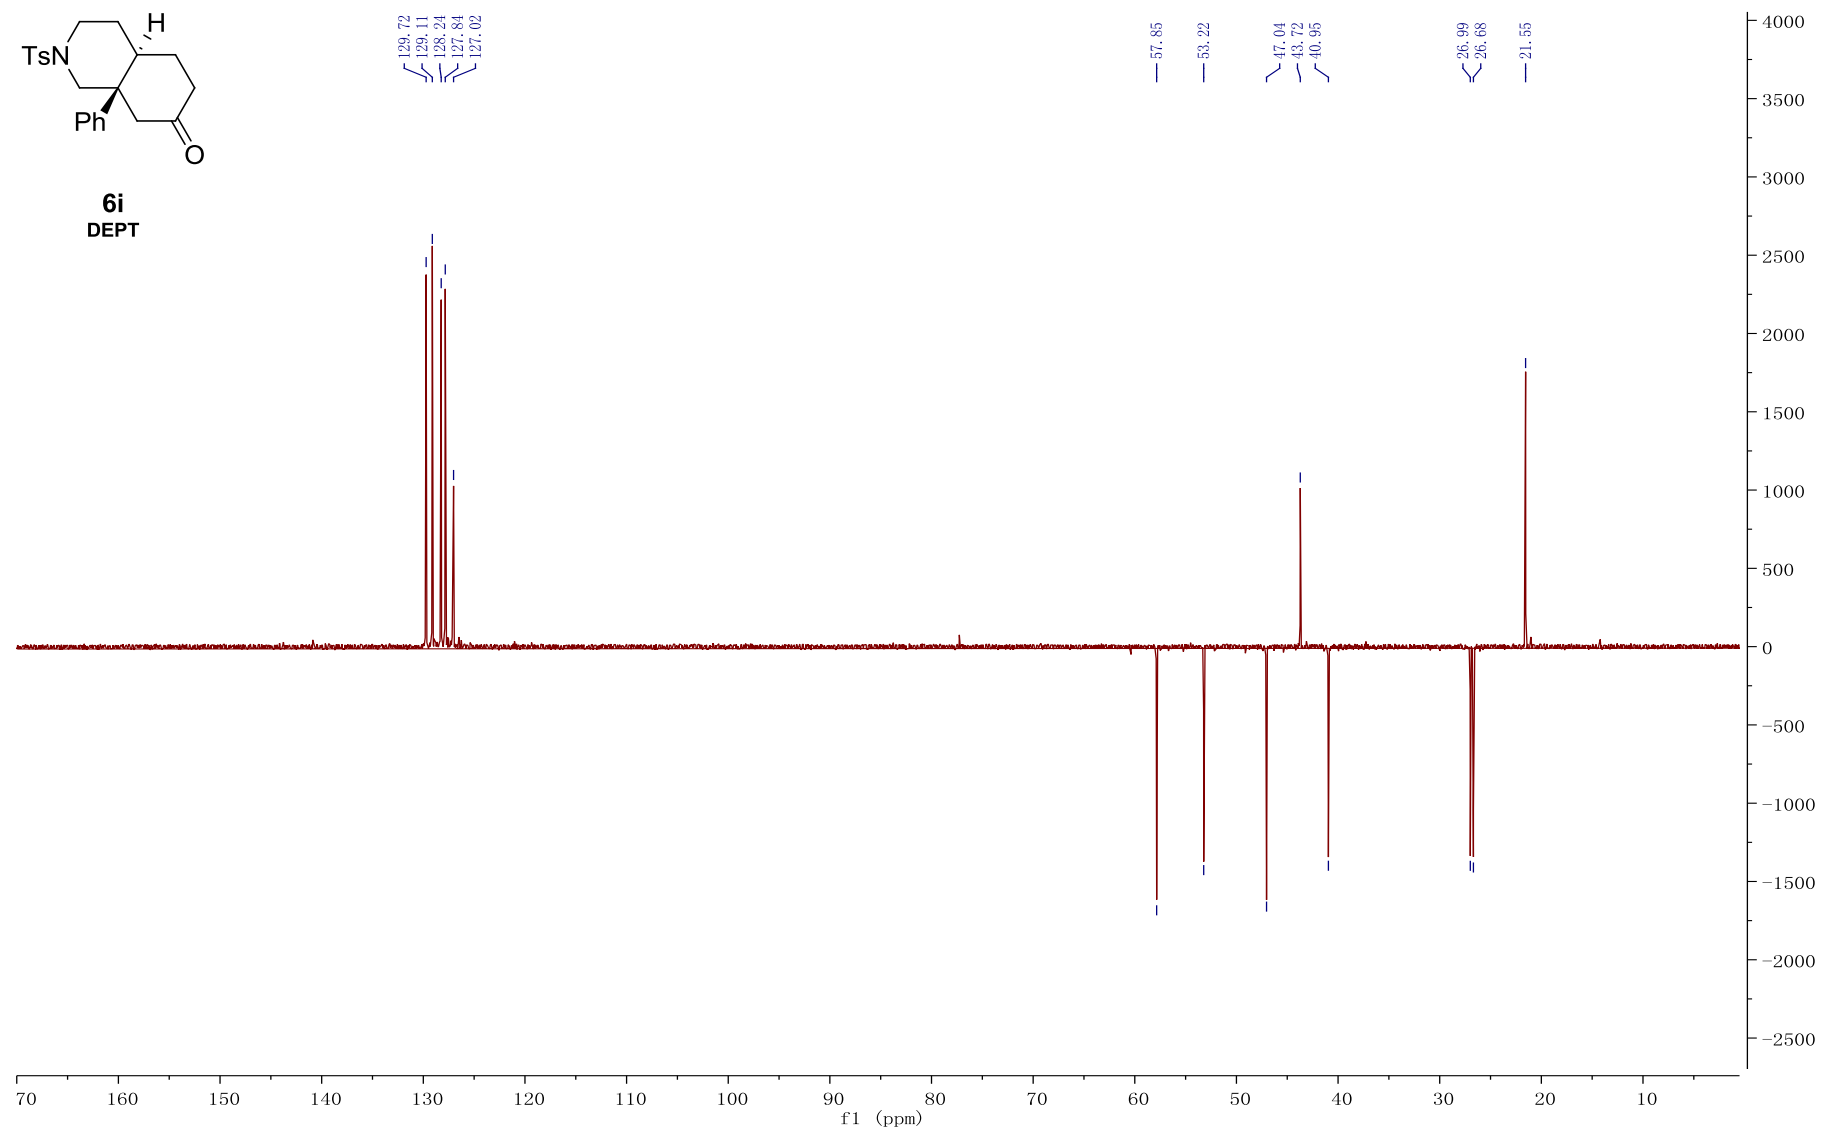

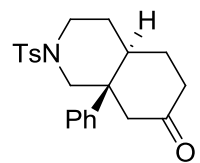

**6i**  
COSY

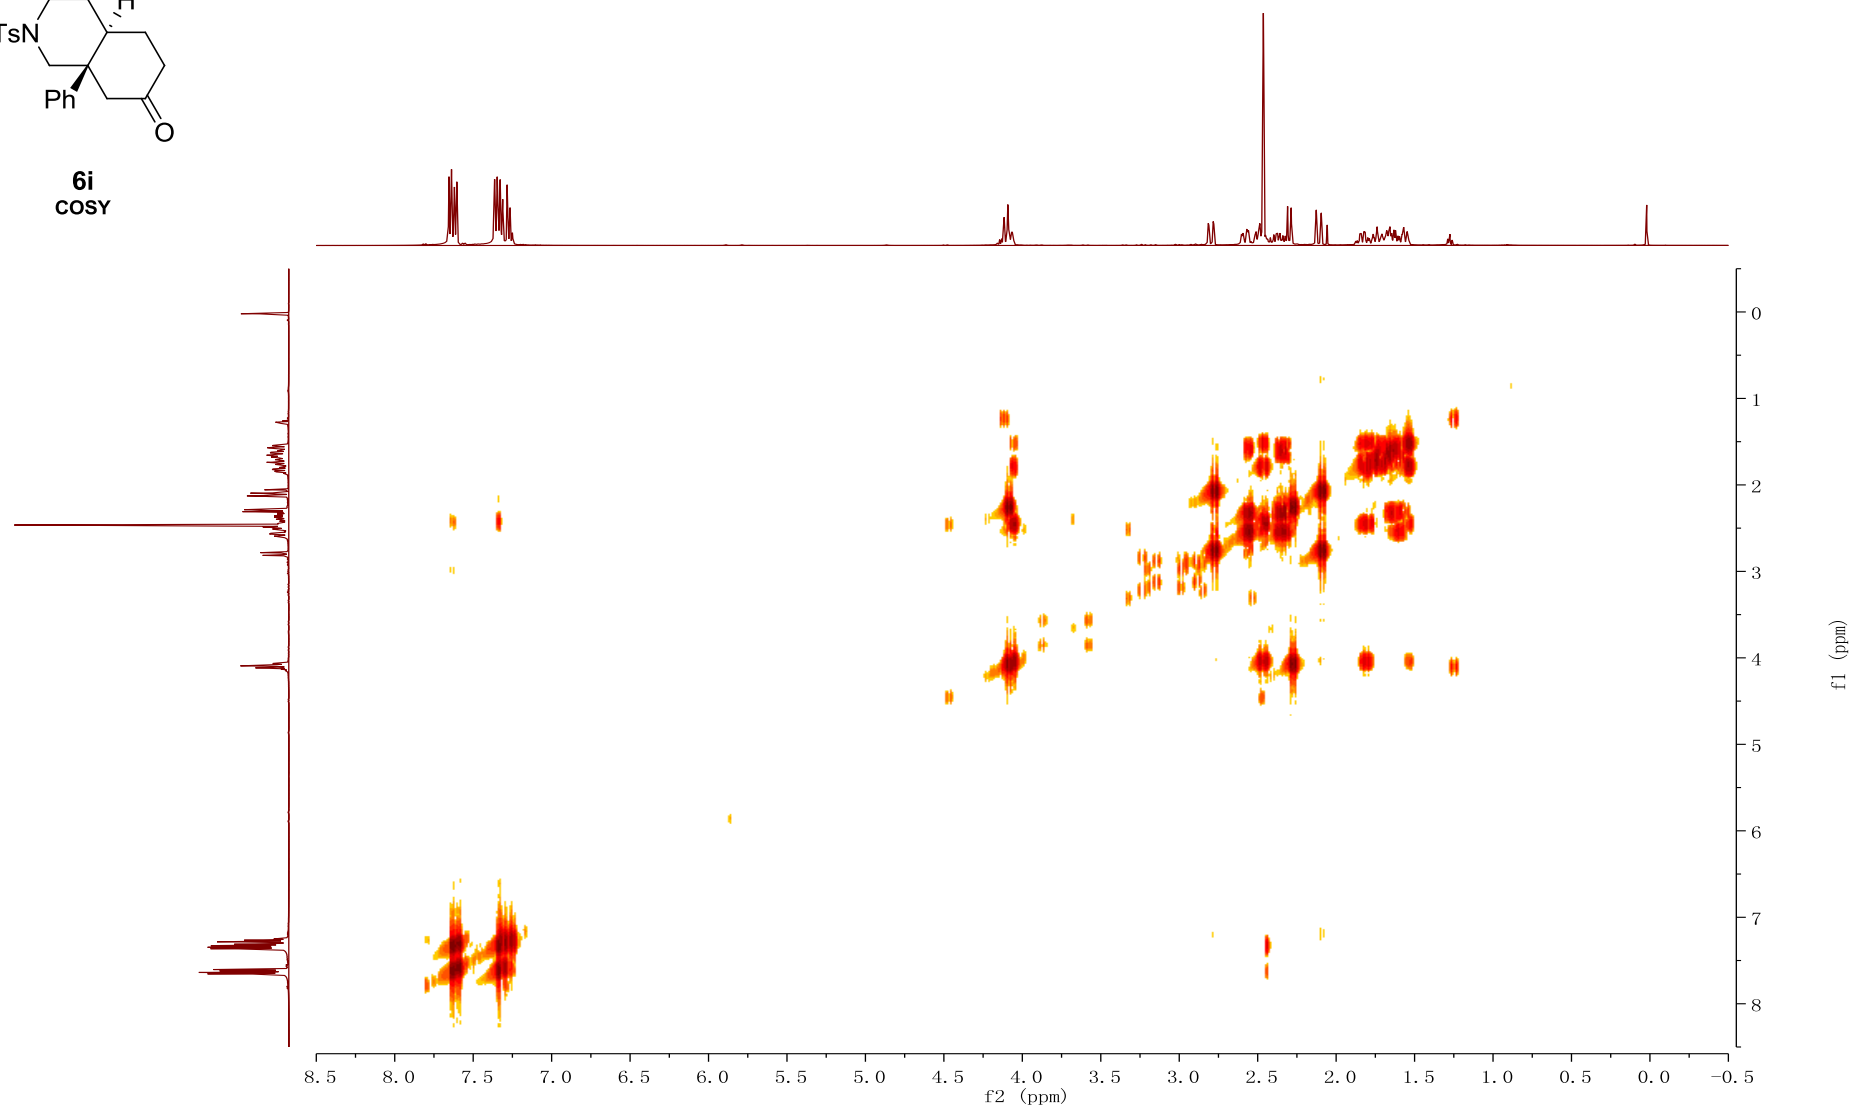

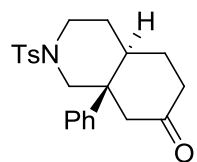

**6i**  
NOESY

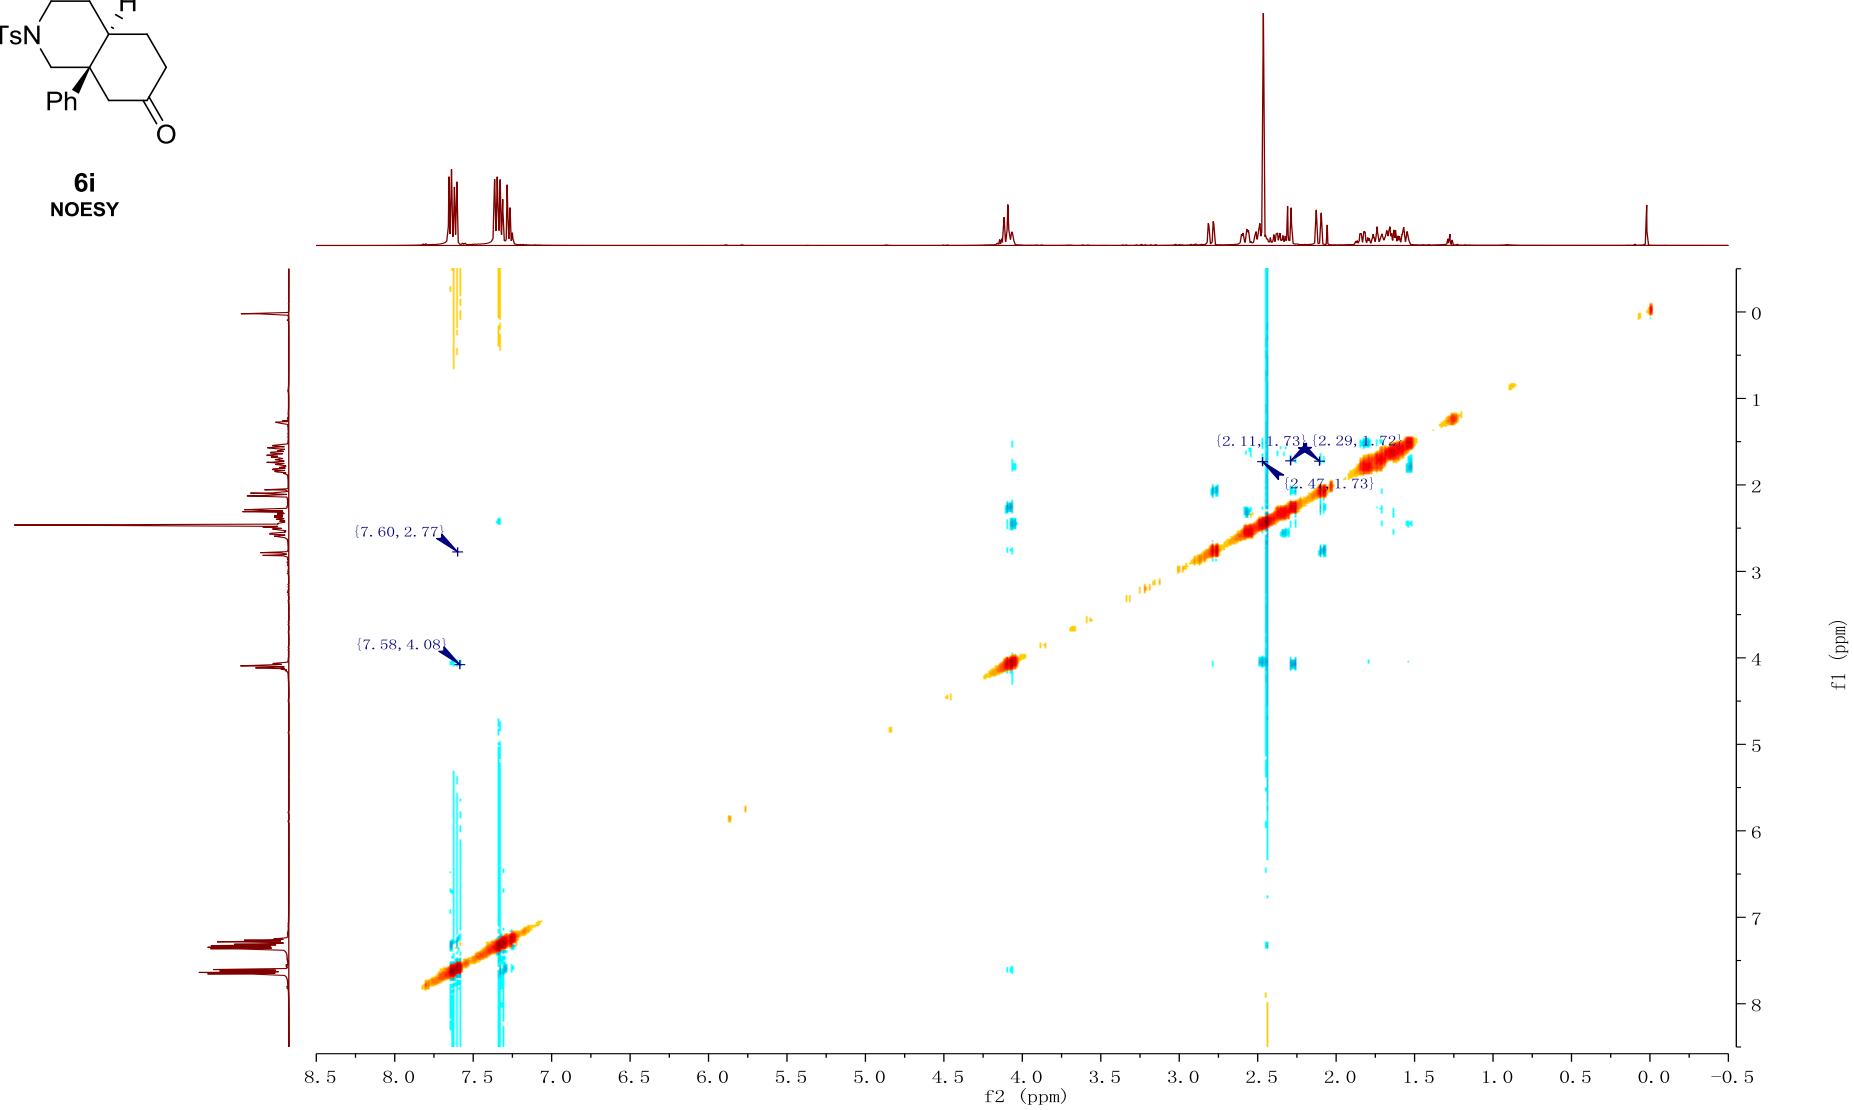

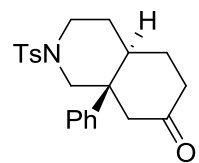

**6i**  
HSQC

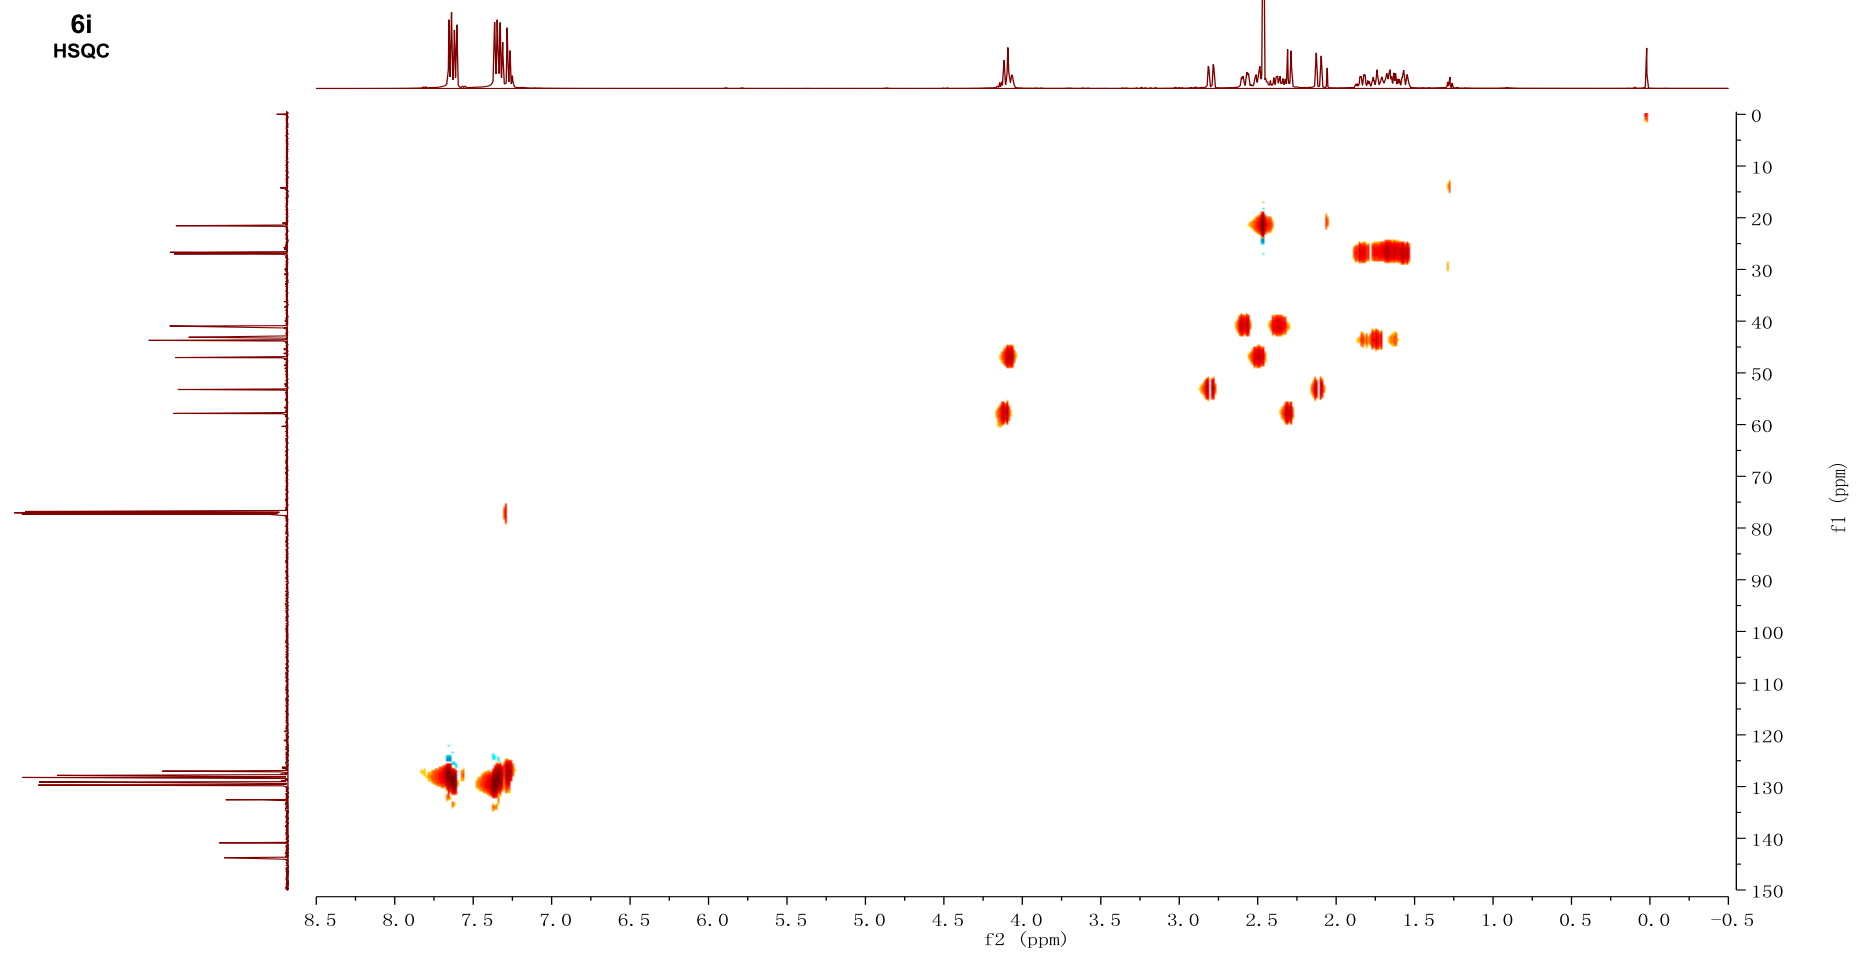

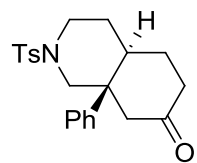

**6i**  
HMBC

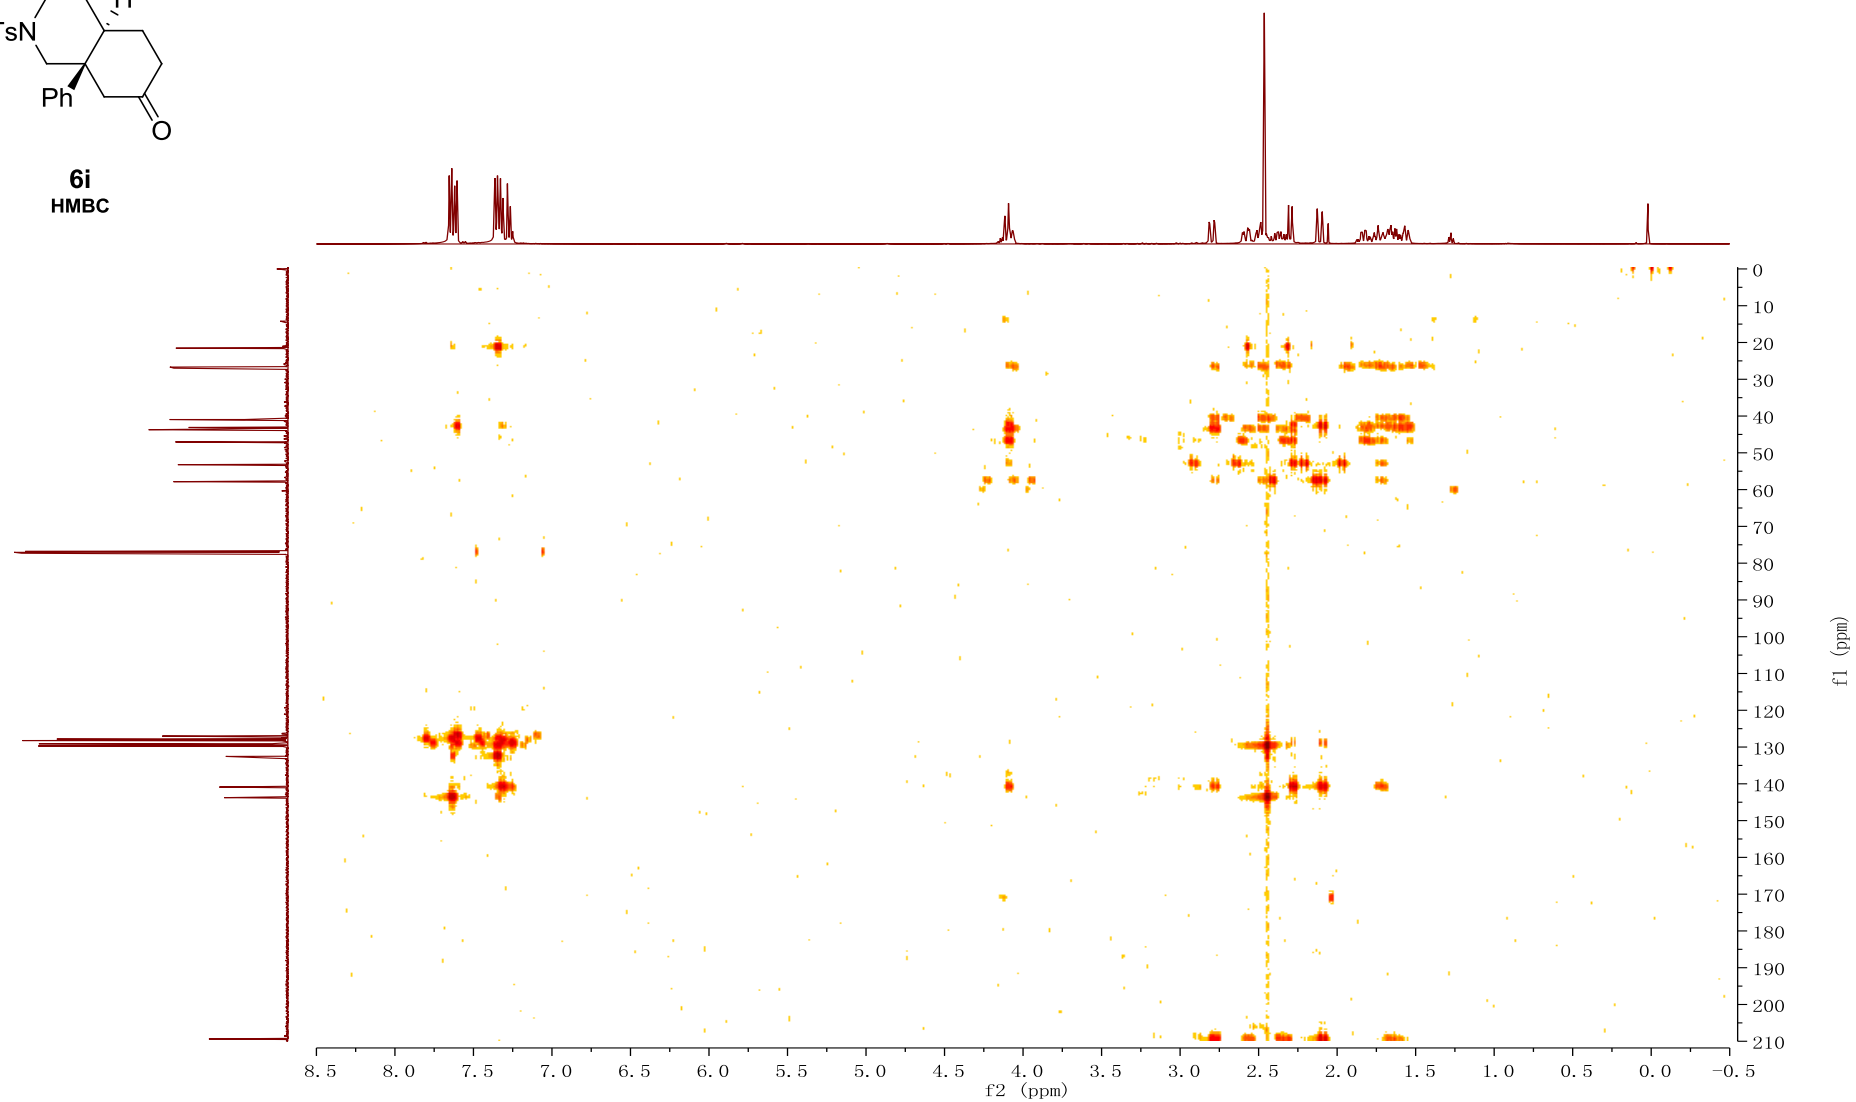

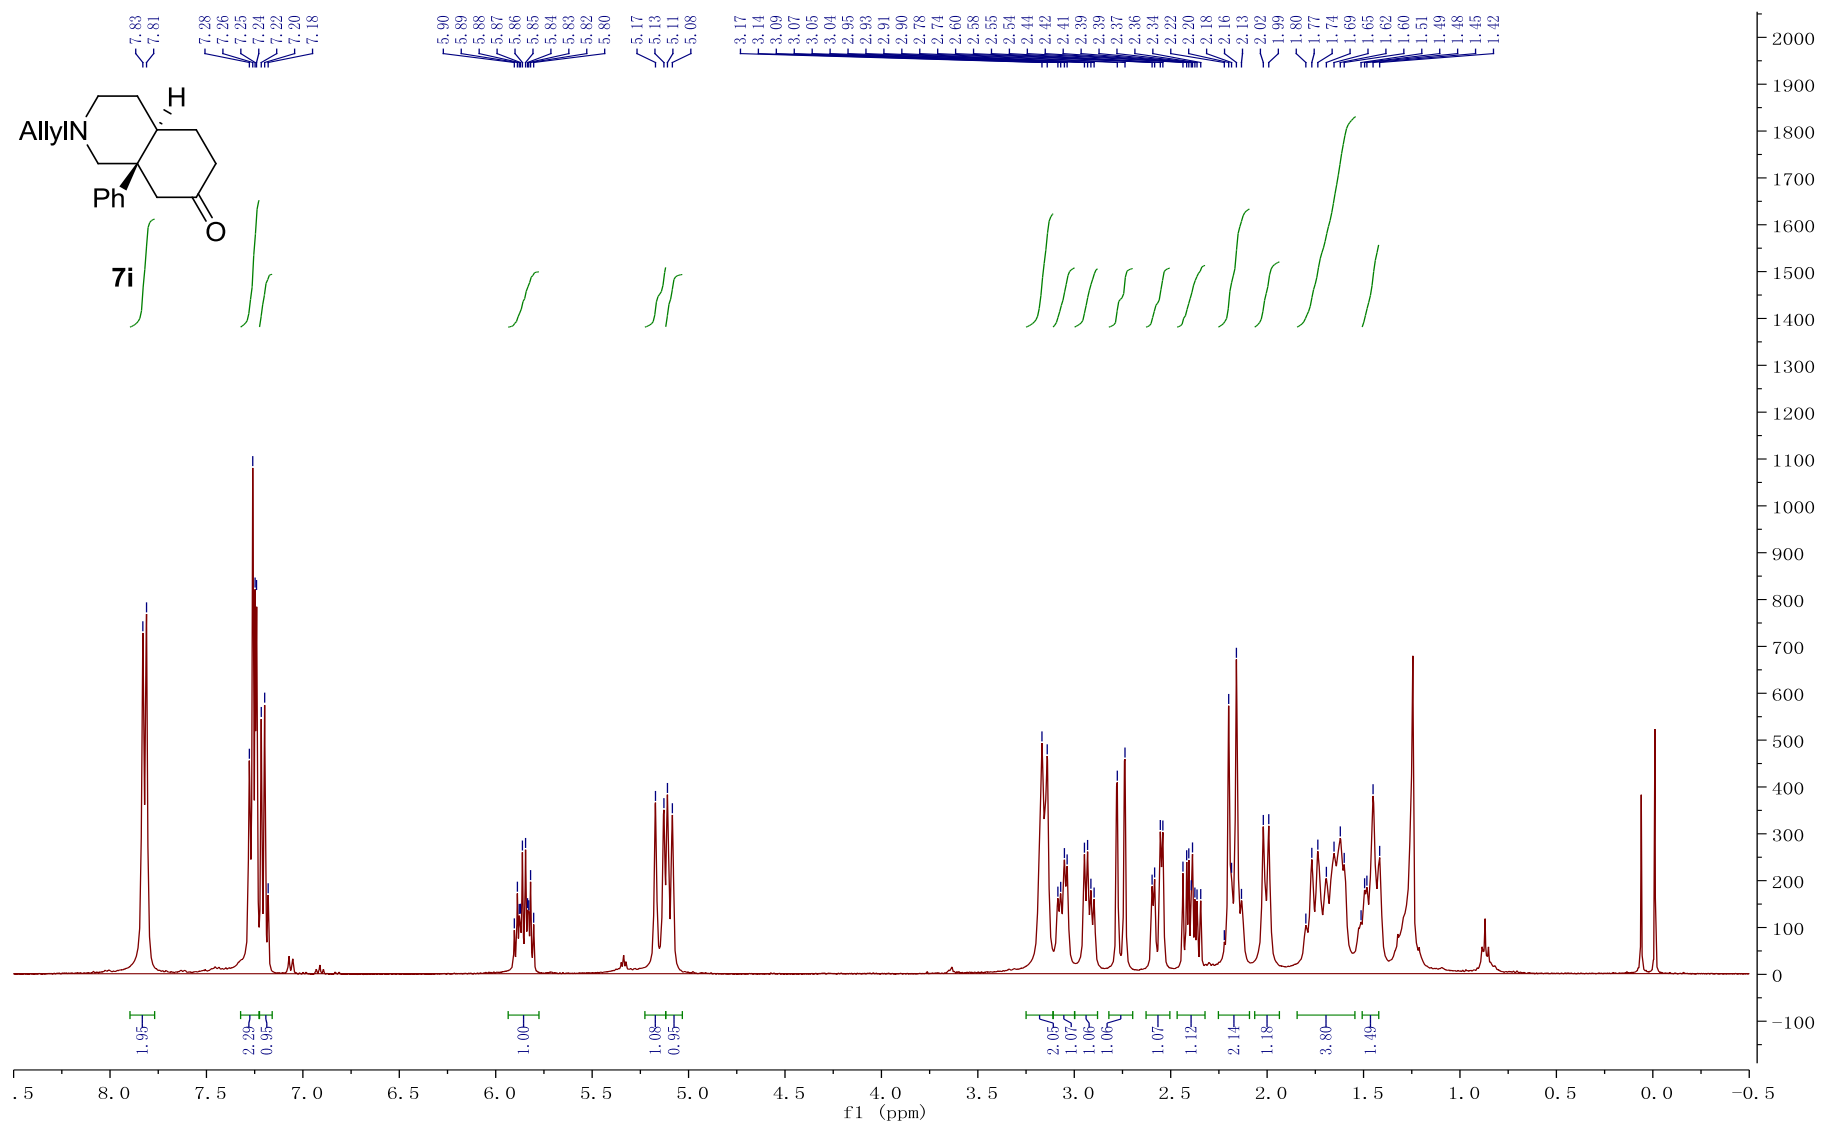

S170

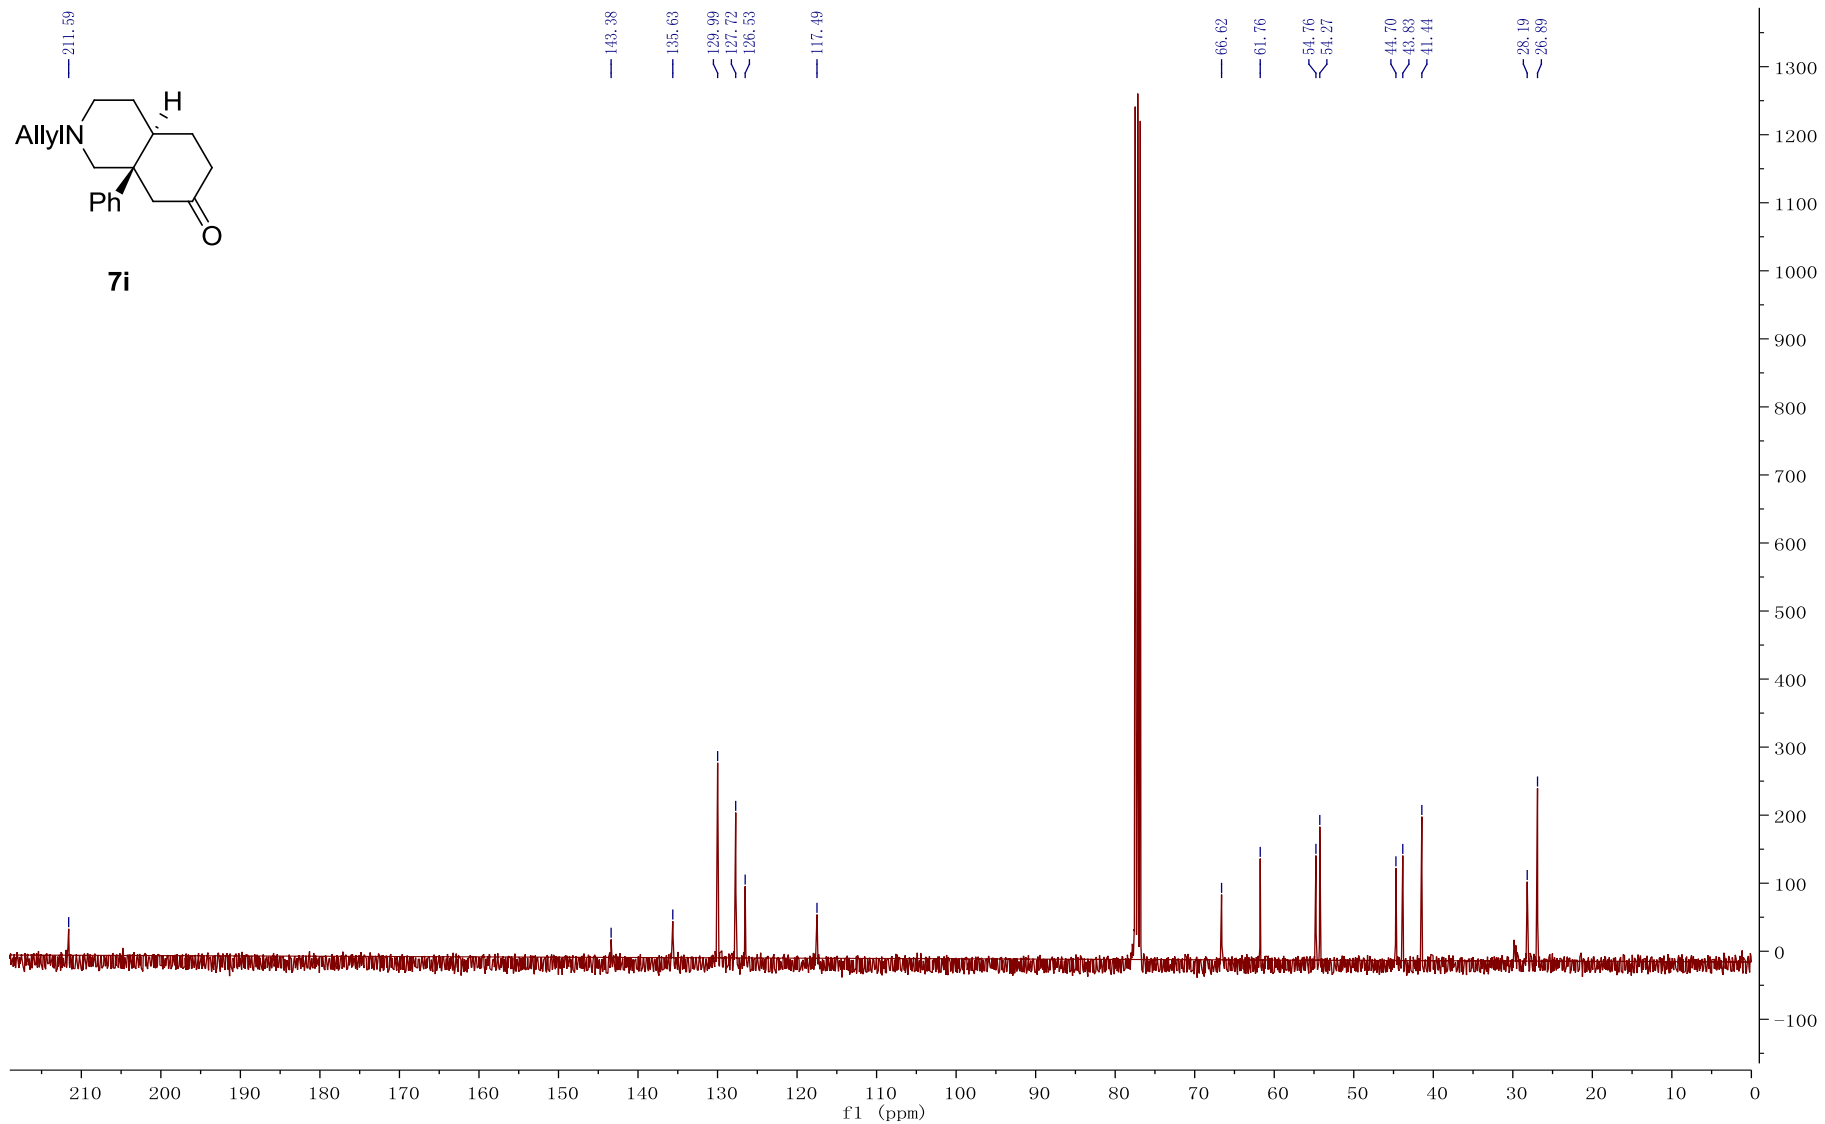

S171
